# Supplementary material
Source: publisher figshare collection journal article supplement (https://gsapubs.figshare.com/articles/dataset/_/24442948)

SUPPLEMENTAL FILE S3-B. PLATEAU AND ISOCHRON PLOTS FOR BLVC, BAUGHMAN, AND SUMMER COON VOLCANOES

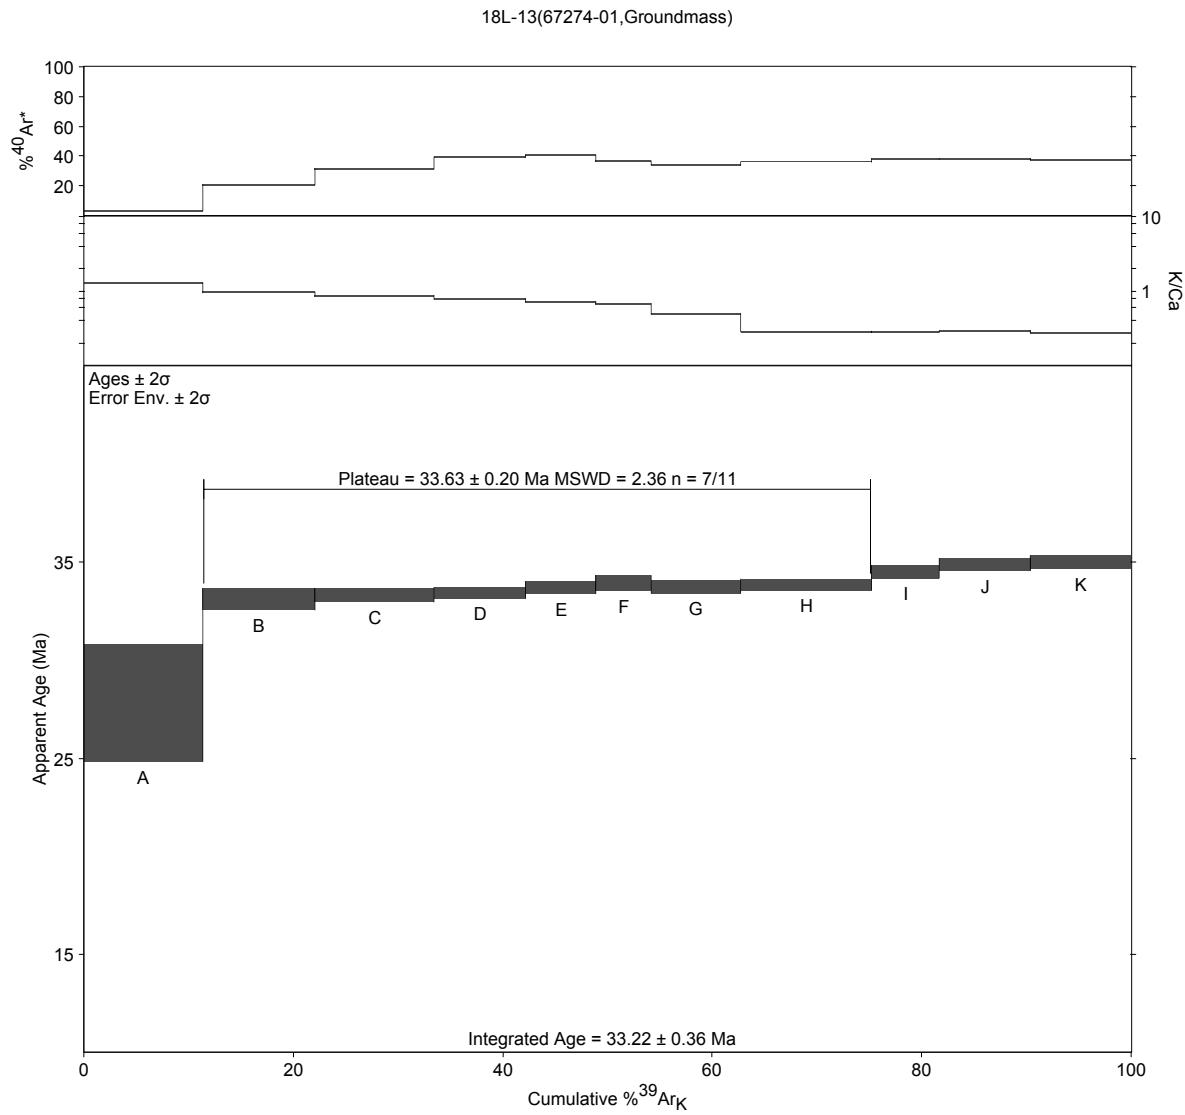

18L-14(67860-01,Biotite)

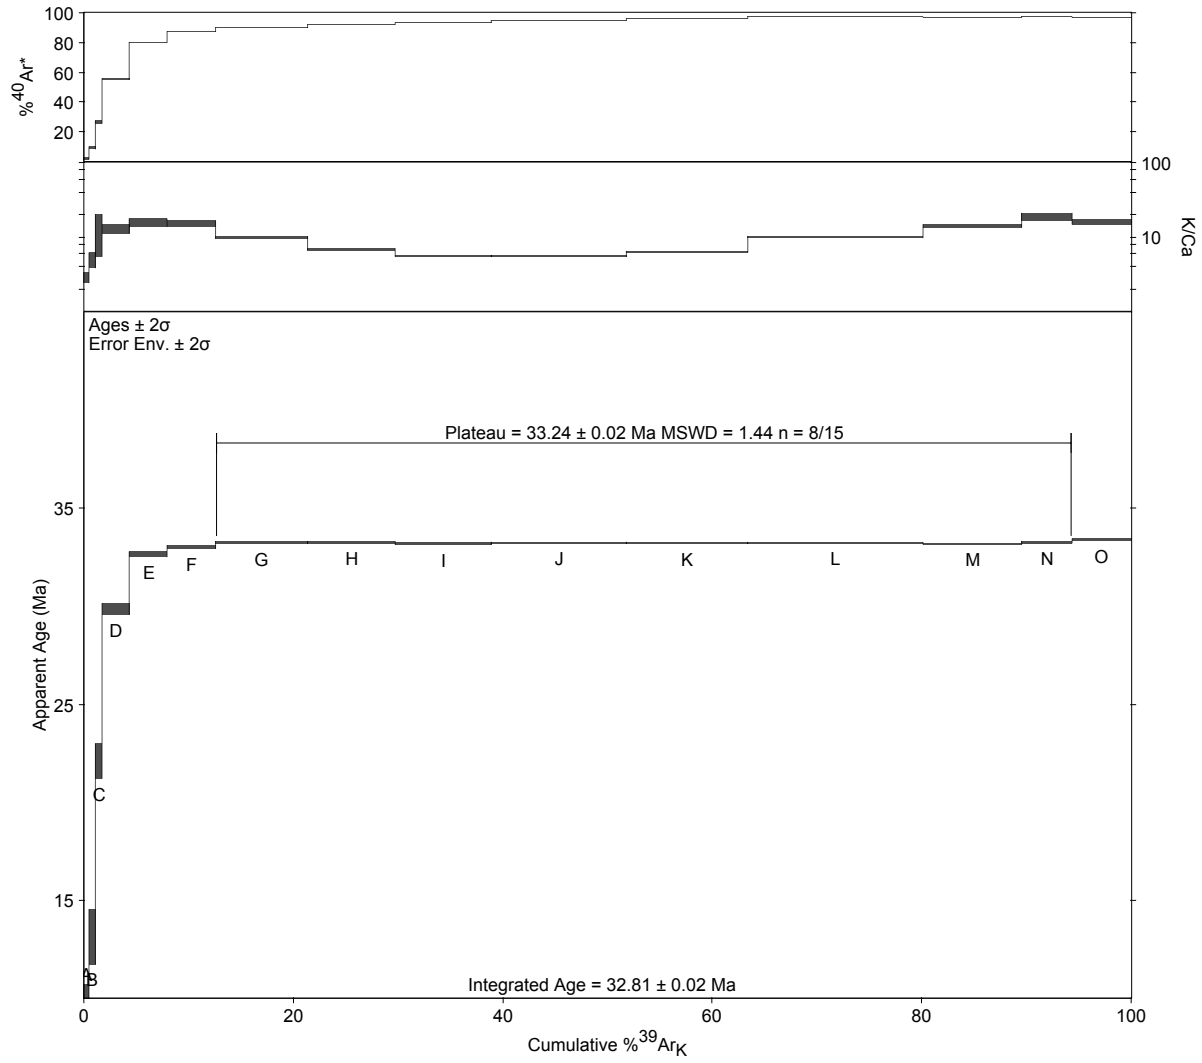

18L-14(67861-01,Hornblende)

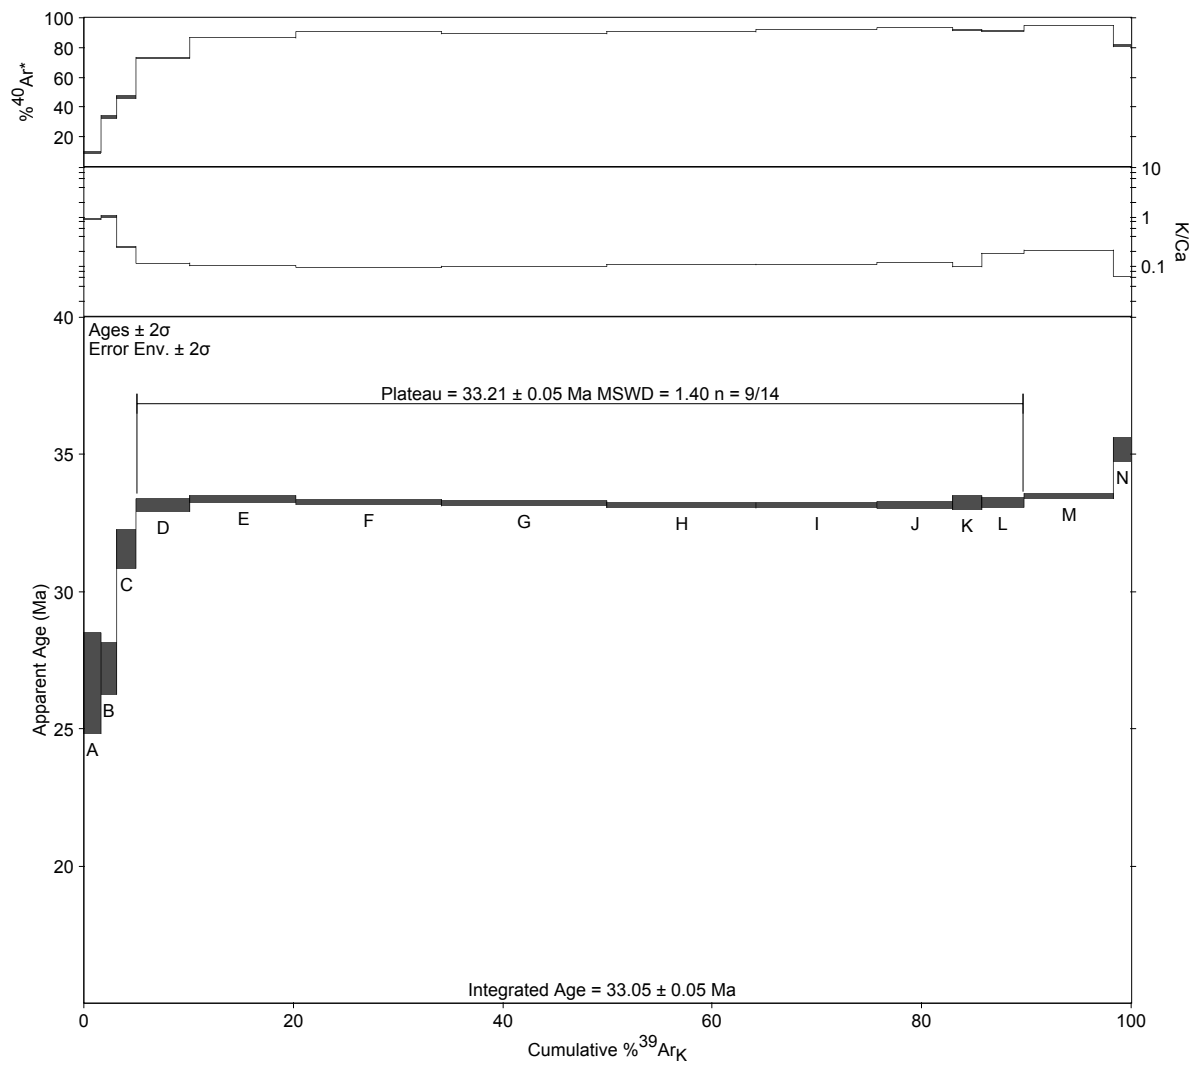

18L-9(67294-01,Hornblende)

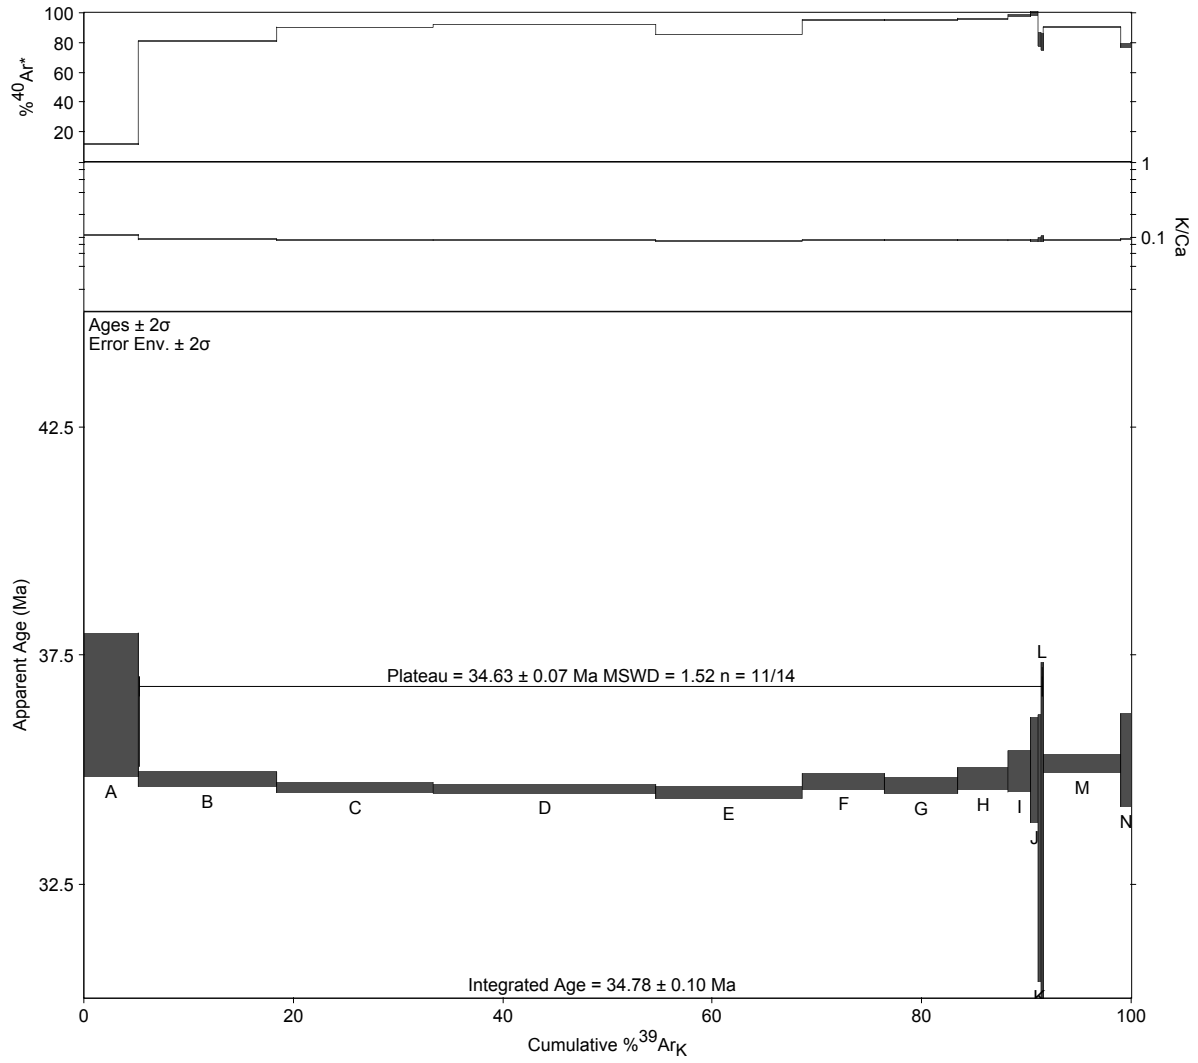

18L-12(67297-01,Hornblende)

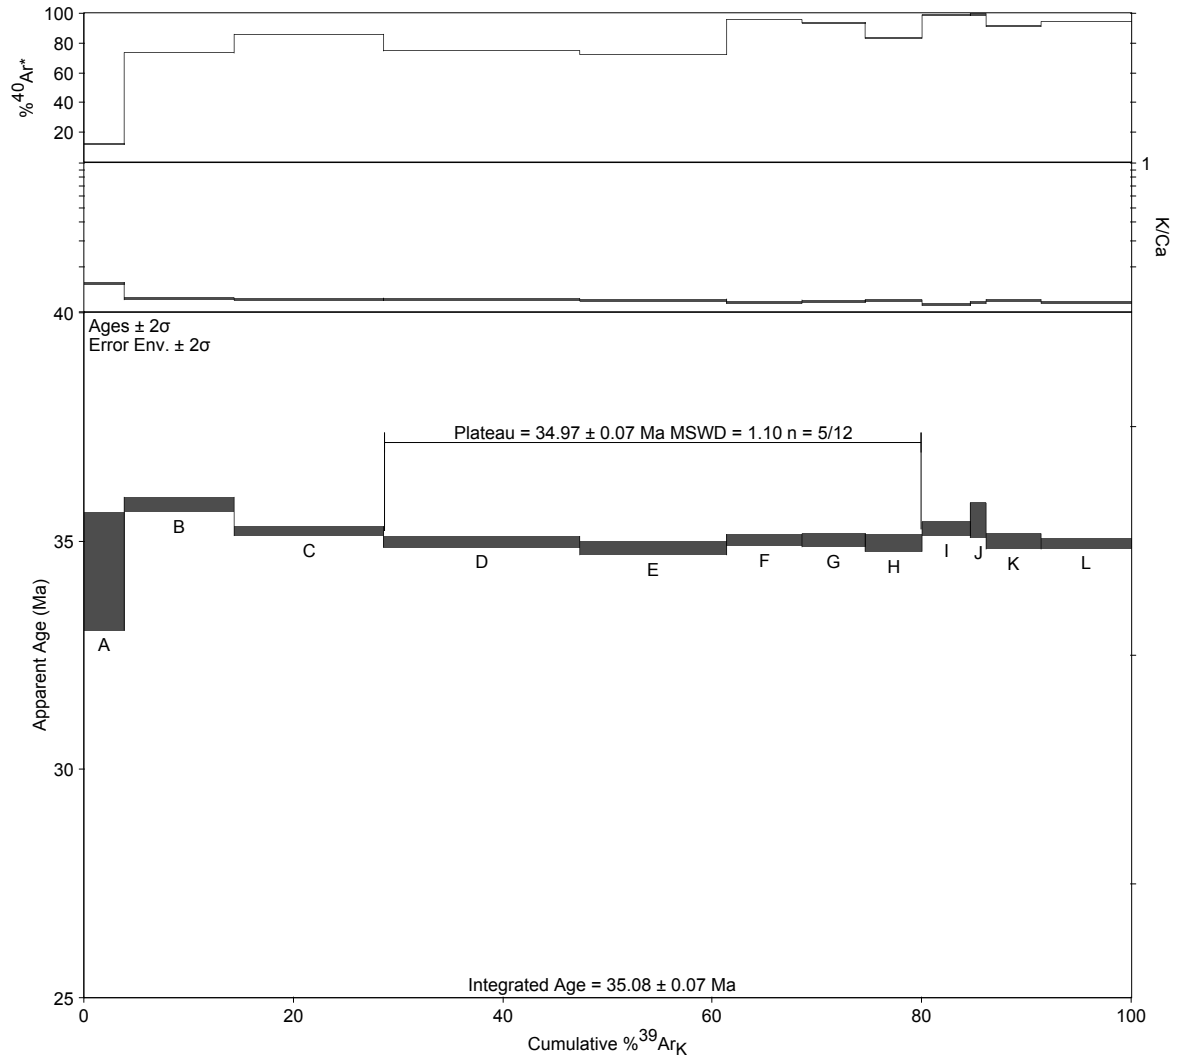

18L-11A 6729601

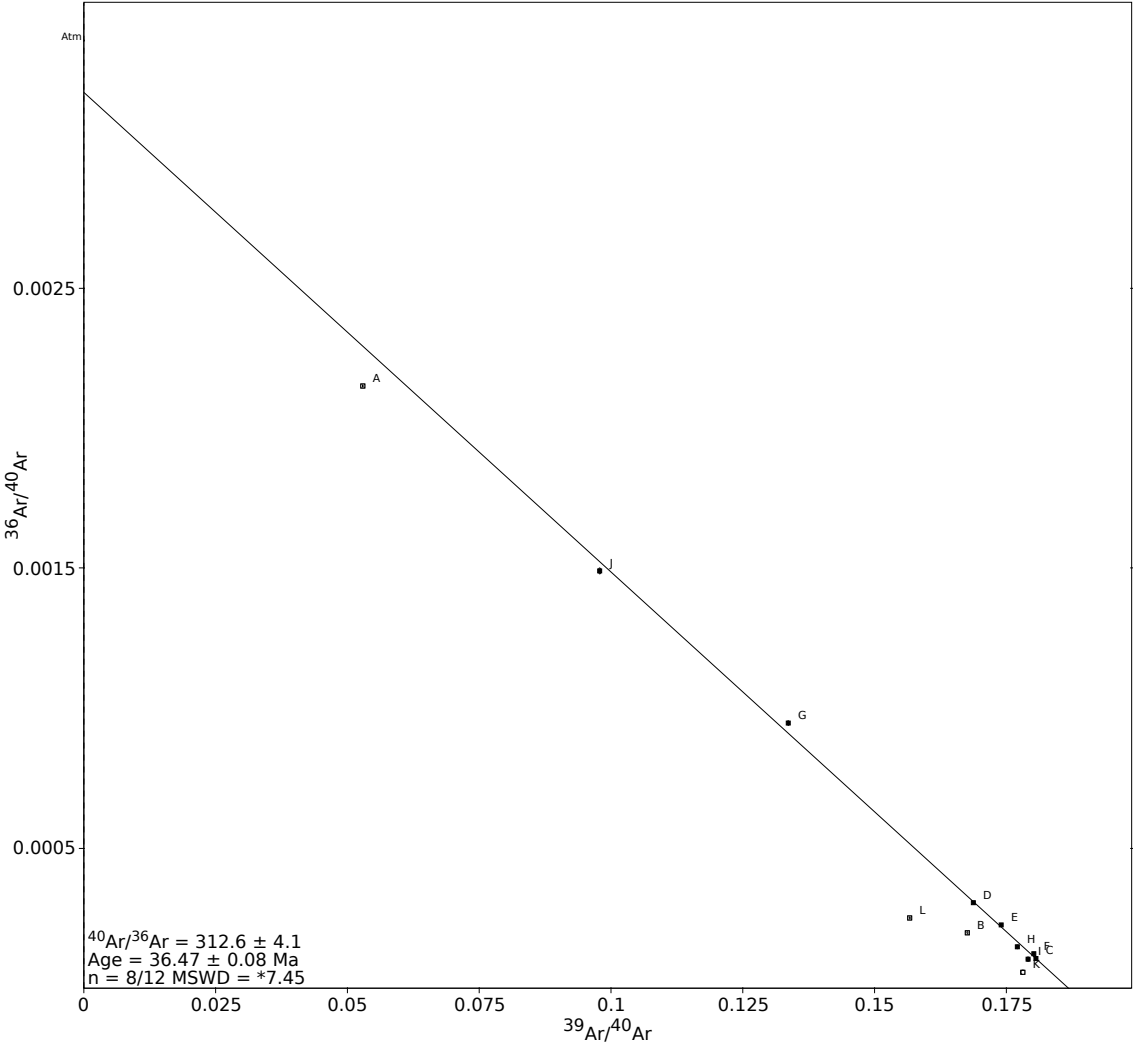

18L-11B 6785101

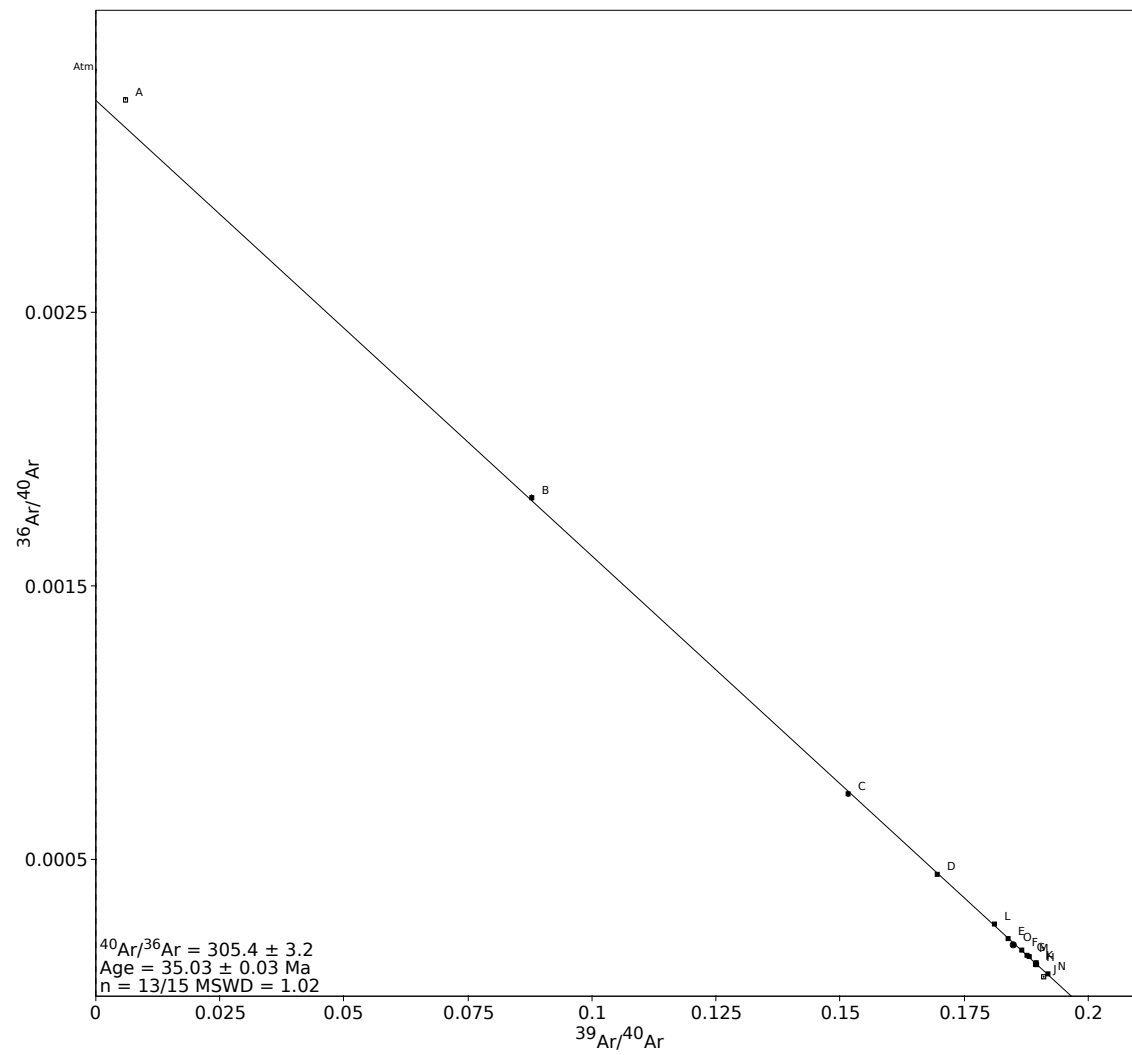

18L-11B(67852-01,Hornblende)

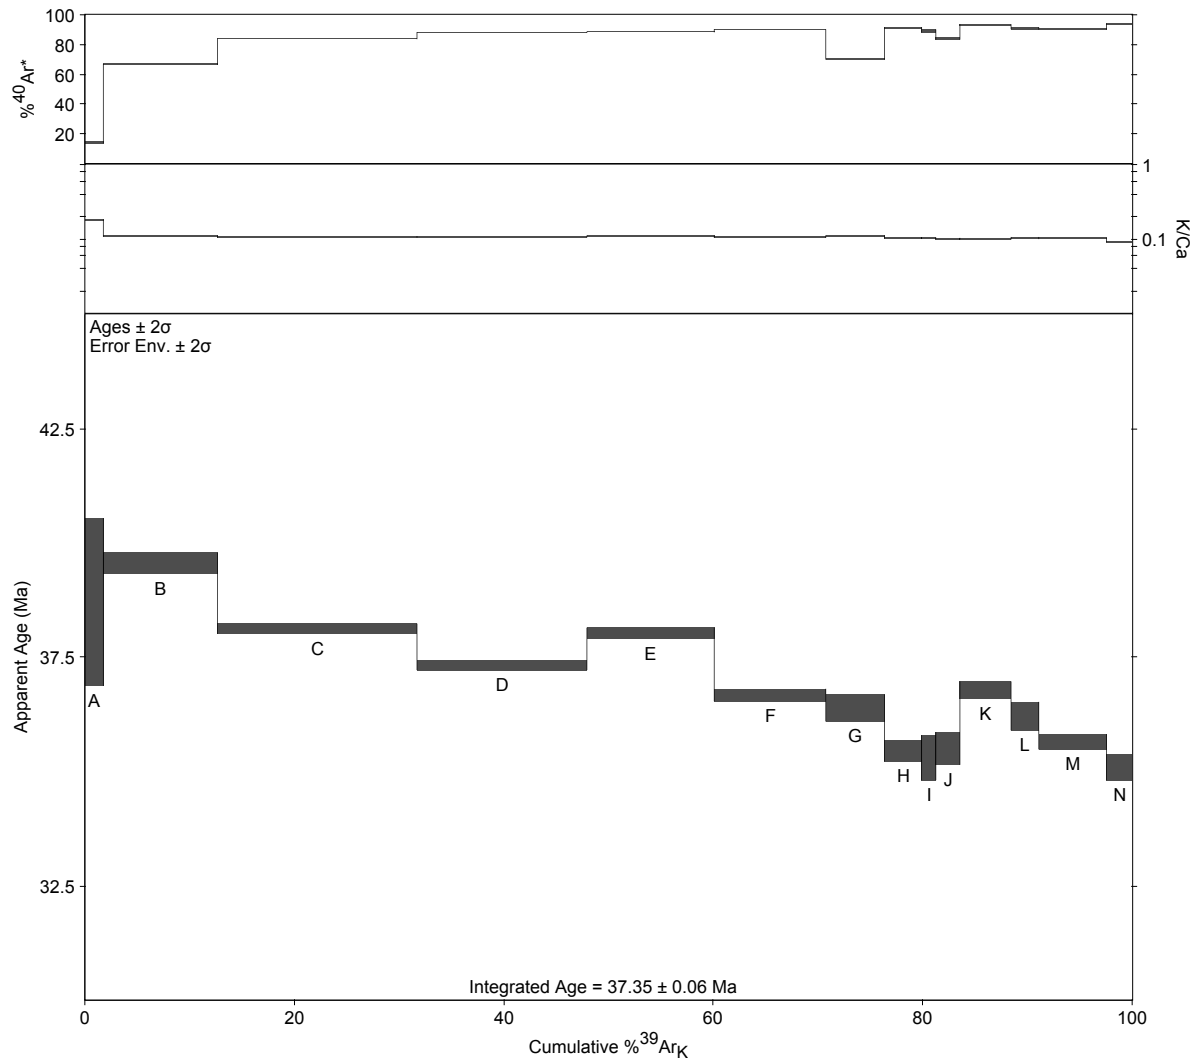



18L-07(66902-01,Biotite)

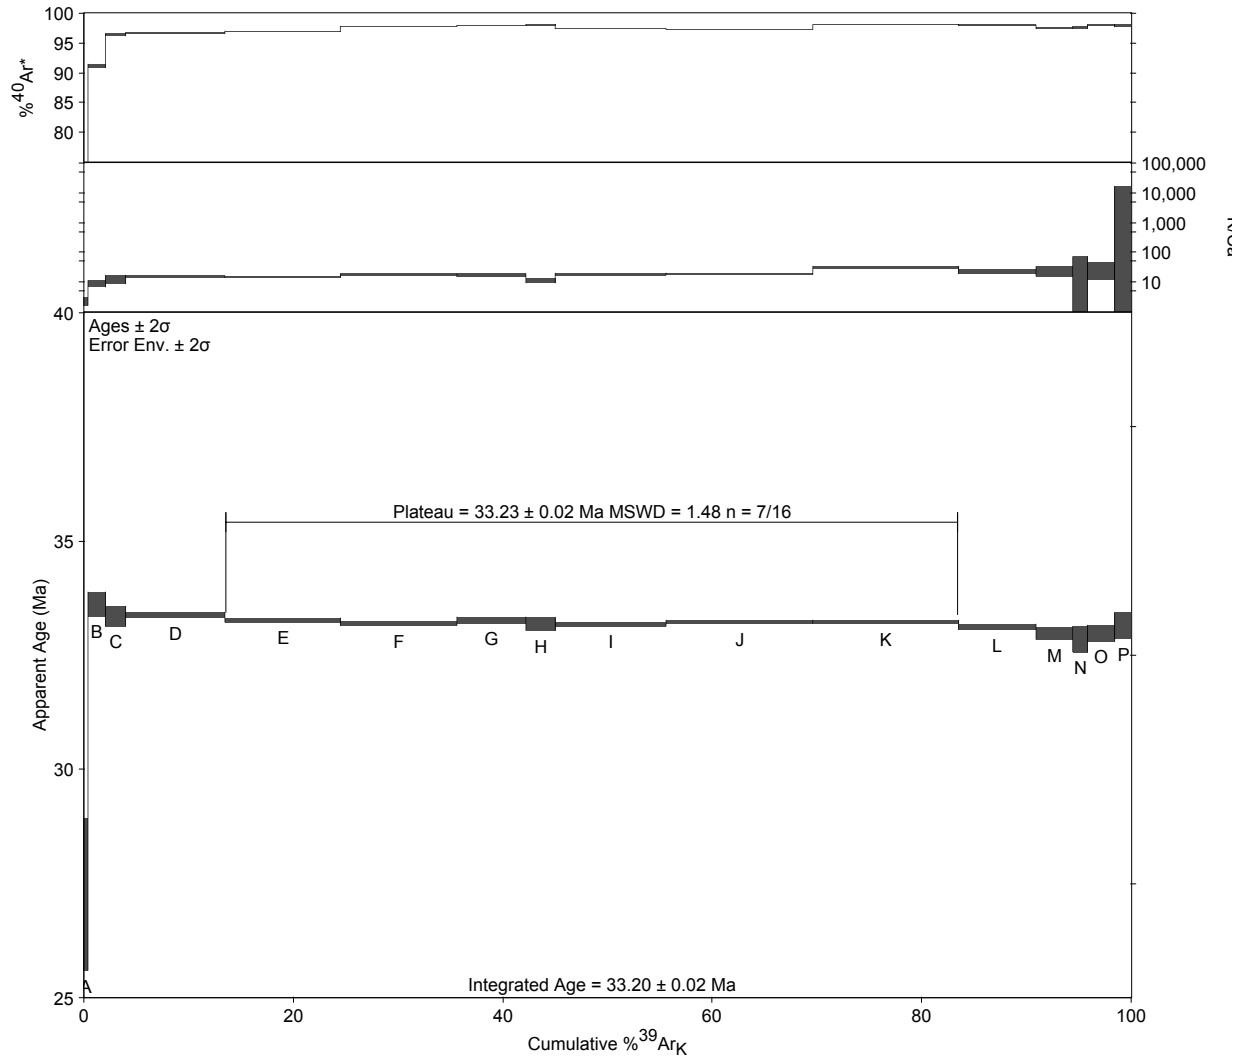

19L-5(67492-01,Biotite)

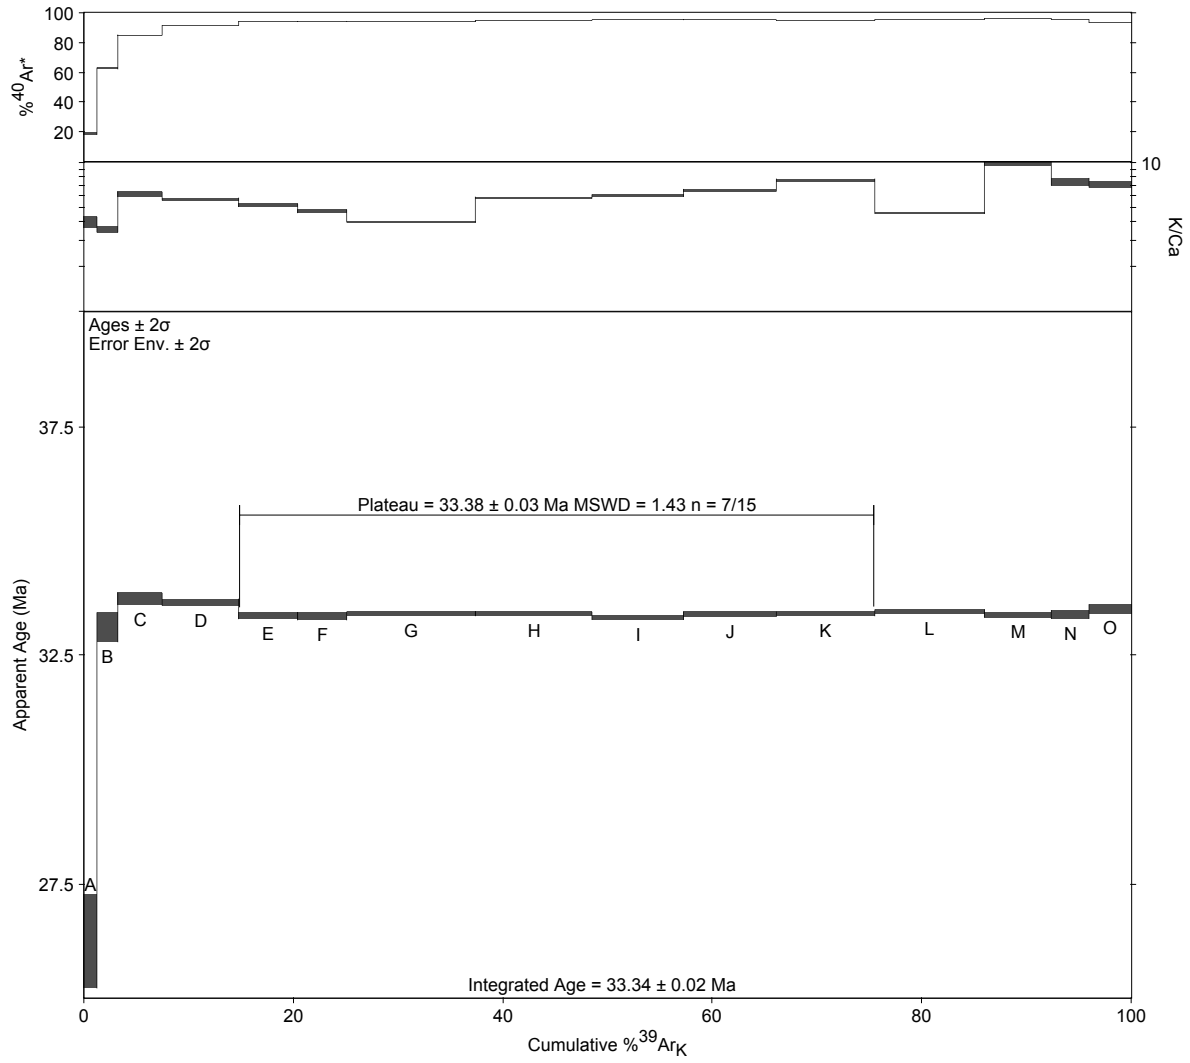

18L-8(67293-01,Hornblende)

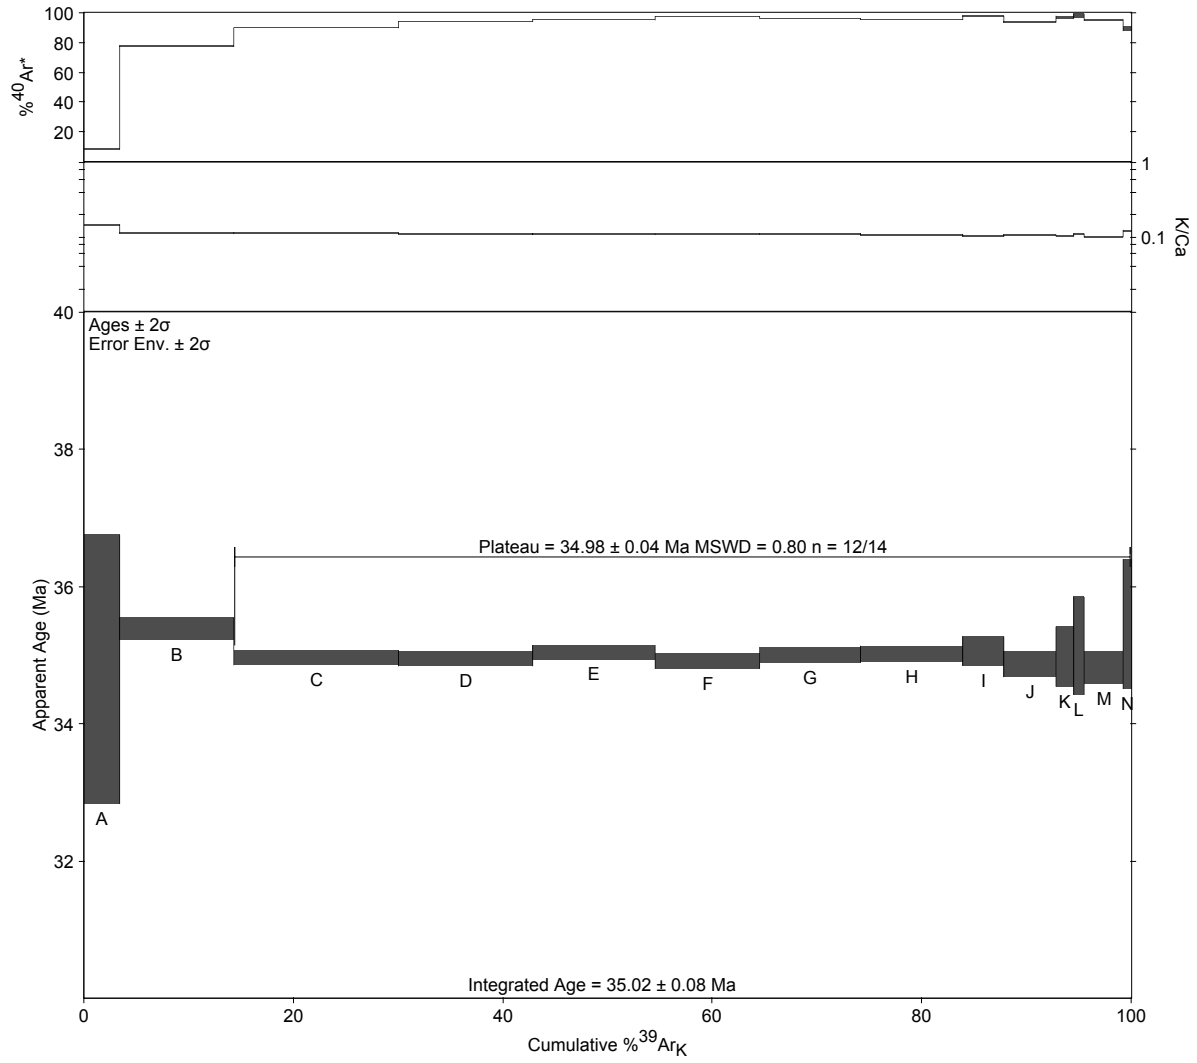

18L-15(67803-01,GroundmassConcentrate)

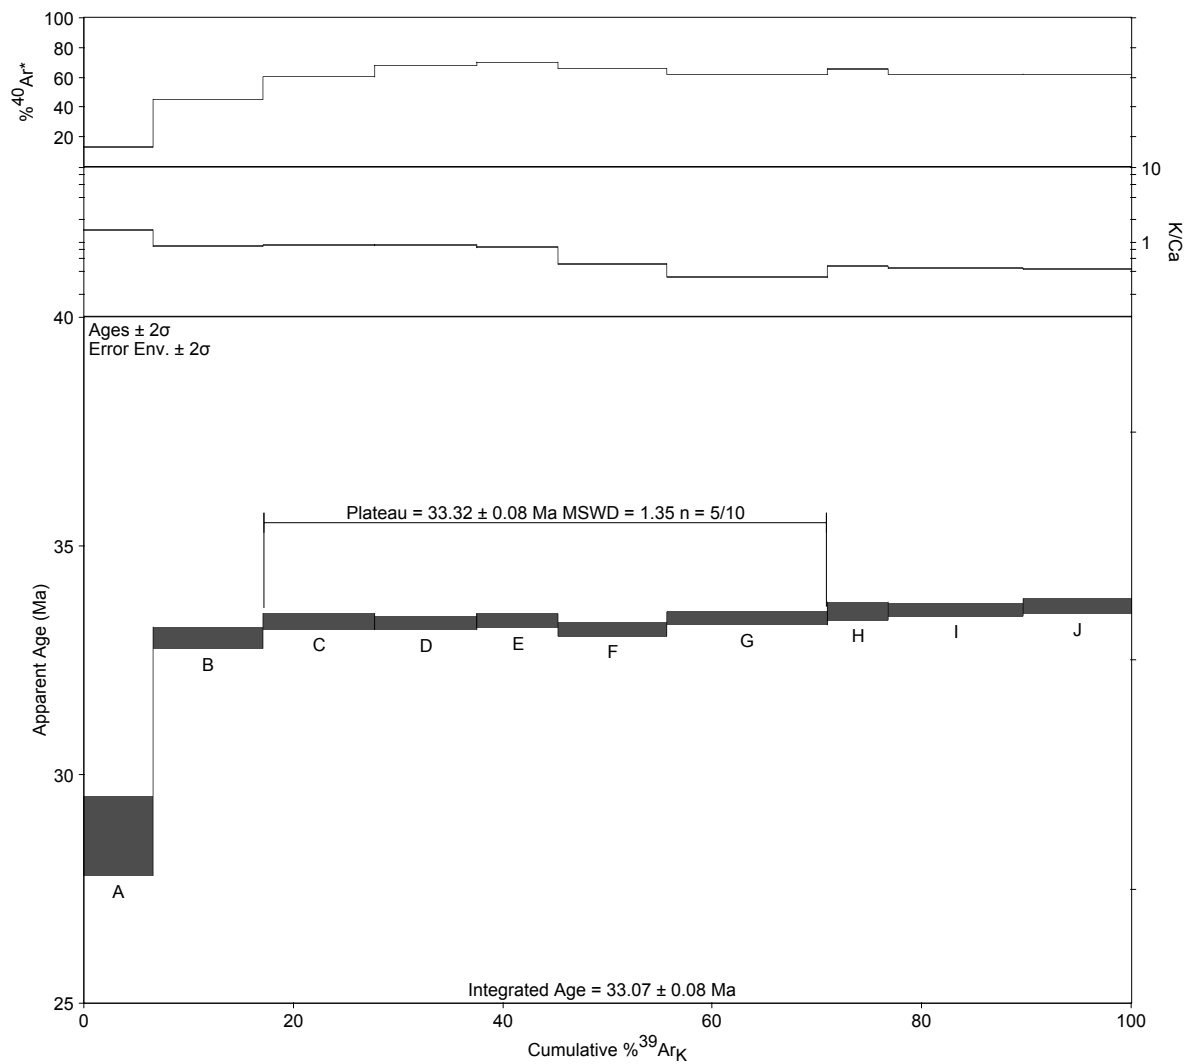

18L-6 6729201

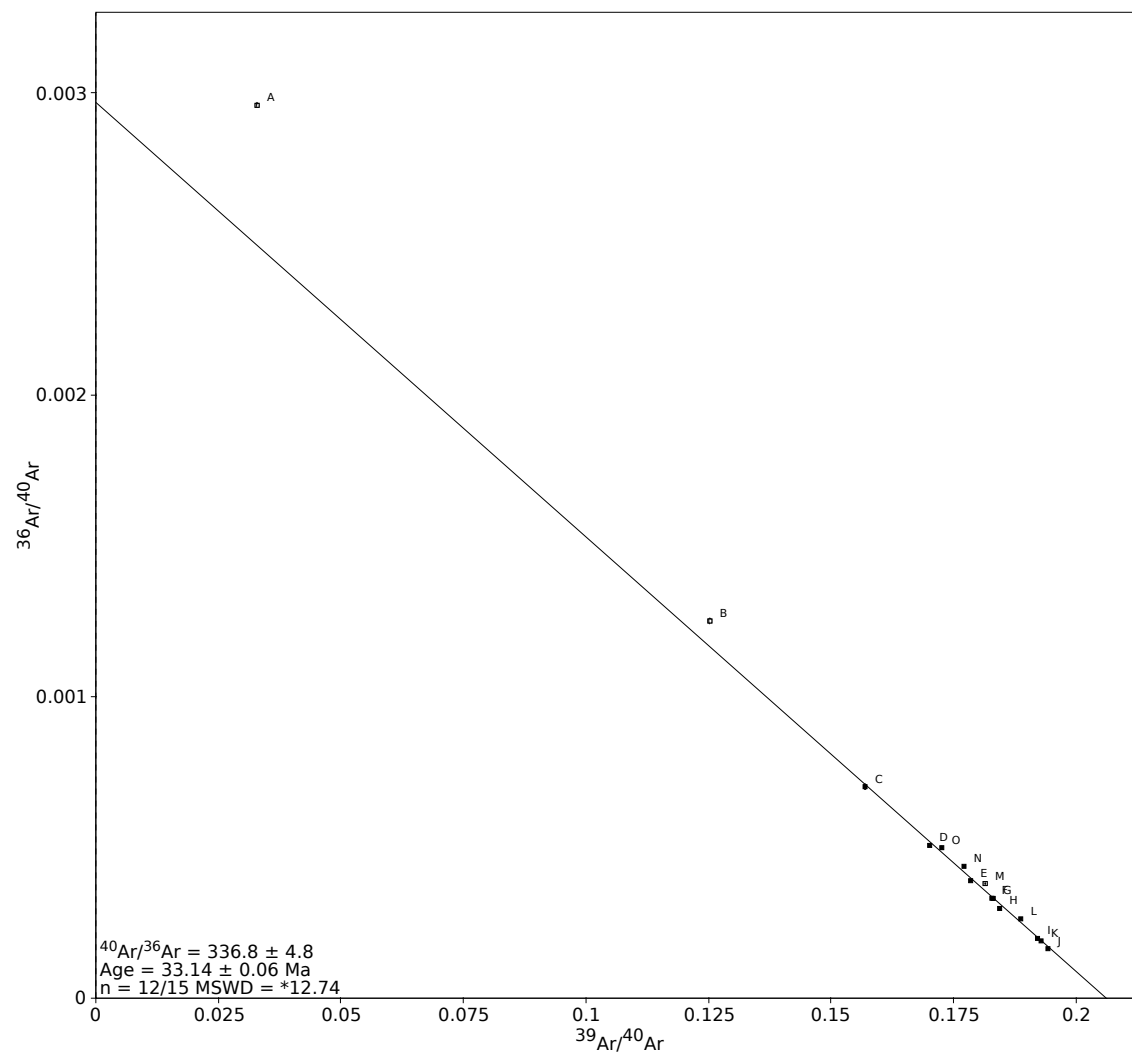

18L-1 6729001

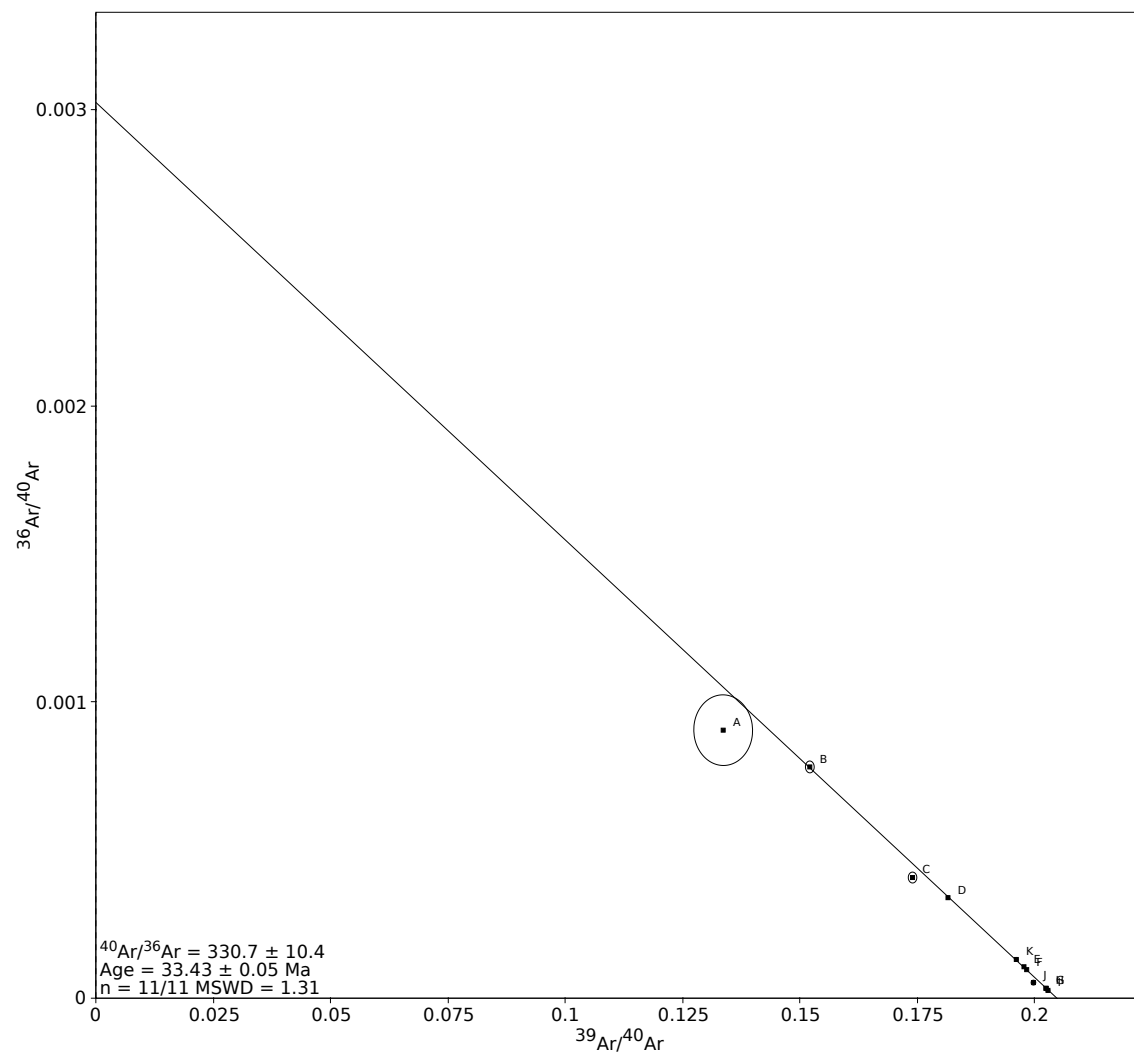

19L-2(67298-01,Biotite)

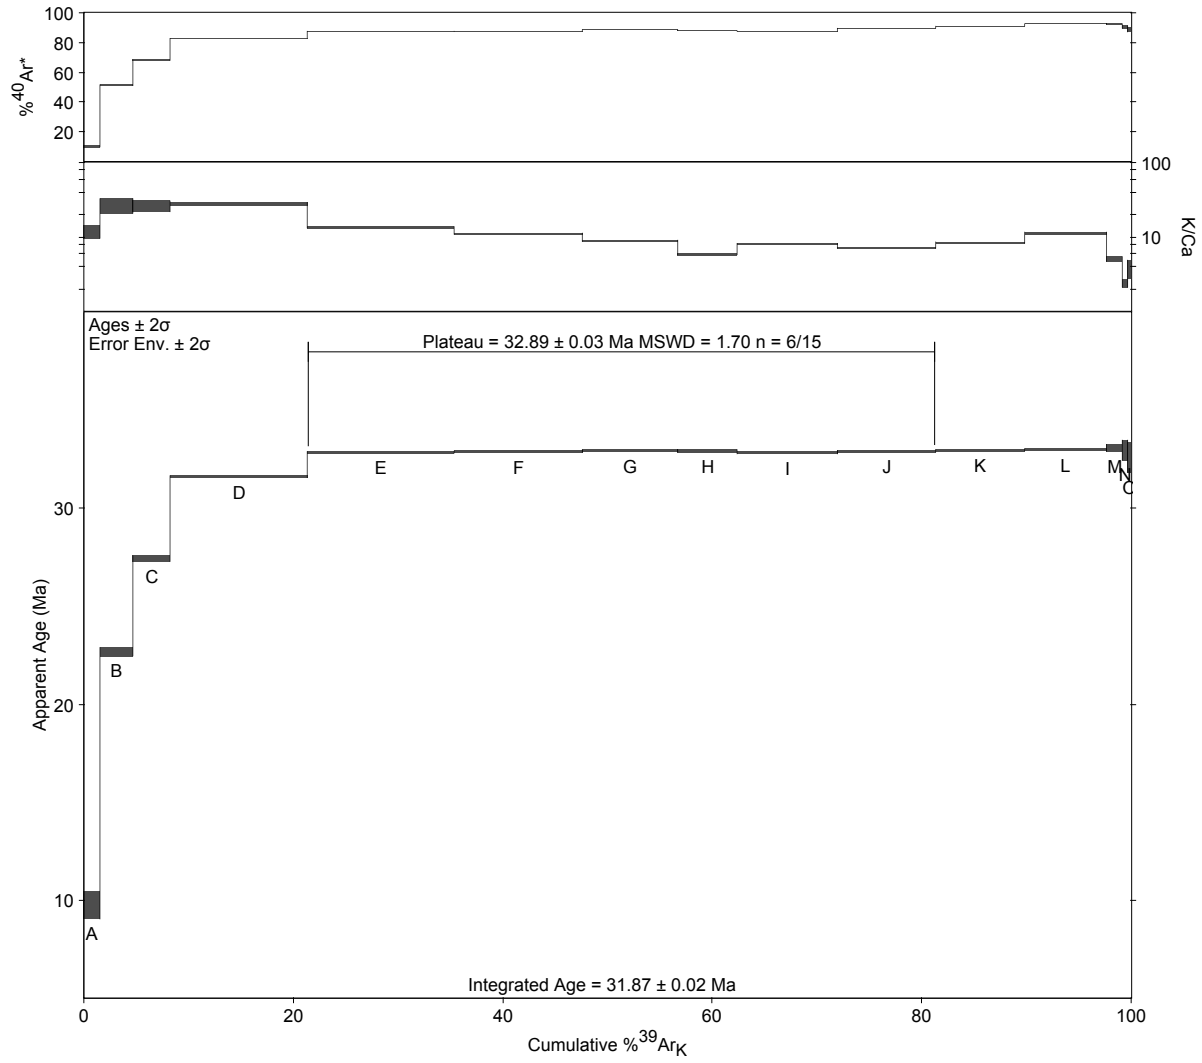

19L-3(67491-01,Biotite)

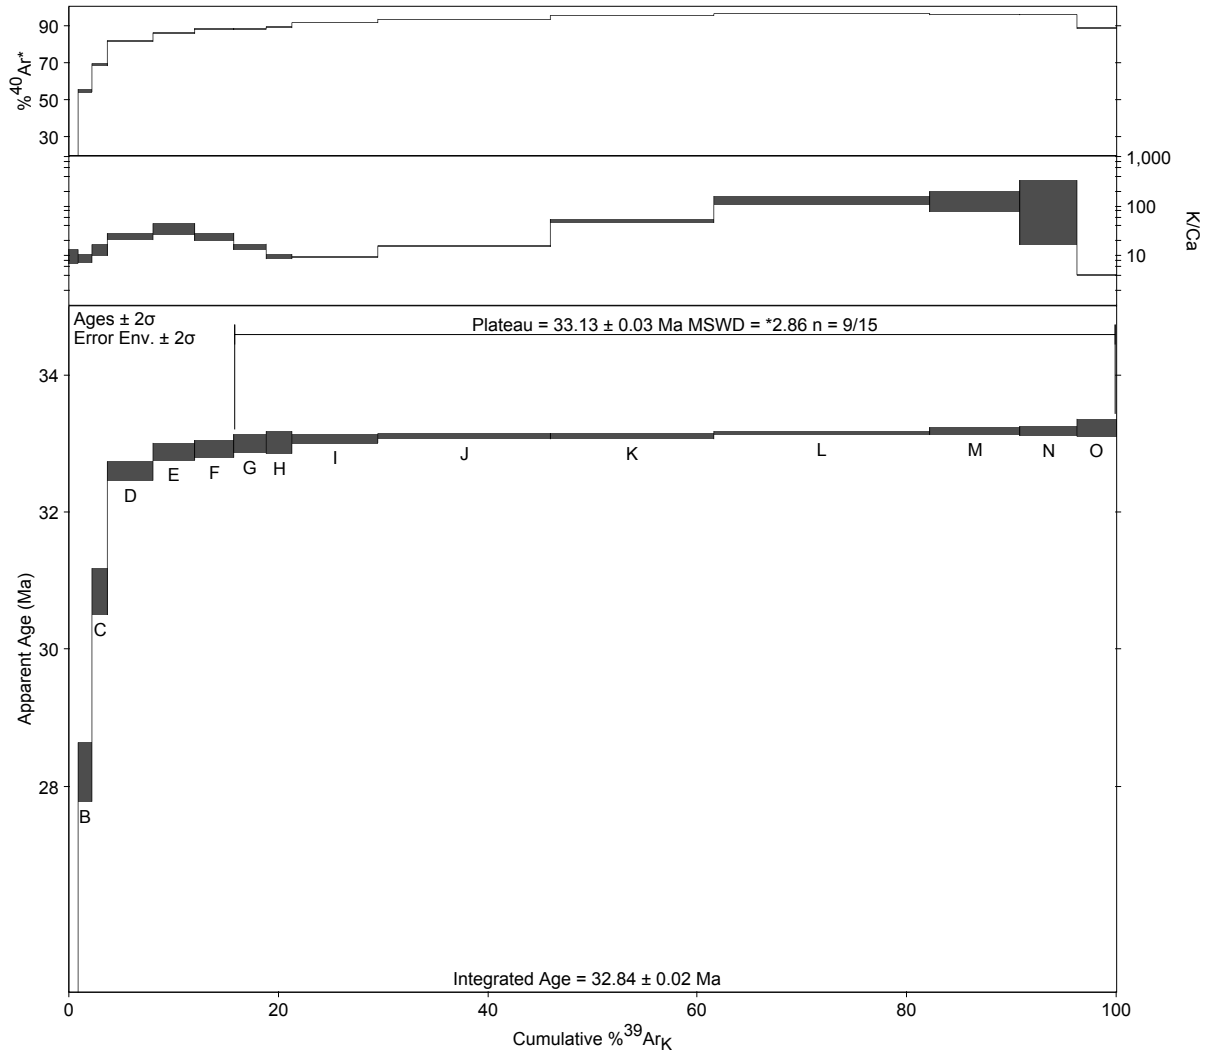



17L-18(66467)

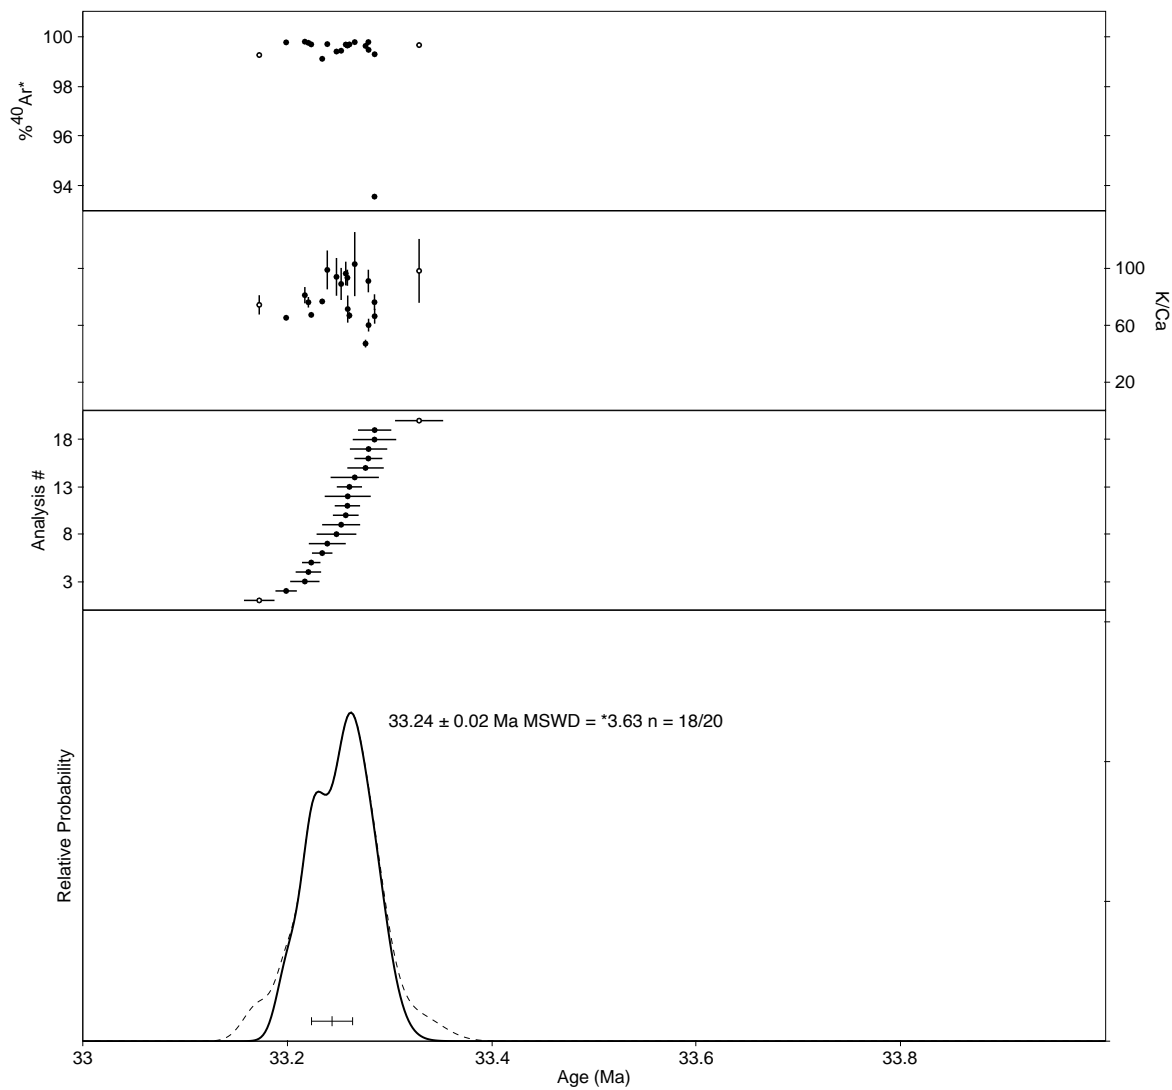

17L-17(67810-01,Biotite)

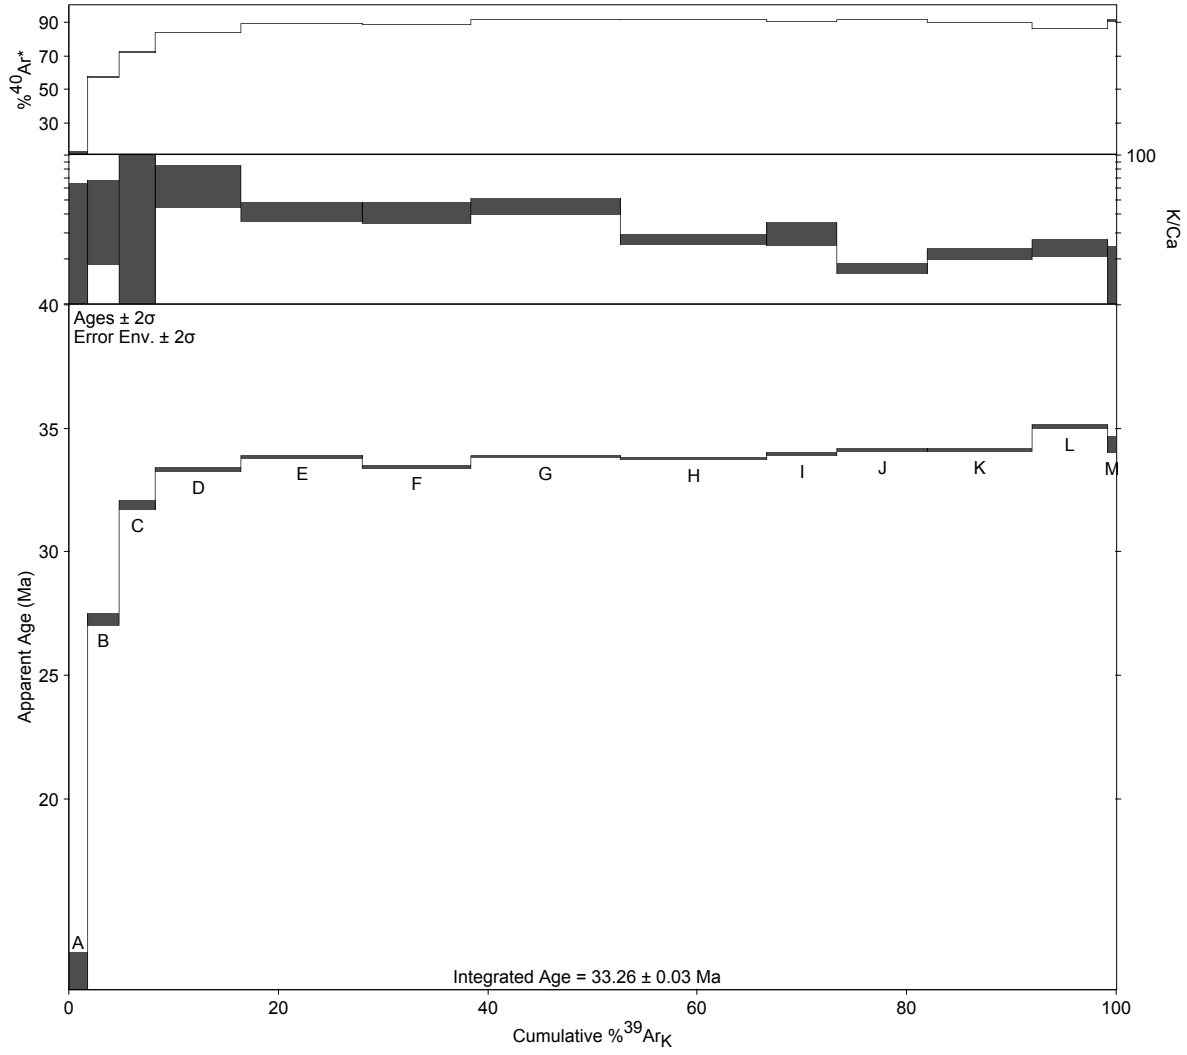

17L-17 6781101

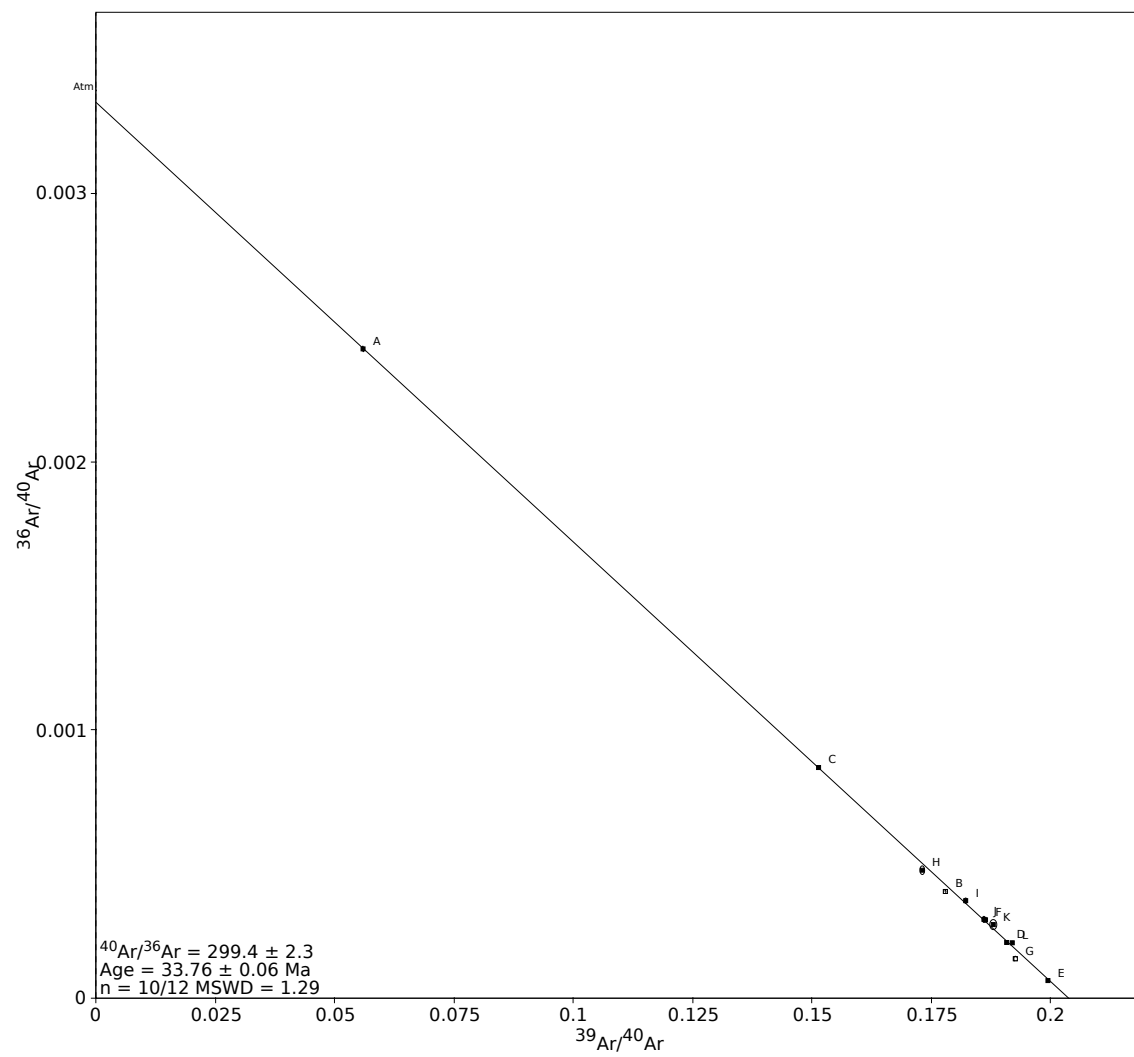

18L-04(66903)

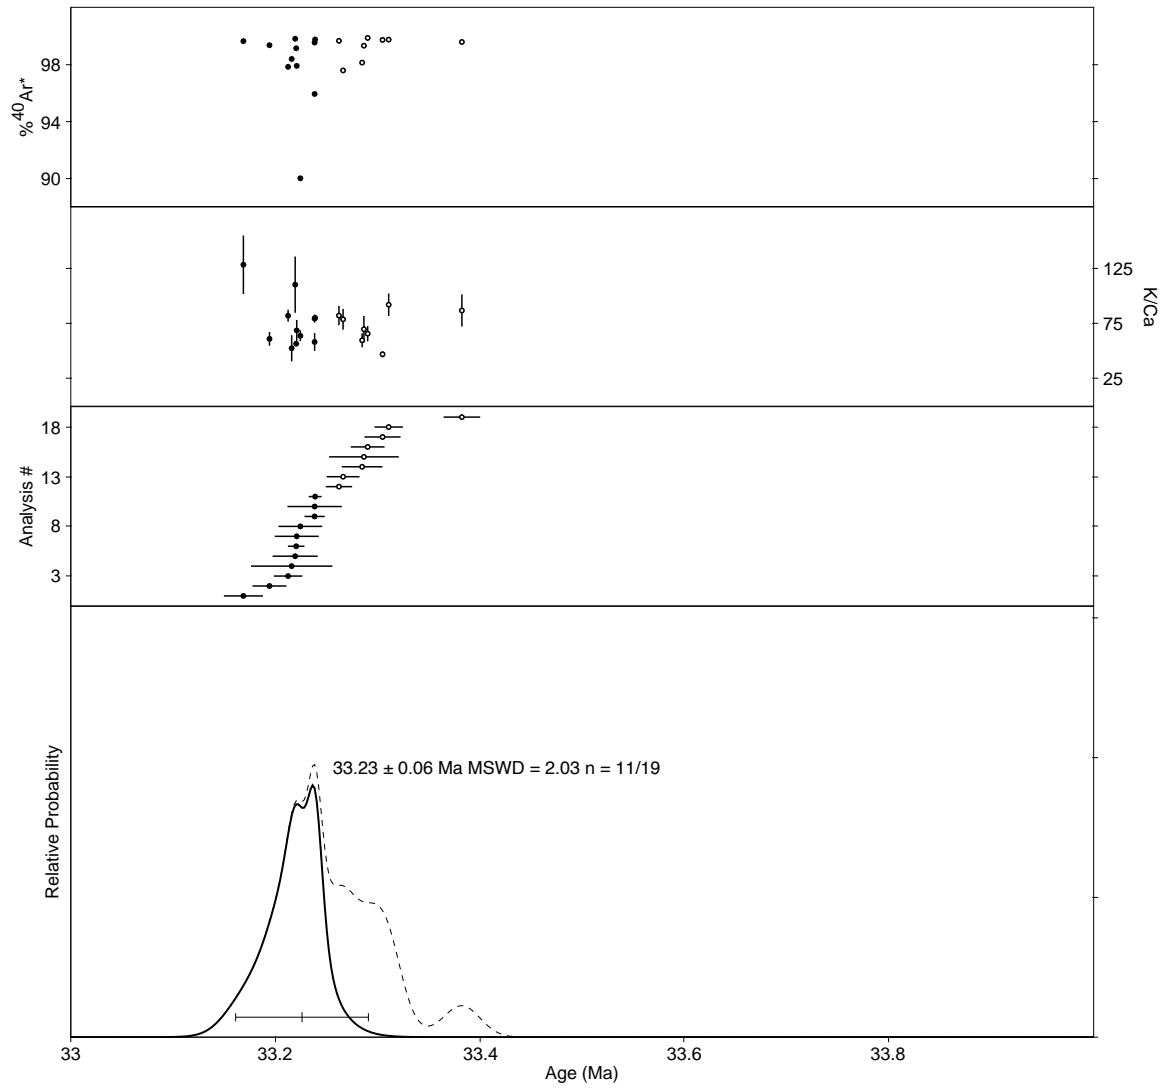

18L-03(66904)

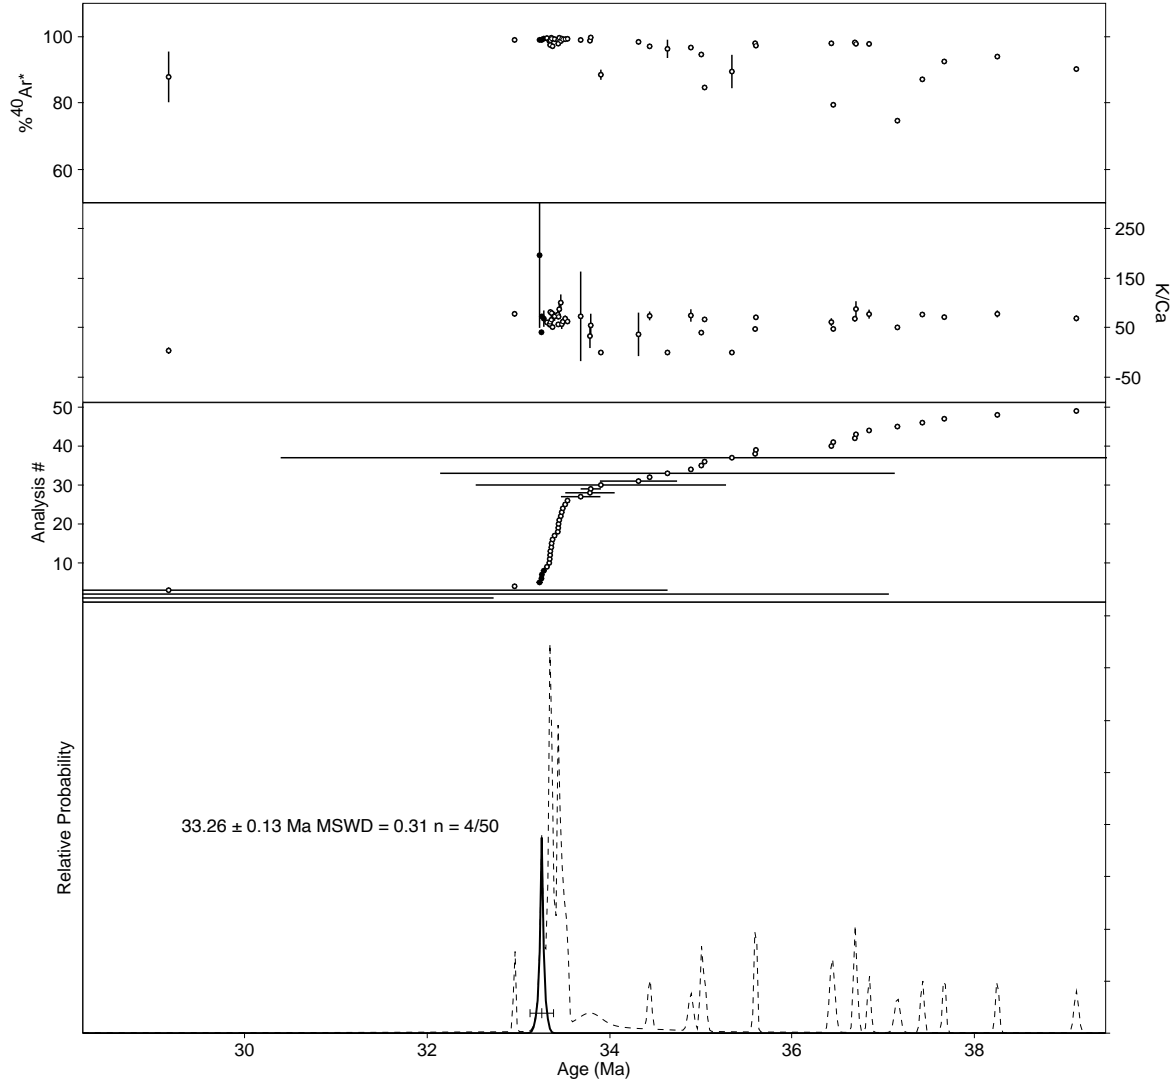

18L-2 6729101

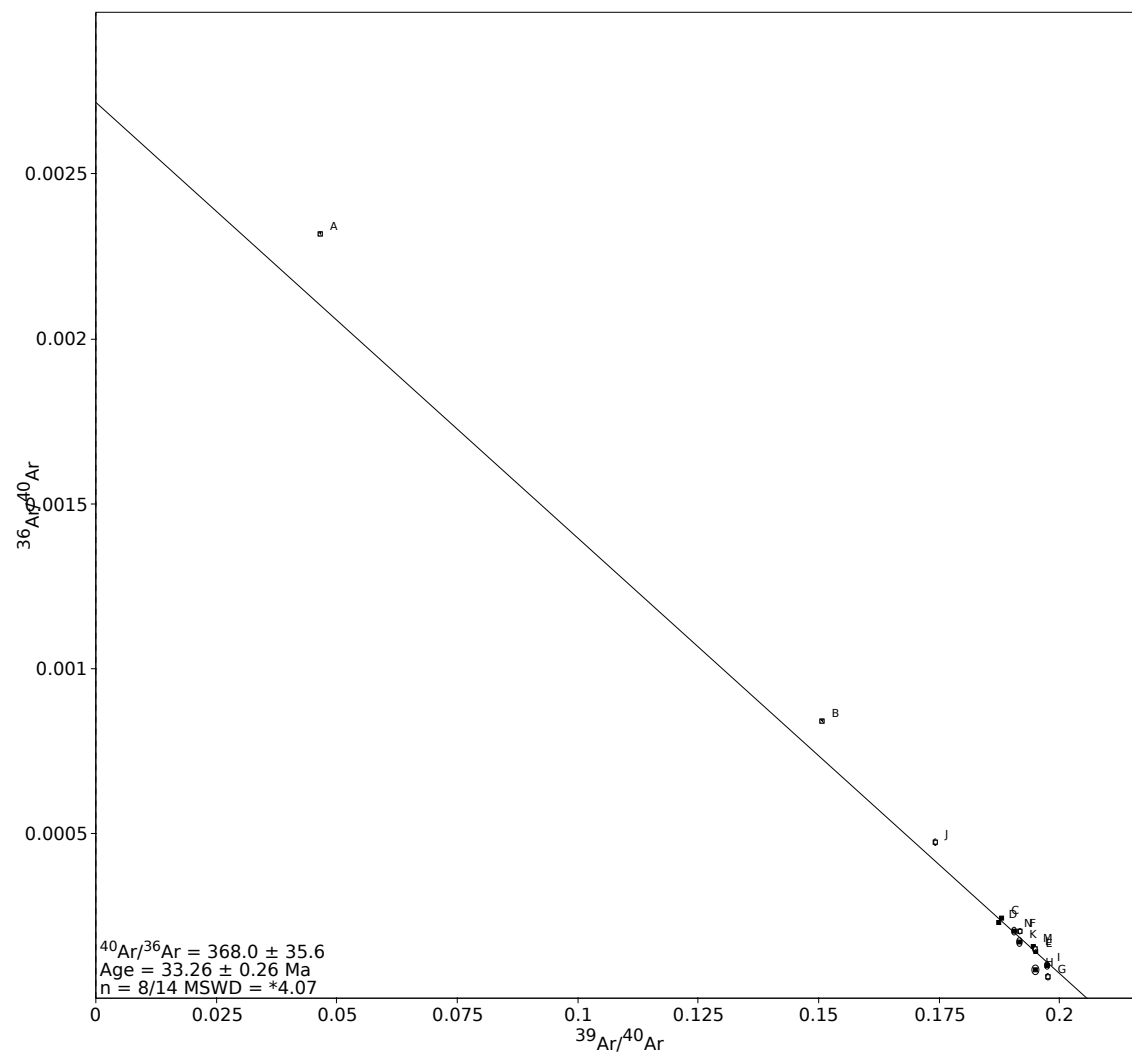

18L-05(66901-01,Biotite)

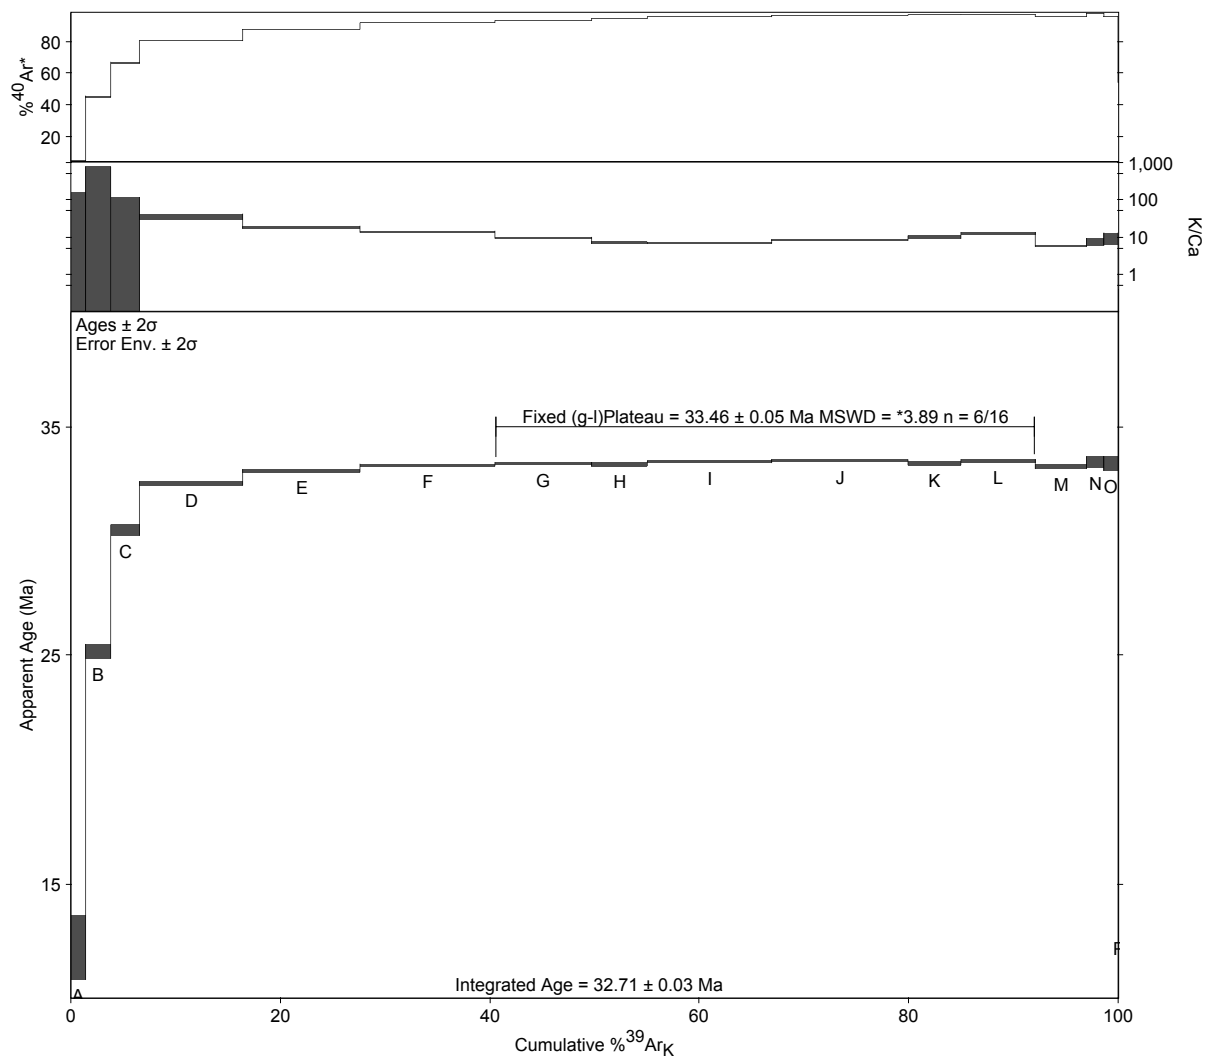

17L-21(66468)

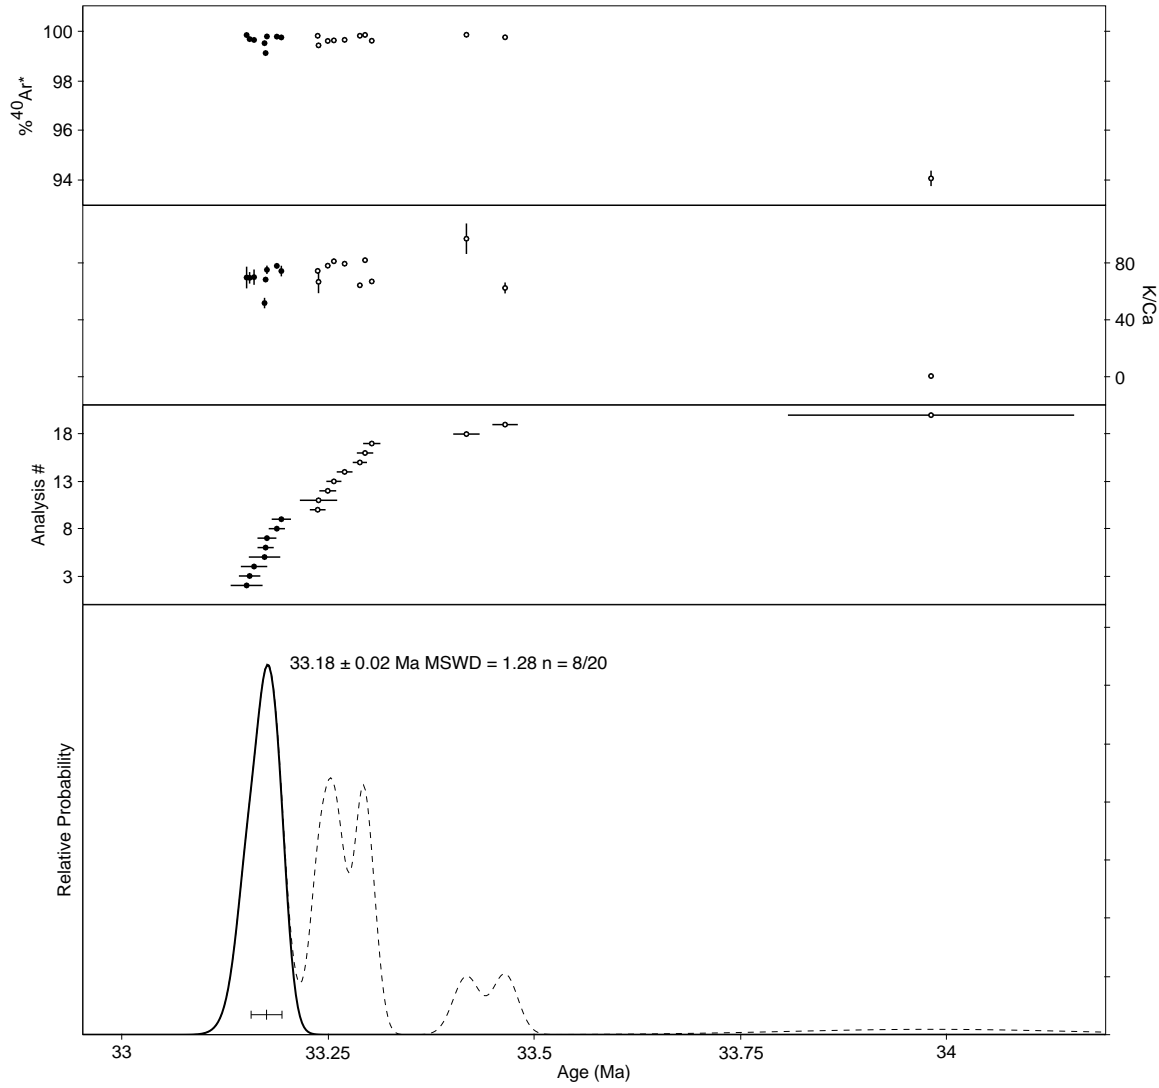



17L-15(66466)

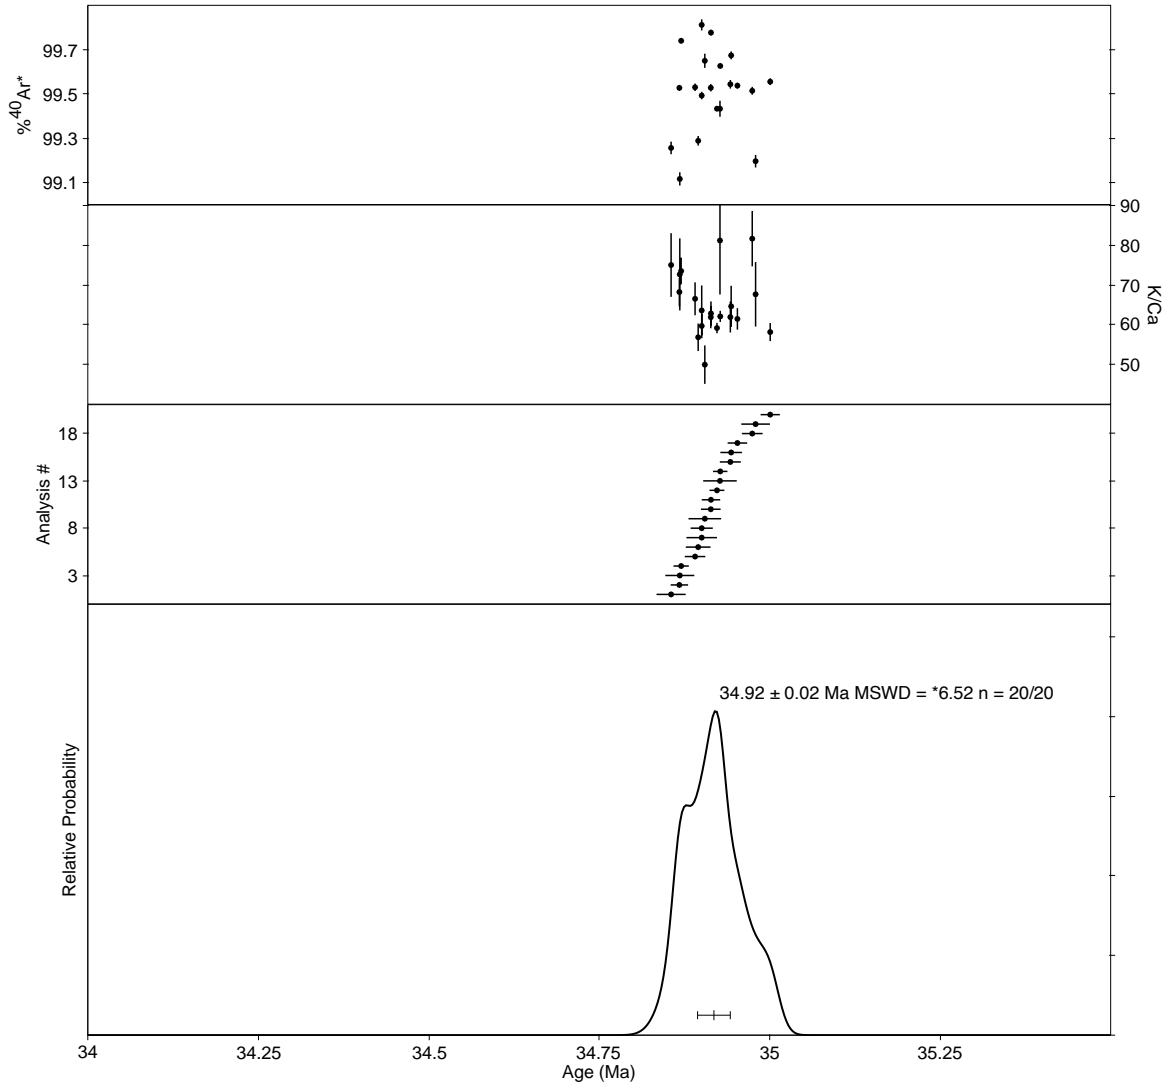

17L-22(66469)

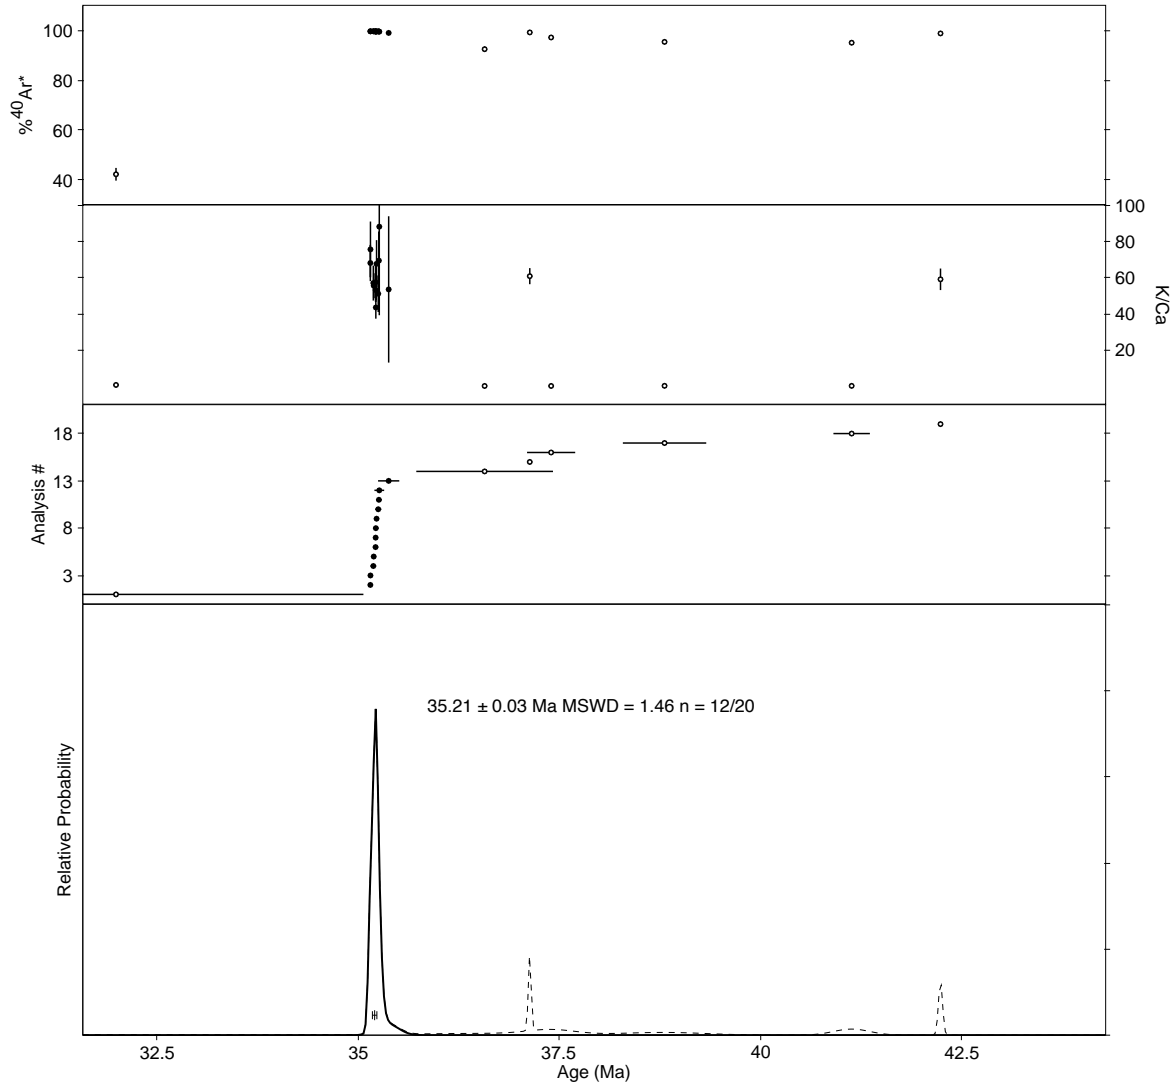

18L-25(67490-01,Biotite)

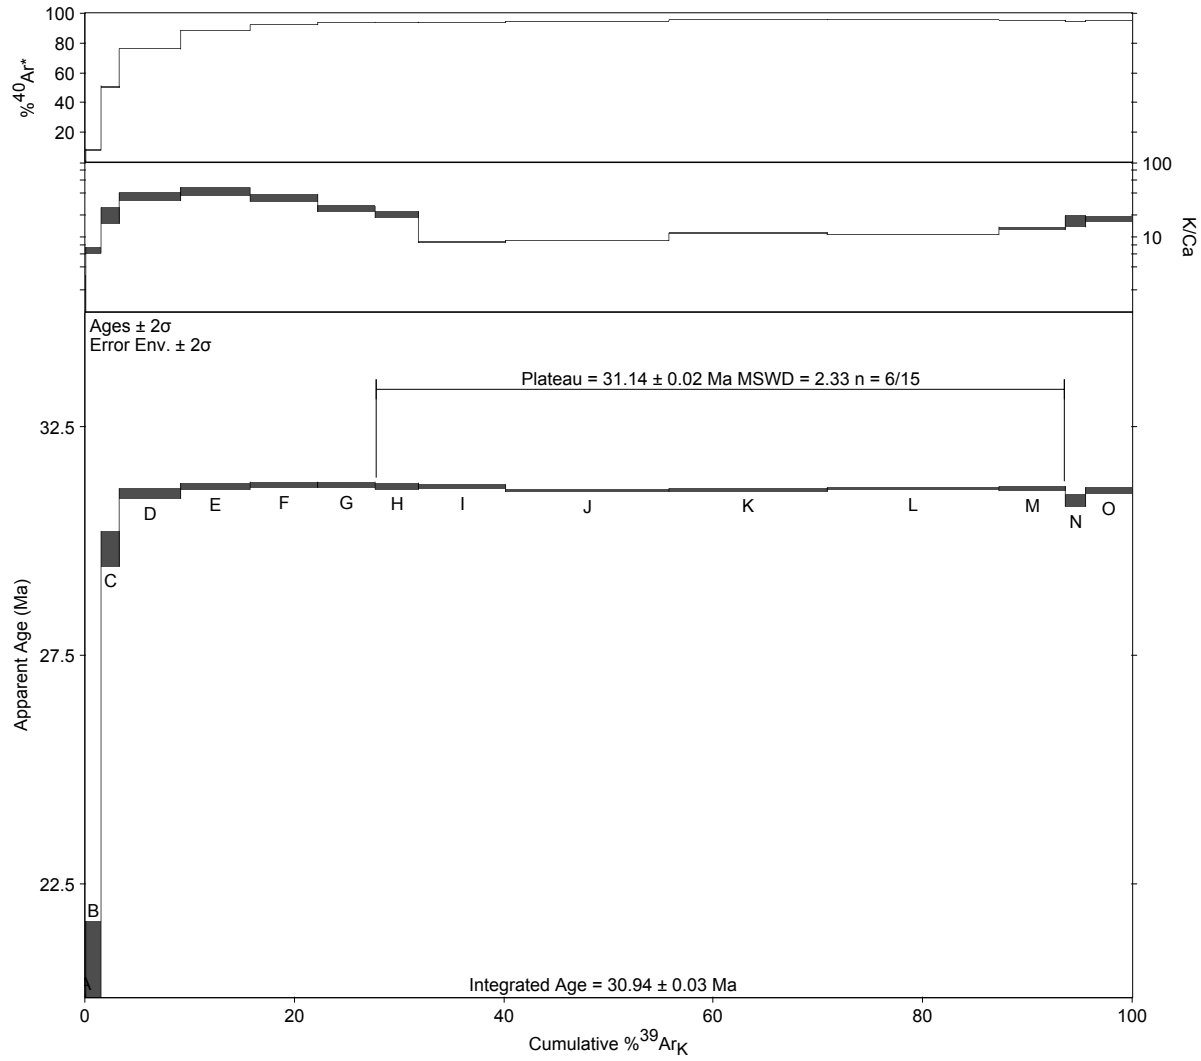

18L-25(67850-01,Biotite)

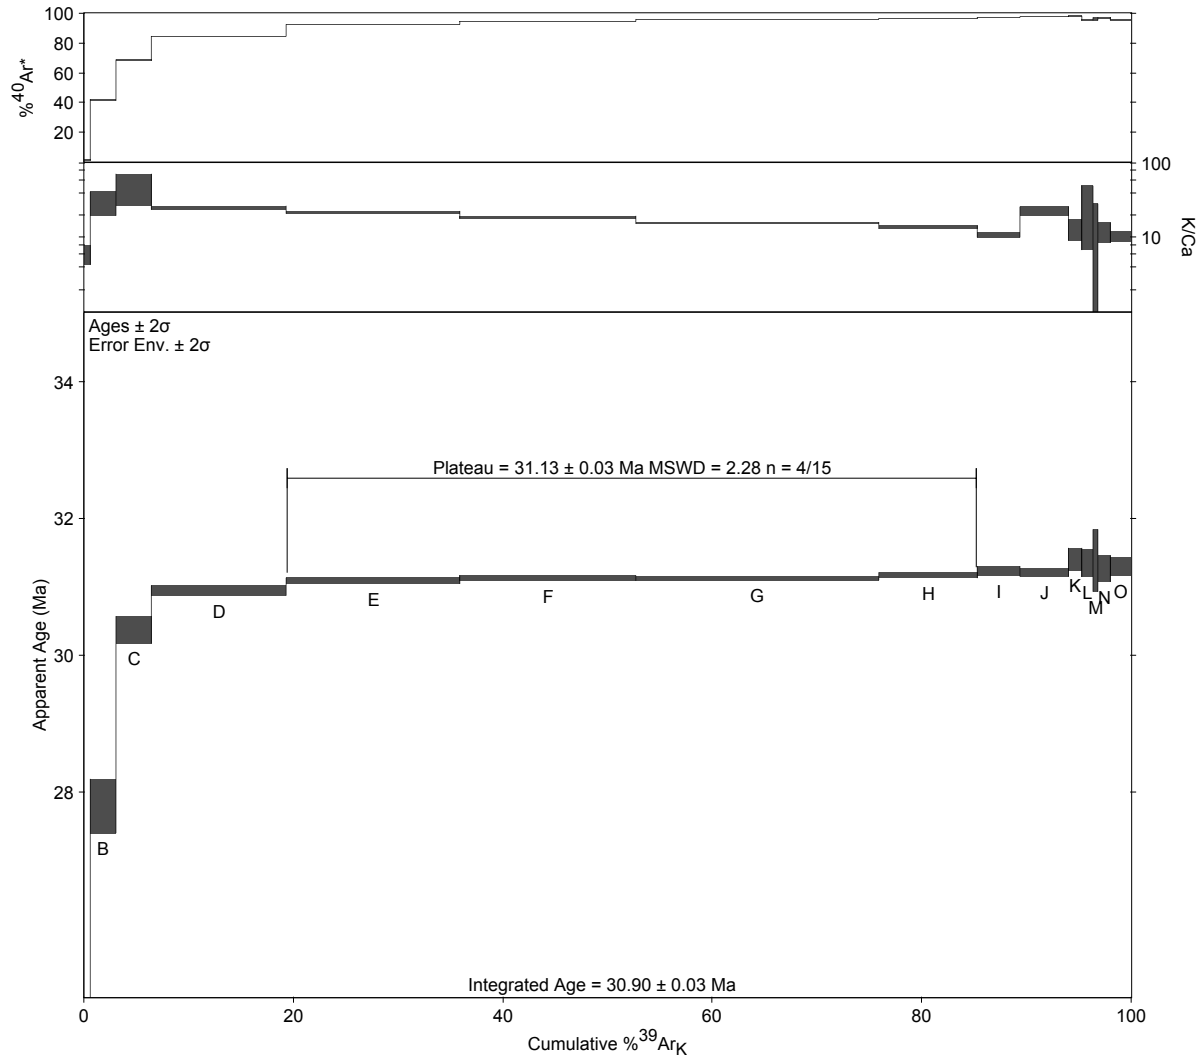

18L-20 6730201

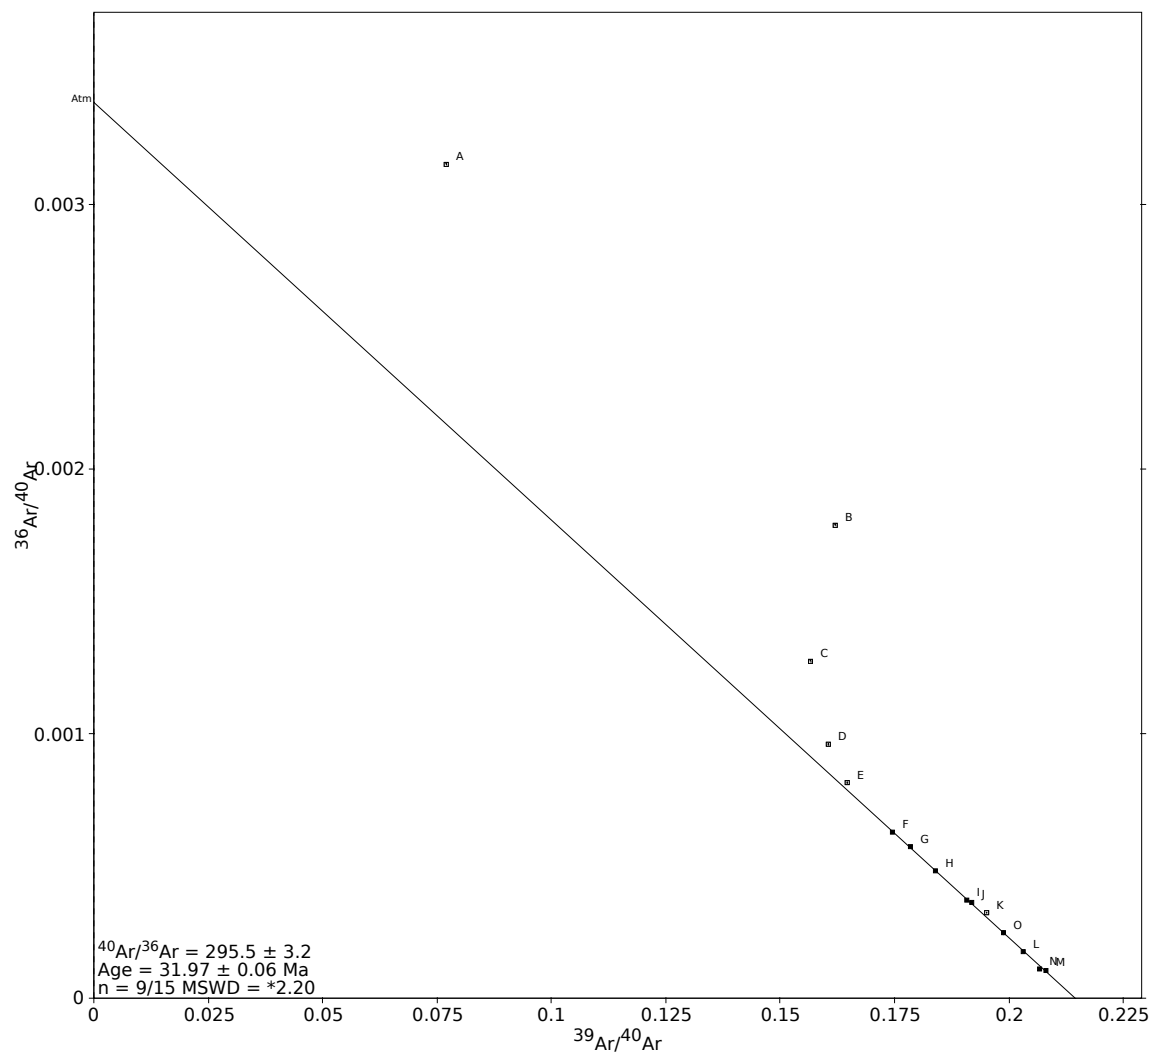

19L-12 6730001

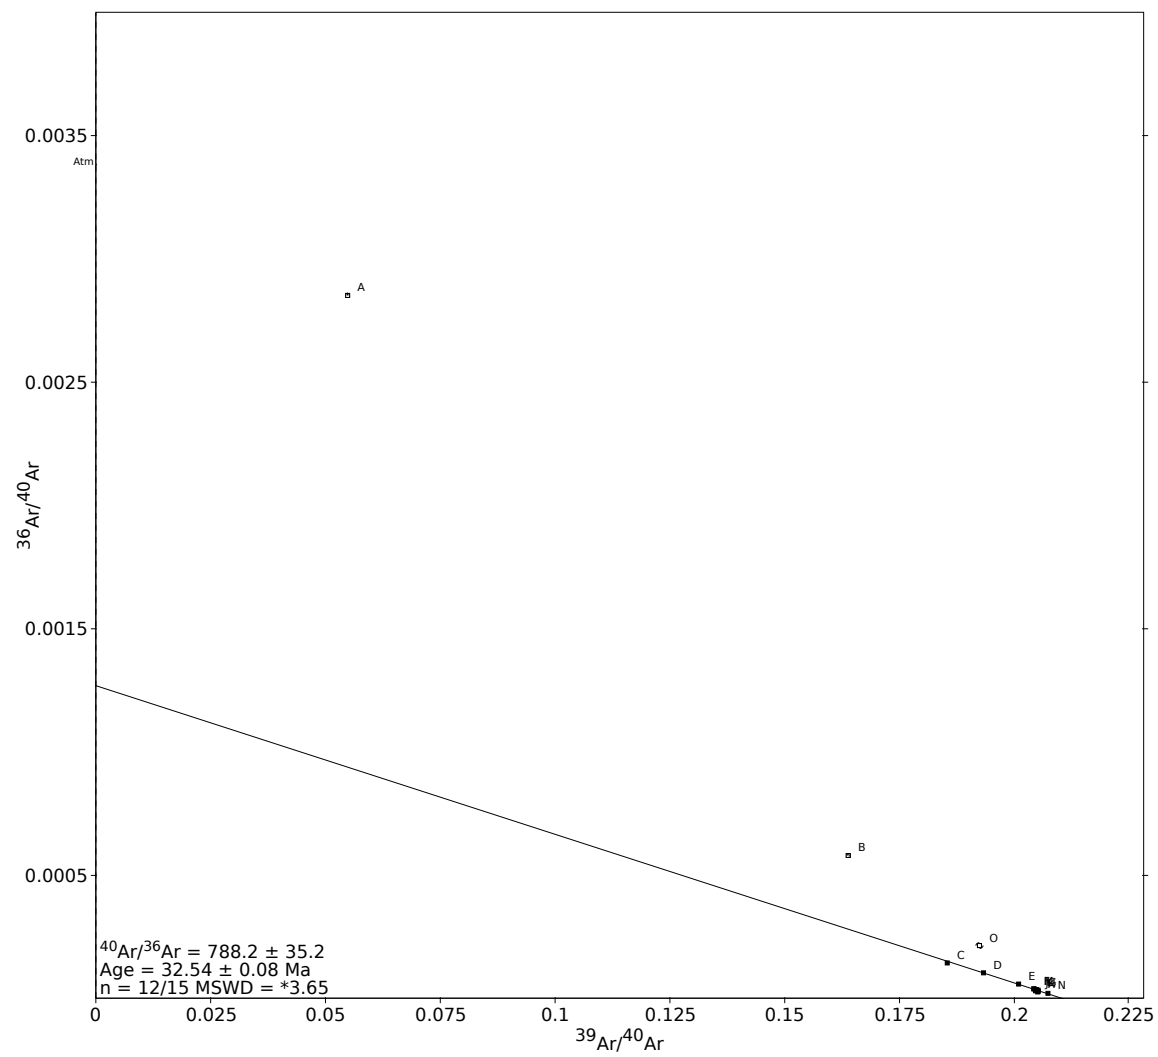

18L-21(67489-01,Biotite)

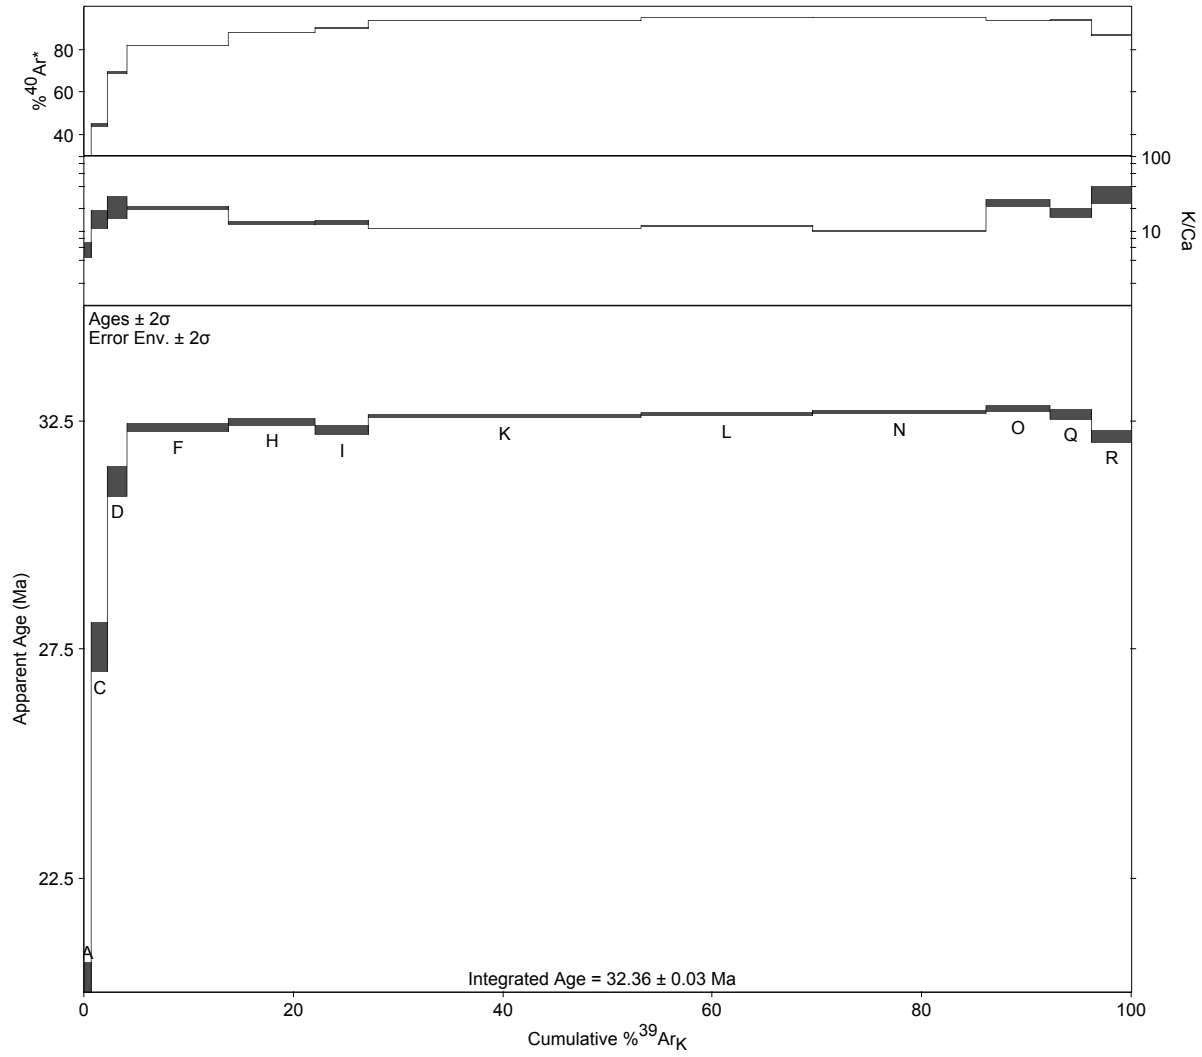

BGMN-03 6953501

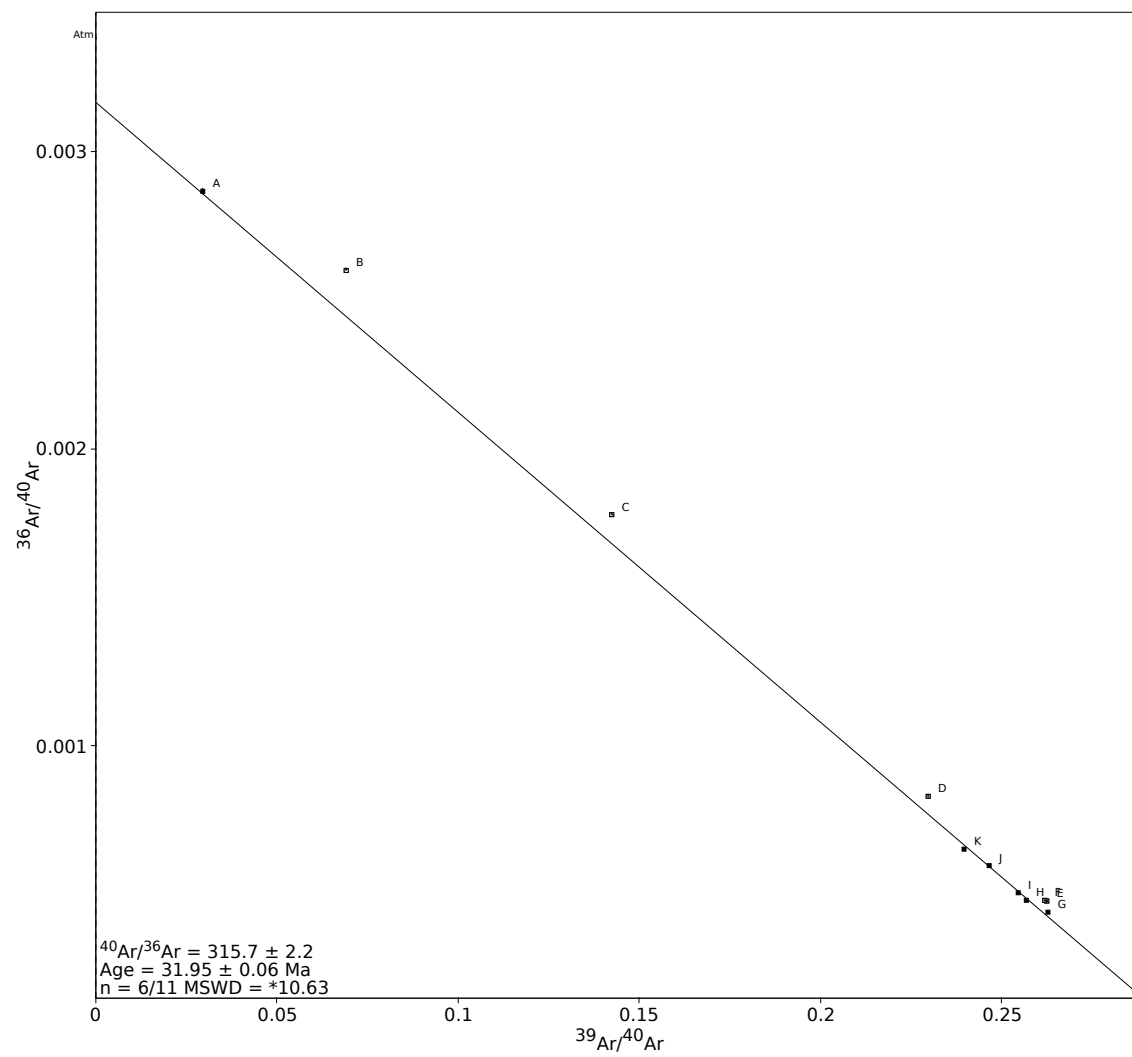



19L-15(67855-01,GroundmassConcentrate)

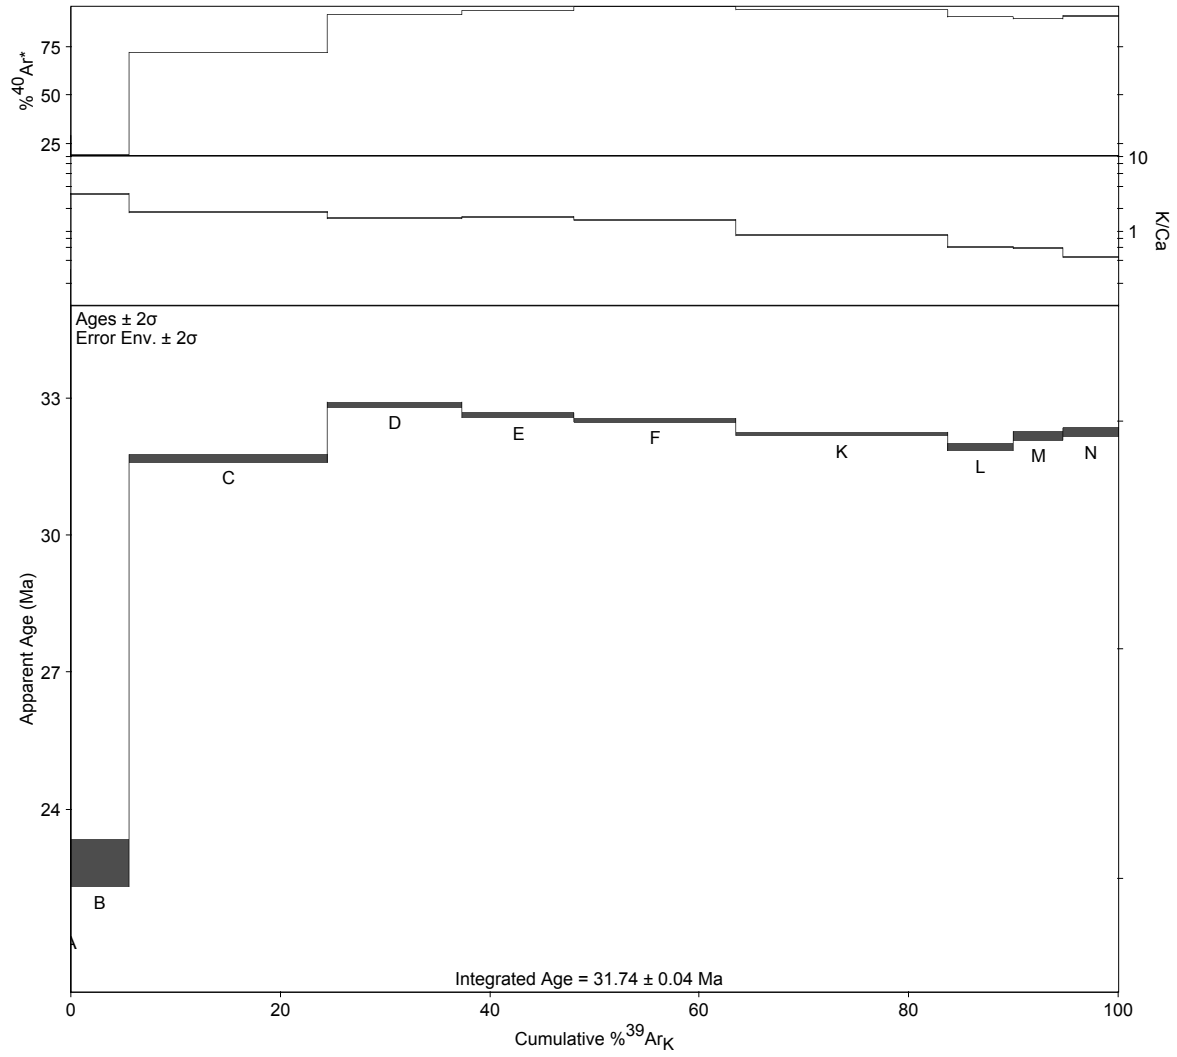

19L-14 6749501

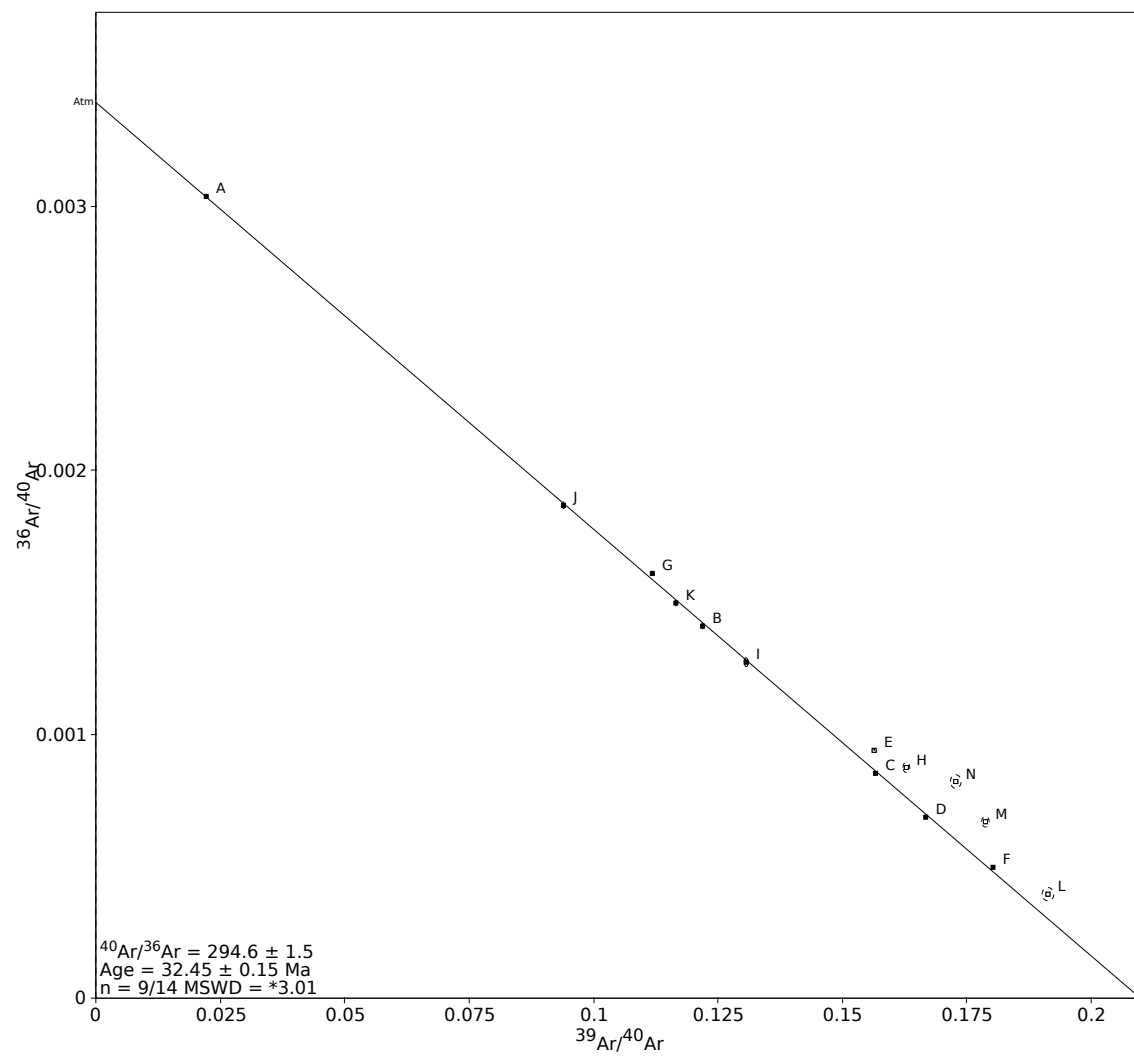

19L-16(67857-01,GroundmassConcentrate)

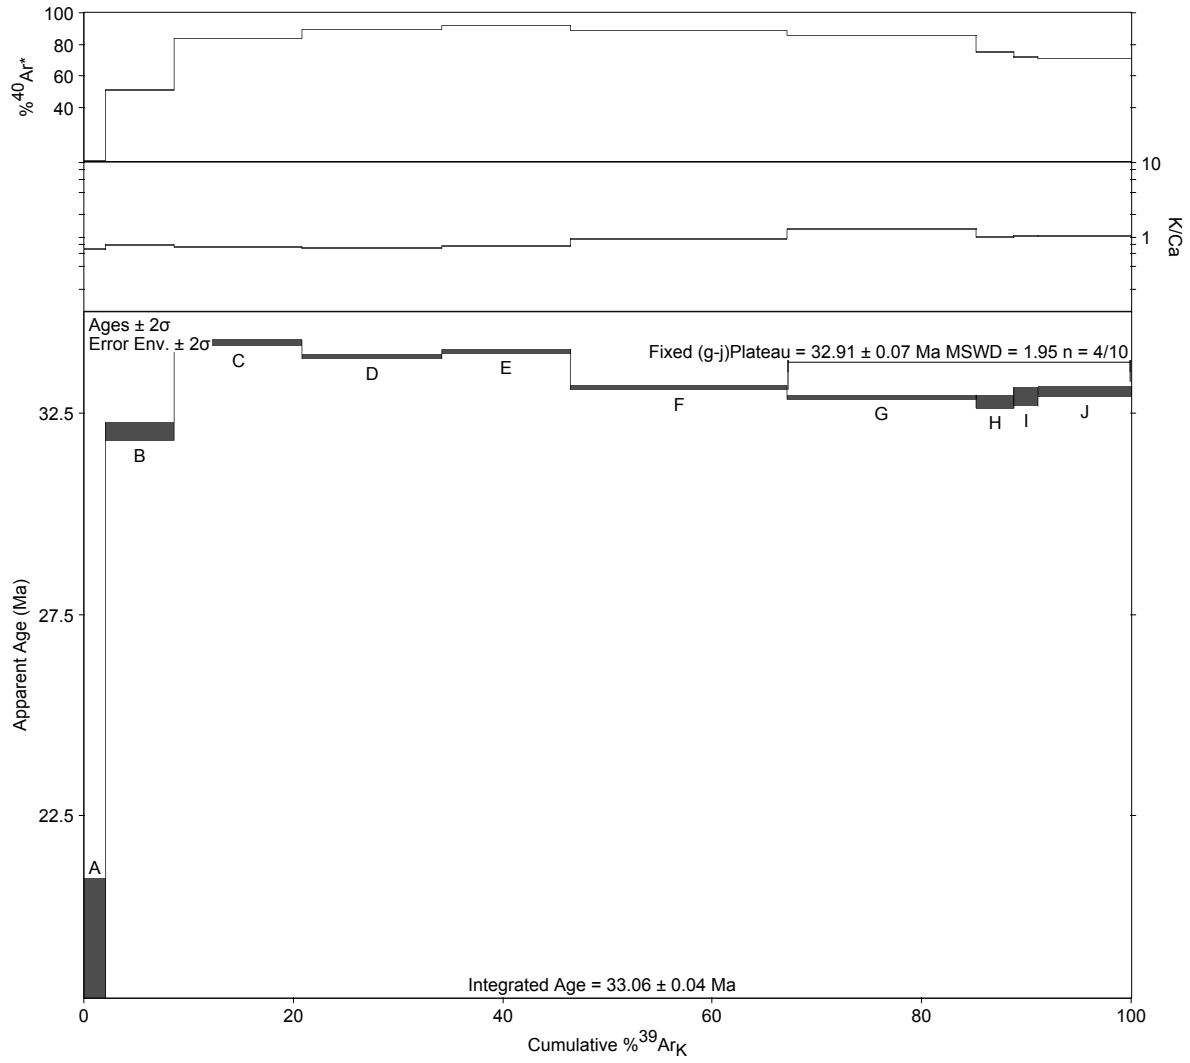

18L-23(67809-01,Biotite)

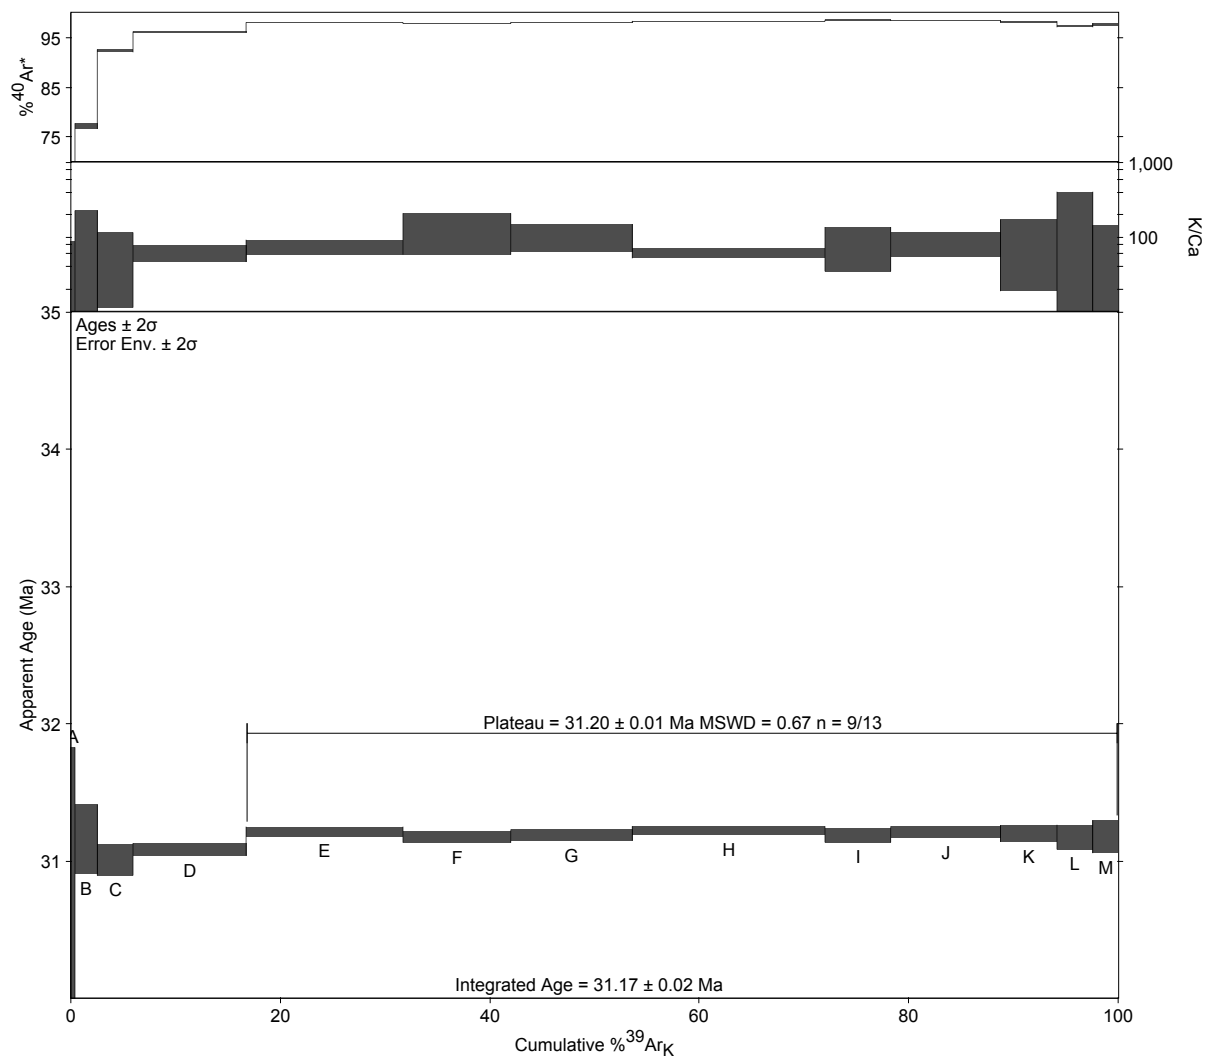

19L-13(67805)

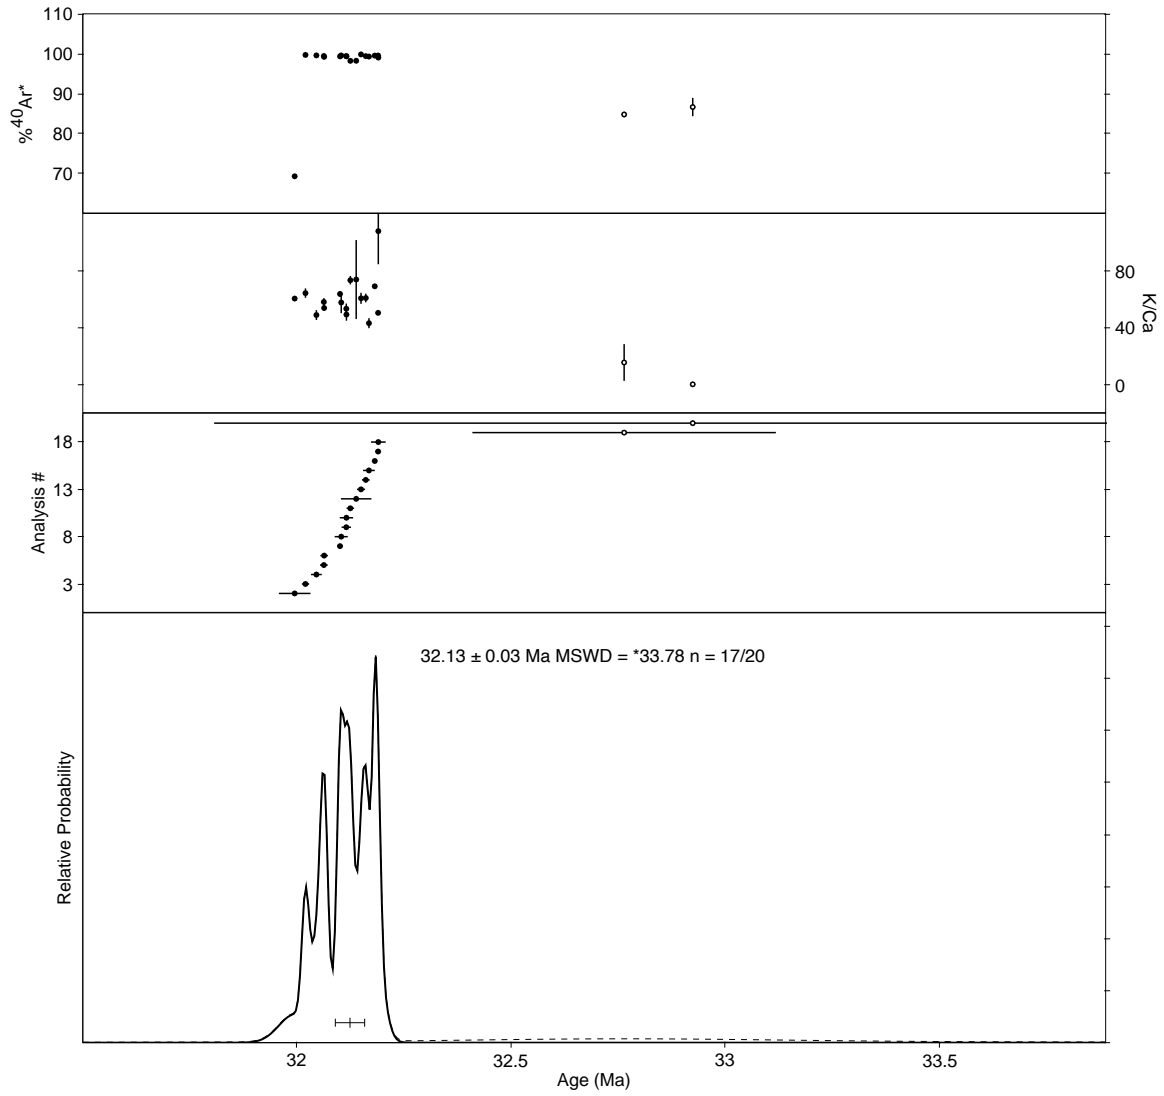

19L-13 6730101

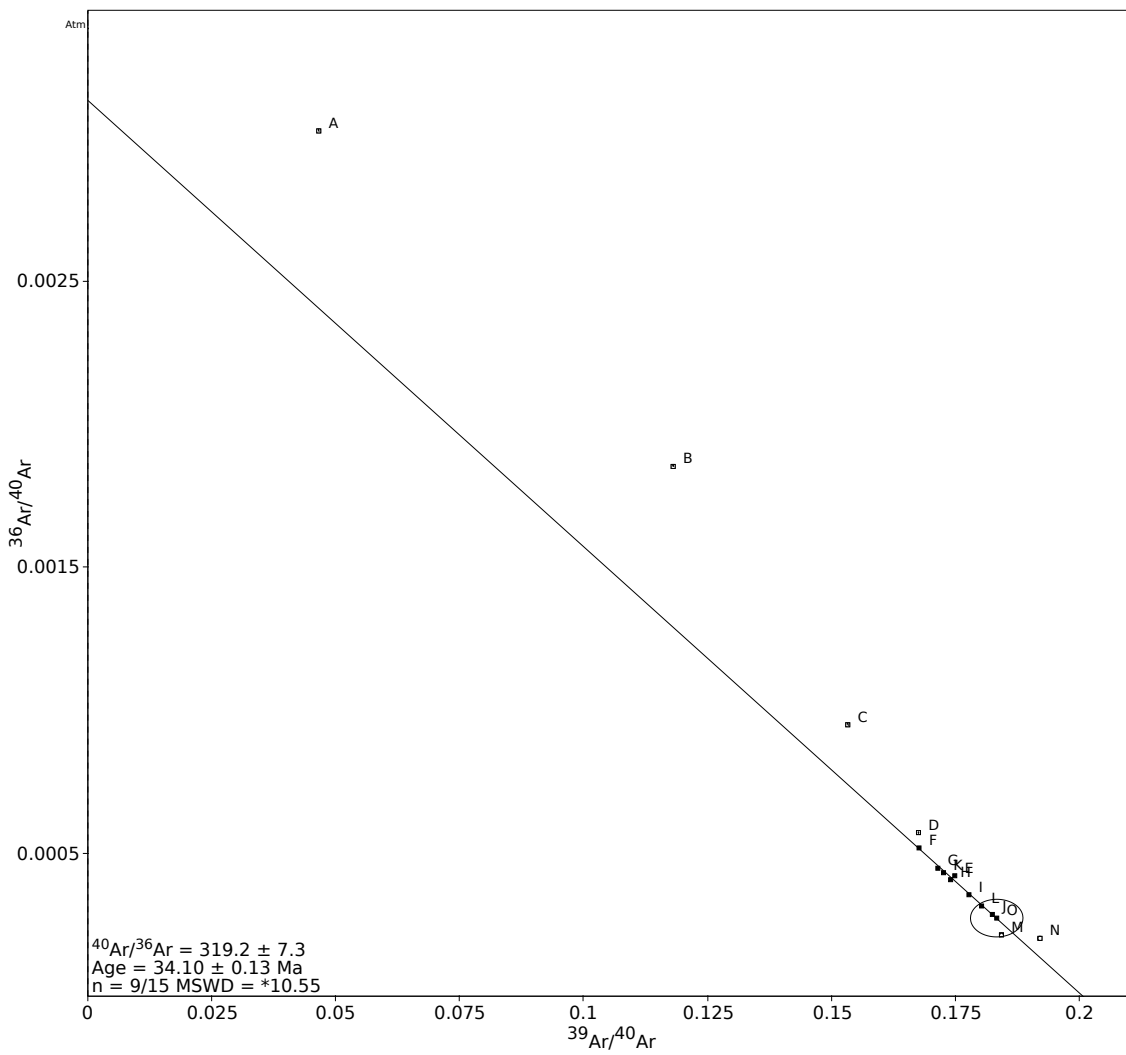

19L-13 6780601

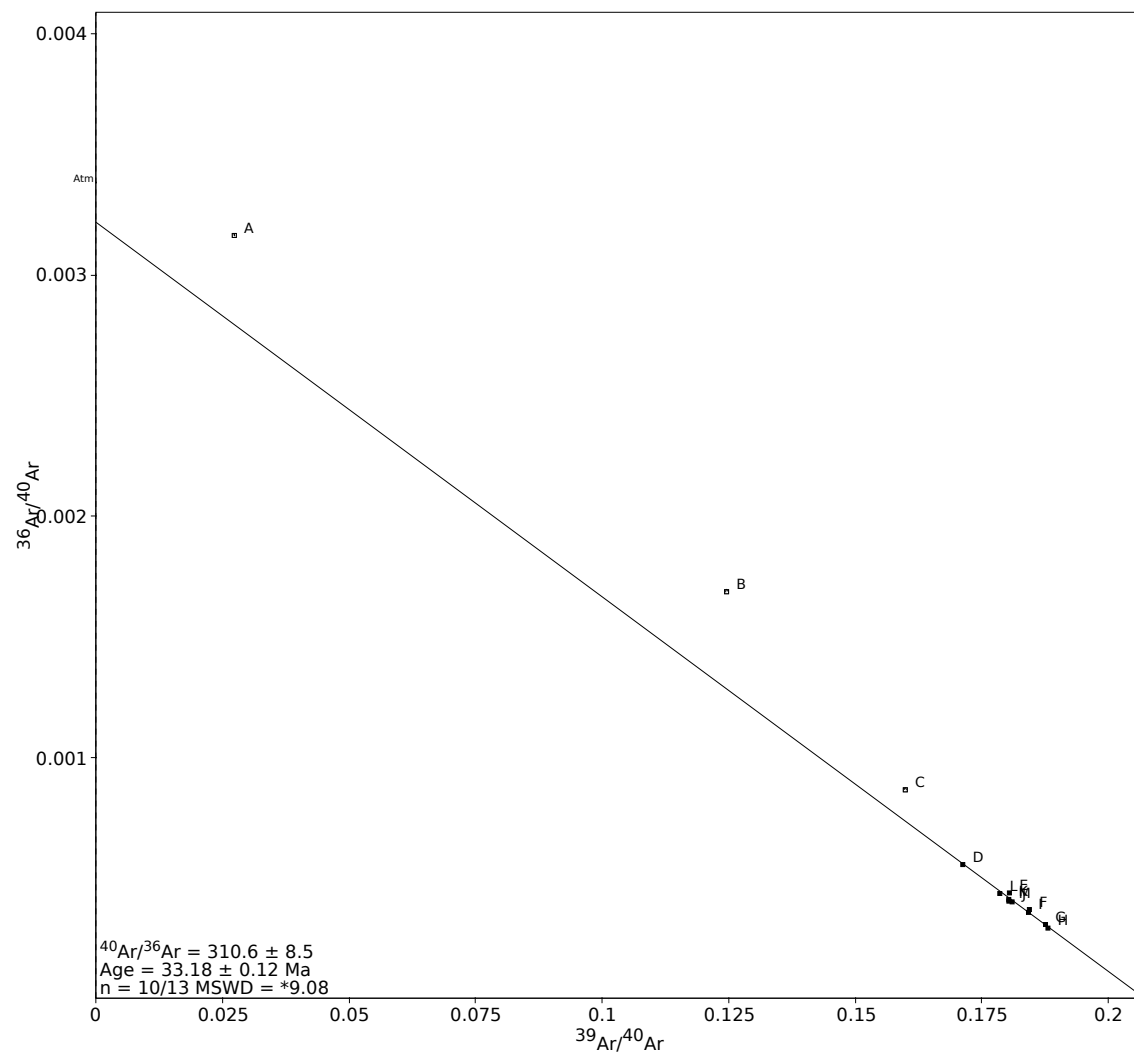

19L-13 6841601

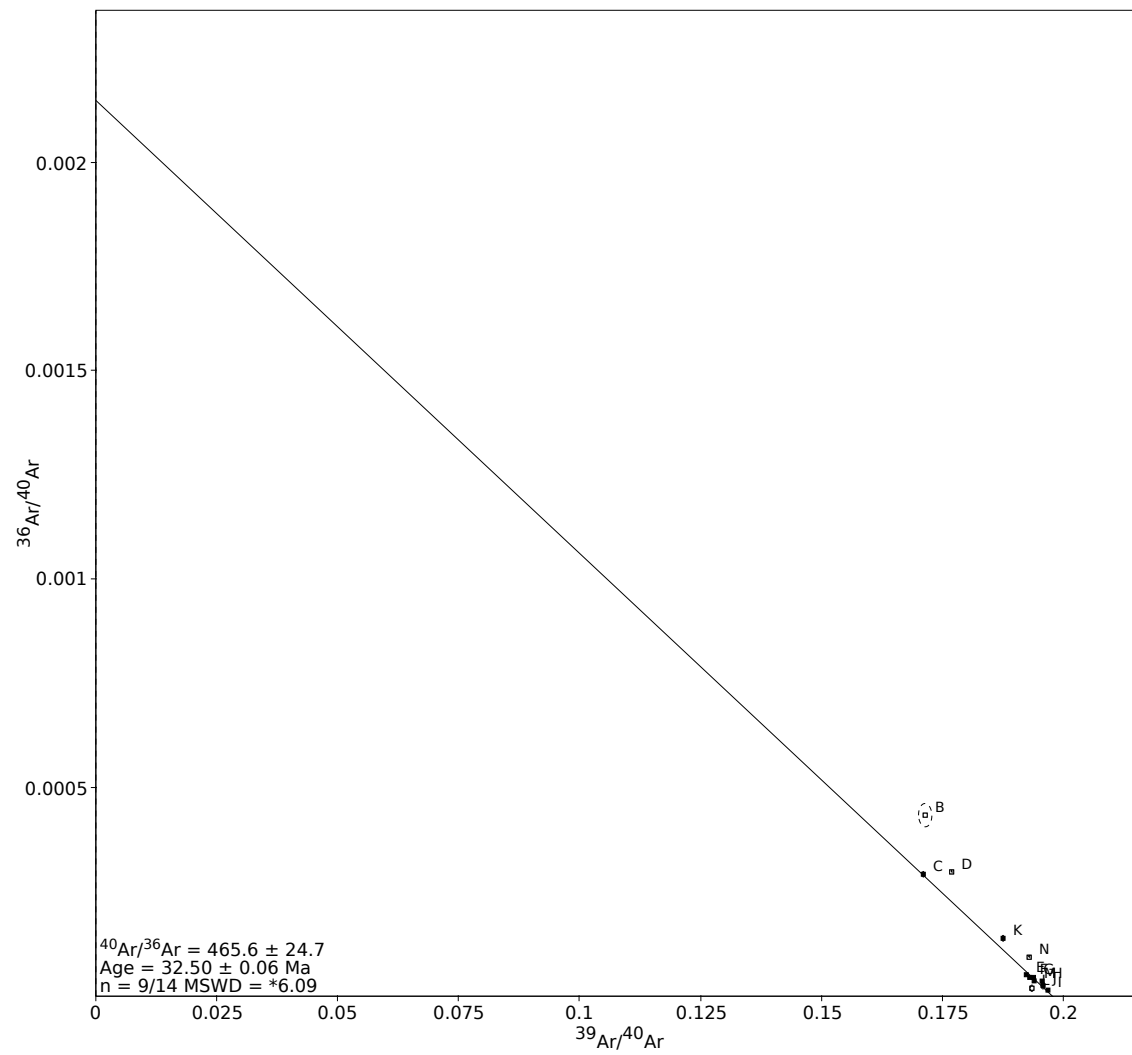



19L-6B(67493)

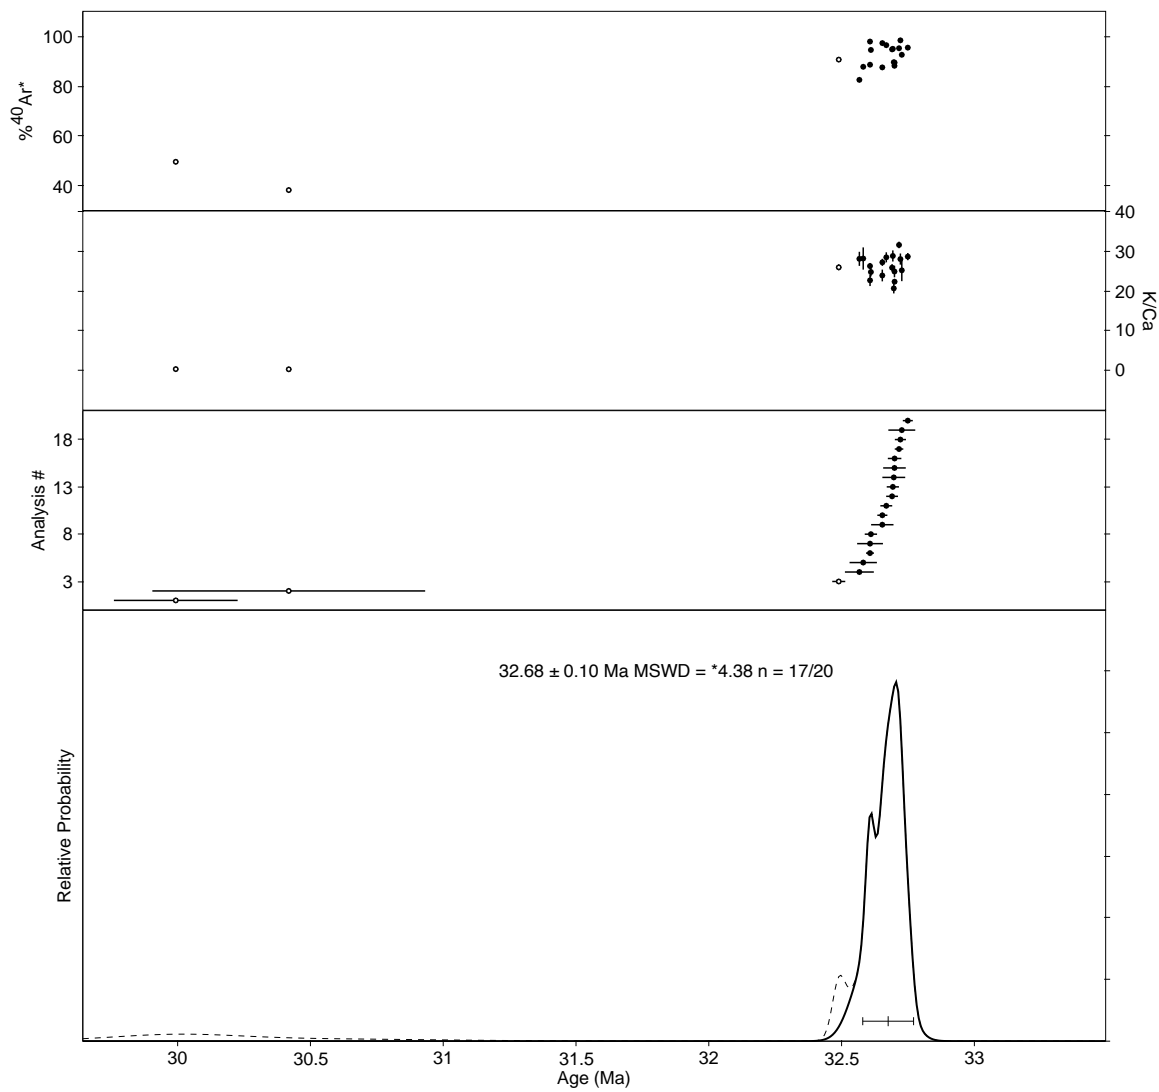

19L-6B 6749401

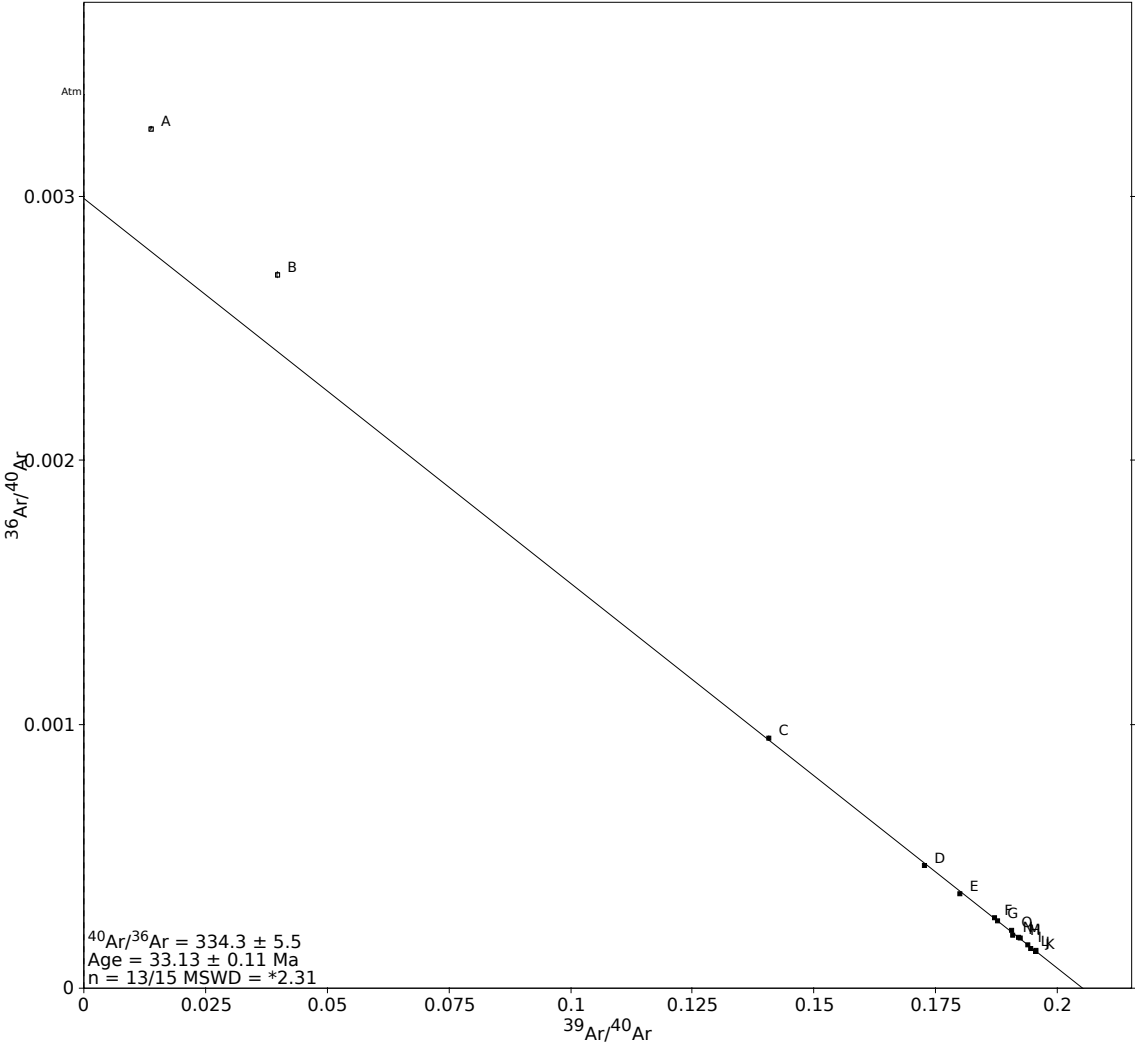

19L-6A 6729901

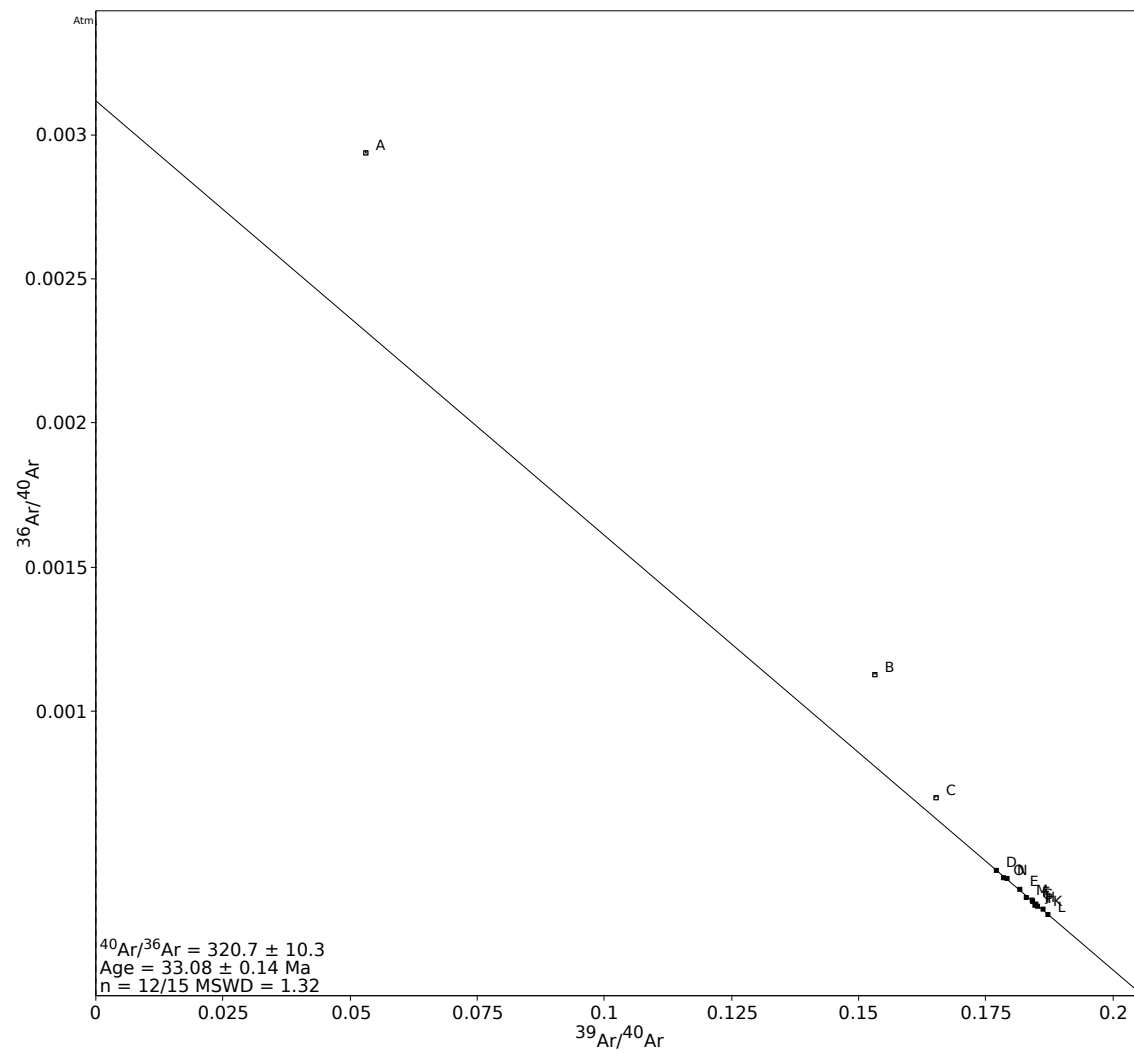

19L-8 6780401

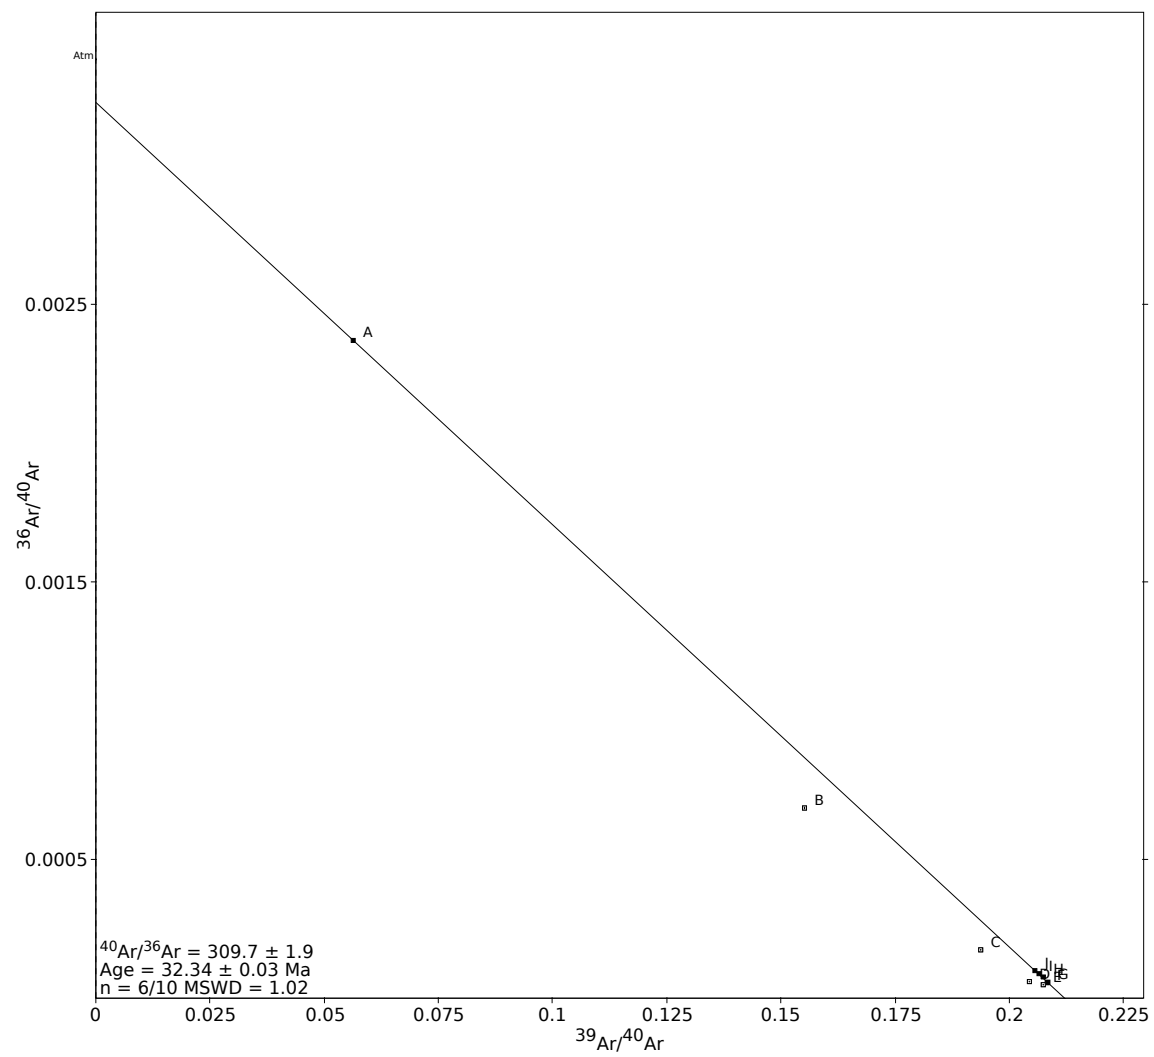

19L-11 6785401

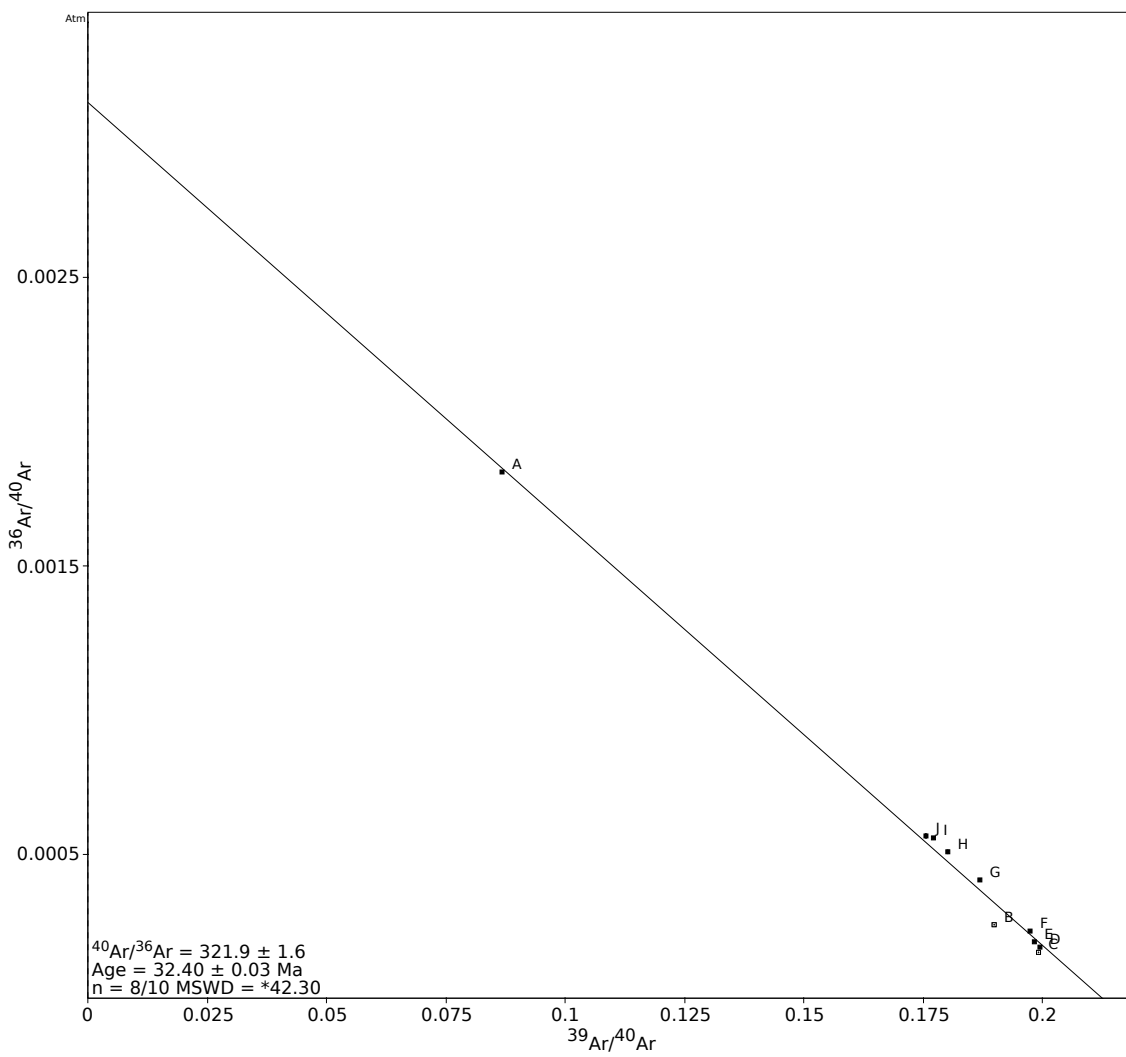

19L-9 6785601

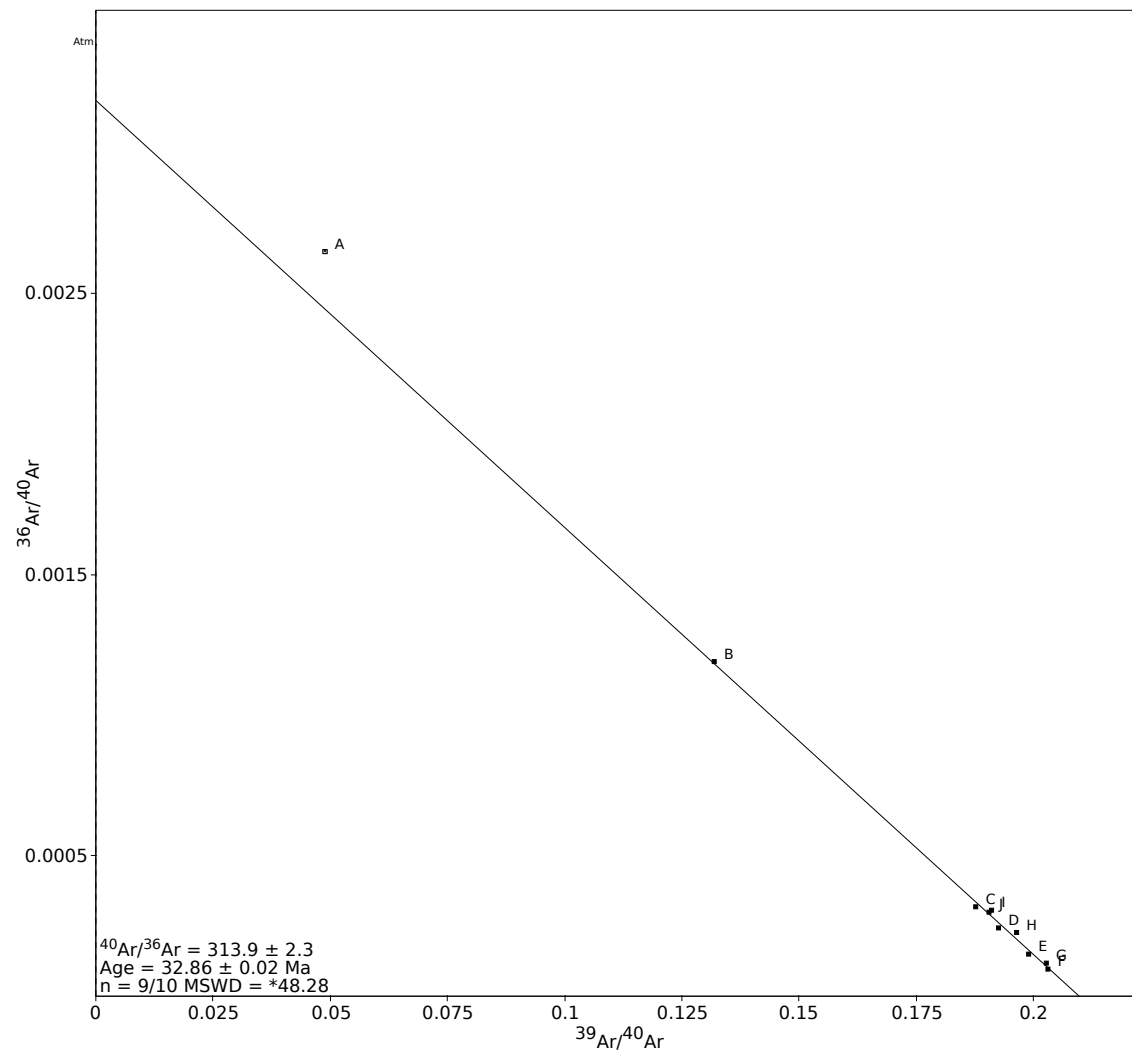

19L-10 6780701

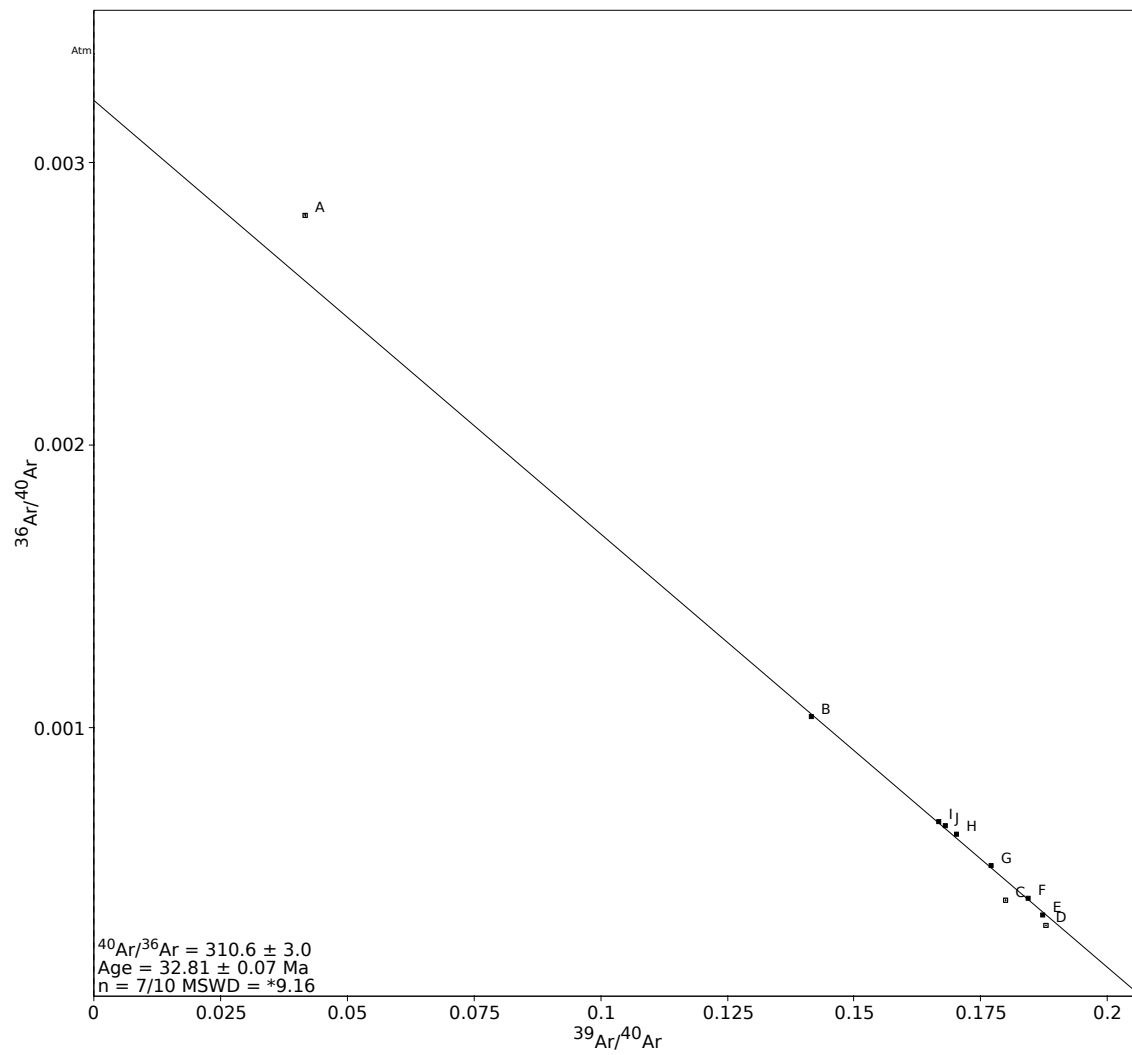

NFPCC-01 6953301

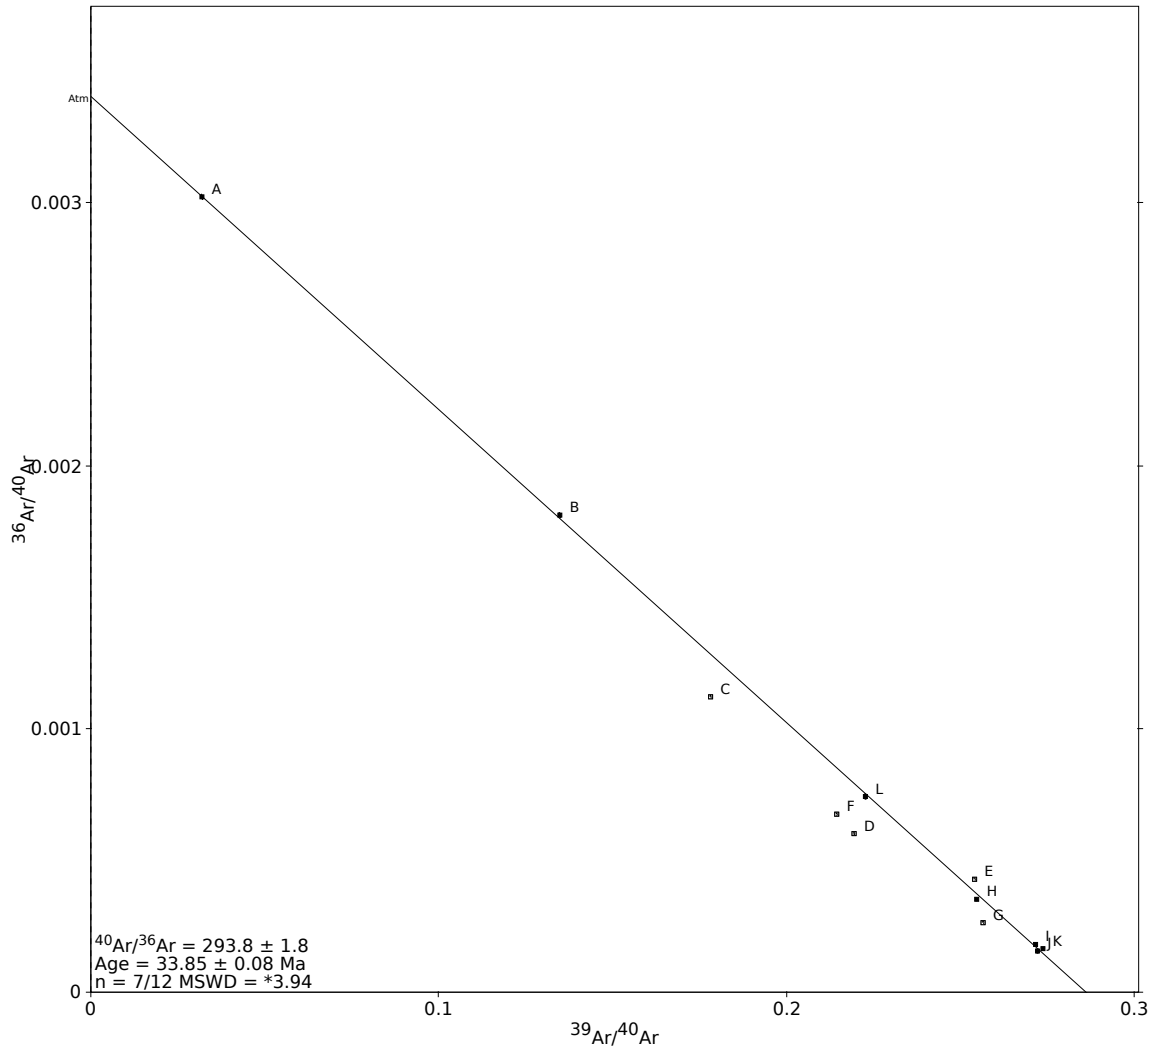



SMCN-01 6953001

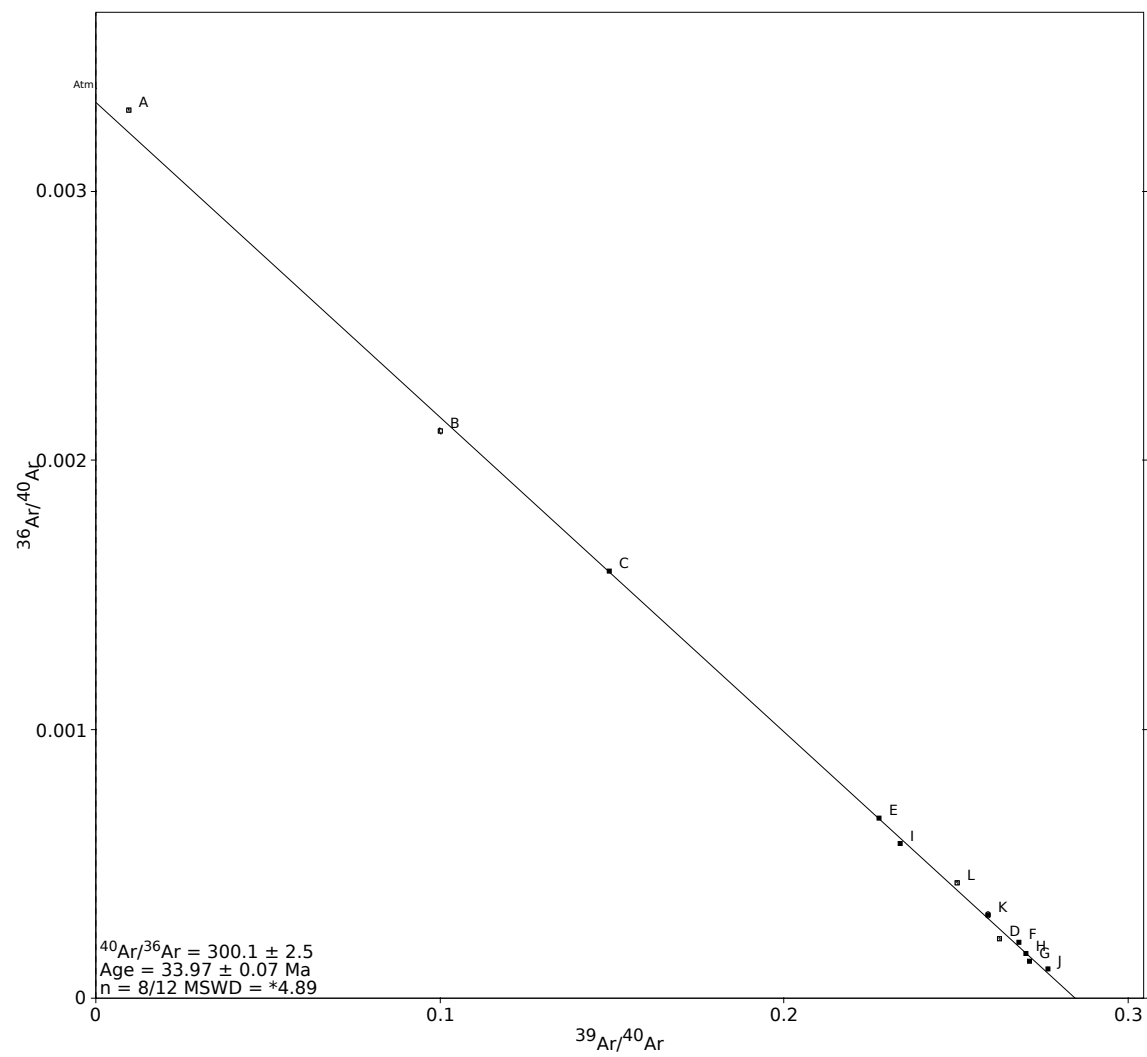

SMCN-03 6953101

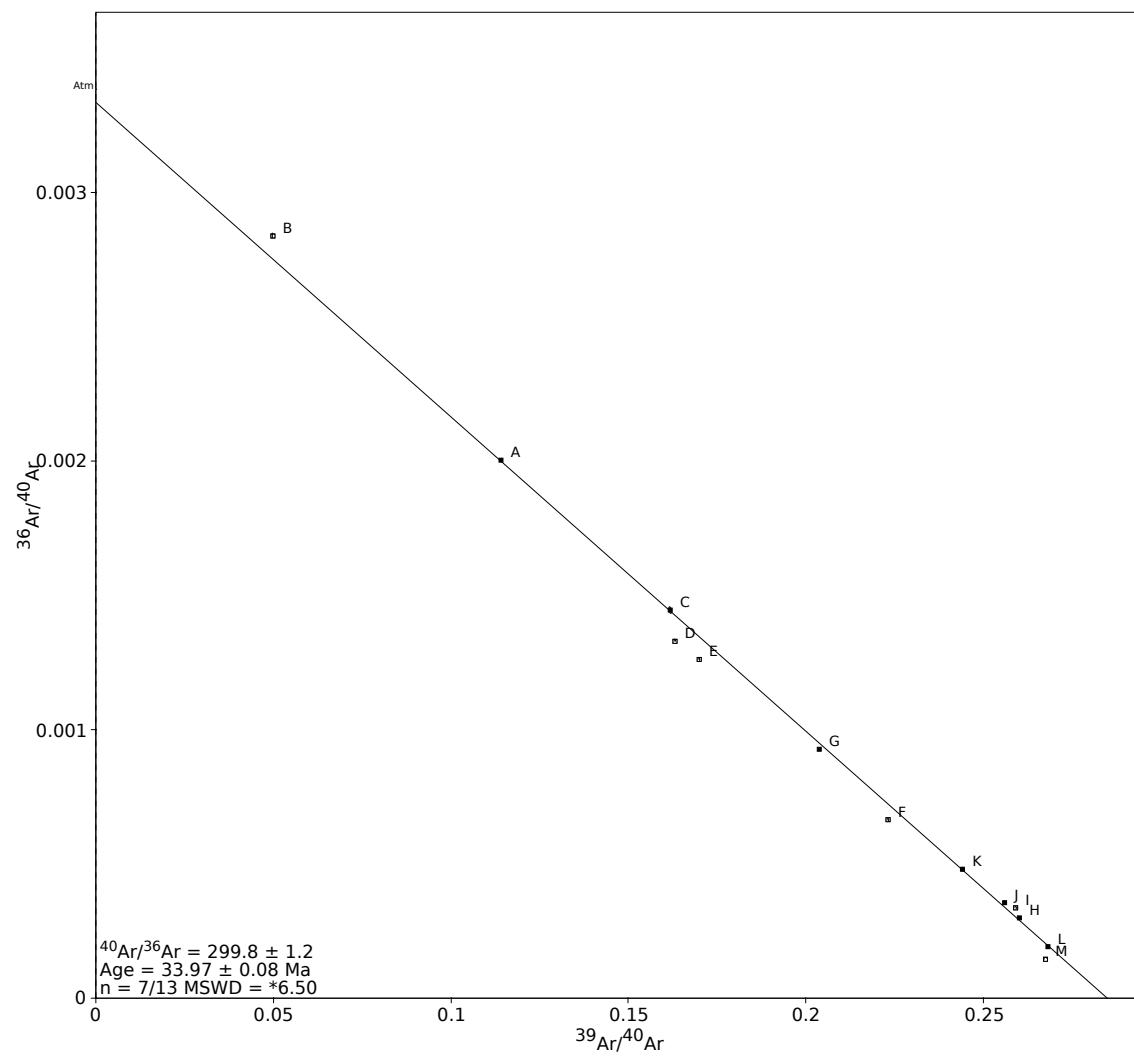

SMCN-04 6953201

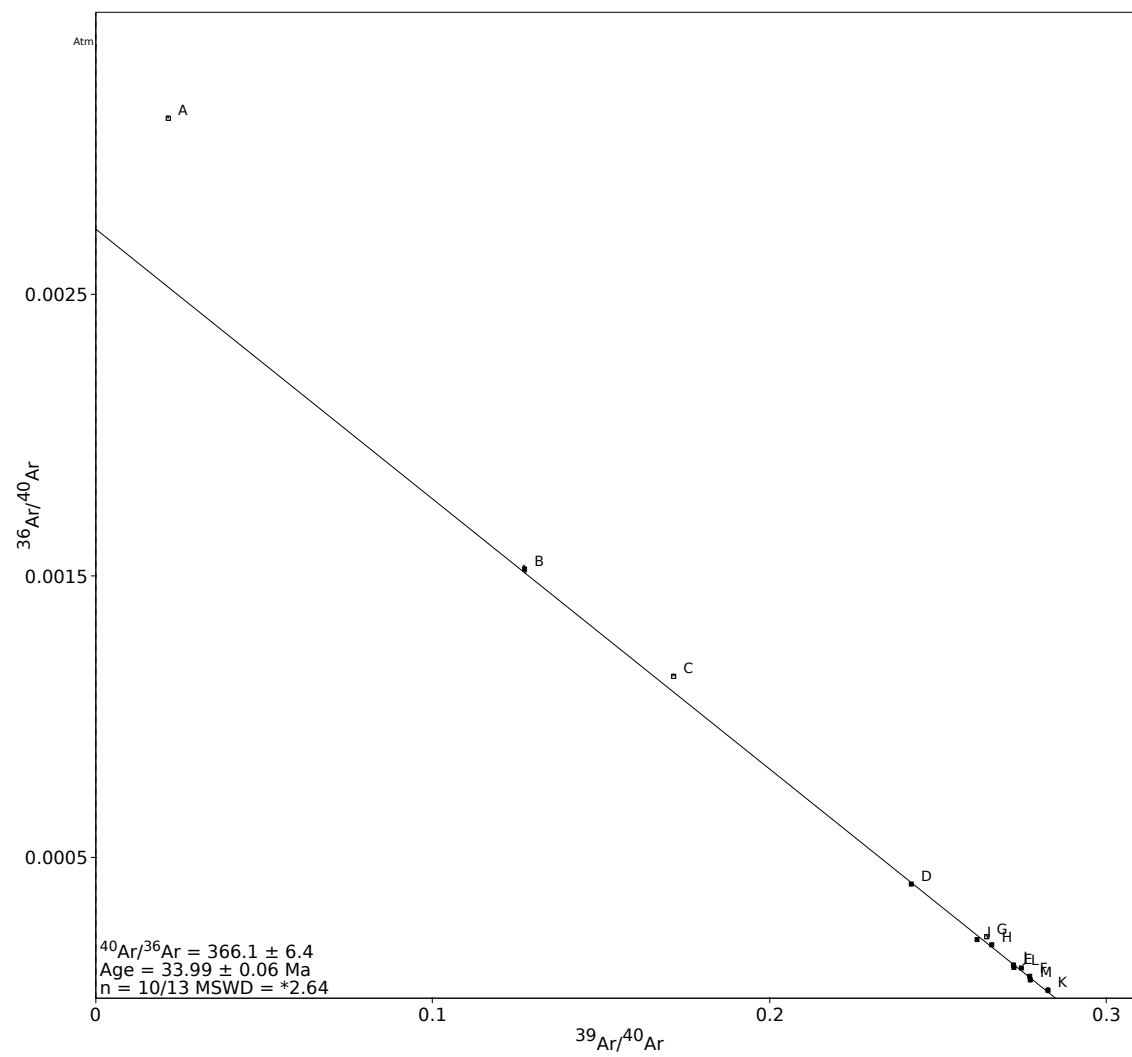

Supplement: Supplementary file 1 [file 1]
