# Supplementary material
Source: publisher figshare collection journal article supplement (https://gsapubs.figshare.com/articles/dataset/_/24442948)

**Supplemental Table S4-B.** Summary of  $^{206}\text{Pb}/^{238}\text{U}$  zircon crystallization dates. Each data point represents an analysis of a single spot; error bars in rank-order plots are  $1\sigma$  errors for single U-Pb analyses. The black horizontal line and colored box represent the calculated weighted mean date and  $2\sigma$  uncertainty, respectively. MSWD—mean square weighted deviates; n = #/#—number of grains of total number analyzed used in calculation.

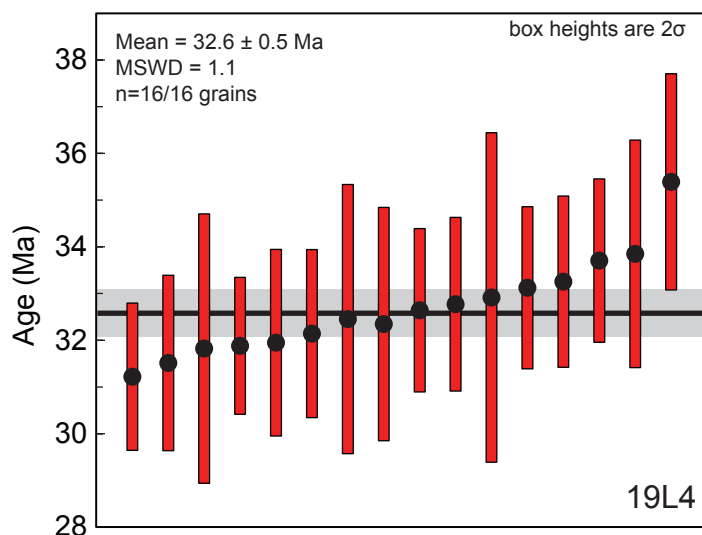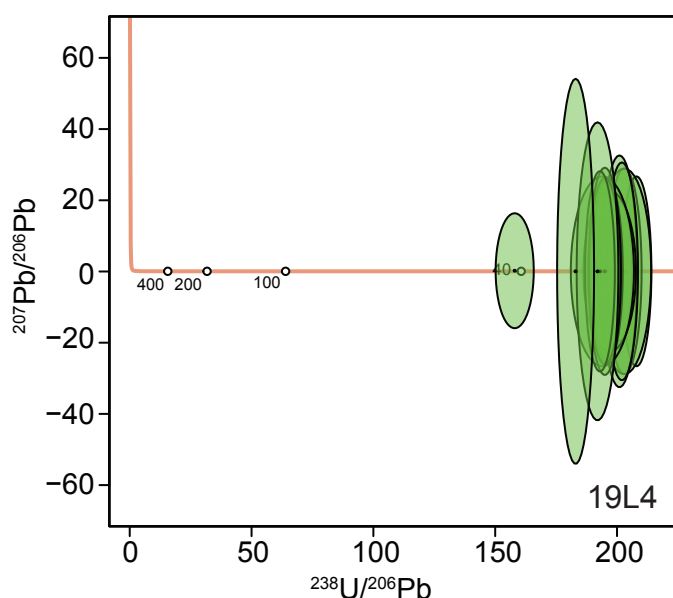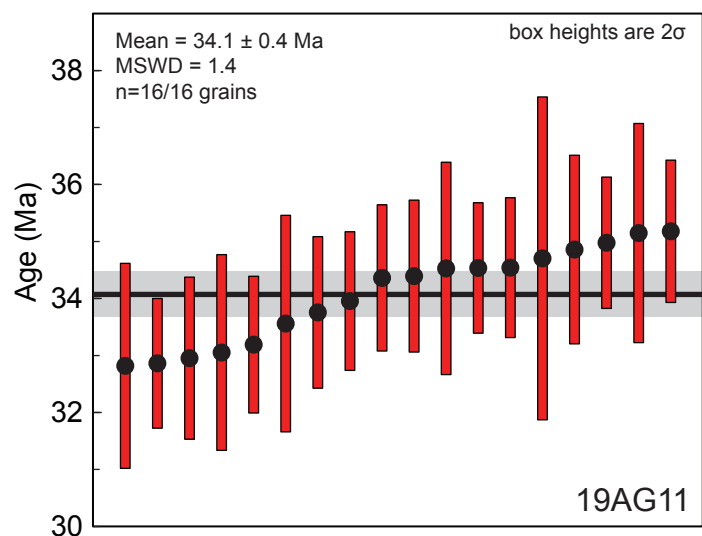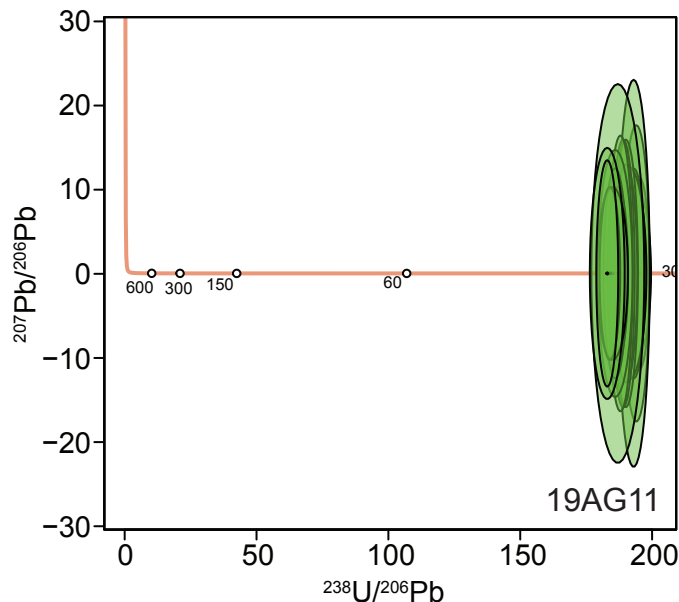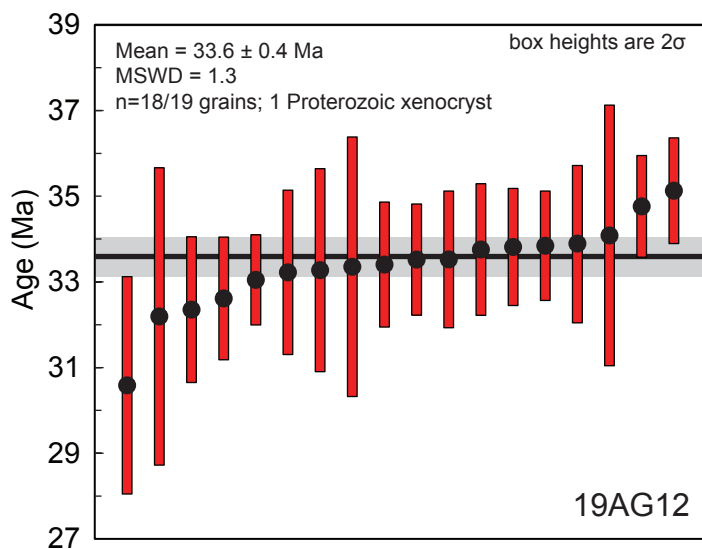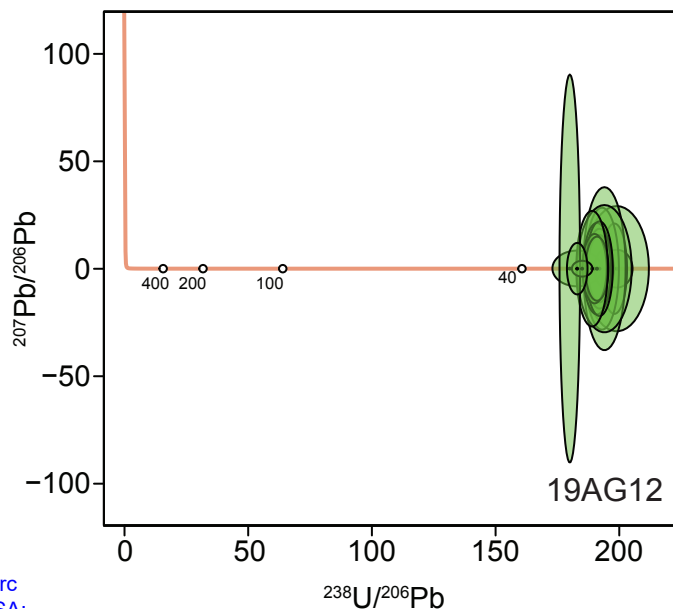

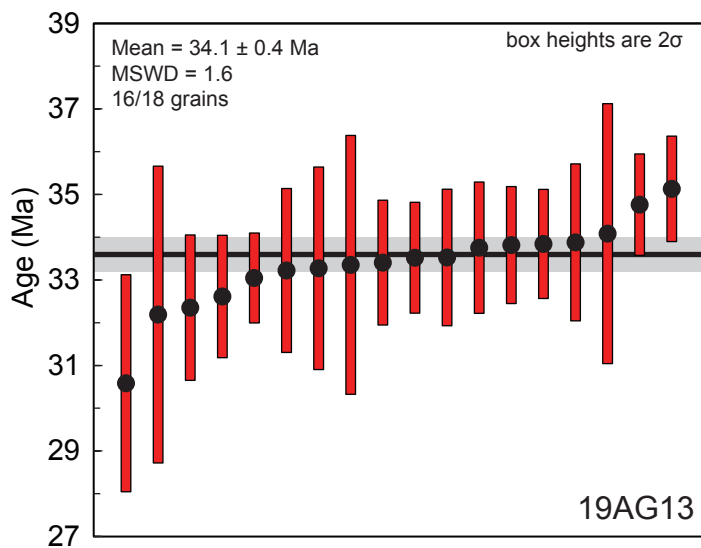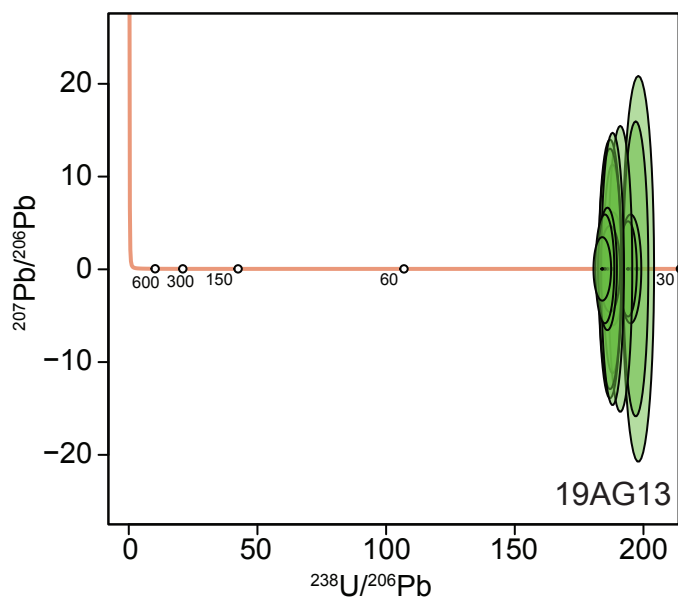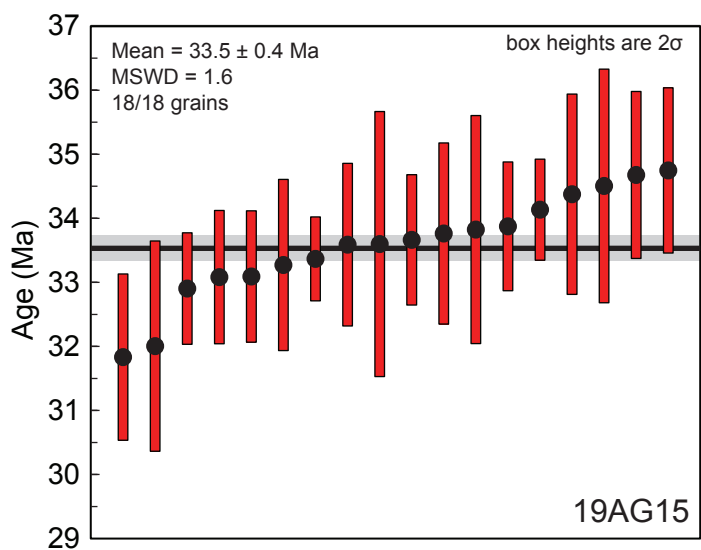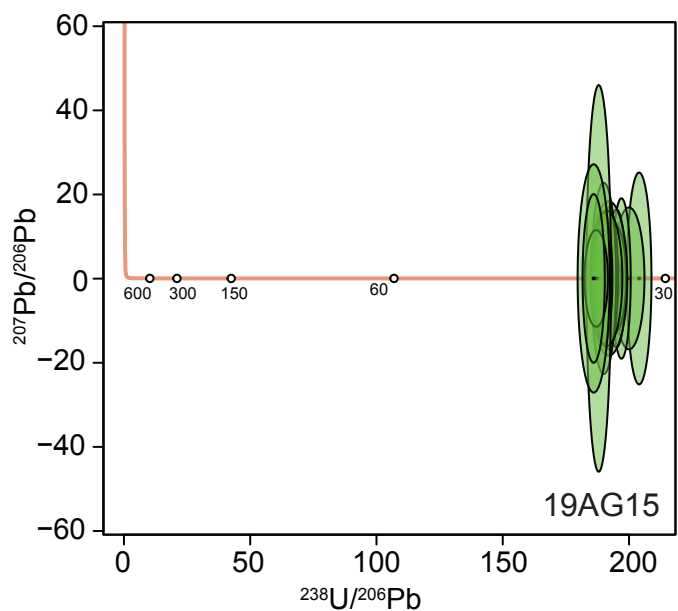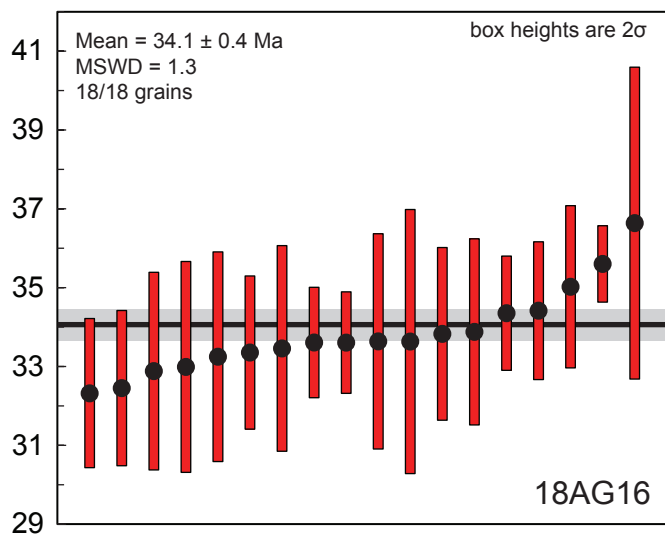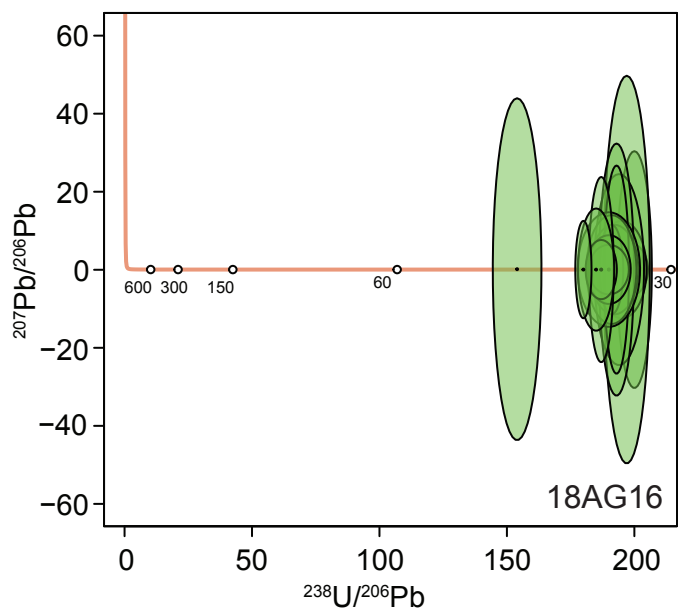

Table S4-B2

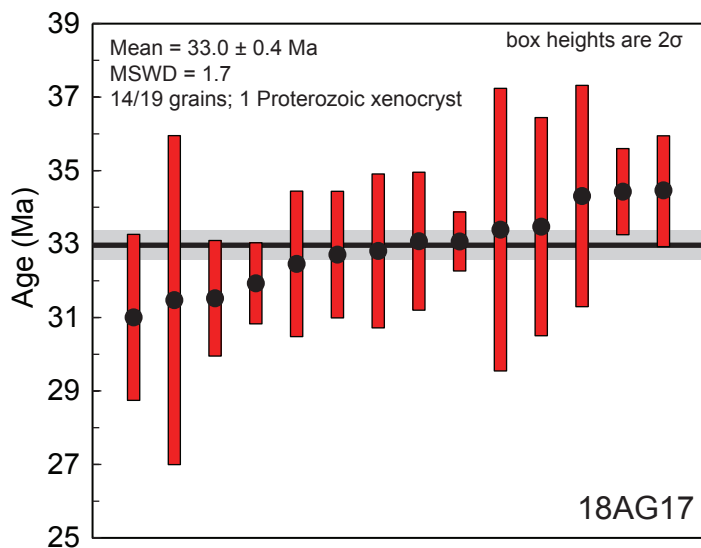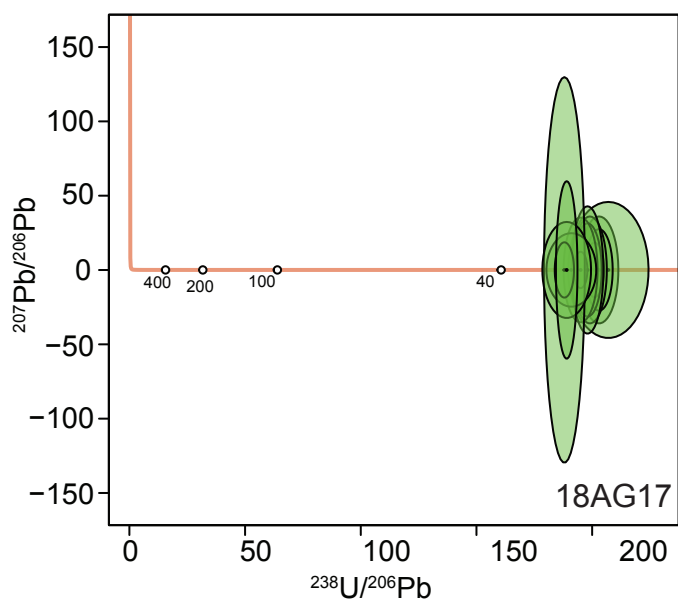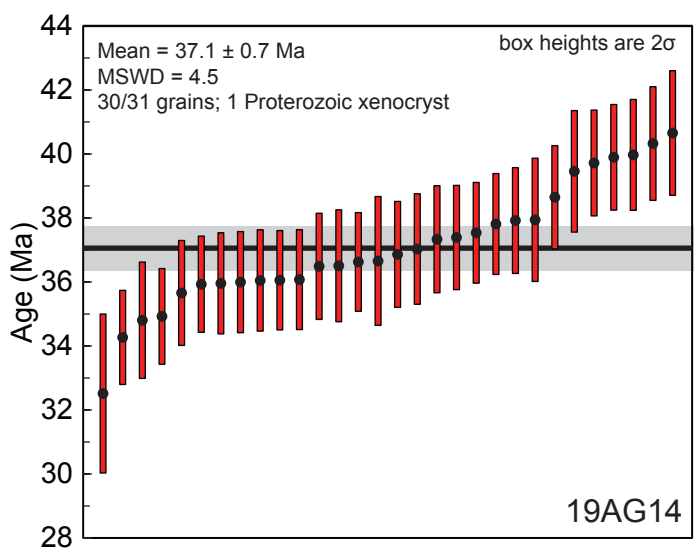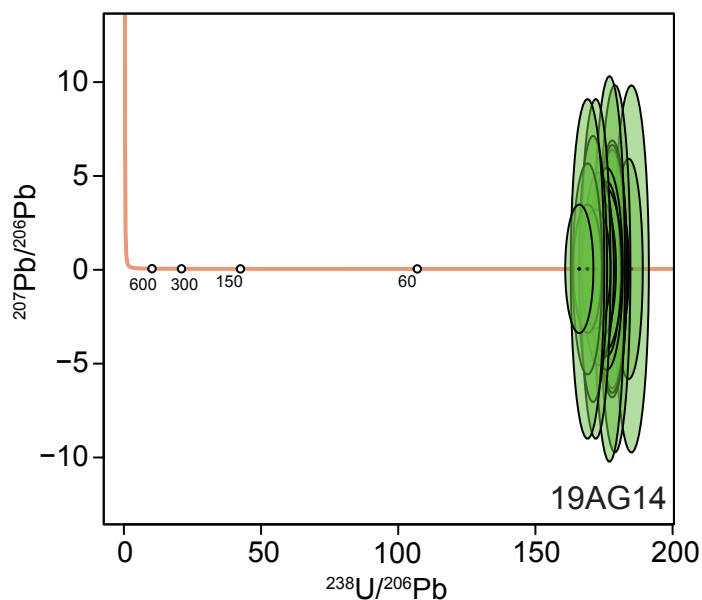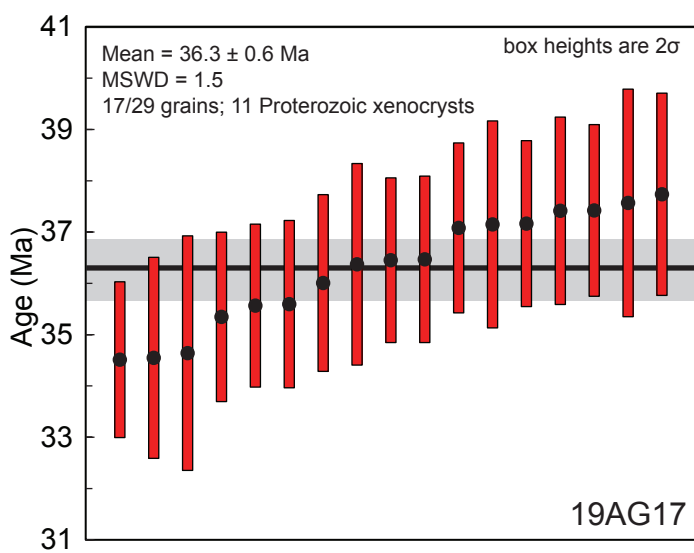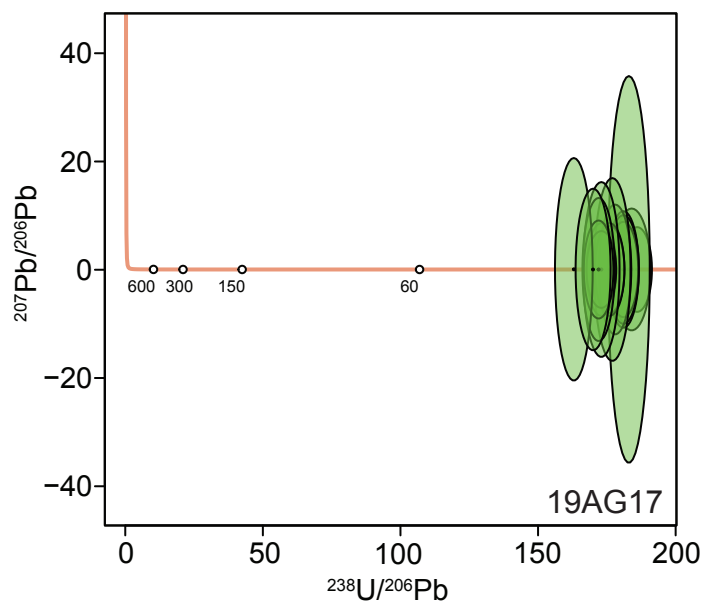

Supplement: Supplementary file 3 [file 1]
