# Supplementary material
Source: publisher figshare collection journal article supplement (https://gsapubs.figshare.com/articles/dataset/_/24442948)
Supplement: Supplementary file 1 [file 1]

## Sheet: Biedell-Lime
Biedell-Lime Creek volcanic complexAr/Ar analytical data.
	Sample:	18L-13			Identifier:	67274
	Material:	Groundmass
	Weight:	7.09 mg
																				Corrected1										Intercepts2										Blanks
	N	Tag	Power	Age	±1σ	K/Ca	±1σ	K/Cl	±1σ	Cum. %39Ar	%40Ar*	40Ar*/39ArK	±1σ	K2O	Sensitivity	39Ar/40Ar	±1σ	36Ar/40Ar	±1σ	40Ar	±1σ	39Ar	±1σ	38Ar	±1σ	37Ar	±1σ	36Ar	±1σ	40Ar	±1σ	39Ar	±1σ	38Ar	±1σ	37Ar	±1σ	36Ar	±1σ	40Ar	±1σ	39Ar	±1σ	38Ar	±1σ	37Ar	±1σ	36Ar	±1σ
			W	(Ma)	(Ma)					(%)	(%)			(wt. %)	mol/fA					(fA)		(fA)		(fA)		(fA)		(fA)		(fA)		(fA)		(fA)		(fA)		(fA)		(fA)		(fA)		(fA)		(fA)		(fA)
pX	01A	ok	0.8	27.8174	1.49558	1.27515	0.0132736	14.5006	0.530308	11.358	3.35437	4.09146	0.221649	0.381109	4e-16	0.00819848	4.41411e-06	0.00327058	2.68054e-06	8009	0.477414	65.6666	0.0351283	6.01378	0.00998126	15.2207	0.0302159	26.2013	0.0214113	8011.21	0.475995	65.7392	0.0210311	6.10562	0.00536319	15.3135	0.0146622	25.6652	0.0122993	1.90079	0.0294364	-0.0269528	0.0163326	-0.00541755	0.00702416	0.00636184	0.0209014	0.00782399	0.000236574
	01B	ok	1	33.1032	0.278964	0.95381	0.00985232	36.1419	3.13961	22.0695	20.7533	4.87595	0.0414628	0.359414	4e-16	0.0425628	2.29998e-05	0.00268178	3.8571e-06	1454.89	0.175467	61.9341	0.0326106	1.59959	0.00974846	19.185	0.0290487	3.9108	0.00559154	1456.67	0.172505	62.0122	0.0186902	1.68429	0.00482169	19.2536	0.0160183	3.83761	0.00484859	1.92552	0.0275574	-0.0226927	0.0152677	-0.00515004	0.00657558	0.00575427	0.0195518	0.00800476	0.000221677
	01C	ok	1.3	33.3126	0.178392	0.864663	0.0088904	60.8603	7.59766	33.4337	31.4143	4.90708	0.0265176	0.381316	4e-16	0.0640188	3.29733e-05	0.002321	4.14848e-06	1026.23	0.123168	65.7108	0.0328978	1.31867	0.00882775	22.4358	0.025984	2.39254	0.00424717	1028.05	0.120418	65.8014	0.0205887	1.40385	0.00494073	22.5023	0.0153665	2.35163	0.00385484	2.02899	0.0224315	-0.00487485	0.0121009	-0.00403119	0.00534924	0.00321308	0.0156905	0.00876086	0.000183369
	01D	ok	1.6	33.4446	0.144974	0.78139	0.00806572	76.8941	15.8823	42.1715	39.2185	4.9267	0.0215517	0.293187	4e-16	0.0796049	4.43123e-05	0.00205689	4.58187e-06	634.558	0.0637728	50.5259	0.0276487	0.904155	0.00896058	19.0852	0.0278071	1.3143	0.00290398	636.387	0.0576242	50.5837	0.0169533	0.991048	0.00503016	19.1777	0.0152425	1.29594	0.00270705	2.05235	0.0220936	-0.000851448	0.0117872	-0.00377855	0.00526738	0.00263926	0.0153647	0.00893159	0.000181747
	01E	ok	1.9	33.7052	0.164489	0.715712	0.00740921	58.5684	11.5933	48.8787	40.3769	4.96545	0.0244563	0.225055	4e-16	0.0813166	5.46674e-05	0.00201769	5.71836e-06	476.845	0.0619604	38.7862	0.0255695	0.697472	0.0086754	15.9912	0.0258147	0.969737	0.0027235	478.702	0.0558659	38.8176	0.017455	0.782387	0.00468639	16.0495	0.0146392	0.958739	0.00258535	2.07921	0.0221432	0.00377489	0.0116542	-0.00348804	0.00527769	0.00197945	0.0152913	0.00912791	0.000183513
	01F	ok	2.2	33.9466	0.197282	0.675421	0.00702714	43.7596	9.13179	54.1763	36.5312	5.00134	0.0293358	0.177755	4e-16	0.0730436	5.7211e-05	0.00214783	6.18995e-06	419.283	0.0634866	30.6354	0.0235293	0.589276	0.00969468	13.3814	0.0251265	0.906922	0.00259145	421.133	0.0580057	30.66	0.0167743	0.666108	0.00511023	13.4489	0.013635	0.897395	0.00246146	2.10284	0.0225718	0.00784337	0.0117449	-0.00323257	0.00537857	0.0013992	0.0154965	0.00930056	0.000188193
	01G	ok	3	33.7582	0.170862	0.487638	0.00500142	44.4141	5.72752	62.7061	34.0349	4.97332	0.0254046	0.286209	4e-16	0.0684356	3.74351e-05	0.00223231	4.46087e-06	720.555	0.0725793	49.3365	0.0265057	0.979734	0.00945492	29.8361	0.0263543	1.62272	0.00320919	722.459	0.067206	49.3832	0.017062	1.05693	0.00513733	29.9115	0.0159023	1.5985	0.00295493	2.12646	0.0233405	0.0119118	0.0120256	-0.00297709	0.00556064	0.000818957	0.0159444	0.0094732	0.000195583
	01H	ok	5	33.8653	0.150283	0.284616	0.00290899	62.872	7.72801	75.2073	36.0177	4.98924	0.022346	0.41947	4e-16	0.0721914	3.30651e-05	0.00216521	4.00395e-06	1001.11	0.0839144	72.3446	0.0325328	1.37707	0.00925258	74.9031	0.0277627	2.20331	0.00399944	1003.05	0.0775706	72.4042	0.0196026	1.45913	0.0052255	74.9941	0.0184036	2.16722	0.00364106	2.15012	0.024419	0.015986	0.0124842	-0.00272126	0.00581666	0.000237906	0.0166165	0.00964609	0.000205408
pX	01I	ok	7	34.52	0.171852	0.278217	0.00285155	57.4813	12.5003	81.6779	37.8917	5.08662	0.0255623	0.217113	4e-16	0.0744937	4.92605e-05	0.00210179	5.29884e-06	502.149	0.0619445	37.4458	0.0242955	0.704244	0.00938134	39.654	0.0281371	1.07432	0.00265553	504.088	0.053547	37.4859	0.0161957	0.78796	0.00505807	39.7408	0.0159776	1.06183	0.002496	2.1743	0.0258001	0.0201502	0.0131171	-0.00245977	0.00614498	-0.000356003	0.0175077	0.0098228	0.000217613
pX	01J	ok	10	34.8916	0.157181	0.288176	0.00294984	57.0669	10.1236	90.3691	38.2928	5.1419	0.0233848	0.291626	4e-16	0.0744728	4.29622e-05	0.00208822	4.65106e-06	674.675	0.0694491	50.295	0.0285125	0.944211	0.0103326	51.4138	0.0297142	1.43338	0.00313166	676.629	0.0627107	50.3259	0.0194546	1.02164	0.00574196	51.4743	0.0169189	1.41363	0.00291338	2.19848	0.0274209	0.0243145	0.0138935	-0.00219828	0.00653057	-0.000949912	0.018576	0.0099995	0.000231664
pX	01K	ok	15	35.01	0.167055	0.275829	0.00282222	62.3515	10.5216	100	37.4056	5.15951	0.0248554	0.323157	4e-16	0.0724989	3.88314e-05	0.00211824	4.88151e-06	767.977	0.0753946	55.736	0.0293081	1.05379	0.00994289	59.5128	0.0319113	1.65514	0.00374218	769.972	0.0677267	55.7599	0.0187248	1.13184	0.00528374	59.5678	0.0184614	1.63096	0.00349528	2.22247	0.0292259	0.028445	0.014783	-0.00193891	0.00696023	-0.001539	0.0197823	0.0101748	0.000247112
Integrated K/Ca ±2σ						0.559171	0.0114213	SD
Plateau Age ±2σ				33.6307	0.201312	n=7/11	MSWD = 2.36	steps B-H
Total Integrated Age ±2σ				33.2245	0.355058									K2O wt. %=3.36
Isochron Age ±2σ				34.5353	0.138641		MSWD = *19.88
(40Ar/36Ar)trapped ±2σ				292.845	0.493652
	Sample:	18L-14			Identifier:	67860
	Material:	Biotite
	Weight:	2.76 mg
pX	01A	ok	0.5	7.83222	1.4385	2.86967	0.240178	16.2522	5.46261	0.48881	2.0945	1.12617	0.20728	0.0303636	2.13e-16	0.0185984	7.16923e-05	0.00331321	1.17756e-05	209.194	0.0533023	3.88952	0.0149582	0.193109	0.00533721	0.205795	0.0170601	0.693295	0.00245694	209.093	0.0451476	3.87937	0.0146711	0.29568	0.00522402	0.32848	0.0156015	0.695848	0.00241134	0.354357	0.0283342	0.0289884	0.00239744	0.00413504	0.00109333	0.0053733	0.00690201	0.00225086	0.000169553
pX	01B	ok	0.8	13.1368	0.707399	4.97434	0.589569	34.8155	20.8097	1.10349	9.14714	1.89165	0.102228	0.0381823	2.13e-16	0.0483556	0.000155302	0.00307454	1.58544e-05	101.179	0.048247	4.89079	0.0155321	0.126915	0.0055861	0.149364	0.0176028	0.311216	0.00159713	101.058	0.0401105	4.88986	0.0152312	0.242103	0.00547806	0.239346	0.0161932	0.313588	0.0015771	0.350425	0.0268127	0.0289884	0.00239744	0.00413504	0.00109333	0.0053733	0.00690201	0.00224359	0.000160493
pX	01C	ok	1	22.0944	0.449067	12.8594	3.72511	-262.039	1164.25	1.7387	26.5676	3.18931	0.0652144	0.0394578	2.13e-16	0.0833031	0.000231078	0.00248501	1.76606e-05	60.6943	0.0424004	5.05393	0.0135668	0.0881195	0.00570837	0.0598408	0.0172552	0.150879	0.00106655	60.5644	0.0339558	5.04803	0.0132353	0.20316	0.00560269	0.175206	0.0158147	0.153178	0.00105165	0.346483	0.0253928	0.0289884	0.00239744	0.00413504	0.00109333	0.0053733	0.00690201	0.00223631	0.000152078
pX	01D	ok	1.5	29.8648	0.149901	13.1057	0.961654	137.803	76.0097	4.33109	55.463	4.32014	0.0218616	0.161032	2.13e-16	0.128384	0.000117778	0.00150714	8.95771e-06	160.724	0.0479247	20.6257	0.0178922	0.304817	0.00547887	0.239605	0.0173395	0.242451	0.00143776	160.592	0.0414246	20.6109	0.016684	0.432376	0.00536867	0.323366	0.0159066	0.244786	0.00142259	0.342546	0.0240994	0.0289884	0.00239744	0.00413504	0.00109333	0.0053733	0.00690201	0.00222904	0.000144462
pX	01E	ok	1.75	32.6472	0.0721137	15.6796	0.995798	50.1576	7.69353	7.94847	80.0873	4.72623	0.010533	0.224703	2.13e-16	0.169457	0.000132152	0.000673805	5.51586e-06	169.915	0.0479149	28.7808	0.0209215	0.407713	0.00582664	0.279631	0.0174433	0.114748	0.000936491	169.788	0.0420603	28.7652	0.019166	0.518259	0.00572314	0.354003	0.0160197	0.11702	0.00092376	0.338609	0.0229515	0.0289884	0.00239744	0.00413504	0.00109333	0.0053733	0.00690201	0.00222176	0.000137763
pX	01F	ok	2	33.0236	0.049431	15.0834	0.72116	73.383	12.5432	12.5764	87.4429	4.78122	0.00722145	0.287477	2.13e-16	0.182893	0.00010952	0.000424873	4.02302e-06	201.414	0.0464375	36.8212	0.0203411	0.494701	0.00565974	0.371765	0.0172835	0.0859186	0.000809857	201.286	0.040888	36.8026	0.0175702	0.614229	0.00555313	0.455207	0.0158455	0.0881718	0.0007974	0.334858	0.0220139	0.0289884	0.00239744	0.00413504	0.00109333	0.0053733	0.00690201	0.00221483	0.000132361
	01G	ok	2.5	33.2642	0.0326461	9.87041	0.188491	66.2617	5.31261	21.3638	90.0076	4.81637	0.00476996	0.545851	2.13e-16	0.186883	8.05951e-05	0.000338078	2.64523e-06	374.272	0.0578881	69.9157	0.0281245	0.939604	0.00542998	1.07683	0.0173211	0.127529	0.000989667	374.155	0.05386	69.8743	0.0210118	1.05625	0.00531877	1.18624	0.0158865	0.129792	0.000978365	0.330921	0.0212164	0.0289884	0.00239744	0.00413504	0.00109333	0.0053733	0.00690201	0.00220756	0.000127856
	01H	ok	2.75	33.2713	0.0307847	6.84708	0.106474	54.8317	3.73492	29.729	91.9009	4.81741	0.00449799	0.519624	2.13e-16	0.190773	8.36579e-05	0.000274004	2.51267e-06	349.023	0.0555535	66.5574	0.0271748	0.904008	0.00530881	1.47612	0.0172708	0.097001	0.000876659	348.898	0.0515806	66.5234	0.0205867	1.02648	0.00519501	1.57966	0.0158318	0.0992443	0.000865878	0.326979	0.0206309	0.0289884	0.00239744	0.00413504	0.00109333	0.0053733	0.00690201	0.00220027	0.000124667
	01I	ok	3	33.1886	0.0287898	5.5632	0.0753654	46.1304	2.36561	38.8987	93.3517	4.80531	0.00420633	0.569595	2.13e-16	0.194273	8.40446e-05	0.000224905	2.36649e-06	375.697	0.0578167	72.9591	0.0294734	1.00407	0.00514236	1.99041	0.0176837	0.0863415	0.000888793	375.577	0.05414	72.9347	0.0220575	1.11715	0.00502478	2.08758	0.0162812	0.088579	0.000878871	0.323228	0.0202887	0.0289884	0.00239744	0.00413504	0.00109333	0.0053733	0.00690201	0.00219334	0.000122955
	01J	ok	3.5	33.248	0.0209075	5.49626	0.0667596	46.8656	1.95827	51.8031	95.0317	4.814	0.00305478	0.801592	2.13e-16	0.197412	7.43844e-05	0.000168048	1.61163e-06	520.31	0.0663134	102.676	0.0363673	1.40481	0.00564238	2.83472	0.018612	0.0900665	0.000838247	520.221	0.0631725	102.639	0.023366	1.51855	0.00553544	2.91871	0.0172849	0.0922902	0.000827567	0.319444	0.020167	0.0289884	0.00239744	0.00413504	0.00109333	0.0053733	0.00690201	0.00218635	0.000122592
	01K	ok	4	33.2218	0.0208307	6.33126	0.0818856	47.6621	2.19744	63.3957	96.2113	4.81017	0.00304353	0.720098	2.13e-16	0.200021	7.89462e-05	0.00012813	1.59017e-06	461.316	0.0648606	92.2362	0.0339809	1.25597	0.00557049	2.21089	0.0175112	0.0611606	0.000733306	461.188	0.0616112	92.225	0.0221764	1.37454	0.00546214	2.29466	0.0160936	0.0633681	0.000722055	0.315687	0.0202722	0.0289884	0.00239744	0.00413504	0.00109333	0.0053733	0.00690201	0.00217941	0.000123597
	01L	ok	5	33.2464	0.0163227	9.89642	0.134705	51.9914	2.01569	80.1268	97.2828	4.81377	0.0023849	1.0393	2.13e-16	0.202098	7.30647e-05	9.1868e-05	1.10082e-06	658.961	0.0726125	133.119	0.0457827	1.79193	0.00591982	2.04328	0.0183274	0.0624375	0.000725131	658.873	0.0696297	133.102	0.024965	1.91027	0.00581798	2.13356	0.0169781	0.0646387	0.000713293	0.311941	0.0205978	0.0289884	0.00239744	0.00413504	0.00109333	0.0053733	0.00690201	0.00217248	0.000125923
	01M	ok	6	33.1996	0.0228848	14.1289	0.343937	54.7342	3.51449	89.5426	97.0408	4.80692	0.0033436	0.584883	2.13e-16	0.201883	9.05589e-05	0.000100056	1.73279e-06	371.239	0.0581068	74.9142	0.0314672	1.00402	0.00561664	0.806336	0.0177377	0.0378957	0.000643012	371.093	0.0541269	74.9186	0.0218757	1.1206	0.0055092	0.910581	0.0163398	0.0400907	0.000629638	0.30819	0.0211346	0.0289884	0.00239744	0.00413504	0.00109333	0.0053733	0.00690201	0.00216555	0.000129504
	01N	ok	7	33.2741	0.0305343	18.8654	1.1071	60.8168	8.33487	94.3621	97.3735	4.81782	0.00446142	0.299378	2.13e-16	0.202116	0.000128042	8.8798e-05	2.212e-06	189.802	0.0476518	38.3452	0.022293	0.508781	0.00569662	0.309501	0.0177821	0.0171426	0.000419478	189.653	0.0423384	38.3593	0.0185776	0.626531	0.00559072	0.402974	0.016388	0.0193139	0.00039745	0.304439	0.0218668	0.0289884	0.00239744	0.00413504	0.00109333	0.0053733	0.00690201	0.00215862	0.000134239
pX	01O	ok	12	33.3915	0.0302396	16.0464	0.670215	59.175	6.72899	100	96.8771	4.83496	0.00441864	0.350212	2.13e-16	0.200373	0.000121854	0.000105596	2.22144e-06	223.962	0.0497843	44.8563	0.0253795	0.597309	0.00565759	0.42523	0.0171357	0.0240456	0.000497213	223.791	0.0442691	44.8608	0.0204457	0.722138	0.00555094	0.51372	0.0156843	0.02621	0.000477058	0.300687	0.0227755	0.0289884	0.00239744	0.00413504	0.00109333	0.0053733	0.00690201	0.00215169	0.00014001
Integrated K/Ca ±2σ						7.75099	0.169674	SD
Plateau Age ±2σ				33.2368	0.0198978	n=8/15	MSWD = 1.44	steps G-N
Total Integrated Age ±2σ				32.8107	0.0248539									K2O wt. %=6.21
Isochron Age ±2σ				33.4087	0.0199015		MSWD = *48.49
(40Ar/36Ar)trapped ±2σ				264.407	1.27841
	Sample:	18L-14			Identifier:	67861
	Material:	Hornblende
	Weight:	8.43 mg
pX	01A	ok	1.5	26.6606	0.924937	0.918267	0.0210068	20.9209	7.08825	1.6428	9.7575	3.85451	0.134701	0.013279	2.13e-16	0.0253146	7.29554e-05	0.00305389	1.02673e-05	205.231	0.0527638	5.19526	0.0149063	0.197368	0.0055885	0.855719	0.0173353	0.627546	0.00210089	205.101	0.0459823	5.2078	0.0145827	0.314449	0.00548051	0.948843	0.015902	0.629933	0.00205659	0.290152	0.0258776	0.0289884	0.00239744	0.00413504	0.00109333	0.0053733	0.00690201	0.00212412	0.000159369
pX	01B	ok	2	27.2041	0.476722	1.04821	0.0287012	79.4715	119.486	3.12812	33.4845	3.93368	0.0694468	0.012006	2.13e-16	0.0851237	0.000287969	0.00225093	1.91836e-05	55.1826	0.0422517	4.69698	0.0154713	0.0843539	0.00591689	0.67769	0.017062	0.124839	0.00105417	55.0385	0.0344613	4.71426	0.0151851	0.205461	0.005815	0.764565	0.0156036	0.127013	0.00104072	0.293672	0.0244462	0.0289884	0.00239744	0.00413504	0.00109333	0.0053733	0.00690201	0.00212209	0.000150547
pX	01C	ok	2.5	31.5538	0.357201	0.254464	0.00298912	21.1015	6.8159	4.97493	46.4476	4.56808	0.0521593	0.014928	2.13e-16	0.10168	0.000277742	0.00181224	1.70734e-05	57.4407	0.0400638	5.84685	0.0154158	0.110409	0.0059501	3.46961	0.017962	0.10731	0.000977833	57.2802	0.0326952	5.86994	0.0150984	0.22673	0.00584878	3.5723	0.016583	0.109478	0.000965335	0.297187	0.0231546	0.0289884	0.00239744	0.00413504	0.00109333	0.0053733	0.00690201	0.00212007	0.000142579
	01D	ok	3	33.1512	0.121324	0.1185	0.00122062	9.7652	0.522687	10.1067	73.1677	4.80143	0.0177314	0.0414811	2.13e-16	0.15239	0.000177178	0.000907982	8.49482e-06	106.5	0.0449484	16.2753	0.0175172	0.336168	0.0058629	20.6988	0.0185065	0.115884	0.000903147	106.344	0.0391817	16.2886	0.0166655	0.454753	0.00576006	20.7934	0.0171712	0.11805	0.000890181	0.300697	0.0220263	0.0289884	0.00239744	0.00413504	0.00109333	0.0053733	0.00690201	0.00211804	0.00013561
	01E	ok	3.5	33.3749	0.068145	0.104774	0.00107219	8.79152	0.229941	20.2371	86.4737	4.83412	0.00996059	0.0818849	2.13e-16	0.178886	0.000122432	0.000457675	5.61851e-06	179.096	0.0461297	32.1416	0.0200589	0.670285	0.00609255	46.2052	0.0203987	0.124799	0.00100387	178.929	0.0410287	32.1696	0.0177454	0.793963	0.00599365	46.31	0.0191955	0.126969	0.000992634	0.304207	0.0210853	0.0289884	0.00239744	0.00413504	0.00109333	0.0053733	0.00690201	0.00211602	0.000129787
	01F	ok	4	33.2676	0.0515778	0.0981184	0.00100307	8.38064	0.14402	34.1437	90.6493	4.81845	0.00753857	0.112409	2.13e-16	0.188134	0.000110675	0.000316363	4.40483e-06	233.772	0.0498116	44.134	0.0236573	0.931585	0.00544132	67.7204	0.0199866	0.136743	0.00102532	233.638	0.0454624	44.1579	0.0202419	1.05453	0.00533035	67.8379	0.018757	0.138914	0.00101427	0.307727	0.0203561	0.0289884	0.00239744	0.00413504	0.00109333	0.0053733	0.00690201	0.00211399	0.000125261
	01G	ok	4.5	33.2154	0.0530672	0.102257	0.00104497	8.56548	0.144225	49.9367	89.2304	4.81082	0.00775604	0.127657	2.13e-16	0.185483	9.47575e-05	0.000364381	4.56708e-06	269.277	0.0519401	50.1126	0.0230724	1.05035	0.00589848	73.7822	0.0212728	0.166537	0.0012254	269.157	0.0479915	50.1234	0.0186684	1.16727	0.00579627	73.8898	0.020122	0.168732	0.00121511	0.311252	0.0198645	0.0289884	0.00239744	0.00413504	0.00109333	0.0053733	0.00690201	0.00211196	0.000122191
	01H	ok	5	33.1522	0.0491841	0.109859	0.00112301	8.74659	0.166877	64.1717	90.482	4.80158	0.00718825	0.115063	2.13e-16	0.188447	0.000106356	0.000322024	4.19976e-06	238.895	0.0513499	45.1571	0.0230966	0.934828	0.00604312	61.8914	0.0195014	0.134333	0.000999466	238.751	0.0474499	45.1673	0.0196137	1.04801	0.0059434	62.0135	0.0182392	0.13651	0.000988812	0.314782	0.0196295	0.0289884	0.00239744	0.00413504	0.00109333	0.0053733	0.00690201	0.00210993	0.000120696
	01I	ok	5.5	33.1413	0.0538706	0.1119	0.00114461	9.17872	0.208531	75.72	92.2018	4.79999	0.00787313	0.0933462	2.13e-16	0.192092	0.000116588	0.000263822	4.72361e-06	190.128	0.0453756	36.6318	0.0200892	0.742489	0.005696	49.2861	0.0217185	0.0958783	0.000895268	190.001	0.0408987	36.6322	0.0173896	0.862178	0.00559008	49.4058	0.0205926	0.0980288	0.000885318	0.318126	0.019653	0.0289884	0.00239744	0.00413504	0.00109333	0.0053733	0.00690201	0.00210801	0.000120792
	01J	ok	6	33.1628	0.0662237	0.121918	0.00125064	9.92989	0.376554	82.9539	93.1515	4.80312	0.00967865	0.058473	2.13e-16	0.193944	0.000172026	0.000231683	5.6733e-06	117.961	0.0425901	22.94	0.0184234	0.450394	0.00570247	28.332	0.0188956	0.0536148	0.000667796	117.837	0.037645	22.9455	0.0171524	0.579504	0.00559668	28.4177	0.01759	0.0557514	0.000655865	0.321505	0.0199191	0.0289884	0.00239744	0.00413504	0.00109333	0.0053733	0.00690201	0.00210606	0.000122379
	01K	ok	6.5	33.2411	0.131611	0.0997997	0.0010435	6.61521	0.440463	85.7428	91.685	4.81458	0.0192358	0.0225425	2.13e-16	0.190437	0.000382233	0.000281312	1.06532e-05	46.3137	0.0376967	8.85001	0.016148	0.205081	0.00587374	13.3411	0.0180195	0.0254097	0.000492641	46.1775	0.0316909	8.85424	0.0157476	0.321283	0.00577108	13.4283	0.0166452	0.0275244	0.000476352	0.324854	0.020414	0.0289884	0.00239744	0.00413504	0.00109333	0.0053733	0.00690201	0.00210413	0.000125375
	01L	ok	7	33.2635	0.0993872	0.186063	0.00193902	11.4246	0.833814	89.7725	91.1641	4.81785	0.0145263	0.0325731	2.13e-16	0.189226	0.000271743	0.000298939	8.11942e-06	67.3497	0.0417809	12.765	0.016482	0.237682	0.00538951	10.3386	0.0172705	0.0297297	0.00054626	67.2269	0.0360468	12.7882	0.015854	0.354942	0.00527744	10.4349	0.0158314	0.031847	0.000530528	0.328214	0.0211251	0.0289884	0.00239744	0.00413504	0.00109333	0.0053733	0.00690201	0.0021022	0.000129705
pX	01M	ok	10	33.4849	0.0540766	0.216051	0.00222129	10.7693	0.355204	98.308	94.787	4.85021	0.00790473	0.0689933	2.13e-16	0.195434	0.000152569	0.000176332	4.56556e-06	138.123	0.0457378	27.0299	0.0190268	0.507946	0.00535747	18.856	0.0195844	0.0418637	0.000629752	138.037	0.0400832	27.0374	0.0169922	0.621197	0.00524473	18.966	0.0183279	0.0439841	0.000614743	0.331568	0.0220291	0.0289884	0.00239744	0.00413504	0.00109333	0.0053733	0.00690201	0.00210026	0.000135224
pX	01N	ok	15	35.1813	0.223564	0.0649433	0.000706231	3.73621	0.252177	100	81.1454	5.09829	0.03271	0.0136767	2.13e-16	0.159165	0.000557827	0.000638	1.45767e-05	33.6194	0.0363522	5.38054	0.0178104	0.170869	0.00638881	12.4325	0.0214761	0.0329938	0.000488796	33.4813	0.0271299	5.40118	0.0120303	0.297096	0.00432783	12.5274	0.0154042	0.0351816	0.000468736	0.289936	0.0241961	0.0286699	0.0131332	0.011212	0.00469966	-0.00939576	0.0149644	0.0021878	0.000138594
Integrated K/Ca ±2σ						0.10901	0.00222552	SD
Plateau Age ±2σ				33.2119	0.0509289	n=9/14	MSWD = 1.40	steps D-L
Total Integrated Age ±2σ				33.0458	0.0531968									K2O wt. %=0.81
Isochron Age ±2σ				33.3777	0.0464582		MSWD = *19.06
(40Ar/36Ar)trapped ±2σ				285.307	1.71135
	Sample:	18L-9			Identifier:	67294
	Material:	Hornblende
	Weight:	7.19 mg
pX	01A	ok	1.5	36.4213	0.786983	0.105708	0.00110176	2.56092	0.0974117	5.20176	11.6689	5.34395	0.116624	0.0630986	4e-16	0.0218359	4.0736e-05	0.00298921	6.93575e-06	507.309	0.0642068	11.1116	0.0206138	0.715258	0.010748	30.5399	0.0311154	1.5312	0.00351234	508.577	0.055671	11.0429	0.0131309	0.654066	0.00703793	30.6192	0.0158665	1.50604	0.00328585	1.45882	0.0285402	0.0238809	0.0139388	0.0109389	0.00666445	-0.000566327	0.0200885	0.00663169	0.000219356
	01B	ok	2	34.7871	0.0825309	0.0925024	0.000947668	-15.236	1.32808	18.4067	80.8793	5.10188	0.0122194	0.160179	4e-16	0.158532	0.000139148	0.000647005	5.97879e-06	177.387	0.0478073	28.2205	0.0234817	0.263003	0.0106748	88.5796	0.0324034	0.157524	0.00103411	178.583	0.0365346	28.0833	0.0158457	0.368724	0.00666482	88.6767	0.0203454	0.16075	0.000985803	1.42431	0.0270597	0.0245799	0.0132294	0.0108131	0.00632247	0.00336922	0.0190514	0.00649423	0.000207853
	01C	ok	2.5	34.6092	0.059753	0.0909227	0.00093073	15.2104	1.05955	33.3574	90.3454	5.07555	0.00884607	0.181355	4e-16	0.178005	0.000142511	0.000326652	4.68495e-06	178.867	0.0487275	31.9533	0.0239585	0.563702	0.00964403	102.015	0.0314637	0.107688	0.00079364	180.034	0.0386512	31.7941	0.0168444	0.670241	0.00508575	102.121	0.0198444	0.111822	0.000748498	1.38971	0.0256771	0.0252808	0.0125788	0.010687	0.00600631	0.00731543	0.0180872	0.0063564	0.000197002
	01D	ok	3	34.5812	0.0507545	0.0902633	0.000922785	15.9065	0.811044	54.5997	92.1294	5.0714	0.00751378	0.257674	4e-16	0.181669	0.00011359	0.000266277	4.15499e-06	249.014	0.0512502	45.4015	0.0266932	0.789409	0.0095259	145.98	0.0302874	0.13681	0.000960686	250.135	0.0427772	45.1838	0.0178704	0.908361	0.00503334	146.095	0.0209342	0.140212	0.000917637	1.3553	0.0244201	0.0259779	0.0120017	0.0105615	0.00572282	0.0112403	0.0172158	0.00621931	0.000187006
	01E	ok	3.5	34.5007	0.0696647	0.0882279	0.000903134	15.8212	1.11581	68.5979	85.5521	5.05949	0.0103128	0.169802	4e-16	0.169096	0.00013368	0.000488867	5.35685e-06	176.295	0.0475459	29.9212	0.0221435	0.529471	0.00878818	98.4	0.0322339	0.133716	0.000907834	177.371	0.0392347	29.7825	0.0154483	0.649135	0.0049115	98.5188	0.0209286	0.137023	0.000866678	1.3207	0.0232945	0.0266788	0.0115025	0.0104353	0.00547377	0.0151865	0.016442	0.00608148	0.00017789
	01F	ok	4	34.7425	0.08909	0.0907211	0.000933973	15.1484	1.9294	76.4425	95.1988	5.09529	0.0131902	0.0951569	4e-16	0.186841	0.000248815	0.000162399	7.13031e-06	89.4128	0.0418039	16.766	0.0208241	0.29308	0.00933751	53.6194	0.0296894	0.0404258	0.000621546	90.4801	0.0317955	16.6678	0.0152686	0.399965	0.00509139	53.7224	0.0178644	0.0455396	0.000583753	1.28783	0.0223726	0.0273447	0.0111135	0.0103155	0.00527526	0.0189354	0.0158156	0.00595055	0.000170237
	01G	ok	4.5	34.6561	0.0905467	0.0907338	0.000935163	14.3647	1.92796	83.4301	95.3945	5.08249	0.0134052	0.0847612	4e-16	0.187697	0.000268437	0.000155777	7.13286e-06	79.2816	0.0382354	14.9344	0.0200291	0.264523	0.00924565	47.7471	0.0256756	0.0354223	0.000551209	80.3136	0.0284709	14.8532	0.0151429	0.376419	0.00548696	47.855	0.0167193	0.0405112	0.000513821	1.25482	0.0216102	0.0280134	0.0108156	0.0101951	0.00511767	0.0227003	0.0153064	0.00581905	0.000163679
	01H	ok	5	34.7942	0.124316	0.090491	0.000942358	17.0519	4.04522	88.2269	96.0071	5.10294	0.0184061	0.0581862	4e-16	0.188145	0.000385396	0.000135043	9.6162e-06	54.295	0.0415662	10.2521	0.0194031	0.173926	0.0094625	32.8597	0.0276794	0.0232127	0.000514692	55.2723	0.0332061	10.2008	0.0140438	0.289441	0.00552295	32.9713	0.0156255	0.0284196	0.00047824	1.22148	0.0210246	0.0286887	0.0106171	0.0100735	0.00500503	0.0265025	0.0149267	0.00568625	0.000158345
	01I	ok	5.5	34.9595	0.229294	0.0899918	0.00100767	19.9429	11.4776	90.3911	98.1154	5.12742	0.0339521	0.0262519	4e-16	0.191359	0.00086853	6.36942e-05	1.59772e-05	24.0848	0.0365697	4.62556	0.019708	0.0755486	0.0088601	14.9051	0.025561	0.00873854	0.000382587	25.0179	0.0270455	4.61068	0.0142748	0.182554	0.00508776	15.0254	0.0152424	0.0141151	0.000341268	1.18796	0.0206384	0.0293678	0.010527	0.00995131	0.0049421	0.0303261	0.0146916	0.0055527	0.000154425
	01J	ok	6	34.9914	0.579099	0.0887218	0.00147502	5696.35	2.82307e+06	91.1057	99.8885	5.13213	0.0857501	0.00866886	4e-16	0.194638	0.00253491	3.68925e-06	3.537e-05	7.81928	0.0368326	1.52753	0.0184745	0.019808	0.00882406	4.99086	0.0247804	0.00244172	0.000275987	8.70583	0.0256134	1.51736	0.0132061	0.130371	0.00483861	5.10958	0.0152794	0.00770143	0.00022386	1.12512	0.0204974	0.0306408	0.0106612	0.00972218	0.00496566	0.0374933	0.014669	0.00530237	0.000151333
	01K	ok	6.5	33.2777	1.46186	0.091989	0.00329637	-8.45339	15.2901	91.3918	82.343	4.8785	0.216262	0.00347038	4e-16	0.168791	0.00556847	0.000597468	8.04396e-05	3.6096	0.0362102	0.611427	0.0191434	0.00350026	0.00869004	1.92671	0.0266141	0.00308797	0.000289208	4.47346	0.0254343	0.602218	0.0136786	0.112666	0.00522794	2.0638	0.0152169	0.00820083	0.000238906	1.0923	0.0207303	0.0313057	0.0108845	0.0096025	0.00505065	0.0412368	0.0148746	0.00517162	0.000152017
	01L	ok	7	33.5156	1.91721	0.0943726	0.00450827	-2.04806	1.36005	91.6031	80.6877	4.9137	0.283662	0.00256281	4e-16	0.164213	0.00725027	0.00065349	9.84952e-05	2.73993	0.0357706	0.451484	0.0189722	-0.00848532	0.00971717	1.38668	0.0275968	0.00246039	0.000268491	3.55747	0.0253954	0.438009	0.0128983	0.105292	0.00478328	1.51817	0.0147922	0.00744961	0.000212884	1.05933	0.0211687	0.0319735	0.0112072	0.0094823	0.00518342	0.0449964	0.0152247	0.00504031	0.00015428
pX	01M	ok	10	35.1293	0.100612	0.0896026	0.000922845	19.081	3.05033	98.9975	90.1688	5.15255	0.0148992	0.0896963	4e-16	0.175002	0.000237849	0.00033263	7.74043e-06	89.9836	0.0410383	15.8047	0.0201551	0.265203	0.00877491	51.108	0.0285019	0.0546537	0.000683105	90.7925	0.030779	15.7448	0.0140136	0.386688	0.00489238	51.2609	0.0170475	0.0584306	0.00064901	1.02642	0.0217985	0.0326403	0.0116196	0.00936228	0.00535989	0.0487506	0.0157081	0.00490918	0.000158047
pX	01N	ok	15	35.2042	0.509734	0.0924937	0.00133466	-21.8535	29.8255	100	78.2244	5.16366	0.0754876	0.0121602	4e-16	0.151493	0.00147642	0.000736856	2.83012e-05	14.0922	0.0387125	2.14239	0.0199574	0.0231084	0.00888585	6.71109	0.0272901	0.01363	0.000397181	14.8338	0.0269733	2.12414	0.0138908	0.139983	0.00470278	6.8604	0.0151612	0.0181254	0.000352926	0.993594	0.0226018	0.0333052	0.0121116	0.0092426	0.00557538	0.0524942	0.0163117	0.00477843	0.0001632
Integrated K/Ca ±2σ						0.0904608	0.00184768	SD
Plateau Age ±2σ				34.6344	0.0668554	n=11/14	MSWD = 1.52	steps B-L
Total Integrated Age ±2σ				34.7771	0.0973771									K2O wt. %=1.21
Isochron Age ±2σ				34.6455	0.0599786		MSWD = *3.26
(40Ar/36Ar)trapped ±2σ				297.396	1.38492
	Sample:	18L-12			Identifier:	67297
	Material:	Hornblende
	Weight:	8.93 mg
pX	01A	ok	1.5	34.3348	0.646085	0.155053	0.00161318	13.6616	1.83642	3.85547	12.1025	5.0338	0.0956131	0.062453	4e-16	0.0240425	3.84004e-05	0.00297453	5.89305e-06	566.523	0.0622588	13.6482	0.0216985	0.554338	0.00888965	25.382	0.031848	1.6975	0.00333265	567.287	0.0536445	13.57	0.0138833	0.658632	0.00447628	25.5424	0.0149887	1.66829	0.00306397	0.999218	0.027998	0.0250699	0.0139429	-0.00244633	0.0061352	0.0605006	0.0213119	0.0060294	0.00022841
pX	01B	ok	2	35.8076	0.0802341	0.12236	0.00125212	9.87791	0.3994	14.357	73.3926	5.25185	0.0118833	0.170109	4e-16	0.139749	9.86574e-05	0.000900375	5.10119e-06	265.479	0.0508935	37.1972	0.0251974	0.76815	0.0099421	87.591	0.0316771	0.281688	0.00133332	266.204	0.0404846	37.024	0.0172387	0.864536	0.00564046	87.7623	0.0183783	0.281717	0.00127491	0.973877	0.0263418	0.0243401	0.0131123	-0.00144879	0.00577553	0.058699	0.0200504	0.00587807	0.000214388
pX	01C	ok	2.5	35.2193	0.0540022	0.121834	0.00124535	9.79735	0.278512	28.6147	85.8817	5.16472	0.00799557	0.230953	4e-16	0.166289	9.43052e-05	0.000477714	4.09667e-06	302.909	0.054794	50.5022	0.0270579	1.0121	0.00939853	119.411	0.0319608	0.202871	0.00119948	303.591	0.046527	50.256	0.0191661	1.11983	0.00494974	119.522	0.0209445	0.204394	0.00114968	0.94863	0.0248575	0.0236131	0.0123626	-0.000454958	0.00545613	0.056904	0.0189189	0.0057273	0.000201361
	01D	ok	3	34.988	0.0619953	0.120962	0.00123571	10.0899	0.223733	47.3397	74.7377	5.13048	0.00917787	0.303319	4e-16	0.145677	6.57702e-05	0.000854853	4.12233e-06	454.108	0.0621157	66.3277	0.0284443	1.35367	0.00912161	157.928	0.0356896	0.465136	0.00182368	454.842	0.0555656	66.0176	0.0182763	1.46045	0.00492733	158.076	0.026506	0.461067	0.00174996	0.923288	0.0235656	0.0228833	0.0117033	0.000542587	0.00518186	0.0551024	0.0179332	0.00557597	0.000189427
	01E	ok	3.5	34.8399	0.0741568	0.120073	0.00122731	9.50619	0.263172	61.3697	72.3479	5.10856	0.0109774	0.227264	4e-16	0.141624	7.90138e-05	0.000935729	4.81427e-06	349.982	0.0585833	49.6977	0.0263662	1.04148	0.00926548	119.183	0.0313335	0.385563	0.001654	350.617	0.0519661	49.4694	0.0185259	1.1408	0.00545704	119.31	0.0200947	0.382989	0.00159024	0.897821	0.0225015	0.0221499	0.0111515	0.00154508	0.00496075	0.0532918	0.01712	0.00542388	0.000178817
	01F	ok	4	35.0281	0.0628231	0.115825	0.00118752	9.44846	0.47552	68.5699	95.5772	5.13642	0.00930062	0.116633	4e-16	0.186082	0.000173334	0.000149595	5.00605e-06	136.7	0.043457	25.5078	0.0222631	0.50852	0.0089268	63.3983	0.0301922	0.0513497	0.00066315	137.343	0.035369	25.38	0.0159532	0.605766	0.00522297	63.5304	0.017288	0.0555835	0.000625575	0.87575	0.021796	0.0215143	0.0107765	0.00241391	0.00481918	0.0517227	0.0165794	0.00529208	0.000170944
	01G	ok	4.5	35.0147	0.0741133	0.118228	0.00121318	9.50118	0.525892	74.6007	93.646	5.13444	0.010972	0.0976907	4e-16	0.182392	0.000183828	0.000214951	5.94559e-06	116.815	0.0421033	21.3638	0.0200462	0.42629	0.00819272	52.0143	0.0277445	0.050465	0.000680487	117.393	0.0341954	21.2553	0.0141041	0.527738	0.00461844	52.1487	0.0163694	0.0545791	0.000644913	0.853521	0.0213103	0.0208741	0.0105066	0.00328893	0.00472808	0.0501423	0.0162056	0.00515933	0.000164444
	01H	ok	5	34.9573	0.0947725	0.118307	0.00121663	10.7301	0.812703	80.0366	83.4046	5.12594	0.01403	0.0880541	4e-16	0.162714	0.00019177	0.000561546	6.87659e-06	118.025	0.0431797	19.2563	0.0215086	0.376985	0.00898345	46.8365	0.0285881	0.089114	0.000801535	118.569	0.0335418	19.1497	0.0155158	0.481065	0.00507376	46.9449	0.0180116	0.0921603	0.000766974	0.808655	0.0210735	0.0195821	0.0103223	0.00505505	0.00471204	0.0469526	0.0160155	0.0048914	0.000156382
pX	01I	ok	5.5	35.2682	0.0782453	0.11201	0.00115413	8.97683	0.686859	84.6471	98.757	5.17196	0.0115853	0.0746832	4e-16	0.190951	0.000259813	4.19829e-05	5.94117e-06	85.3008	0.0400536	16.335	0.0207938	0.330263	0.00920465	41.9511	0.0269508	0.0240415	0.000494221	85.8333	0.0315175	16.2456	0.0161632	0.43185	0.00531392	42.0704	0.0163629	0.0283027	0.000458142	0.786269	0.0213353	0.0189374	0.0104171	0.00593626	0.00478853	0.0453611	0.0162096	0.00475772	0.000155152
pX	01J	ok	6	35.4547	0.192359	0.115332	0.00127166	10.9944	3.09016	86.1538	99.2568	5.19958	0.0284844	0.0244064	4e-16	0.190899	0.000743179	2.50675e-05	1.29325e-05	27.8839	0.0388835	5.33777	0.0193425	0.100475	0.00906137	13.3125	0.0273277	0.00719248	0.000358613	28.4049	0.0278292	5.30958	0.0139637	0.203254	0.00486212	13.444	0.0142056	0.0116689	0.000314658	0.764166	0.0218331	0.0183009	0.0106297	0.00680632	0.00491644	0.0437897	0.0165833	0.00462573	0.000155841
pX	01K	ok	6.5	34.9936	0.0873803	0.119138	0.0012259	12.3584	1.05972	91.4018	91.2288	5.13131	0.0129359	0.0850089	4e-16	0.177793	0.000214988	0.000296756	6.78882e-06	104.28	0.0419738	18.59	0.0211333	0.342483	0.00853254	44.8799	0.0302245	0.0528396	0.000697561	104.756	0.0333238	18.475	0.0152134	0.450319	0.00516059	44.9995	0.0180492	0.0562413	0.000663562	0.742032	0.022554	0.0176635	0.0109542	0.00767763	0.00509277	0.042216	0.017127	0.00449355	0.000158401
pX	01L	ok	15	34.9507	0.0561372	0.11603	0.00118829	9.71933	0.424892	100	94.3116	5.12496	0.00831047	0.139279	4e-16	0.184028	0.000150272	0.000192425	4.449e-06	165.064	0.0452713	30.4602	0.0233529	0.602621	0.00896829	75.4886	0.0308965	0.0685964	0.000706271	165.542	0.0362282	30.3121	0.0152684	0.704143	0.00504244	75.6138	0.0179085	0.071541	0.000670694	0.719834	0.0234799	0.0170242	0.0113822	0.00855141	0.00531325	0.0406379	0.017827	0.00436099	0.000162759
Integrated K/Ca ±2σ						0.119373	0.00243748	SD
Plateau Age ±2σ				34.9725	0.0666557	n=5/12	MSWD = 1.10	steps D-H
Total Integrated Age ±2σ				35.081	0.0671123									K2O wt. %=1.62
Isochron Age ±2σ				35.106	0.0676293		MSWD = *13.02
(40Ar/36Ar)trapped ±2σ				295.224	1.10548
	Sample:	18L-11A			Identifier:	67296
	Material:	Hornblende
	Weight:	9.09 mg
X	01A	outlier	1.5	46.8011	0.219407	0.114986	0.00117607	8.71813	0.314945	14.3438	36.4608	6.88753	0.0327037	0.190421	4e-16	0.0529378	3.37382e-05	0.00215022	4.51945e-06	798.26	0.0727415	42.3766	0.0266481	1.18565	0.0114082	106.453	0.03146	1.76813	0.00359322	799.058	0.0655664	42.1967	0.0163582	1.10721	0.00538851	106.62	0.0191387	1.73649	0.00332156	0.990276	0.0279114	0.0312653	0.0148047	-0.003746	0.00800355	0.0559202	0.019341	0.00502983	0.000186876
X	01B	outlier	2	38.2513	0.0554394	0.0978815	0.00100142	7.64698	0.258629	26.8927	94.1514	5.61612	0.00822504	0.166592	4e-16	0.167649	0.000120945	0.000197854	4.03864e-06	220.524	0.0511274	37.0932	0.0252446	0.807918	0.0106451	109.387	0.0311625	0.0967747	0.000842181	221.339	0.0412848	36.92	0.0150066	0.733494	0.00544765	109.555	0.0202691	0.0998868	0.000803315	0.992746	0.0261174	0.0308659	0.0138381	-0.0037228	0.00746043	0.0563834	0.0181322	0.00511357	0.000175646
	01C	ok	2.5	36.534	0.0547617	0.0999407	0.00102303	8.34962	0.317361	38.0813	96.8629	5.36145	0.00811687	0.148533	4e-16	0.180669	0.000142113	0.000106088	4.23056e-06	182.448	0.0482515	33.0696	0.0244074	0.691919	0.00981131	95.5043	0.0318726	0.0657608	0.000729212	183.234	0.0390059	32.931	0.0164987	0.621258	0.00480321	95.6431	0.0207959	0.0695961	0.000692976	0.995083	0.0246085	0.030488	0.0130121	-0.00370085	0.00697857	0.0568217	0.017145	0.0051928	0.000166864
	01D	ok	3	36.7271	0.0616401	0.104632	0.0010708	9.20531	0.404225	48.9849	90.9761	5.39007	0.00913737	0.144751	4e-16	0.168788	0.000127142	0.000305309	4.63354e-06	190.318	0.0489079	32.2226	0.0227355	0.656647	0.0100646	88.8719	0.0294286	0.101301	0.000849691	191.097	0.0414224	32.0698	0.0152128	0.751506	0.00527876	89.0177	0.0190149	0.104548	0.000814651	0.999664	0.0223232	0.0297473	0.0117117	-0.00365781	0.0061524	0.0576808	0.0157587	0.00534811	0.000155978
	01E	ok	3.5	36.5319	0.0616524	0.102391	0.00104829	9.01575	0.391083	58.7397	93.3203	5.36114	0.00913821	0.129499	4e-16	0.174072	0.000139483	0.000225977	4.72415e-06	165.097	0.0455954	28.8295	0.0216075	0.589571	0.0090781	81.2342	0.0290381	0.0767974	0.000749552	165.856	0.0378312	28.6835	0.014605	0.681	0.00485223	81.3653	0.0200148	0.080641	0.000715879	1.00201	0.0215722	0.0293684	0.011248	-0.0036358	0.0058078	0.0581204	0.0153818	0.00542756	0.000154113
pX	01F	ok	4	36.4272	0.0721491	0.106721	0.00109614	9.03138	0.564015	65.4835	96.3608	5.34561	0.0106934	0.0895269	4e-16	0.180266	0.000201686	0.000123077	5.39321e-06	110.216	0.040875	19.9281	0.0209648	0.4044	0.00908735	53.8729	0.0272148	0.0397582	0.000576896	110.967	0.0318625	19.8378	0.0151413	0.493446	0.00509688	54.017	0.0171523	0.0444493	0.000542619	1.0044	0.0211427	0.0289819	0.0109409	-0.00361335	0.00552479	0.0585686	0.0152551	0.0055086	0.000154956
pX	01G	ok	4.5	36.7148	0.134513	0.10156	0.00104496	8.77399	0.624254	71.198	72.0216	5.38824	0.0199396	0.075862	4e-16	0.133667	0.000168295	0.000946774	8.29331e-06	125.951	0.0449117	16.8891	0.0203233	0.36719	0.00904334	47.9608	0.0254603	0.142568	0.00103584	126.692	0.0358968	16.8033	0.0148913	0.463635	0.00525492	48.1267	0.0165663	0.145209	0.00099749	1.00712	0.0210926	0.0285422	0.0108129	-0.0035878	0.00530071	0.0590786	0.0154349	0.00560079	0.000159222
pX	01H	ok	5	36.7861	0.0918056	0.0997561	0.00102821	8.45552	0.61851	76.2406	95.6307	5.39882	0.0136094	0.0669436	4e-16	0.177137	0.000250503	0.000147789	6.73005e-06	83.8694	0.0428039	14.9046	0.0195874	0.311073	0.00851706	43.0808	0.0263834	0.0333484	0.000552615	84.6314	0.0332923	14.8413	0.0137027	0.407926	0.00468669	43.2545	0.0164943	0.038336	0.000514753	1.00946	0.0214257	0.0281638	0.0108974	-0.00356582	0.00520118	0.0595175	0.015857	0.00568014	0.000165515
pX	01I	ok	5.5	36.8625	0.106355	0.0991572	0.00102891	10.6087	1.19924	80.3039	96.9337	5.41015	0.015767	0.0539424	4e-16	0.179174	0.000324223	0.000103691	7.47358e-06	66.8125	0.0420326	12.0102	0.0203049	0.230989	0.00847665	34.9181	0.0285116	0.023913	0.000490474	67.5706	0.0310025	11.9443	0.0148682	0.330494	0.0044799	35.0811	0.0166066	0.0291759	0.00044741	1.0118	0.022091	0.0277854	0.0111582	-0.00354383	0.0051934	0.0599564	0.0165072	0.00575948	0.00017396
pX	01J	ok	6	38.938	0.23979	0.103032	0.00108209	8.46003	0.970639	83.5636	55.9704	5.718	0.0355888	0.0432734	4e-16	0.0978858	0.000221847	0.00148998	1.06358e-05	98.1068	0.0427283	9.63348	0.021354	0.226715	0.00865263	26.949	0.0298001	0.159289	0.00103893	98.8639	0.0316539	9.57209	0.0152678	0.318469	0.00481989	27.1153	0.0157786	0.161914	0.000992572	1.0168	0.0244866	0.0269758	0.0122457	-0.0034968	0.00548053	0.0608953	0.0185415	0.00592921	0.000197886
X	01K	outlier	6.5	37.5906	0.119771	0.10562	0.00110504	9.52233	1.1446	87.1536	98.3186	5.5181	0.0177629	0.047659	4e-16	0.178179	0.000389146	5.68238e-05	7.85447e-06	59.3596	0.0430412	10.6089	0.0217832	0.210616	0.00887386	28.9483	0.0301711	0.017462	0.000459641	60.1119	0.0307755	10.5503	0.0149642	0.303115	0.00451058	29.0877	0.0178924	0.0231133	0.000397284	1.01914	0.0259801	0.0265974	0.0129615	-0.00347482	0.00574304	0.0613343	0.0197334	0.00600856	0.00021121
X	01L	outlier	15	40.2208	0.0555895	0.100901	0.00103221	9.23793	0.331908	100	92.5868	5.90847	0.00825618	0.170541	4e-16	0.156705	0.000109043	0.000250807	3.76166e-06	241.517	0.0560315	37.9684	0.0248175	0.772288	0.00959732	108.412	0.0336372	0.113347	0.000861667	242.316	0.0452536	37.795	0.0164055	0.864683	0.00492974	108.568	0.0219142	0.117095	0.000809124	1.02183	0.0279205	0.0261637	0.0139104	-0.00344962	0.0061275	0.0618374	0.0212447	0.00609951	0.000227752
Integrated K/Ca ±2σ						0.10226	0.00208913	SD
Plateau Age ±2σ				36.5925	0.126453	n=3/12	MSWD = 3.44	steps C-E
Total Integrated Age ±2σ				38.8654	0.0753649									K2O wt. %=1.33
Isochron Age ±2σ				36.471	0.0806348		MSWD = *7.45
(40Ar/36Ar)trapped ±2σ				312.629	4.07309
	Sample:	18L-11B			Identifier:	67851
	Material:	Biotite
	Weight:	2.31 mg
X	01A	outlier	0.5	36.6399	3.32981	3.44862	0.571268	13.8443	7.4029	0.332714	3.18711	5.32209	0.488525	0.0211956	2.13e-16	0.00598846	4.13265e-05	0.00327624	8.16762e-06	378.723	0.062036	2.26726	0.0156401	0.271167	0.00580432	0.101983	0.0168272	1.24088	0.00308649	378.923	0.0565212	2.25287	0.0153829	0.374151	0.00570042	0.198414	0.0153465	1.2447	0.00297782	0.635676	0.0255701	0.0289884	0.00239744	0.00413504	0.00109333	0.0053733	0.00690201	0.00330081	0.0001782
pX	01B	ok	0.8	36.1662	0.260663	14.5134	2.34778	63.0824	31.3836	1.78872	46.157	5.25261	0.0382326	0.092755	2.13e-16	0.0878755	0.000140058	0.00182208	1.06163e-05	112.945	0.0437557	9.92097	0.0153373	0.169048	0.00520516	0.106384	0.0170984	0.205888	0.00119627	113.084	0.0364309	9.90731	0.0147419	0.274188	0.00508904	0.215856	0.0156434	0.20924	0.00117743	0.631618	0.0242353	0.0289884	0.00239744	0.00413504	0.00109333	0.0053733	0.00690201	0.00326584	0.000168593
pX	01C	ok	1	35.4898	0.135602	45.4269	19.0789	79.2904	46.0362	3.57442	78.1407	5.15341	0.0198821	0.113759	2.13e-16	0.151632	0.000221526	0.000739688	9.304e-06	80.2774	0.0410547	12.1673	0.0166498	0.168439	0.00593109	0.0420683	0.0174223	0.0594177	0.000746087	80.4228	0.033947	12.1508	0.0159734	0.271422	0.00582945	0.158323	0.0159968	0.0626748	0.000728028	0.627751	0.0230888	0.0289884	0.00239744	0.00413504	0.00109333	0.0053733	0.00690201	0.00323253	0.000160084
pX	01D	ok	1.5	35.2617	0.0447817	37.3621	2.70782	55.3064	4.64718	12.1158	86.8313	5.11997	0.0065651	0.544129	2.13e-16	0.169597	8.24673e-05	0.000445577	3.39426e-06	343.308	0.0541778	58.1985	0.0267548	0.802339	0.0057468	0.244023	0.0173104	0.153192	0.00116487	343.454	0.0494916	58.1129	0.0200507	0.904954	0.00564184	0.3341	0.0158749	0.156461	0.00115121	0.623703	0.0220413	0.0289884	0.00239744	0.00413504	0.00109333	0.0053733	0.00690201	0.00319766	0.000151971
	01E	ok	1.75	35.1261	0.0244343	50.7926	2.62708	52.9229	2.39991	28.3832	93.7786	5.10009	0.00358186	1.03632	2.13e-16	0.183881	7.01291e-05	0.000210461	1.83176e-06	603.058	0.0742084	110.842	0.0399777	1.5032	0.00583174	0.343187	0.0171289	0.127237	0.00110439	603.236	0.071125	110.672	0.0237503	1.61001	0.00572834	0.453101	0.0156768	0.130461	0.00109227	0.619639	0.021169	0.0289884	0.00239744	0.00413504	0.00109333	0.0053733	0.00690201	0.00316264	0.000144774
	01F	ok	2	35.0646	0.0208103	50.9677	2.49064	48.8694	1.89886	46.4285	95.0162	5.09108	0.00305051	1.14958	2.13e-16	0.186637	6.8354e-05	0.000168579	1.4936e-06	659.088	0.0710562	122.956	0.0429954	1.67477	0.00590243	0.379344	0.0178429	0.111461	0.000984161	659.262	0.0680344	122.77	0.0255334	1.77927	0.00580029	0.493774	0.0164539	0.114637	0.00097212	0.615587	0.0205011	0.0289884	0.00239744	0.00413504	0.00109333	0.0053733	0.00690201	0.00312772	0.000138691
	01G	ok	2.5	35.0743	0.0196543	54.77	2.43661	51.2863	1.94969	66.0369	95.5786	5.0925	0.00288107	1.24916	2.13e-16	0.18769	6.74922e-05	0.000149546	1.38617e-06	712.16	0.0719945	133.606	0.046061	1.80856	0.00589266	0.383958	0.0163421	0.106857	0.00098696	712.324	0.0691444	133.395	0.0276534	1.91649	0.00579034	0.463079	0.014813	0.109995	0.000975843	0.611545	0.0200562	0.0289884	0.00239744	0.00413504	0.00109333	0.0053733	0.00690201	0.0030929	0.000133862
	01H	ok	2.75	35.0837	0.0276036	38.5096	2.85262	47.6752	3.80379	73.9972	96.5932	5.09388	0.00404636	0.507114	2.13e-16	0.189631	9.31357e-05	0.000115209	2.02521e-06	286.153	0.0519751	54.2394	0.024736	0.737663	0.00592381	0.220579	0.0159942	0.0331715	0.000579281	286.31	0.0480347	54.1728	0.0196326	0.845122	0.00582204	0.318227	0.0144283	0.0362477	0.000564226	0.607695	0.0198513	0.0289884	0.00239744	0.00413504	0.00109333	0.0053733	0.00690201	0.00305973	0.000130537
	01I	ok	3	35.1139	0.0337189	38.2178	4.14604	44.6283	4.16875	79.8678	96.5543	5.0983	0.00494287	0.373992	2.13e-16	0.18939	0.000115076	0.000116526	2.45209e-06	211.304	0.0491205	40.0011	0.022447	0.547899	0.00550257	0.163877	0.0174947	0.0247744	0.000517838	211.429	0.0449232	39.9383	0.0194007	0.654723	0.00539285	0.256868	0.0160757	0.027811	0.000501599	0.603822	0.0198676	0.0289884	0.00239744	0.00413504	0.00109333	0.0053733	0.00690201	0.00302636	0.000128547
X	01J	outlier	3.5	35.2906	0.026204	212.6	105.33	37.0369	2.53104	87.2259	97.8961	5.1242	0.00384162	0.468749	2.13e-16	0.191051	9.55843e-05	7.11163e-05	1.8408e-06	262.538	0.0510163	50.1356	0.0231005	0.699701	0.00604857	0.0388507	0.018075	0.0187125	0.000482968	262.722	0.0468876	50.0627	0.0182499	0.803242	0.00594894	0.131852	0.0167053	0.0217134	0.000465756	0.599966	0.020105	0.0289884	0.00239744	0.00413504	0.00109333	0.0053733	0.00690201	0.00299314	0.000127979
pX	01K	ok	4	35.0236	0.0406055	112.057	50.6768	41.0835	4.88528	91.5945	96.3818	5.08507	0.00595209	0.278304	2.13e-16	0.189543	0.000140009	0.000122365	2.94335e-06	157.113	0.0441246	29.7664	0.0203305	0.411682	0.00569848	0.0425003	0.0185823	0.0192667	0.000462081	157.244	0.0390443	29.7354	0.018283	0.509699	0.00559261	0.125122	0.017253	0.0222346	0.000443783	0.59611	0.0205553	0.0289884	0.00239744	0.00413504	0.00109333	0.0053733	0.00690201	0.00295991	0.000128839
pX	01L	ok	5	35.0576	0.0574124	93.8396	46.3671	48.8673	8.69742	94.8647	92.2016	5.09006	0.00841585	0.208325	2.13e-16	0.181145	0.000165164	0.000263833	4.25613e-06	123.06	0.0433555	22.2817	0.0187347	0.305798	0.00538336	0.0377804	0.018146	0.0325028	0.000523354	123.191	0.0378159	22.267	0.0173435	0.407141	0.00527117	0.156057	0.0167821	0.0354485	0.000506462	0.592254	0.0212051	0.0289884	0.00239744	0.00413504	0.00109333	0.0053733	0.00690201	0.00292669	0.0001311
pX	01M	ok	6	35.0416	0.0915605	74.8174	63.1353	61.786	32.3377	96.3555	95.7129	5.0877	0.0134214	0.0949772	2.13e-16	0.188131	0.000342766	0.000144999	6.13529e-06	54.0208	0.0382068	10.1584	0.0170555	0.135212	0.00573025	0.0214789	0.0177208	0.00785292	0.000330983	54.1171	0.0312113	10.1512	0.0165499	0.238181	0.00562498	0.12416	0.0163215	0.0107496	0.000302446	0.588398	0.0220366	0.0289884	0.00239744	0.00413504	0.00109333	0.0053733	0.00690201	0.00289347	0.00013469
pX	01N	ok	7	35.0222	0.0515319	346.399	712.97	50.9467	11.8042	99.2098	97.5841	5.08487	0.00755371	0.181833	2.13e-16	0.191916	0.000198258	8.16748e-05	3.50861e-06	101.383	0.0425644	19.4481	0.0183538	0.262052	0.00587805	0.00959661	0.0178709	0.00829065	0.00035531	101.487	0.0357938	19.4284	0.0170569	0.368691	0.00577548	0.12074	0.0164843	0.0111542	0.000326886	0.584531	0.0230333	0.0289884	0.00239744	0.00413504	0.00109333	0.0053733	0.00690201	0.00286015	0.000139524
pX	01O	ok	12	35.1782	0.166534	19.3695	7.90947	26.4326	11.2677	100	94.4495	5.10774	0.0244131	0.0503387	2.13e-16	0.184919	0.000612564	0.000187759	1.0912e-05	29.1288	0.0382457	5.38414	0.0163737	0.0797007	0.00578398	0.0432344	0.017545	0.00550936	0.000317361	29.2288	0.0296393	5.39001	0.016049	0.178594	0.00567971	0.121842	0.0161304	0.00834128	0.000282189	0.580669	0.0241712	0.0289884	0.00239744	0.00413504	0.00109333	0.0053733	0.00690201	0.00282688	0.000145459
Integrated K/Ca ±2σ						48.6495	2.70367	SD
Plateau Age ±2σ				35.087	0.0233547	n=5/15	MSWD = 1.20	steps E-I
Total Integrated Age ±2σ				35.1406	0.0301624									K2O wt. %=6.37
Isochron Age ±2σ				35.0266	0.029689		MSWD = 1.02
(40Ar/36Ar)trapped ±2σ				305.389	3.15801
	Sample:	18L-11B			Identifier:	67852
	Material:	Hornblende
	Weight:	8.97 mg
	01A	ok	1.5	38.7068	0.917303	0.179419	0.00202788	14.4642	3.18329	1.77456	14.2305	5.62996	0.134839	0.013076	2.13e-16	0.0252764	7.55738e-05	0.00290252	1.03277e-05	214.778	0.0532875	5.43819	0.0161656	0.210032	0.00548074	4.67352	0.0179056	0.627634	0.00221265	214.889	0.0455782	5.44662	0.0158308	0.308681	0.00537058	4.7868	0.0165219	0.630619	0.00217031	0.566729	0.0276078	0.0289884	0.00239744	0.00413504	0.00109333	0.0053733	0.00690201	0.00272286	0.000164852
	01B	ok	2	39.5547	0.115467	0.109333	0.00111884	14.4608	0.55051	12.667	66.6483	5.75463	0.0169809	0.0802616	2.13e-16	0.115819	7.65879e-05	0.00112862	6.18428e-06	287.715	0.0537977	33.4262	0.0208943	0.641957	0.00569628	47.0664	0.0207087	0.367401	0.00177703	287.822	0.0471318	33.3994	0.0176868	0.750559	0.00559038	47.1825	0.0195246	0.370301	0.00175518	0.567036	0.0259381	0.0289884	0.00239744	0.00413504	0.00109333	0.0053733	0.00690201	0.00274235	0.000155318
	01C	ok	2.5	38.1225	0.0564317	0.105916	0.00108225	13.3689	0.282895	31.7139	83.83	5.54409	0.00829252	0.140349	2.13e-16	0.151209	7.56815e-05	0.000547153	3.88012e-06	385.36	0.0603958	58.457	0.0271011	1.07892	0.00568447	84.9433	0.0204407	0.287896	0.00149048	385.482	0.0552417	58.3831	0.0201874	1.18315	0.00557834	85.0524	0.0192402	0.29079	0.00147227	0.567339	0.0244131	0.0289884	0.00239744	0.00413504	0.00109333	0.0053733	0.00690201	0.00276162	0.000146993
	01D	ok	3	37.3302	0.0556461	0.107129	0.00109475	14.5195	0.389712	47.9361	88.1618	5.4277	0.00817354	0.119535	2.13e-16	0.162433	8.24549e-05	0.000400553	4.1655e-06	305.532	0.0561088	49.7857	0.0229856	0.888141	0.00581769	71.5153	0.0200922	0.187257	0.00126879	305.648	0.051159	49.7091	0.0176192	0.99545	0.00571403	71.6349	0.0188695	0.190124	0.00125583	0.567641	0.0230425	0.0289884	0.00239744	0.00413504	0.00109333	0.0053733	0.00690201	0.00278084	0.000139983
	01E	ok	3.5	38.0246	0.0616798	0.109093	0.00111595	19.3827	0.895713	60.1004	88.4805	5.52971	0.00906324	0.0896333	2.13e-16	0.160013	0.000100973	0.00038977	4.46987e-06	232.569	0.0479712	37.3294	0.0219028	0.622382	0.00578926	52.652	0.02105	0.138416	0.00103683	232.642	0.0427038	37.2756	0.0190322	0.727009	0.00568509	52.7725	0.0198863	0.141281	0.00102466	0.567942	0.0218547	0.0289884	0.00239744	0.00413504	0.00109333	0.0053733	0.00690201	0.00279998	0.000134484
	01F	ok	4	36.674	0.0683632	0.10543	0.00107864	20.6279	1.0952	70.7398	89.9156	5.33132	0.0100379	0.0783976	2.13e-16	0.168659	0.000112792	0.000341201	5.31073e-06	192.987	0.0507864	32.6541	0.0197473	0.535932	0.00548813	47.644	0.0195532	0.109078	0.00102262	193.076	0.046299	32.6133	0.0174035	0.644644	0.00537812	47.7537	0.0182945	0.111948	0.00101225	0.568244	0.0208726	0.0289884	0.00239744	0.00413504	0.00109333	0.0053733	0.00690201	0.00281915	0.000130647
	01G	ok	4.5	36.3913	0.147833	0.109677	0.00112754	16.4503	1.41043	76.3534	70.4002	5.28981	0.0217032	0.0413637	2.13e-16	0.133089	0.000137783	0.00100164	9.2778e-06	129.036	0.0421936	17.2263	0.0167841	0.314076	0.00592788	24.1602	0.0186815	0.151174	0.00119584	129.132	0.0370839	17.1934	0.0158989	0.416346	0.00582618	24.2721	0.0173598	0.154078	0.00118543	0.568546	0.0201268	0.0289884	0.00239744	0.00413504	0.00109333	0.0053733	0.00690201	0.00283837	0.000128627
	01H	ok	5	35.4511	0.11542	0.10308	0.00107127	21.3289	3.57511	79.8906	91.2039	5.15182	0.016936	0.0260643	2.13e-16	0.177037	0.000297037	0.000297596	8.66766e-06	61.1252	0.0387839	10.8572	0.0167652	0.176525	0.00565373	16.1957	0.0195605	0.0328906	0.000528933	61.2085	0.0334297	10.8518	0.0162779	0.285709	0.005547	16.2925	0.0183024	0.0357665	0.000512881	0.568835	0.0196633	0.0289884	0.00239744	0.00413504	0.00109333	0.0053733	0.00690201	0.00285671	0.000128486
	01I	ok	5.5	35.304	0.246266	0.102553	0.00114975	18.3297	6.46171	81.2506	89.1185	5.13024	0.0361327	0.0100215	2.13e-16	0.173716	0.000708615	0.000368174	1.71382e-05	23.9514	0.0383072	4.17459	0.0156002	0.0703596	0.00532673	6.25812	0.0170583	0.0144995	0.000409847	24.0325	0.0329962	4.187	0.0153198	0.176042	0.00521332	6.36036	0.0155996	0.017386	0.000388721	0.569122	0.0194601	0.0289884	0.00239744	0.00413504	0.00109333	0.0053733	0.00690201	0.002875	0.000130089
	01J	ok	6	35.5051	0.17923	0.10119	0.00106588	21.3054	5.71621	83.5523	84.0468	5.15974	0.0262998	0.0169604	2.13e-16	0.162893	0.000359098	0.00053981	1.29453e-05	43.2285	0.0384797	7.06543	0.0141766	0.117153	0.00590293	10.7323	0.0177749	0.0330791	0.000558782	43.314	0.0331589	7.08388	0.0137826	0.223772	0.00580079	10.8363	0.0163801	0.0359916	0.000542455	0.56941	0.0195236	0.0289884	0.00239744	0.00413504	0.00109333	0.0053733	0.00690201	0.00289329	0.000133372
	01K	ok	6.5	36.7834	0.0941692	0.100245	0.00103278	26.8854	4.2145	88.4378	93.2776	5.34739	0.0138279	0.0359989	2.13e-16	0.17444	0.000218931	0.000227422	7.10527e-06	85.6801	0.0389997	14.9971	0.017405	0.23343	0.00578917	22.9904	0.0184852	0.0403616	0.000607698	85.7717	0.033569	14.9855	0.0166185	0.34645	0.005685	23.0923	0.0171484	0.0432954	0.000591461	0.569698	0.0198519	0.0289884	0.00239744	0.00413504	0.00109333	0.0053733	0.00690201	0.0029116	0.000138221
	01L	ok	7	36.213	0.155799	0.104119	0.00109288	24.1598	5.85406	91.0781	90.9343	5.26364	0.0228705	0.019455	2.13e-16	0.172763	0.000373956	0.000306723	1.15236e-05	46.7537	0.0393495	8.10376	0.0160805	0.128883	0.00538958	11.9607	0.017169	0.025203	0.000538156	46.8622	0.0336277	8.09178	0.0156517	0.238799	0.00527752	12.0701	0.0157206	0.028149	0.000518373	0.569987	0.0204344	0.0289884	0.00239744	0.00413504	0.00109333	0.0053733	0.00690201	0.00292997	0.000144497
	01M	ok	10	35.6522	0.0835225	0.101535	0.00104277	15.6124	1.03929	97.5495	90.3749	5.18133	0.0122569	0.0476856	2.13e-16	0.174428	0.000180655	0.000325654	6.45955e-06	113.503	0.0424165	19.8648	0.0190087	0.346546	0.00557377	30.058	0.0193906	0.0642684	0.000731725	113.633	0.0367114	19.8282	0.0176862	0.455424	0.00546549	30.1506	0.0181207	0.0672488	0.000714885	0.570275	0.021247	0.0289884	0.00239744	0.00413504	0.00109333	0.0053733	0.00690201	0.00294828	0.000151989
	01N	ok	15	35.0966	0.142726	0.0922554	0.000970961	11.3477	1.42427	100	93.5392	5.09981	0.0209387	0.0180565	2.13e-16	0.183421	0.000436251	0.000218563	1.05314e-05	40.8715	0.0375448	7.52481	0.0164174	0.142909	0.00550907	12.5244	0.0168879	0.0203135	0.000429744	40.9642	0.0302311	7.51148	0.0159813	0.25398	0.00539949	12.6365	0.0154131	0.0232912	0.000398615	0.570562	0.0222641	0.0289884	0.00239744	0.00413504	0.00109333	0.0053733	0.00690201	0.00296657	0.000160528
Integrated K/Ca ±2σ						0.106486	0.00217403	SD
Total integrated Age ±2σ				37.3546	0.0608042	n=14/14	MSWD = *150.48
Isochron Age ±2σ				36.8256	0.0662137		MSWD = *136.75							K2O wt. %=0.74
(40Ar/36Ar)trapped ±2σ				313.678	2.06231
	Sample:	18L-07			Identifier:	66902
	Material:	Biotite
	Weight:	3.41 mg
pX	01A	ok	0.5	27.2564	0.832348	2.32315	0.359933	-10.4001	9.23537	0.3944	18.6687	10.0412	0.308925	0.0343554	4e-16	0.018592	0.000271087	0.00275233	1.64309e-05	61.1357	0.0367499	1.13652	0.0165547	0.0380827	0.00646611	0.122665	0.0188617	0.168332	0.000999343	61.3531	0.0299384	1.1011	0.0123251	0.114046	0.00512057	0.118784	0.0150272	0.172022	0.00100196	0.259266	0.021313	-0.00595938	0.0110284	0.00193079	0.00394847	-0.0185965	0.0113994	0.00147889	0.000108529
pX	01B	ok	0.8	33.6204	0.135841	9.00131	1.18106	67.3268	88.273	2.06672	91.1737	12.4073	0.050593	0.145672	4e-16	0.0734845	0.000267416	0.00029866	5.59874e-06	65.586	0.0376966	4.81847	0.0173138	0.0668134	0.00624762	0.134515	0.0175362	0.0196619	0.000366892	65.8021	0.0317389	4.76915	0.0136584	0.136207	0.00498118	0.137692	0.0137355	0.0213625	0.000356937	0.254329	0.0203391	-0.00650822	0.0105407	0.00138794	0.00377102	-0.0158165	0.010902	0.00144244	0.000103133
pX	01C	ok	1	33.3595	0.110216	12.542	2.0531	26.2772	10.9744	3.98477	96.3669	12.3102	0.0410431	0.167078	4e-16	0.0782831	0.000243946	0.000122915	3.83277e-06	70.6126	0.0357451	5.52647	0.0169921	0.0825791	0.00584417	0.11084	0.0180296	0.00874086	0.000270418	70.7996	0.0299613	5.47511	0.0135496	0.148198	0.00458915	0.131848	0.0146695	0.0102615	0.000255702	0.24937	0.0194944	-0.00705948	0.0101256	0.000842695	0.00361857	-0.0130243	0.010482	0.00140582	9.82373e-05
pX	01D	ok	1.5	33.383	0.0298529	14.8711	0.581122	72.0974	17.9327	13.4655	96.6158	12.3189	0.011117	0.825846	4e-16	0.0784296	5.99218e-05	0.000114492	1.55222e-06	348.377	0.054727	27.3165	0.020423	0.363526	0.00612424	0.462346	0.0173459	0.0401408	0.000540626	348.592	0.0513953	27.295	0.0163752	0.436823	0.0050286	0.478313	0.0140645	0.0420373	0.000539112	0.244426	0.0188033	-0.00760913	0.00979575	0.000299045	0.00349564	-0.0102402	0.0101524	0.00136931	9.39614e-05
	01E	ok	1.7	33.2709	0.0262856	15.2801	0.513029	72.7106	16.4387	24.5001	96.9974	12.2772	0.00978799	0.961202	4e-16	0.0790072	5.37382e-05	0.000101578	1.34844e-06	402.512	0.061797	31.7937	0.0210652	0.421815	0.00638703	0.523709	0.0166564	0.0411745	0.000542635	402.745	0.0590321	31.765	0.0167572	0.495251	0.00540406	0.525992	0.0133804	0.0430479	0.000541767	0.239452	0.0182777	-0.008162	0.00955738	-0.000247789	0.00340446	-0.00743981	0.00991961	0.00133258	9.03572e-05
	01F	ok	1.9	33.199	0.02514	17.4471	0.689273	63.5843	11.8912	35.6171	97.7886	12.2504	0.00936104	0.968382	4e-16	0.0798258	5.43529e-05	7.48001e-05	1.1359e-06	401.36	0.0592815	32.031	0.0212888	0.427062	0.00606265	0.462348	0.0175346	0.0302767	0.00045577	401.585	0.0565026	31.9996	0.017082	0.494931	0.00505401	0.479614	0.014545	0.0319702	0.000453047	0.234486	0.0179375	-0.00871406	0.00941993	-0.000793827	0.00334855	-0.00464351	0.00979312	0.00129591	8.75413e-05
	01G	ok	2	33.2715	0.0361355	16.9973	1.09525	47.9126	10.9299	42.2038	97.9675	12.2774	0.0134558	0.573758	4e-16	0.0797958	8.04698e-05	6.87473e-05	1.41094e-06	237.892	0.0494144	18.9781	0.0187271	0.259275	0.00594153	0.2811	0.0177791	0.0165098	0.000335483	238.097	0.0461	18.9416	0.0153862	0.322002	0.00492098	0.302391	0.0148498	0.017986	0.000328799	0.229527	0.0177925	-0.00926532	0.00938736	-0.00133907	0.00332953	-0.00185129	0.00977653	0.0012593	8.55876e-05
	01H	ok	2.1	33.1827	0.0716252	11.2522	1.06502	29.4933	9.78619	45.0112	98.0594	12.2443	0.0266698	0.244542	4e-16	0.0800864	0.000163989	6.56383e-05	2.44933e-06	101.024	0.0366031	8.08878	0.0163009	0.117495	0.00604857	0.180606	0.0169264	0.00673123	0.000247248	101.208	0.0319578	8.04057	0.0130834	0.179011	0.00503759	0.190471	0.013751	0.00804242	0.000235762	0.224582	0.0178462	-0.00981497	0.00946011	-0.00188272	0.00334781	0.000932778	0.00986969	0.00122279	8.45523e-05
	01I	ok	2.5	33.1834	0.0259264	18.6605	0.882588	74.4278	16.174	55.5908	97.4233	12.2446	0.00965375	0.921568	4e-16	0.0795653	5.40251e-05	8.71634e-05	1.30754e-06	383.208	0.0583021	30.4826	0.0201699	0.402656	0.00572554	0.411358	0.0188728	0.0336283	0.000500916	383.408	0.0554224	30.4613	0.0157525	0.469727	0.00460465	0.445048	0.0159619	0.0352561	0.000500043	0.219631	0.0180968	-0.0103654	0.0096359	-0.00242717	0.00340279	0.00372092	0.0100697	0.00118622	8.44627e-05
	01J	ok	3	33.2335	0.0214432	19.2457	0.660594	71.8478	11.6971	69.5996	97.3191	12.2632	0.00798464	1.22028	4e-16	0.0793592	4.44417e-05	9.06906e-05	1.07857e-06	508.736	0.064509	40.363	0.0220143	0.534821	0.00574072	0.528151	0.0171855	0.0464286	0.000548582	508.927	0.0617883	40.3518	0.016474	0.603443	0.00455583	0.551364	0.0137035	0.048188	0.000548548	0.214672	0.018537	-0.0109167	0.00990967	-0.00297241	0.00349289	0.00651314	0.0103709	0.0011496	8.53257e-05
	01K	ok	3.5	33.2316	0.0214749	31.121	1.77847	238.603	133.099	83.5223	98.103	12.2626	0.00799647	1.21278	4e-16	0.0800029	4.63638e-05	6.41628e-05	9.83025e-07	501.542	0.0637461	40.1146	0.0226795	0.502874	0.00591502	0.325834	0.0181223	0.0323584	0.000492899	501.725	0.0608012	40.1033	0.0171799	0.567833	0.00468177	0.35845	0.0145798	0.0338965	0.000491364	0.209727	0.0191516	-0.0114663	0.0102722	-0.00351606	0.00361504	0.00929721	0.0107633	0.00111309	8.71075e-05
pX	01L	ok	5	33.1261	0.0317396	22.3492	1.73146	50.9745	11.9927	90.917	97.9764	12.2233	0.0118179	0.644138	4e-16	0.0801564	6.89227e-05	6.84469e-05	1.45592e-06	265.871	0.0479377	21.306	0.0179117	0.289239	0.00646239	0.240248	0.0183101	0.018331	0.000386934	266.033	0.0436	21.2611	0.0131758	0.346519	0.00525125	0.312759	0.0144552	0.0196483	0.000381455	0.204776	0.0199265	-0.0120168	0.0107159	-0.0040605	0.00376655	0.0120854	0.0112387	0.00107653	8.97588e-05
pX	01M	ok	6	32.9765	0.0663648	24.6991	4.56321	45.7842	19.4183	94.4091	97.4925	12.1676	0.0247083	0.304189	4e-16	0.0801257	0.000151942	8.48236e-05	2.3778e-06	125.604	0.043317	10.0616	0.0187609	0.138466	0.00618853	0.102725	0.0187931	0.0107111	0.000298452	125.768	0.0379718	10.0054	0.0147677	0.206429	0.0047688	0.145109	0.0146368	0.0118917	0.00028758	0.199817	0.0208448	-0.0125681	0.0112314	-0.00460575	0.00394417	0.0148776	0.0117875	0.00103991	9.32093e-05
pX	01N	ok	7	32.8551	0.143783	32.8384	20.204	19.4447	8.80897	95.8274	97.6346	12.1224	0.0535284	0.123542	4e-16	0.0805417	0.000341511	8.00124e-05	4.03726e-06	50.7487	0.0348012	4.08634	0.0170983	0.0642438	0.0063388	0.0314589	0.0191423	0.00407849	0.00020459	50.8847	0.0270567	4.01914	0.0122957	0.123768	0.0047963	0.0779638	0.0145836	0.00513535	0.000182967	0.194858	0.0218873	-0.0131193	0.0118089	-0.00515099	0.00414438	0.0176698	0.0123995	0.00100329	9.73711e-05
pX	01O	ok	10	32.9827	0.0910185	28.8409	8.42058	25.4455	8.38934	98.4202	97.9496	12.1699	0.0338873	0.225852	4e-16	0.0804862	0.000214763	6.93522e-05	2.61865e-06	92.8397	0.0399896	7.47042	0.0196715	0.111223	0.00643564	0.0653862	0.018896	0.00647549	0.00024287	92.9705	0.0326896	7.41656	0.0150874	0.16932	0.00473056	0.0972602	0.0136528	0.00752731	0.000223826	0.189913	0.0230338	-0.013669	0.0124378	-0.00569464	0.0043634	0.0204539	0.0130637	0.000966784	0.000102143
pX	01P	ok	15	33.1412	0.14443	675.13	7967.34	43.5138	41.7733	100	97.881	12.2289	0.0537778	0.137617	4e-16	0.0800417	0.000338838	7.16757e-05	3.91458e-06	56.8835	0.0377764	4.55185	0.0190303	0.0628325	0.00668728	0.00206468	0.019891	0.00407848	0.000222383	57.0181	0.0289437	4.50035	0.0137124	0.127228	0.00485409	0.0560743	0.0143482	0.00506221	0.000198007	0.184954	0.0242758	-0.0142202	0.0131141	-0.00623988	0.00459973	0.0232461	0.0137761	0.000930166	0.000107468
Integrated K/Ca ±2σ						18.739	0.751956	SD
Plateau Age ±2σ				33.2274	0.0245801	n=7/16	MSWD = 1.48	steps E-K
Total Integrated Age ±2σ				33.1986	0.0206622									K2O wt. %=8.71
Isochron Age ±2σ				33.2627	0.0560732		MSWD = *7.22
(40Ar/36Ar)trapped ±2σ				283.271	4.18968
	Sample:	19L-5			Identifier:	67492
	Material:	Biotite
	Weight:	2.64 mg
pX	01A	ok	0.5	26.2407	0.513425	3.97463	0.174082	3893.15	3226.89	1.24715	18.6753	3.85879	0.0760434	0.073447	2.13e-16	0.0483979	0.000104664	0.00275209	1.1457e-05	182.792	0.0537136	8.84561	0.0189499	0.211453	0.00827219	0.583157	0.0255088	0.503302	0.00208892	184.058	0.046441	8.74764	0.0153787	0.28247	0.00555388	0.558327	0.0163267	0.496488	0.00199361	1.35599	0.0269887	0.0295414	0.0107835	0.00558506	0.00613055	0.0259262	0.0195994	0.00581799	0.000215734
pX	01B	ok	1	33.1116	0.163114	3.56553	0.0876299	7766.15	8129.92	3.23991	62.5746	4.87834	0.0242497	0.117357	2.13e-16	0.128279	0.000185573	0.00126636	9.79601e-06	110.2	0.0445219	14.1341	0.0196284	0.205271	0.00835774	1.03854	0.0254811	0.139997	0.00107788	111.448	0.036441	13.998	0.016154	0.274605	0.00568051	0.99439	0.0162834	0.142269	0.00102595	1.34842	0.0255784	0.0295414	0.0107835	0.00558506	0.00613055	0.0259262	0.0195994	0.00578665	0.000204653
pX	01C	ok	1.5	33.7327	0.0666355	6.11745	0.122841	3707.21	861.151	7.48111	85.0424	4.97071	0.00990987	0.249771	2.13e-16	0.171103	0.00013129	0.000505912	5.20443e-06	175.842	0.0490935	30.0805	0.0214837	0.416501	0.00816	1.28807	0.0258474	0.0895157	0.000914619	177.105	0.0426431	29.8485	0.0181203	0.480087	0.00538534	1.22212	0.0168509	0.0930255	0.000867785	1.34125	0.0243258	0.0295414	0.0107835	0.00558506	0.00613055	0.0259262	0.0195994	0.00575696	0.000194962
pX	01D	ok	1.9	33.661	0.0382173	5.6869	0.060042	3973.81	601.892	14.775	91.5657	4.96004	0.00568335	0.429552	2.13e-16	0.184625	9.35704e-05	0.000285117	3.13524e-06	280.263	0.0589215	51.732	0.0238145	0.69846	0.00828569	2.38254	0.0251295	0.0809416	0.000878227	281.513	0.0541756	51.3675	0.0203203	0.768969	0.00557395	2.29462	0.0157275	0.084637	0.000833737	1.33408	0.0231678	0.0295414	0.0107835	0.00558506	0.00613055	0.0259262	0.0195994	0.00572728	0.000186181
	01E	ok	2	33.3646	0.0377011	5.1573	0.0658258	3352.29	523.447	20.41	94.0105	4.91596	0.00560569	0.331854	2.13e-16	0.191255	0.000122011	0.000202363	2.97469e-06	209.015	0.0507637	39.9662	0.0235477	0.544176	0.00794737	2.02935	0.0258727	0.04318	0.000621352	210.263	0.045692	39.6738	0.020305	0.61321	0.00505738	1.96261	0.0168897	0.0477962	0.000578075	1.3269	0.0221178	0.0295414	0.0107835	0.00558506	0.00613055	0.0259262	0.0195994	0.00569755	0.000178433
	01F	ok	2.1	33.3505	0.043427	4.70043	0.0649995	3574.51	732.522	25.09	94.2824	4.91387	0.00645701	0.275615	2.13e-16	0.19189	0.000133133	0.000193158	3.53352e-06	173.019	0.0456941	33.1933	0.0212731	0.448927	0.00821252	1.84897	0.0255392	0.034225	0.00061101	174.26	0.0404811	32.9432	0.0178134	0.512918	0.0054646	1.77728	0.0163742	0.0390364	0.000569822	1.31973	0.0211951	0.0295414	0.0107835	0.00558506	0.00613055	0.0259262	0.0195994	0.00566786	0.000171882
	01G	ok	2.5	33.4056	0.0249561	3.99206	0.0182883	2868.79	202.709	37.3876	93.9275	4.92207	0.00371075	0.724221	2.13e-16	0.190849	6.42936e-05	0.000205171	2.10854e-06	457.114	0.0684794	87.2217	0.026209	1.20722	0.00839055	5.71963	0.0261441	0.0962785	0.000962825	458.363	0.065376	86.6494	0.0218368	1.26899	0.00572867	5.63643	0.0173026	0.0995037	0.000921276	1.31221	0.0203814	0.0295414	0.0107835	0.00558506	0.00613055	0.0259262	0.0195994	0.00563674	0.000166439
	01H	ok	3	33.4024	0.0240388	5.81315	0.041431	3344.87	292.152	48.5131	94.8411	4.92159	0.00357434	0.655201	2.13e-16	0.192724	7.30816e-05	0.000174248	1.95758e-06	409.526	0.0701502	78.9074	0.0266049	1.07234	0.00816645	3.55295	0.0252926	0.072907	0.000801078	410.771	0.0673077	78.3815	0.0226401	1.13864	0.00539512	3.47736	0.0159869	0.0766864	0.000762091	1.30501	0.0197669	0.0295414	0.0107835	0.00558506	0.00613055	0.0259262	0.0195994	0.00560692	0.000162726
	01I	ok	3.25	33.3233	0.0255299	5.99125	0.0566983	3321.24	366.943	57.2564	95.1973	4.90982	0.0037959	0.514911	2.13e-16	0.193912	8.52419e-05	0.00016219	2.02098e-06	319.868	0.0610895	62.0118	0.0244904	0.842523	0.00853604	2.70877	0.0256109	0.05306	0.000645953	321.061	0.0579514	61.5829	0.0207908	0.908113	0.00593973	2.64376	0.0164857	0.0573103	0.000607767	1.29776	0.0193277	0.0295414	0.0107835	0.00558506	0.00613055	0.0259262	0.0195994	0.00557693	0.000160578
	01J	ok	3.5	33.3934	0.028257	6.51287	0.0672004	3397.61	371.773	66.1305	95.3696	4.92025	0.00420153	0.522607	2.13e-16	0.193851	9.04568e-05	0.000156361	2.28315e-06	324.751	0.0682983	62.9384	0.0261565	0.85288	0.00834898	2.52867	0.0260687	0.0518804	0.000741019	325.965	0.0655785	62.509	0.0226736	0.919918	0.00566761	2.42823	0.0171883	0.0561307	0.000703504	1.29059	0.0190818	0.0295414	0.0107835	0.00558506	0.00613055	0.0259262	0.0195994	0.00554724	0.000160082
	01K	ok	4	33.4044	0.0255812	7.63012	0.0857806	3595.28	395.509	75.5161	94.7883	4.92189	0.00380369	0.552737	2.13e-16	0.192605	8.08214e-05	0.000176036	2.05131e-06	345.696	0.0623531	66.5666	0.0251524	0.898633	0.00832578	2.28249	0.025645	0.0618485	0.000708715	346.912	0.0593778	66.1183	0.0214057	0.964254	0.00563338	2.17522	0.0165388	0.065824	0.000670428	1.28339	0.0190312	0.0295414	0.0107835	0.00558506	0.00613055	0.0259262	0.0195994	0.00551742	0.000161231
pX	01L	ok	5	33.4551	0.0231681	4.57508	0.0270161	3681.71	381.648	85.9939	95.6029	4.92943	0.00344498	0.617053	2.13e-16	0.193964	7.37273e-05	0.000148462	1.87457e-06	383.218	0.0588405	74.3142	0.0257561	0.999043	0.00842817	4.24891	0.0250452	0.0587467	0.000717603	384.426	0.0556273	73.7993	0.0218293	1.07081	0.00578363	4.15559	0.0155925	0.0627677	0.000678831	1.27621	0.0191784	0.0295414	0.0107835	0.00558506	0.00613055	0.0259262	0.0195994	0.00548769	0.000163987
pX	01M	ok	6	33.3895	0.0307259	9.87078	0.210921	3213.74	442.506	92.3831	96.3119	4.91966	0.00456863	0.376274	2.13e-16	0.19579	0.000108345	0.000124463	2.41163e-06	231.503	0.0563039	45.3146	0.0224863	0.615957	0.0082422	1.20071	0.0256493	0.0293377	0.000558024	232.707	0.0528128	45.0008	0.0189519	0.677659	0.00550911	1.13499	0.0165454	0.0340592	0.000516925	1.26904	0.0195177	0.0295414	0.0107835	0.00558506	0.00613055	0.0259262	0.0195994	0.00545801	0.000168264
pX	01N	ok	7	33.3913	0.0481656	7.44031	0.220741	3269.9	793.138	95.974	95.5399	4.91994	0.00716174	0.211475	2.13e-16	0.19421	0.000167561	0.000150597	3.76503e-06	131.169	0.0477847	25.4681	0.0199032	0.346258	0.00822064	0.895129	0.0265466	0.0201441	0.000493576	132.286	0.0433796	25.2533	0.0163319	0.405076	0.0054768	0.82902	0.0179049	0.0250667	0.000448418	1.26186	0.0200396	0.0295414	0.0107835	0.00558506	0.00613055	0.0259262	0.0195994	0.00542832	0.000173952
pX	01O	ok	12	33.5156	0.0503461	7.14367	0.171109	2812.54	526.777	100	93.3598	4.93841	0.00748646	0.237096	2.13e-16	0.189068	0.000153023	0.000224389	4.01312e-06	151.06	0.0496303	28.5538	0.0211034	0.39667	0.00824925	1.04509	0.0250196	0.0343514	0.000605915	152.248	0.045093	28.3252	0.0177024	0.452434	0.00551964	0.938405	0.0155513	0.0388903	0.00056179	1.25468	0.0207312	0.0295414	0.0107835	0.00558506	0.00613055	0.0259262	0.0195994	0.00539859	0.00018093
Integrated K/Ca ±2σ						5.45517	0.0359864	SD
Plateau Age ±2σ				33.3823	0.0253765	n=7/15	MSWD = 1.43	steps E-K
Total Integrated Age ±2σ				33.3375	0.0224786									K2O wt. %=5.89
Isochron Age ±2σ				33.4976	0.0682745		MSWD = *15.00
(40Ar/36Ar)trapped ±2σ				283.077	2.13183
	Sample:	18L-8			Identifier:	67293
	Material:	Hornblende
	Weight:	8.18 mg
pX	01A	ok	1.5	34.7941	0.980981	0.144113	0.0015176	9.07526	1.29003	3.41718	8.71108	5.09868	0.145122	0.0489561	4e-16	0.017085	3.59084e-05	0.0030893	6.53039e-06	572.797	0.0925858	9.80779	0.0205031	0.527649	0.0101739	19.8442	0.0305371	1.77909	0.0037292	574.261	0.0866006	9.76147	0.013085	0.608395	0.00496248	19.9252	0.0160693	1.74985	0.0034569	1.6685	0.0285812	0.0393338	0.0134098	-0.00793594	0.00699016	0.00365211	0.0197013	0.007693	0.000236803
pX	01B	ok	2	35.3841	0.0829132	0.113876	0.00116623	15.523	1.1233	14.3114	77.3714	5.18597	0.0122698	0.156075	4e-16	0.149197	0.000120683	0.000765722	5.65699e-06	209.118	0.0478697	31.2878	0.0241962	0.563285	0.00962291	80.0488	0.0316515	0.198668	0.00116354	210.529	0.0372086	31.1638	0.0164127	0.655187	0.00519347	80.1719	0.0195674	0.20218	0.00110997	1.65688	0.0268938	0.0382703	0.0126257	-0.00668349	0.00657322	0.00312226	0.018544	0.00763182	0.000222596
	01C	ok	2.5	34.9622	0.0541445	0.111436	0.00113937	15.1567	0.737837	30.0458	89.9258	5.12354	0.00801064	0.225419	4e-16	0.175519	0.000109199	0.000340851	4.31647e-06	256.735	0.0532395	45.1919	0.0264171	0.791962	0.0095004	118.126	0.0314614	0.144395	0.0010638	258.157	0.0445782	44.9967	0.0171927	0.890393	0.00505087	118.232	0.0219874	0.148992	0.00101609	1.64528	0.025373	0.0372082	0.011926	-0.00543273	0.00619356	0.00259312	0.0175061	0.00757072	0.000209585
	01D	ok	3	34.9457	0.0530556	0.110591	0.00113138	14.3243	0.745565	42.8542	94.0969	5.12111	0.00784945	0.183499	4e-16	0.183747	0.000129871	0.000199693	4.30973e-06	199.632	0.0464727	36.7886	0.0244672	0.648379	0.00876912	96.8776	0.0292553	0.0865278	0.000821858	201.039	0.03723	36.6416	0.0169485	0.741242	0.00466687	96.9681	0.0194079	0.0922461	0.00077791	1.63421	0.0241039	0.0361951	0.0113503	-0.0042396	0.00587211	0.00208837	0.0166461	0.00751244	0.000198482
	01E	ok	3.5	35.0444	0.051702	0.108393	0.00110932	15.501	0.953756	54.5558	95.1746	5.1357	0.00764961	0.167642	4e-16	0.185324	0.000139368	0.000163218	4.12374e-06	180.83	0.0453939	33.6117	0.0237447	0.579718	0.00877886	90.2735	0.0305284	0.0730091	0.000706945	182.212	0.0374257	33.4683	0.0161396	0.679456	0.00495673	90.3497	0.0206121	0.078906	0.00066626	1.61327	0.0222935	0.0342782	0.0105569	-0.00198213	0.00539764	0.00113335	0.0154406	0.00740217	0.000181791
	01F	ok	4	34.919	0.0576995	0.108794	0.00111419	16.3341	1.28091	64.518	97.5481	5.11716	0.00853639	0.142723	4e-16	0.190634	0.000160954	8.28948e-05	4.74256e-06	149.663	0.0433172	28.6153	0.0226189	0.484823	0.0090711	76.5592	0.0277916	0.0492991	0.000680654	151.025	0.035081	28.483	0.0157766	0.581	0.00512549	76.6548	0.0178617	0.0556211	0.000642168	1.60203	0.0216956	0.0332492	0.0103162	-0.000770353	0.00522866	0.000620703	0.0150586	0.00734298	0.000175618
	01G	ok	4.5	35.0057	0.0579687	0.110596	0.00113275	15.3003	1.15036	74.1561	96.1543	5.12997	0.00857663	0.138081	4e-16	0.187441	0.000158975	0.000130062	4.67525e-06	147.261	0.0430417	27.6831	0.021967	0.477669	0.00898064	72.8499	0.0276968	0.0542645	0.000661277	148.632	0.0343727	27.576	0.0153354	0.579644	0.00508745	72.9588	0.0174529	0.0604222	0.000623372	1.59092	0.0213915	0.0322318	0.0102183	0.000427866	0.00512849	0.000113797	0.014883	0.00728445	0.000171714
	01H	ok	5	35.0225	0.0582584	0.107449	0.00110035	16.7962	1.39356	83.9193	95.4937	5.13246	0.00861956	0.139872	4e-16	0.186063	0.000156267	0.00015242	4.68305e-06	150.276	0.0455479	28.0447	0.0218909	0.474277	0.00915214	75.9439	0.0277988	0.0595129	0.000674794	151.636	0.0372151	27.9201	0.0154086	0.581245	0.00498571	76.0639	0.0185454	0.0655033	0.000637334	1.57985	0.0213847	0.0312186	0.0102632	0.001621	0.0050988	-0.000390959	0.0149149	0.00722617	0.000170148
	01I	ok	5.5	35.0585	0.106218	0.102782	0.00106779	15.8311	2.80611	87.8404	97.5356	5.13779	0.0157157	0.0561746	4e-16	0.189844	0.000361362	8.33183e-05	7.88621e-06	59.151	0.0396714	11.2648	0.0199983	0.192779	0.00836585	31.8799	0.0252654	0.0202983	0.000458733	60.4915	0.0305918	11.217	0.0144438	0.290723	0.00445516	31.9891	0.0156064	0.0270503	0.000415181	1.56883	0.0216715	0.0302098	0.0104473	0.00280905	0.00513988	-0.000893564	0.0151503	0.00716813	0.000170954
	01J	ok	6	34.8702	0.0947111	0.105641	0.00109033	14.2558	1.87222	92.8217	93.8578	5.10993	0.0140117	0.0713645	4e-16	0.183682	0.000271636	0.000207781	7.29901e-06	77.6668	0.0422076	14.3095	0.0196148	0.253093	0.00873829	39.3981	0.0280516	0.0351355	0.000557139	78.9818	0.0319538	14.2346	0.0140777	0.348983	0.00516897	39.495	0.0160378	0.0415208	0.000516519	1.5577	0.022247	0.0291909	0.0107671	0.00400897	0.00525126	-0.00140119	0.015585	0.00710952	0.000174132
	01K	ok	6.5	34.9796	0.218865	0.10432	0.00115802	11.8615	3.46262	94.5157	97.094	5.12612	0.0323811	0.0242698	4e-16	0.189415	0.000793672	9.82606e-05	1.54842e-05	25.6137	0.0382515	4.86663	0.0189889	0.0901419	0.00794966	13.566	0.0262632	0.0090597	0.000394773	26.948	0.0270533	4.82693	0.0133814	0.193094	0.0044171	13.6516	0.0153367	0.0159231	0.000342327	1.54669	0.0230789	0.0281821	0.0112051	0.00519702	0.00542649	-0.00190379	0.0161949	0.00705149	0.000179495
	01L	ok	7	35.136	0.357245	0.10874	0.00138737	68.0335	228.06	95.5145	97.9583	5.14925	0.0528591	0.0143088	4e-16	0.190243	0.00138359	6.90125e-05	2.39479e-05	15.0354	0.0396245	2.86884	0.019384	0.0396972	0.00939163	7.67184	0.0272649	0.00473774	0.00035924	16.3362	0.0279372	2.83744	0.0137711	0.149454	0.00489888	7.75653	0.0148379	0.0116354	0.000298005	1.53565	0.0241462	0.0271718	0.0117511	0.00638676	0.00566071	-0.00240711	0.0169651	0.00699337	0.000186884
	01M	ok	10	34.8196	0.118459	0.101149	0.00105472	13.9205	2.38714	99.2351	95.1508	5.10245	0.0175246	0.0533032	4e-16	0.186485	0.000387606	0.000164023	8.76814e-06	57.1384	0.0413242	10.6896	0.0207573	0.190102	0.00873368	30.7189	0.0275349	0.0241919	0.000494227	58.4647	0.0289055	10.6246	0.014983	0.296631	0.00485325	30.7925	0.0174198	0.0306299	0.000442157	1.52457	0.0254242	0.0261573	0.0123932	0.00758159	0.0059481	-0.00291259	0.0178785	0.00693501	0.000196109
	01N	ok	15	35.4549	0.473518	0.120777	0.00177637	18.4171	24.487	100	89.3437	5.19645	0.0700755	0.0109582	4e-16	0.171936	0.00166081	0.000360553	2.80451e-05	12.7406	0.0408542	2.19636	0.0199548	0.0367331	0.0105375	5.28814	0.02848	0.00714512	0.00035646	14.0129	0.0274551	2.17343	0.0131474	0.142714	0.00520833	5.39109	0.0152804	0.013876	0.000281068	1.51347	0.0268816	0.0251413	0.0131167	0.00877812	0.0062811	-0.00341878	0.0189134	0.00687656	0.000206915
Integrated K/Ca ±2σ						0.108688	0.00221936	SD
Plateau Age ±2σ				34.9775	0.0419998	n=12/14	MSWD = 0.80	steps C-N
Total Integrated Age ±2σ				35.0154	0.0788814									K2O wt. %=1.43
Isochron Age ±2σ				34.9986	0.0483907		MSWD = *2.66
(40Ar/36Ar)trapped ±2σ				295.972	1.23518
	Sample:	18L-15			Identifier:	67803
	Material:	GroundmassConcentrate
	Weight:	8.45 mg
pX	01A	ok	0.8	28.6585	0.437238	1.44155	0.0169381	14.5155	0.752228	6.61321	13.1542	4.17601	0.0642128	0.095721	2.13e-16	0.0314996	2.31608e-05	0.00293894	4.69025e-06	1183.07	0.0997563	37.2606	0.0272071	1.27578	0.00869048	4.15476	0.0239951	3.48058	0.00554095	1182.91	0.0964064	37.1772	0.0180098	1.38006	0.00567573	4.24621	0.0163614	3.47641	0.00530302	0.272203	0.0256344	0.0277187	0.0143462	0.00181511	0.00658107	0.0113994	0.0175518	0.0020371	0.000157817
pX	01B	ok	1.3	32.9931	0.119789	0.87748	0.00919822	30.7844	2.10042	17.1006	45.1384	4.81334	0.017634	0.151797	2.13e-16	0.0937789	5.42159e-05	0.00185655	4.5396e-06	630.184	0.0656241	59.0989	0.0335825	1.06688	0.00857928	10.8205	0.0252108	1.1794	0.00285797	629.998	0.0613336	58.9416	0.0209597	1.16578	0.00550396	10.927	0.0180975	1.17931	0.00279952	0.263609	0.0233389	0.0277187	0.0143462	0.00181511	0.00658107	0.0113994	0.0175518	0.00201125	0.0001438
	01C	ok	1.6	33.3569	0.0880928	0.898624	0.00940423	62.8059	8.83338	27.7652	60.2282	4.8669	0.0129706	0.154362	2.13e-16	0.123752	6.80291e-05	0.00134588	4.79214e-06	485.623	0.0652519	60.0971	0.0320072	0.917835	0.00885984	10.7428	0.0242694	0.662951	0.00232529	485.412	0.0615831	59.9429	0.0188961	1.01672	0.0059318	10.8047	0.0167612	0.663751	0.00229809	0.255027	0.0215716	0.0277187	0.0143462	0.00181511	0.00658107	0.0113994	0.0175518	0.00198544	0.000133131
	01D	ok	1.9	33.3122	0.0744969	0.903745	0.00949743	112.579	28.8541	37.524	68.0076	4.86033	0.0109685	0.141251	2.13e-16	0.139926	8.21851e-05	0.00108261	4.65642e-06	393.011	0.0582907	54.9925	0.0312265	0.781657	0.0082539	9.773	0.0239047	0.433992	0.0018287	392.795	0.0545804	54.8416	0.0202118	0.883834	0.00498161	9.8896	0.0162287	0.435181	0.00181057	0.246432	0.0204641	0.0277187	0.0143462	0.00181511	0.00658107	0.0113994	0.0175518	0.00195959	0.000126627
	01E	ok	2.2	33.3628	0.0788239	0.843766	0.00895395	25.7353	2.00074	45.2709	70.1283	4.86777	0.0116059	0.11213	2.13e-16	0.144069	9.53641e-05	0.00101084	5.1434e-06	303.015	0.0566786	43.6563	0.0276968	0.702119	0.00870097	8.30812	0.0236064	0.313549	0.00155724	302.792	0.0529837	43.5418	0.0186346	0.713683	0.00569177	8.39656	0.0157859	0.314924	0.00154301	0.23779	0.0201296	0.0277187	0.0143462	0.00181511	0.00658107	0.0113994	0.0175518	0.0019336	0.000124964
	01F	ok	3	33.1781	0.077689	0.505115	0.00520588	73.9226	12.32	55.6518	65.8274	4.84059	0.0114376	0.150257	2.13e-16	0.135993	7.38272e-05	0.00115639	4.72363e-06	430.16	0.0605145	58.5184	0.0306295	0.862189	0.00868923	18.5922	0.0250746	0.513645	0.00203038	429.928	0.0568961	58.3713	0.0193216	0.954541	0.00567382	18.697	0.0179073	0.514637	0.00200947	0.229172	0.0206118	0.0277187	0.0143462	0.00181511	0.00658107	0.0113994	0.0175518	0.00190768	0.000128366
	01G	ok	5	33.4141	0.0741903	0.340274	0.00348179	76.359	8.86544	70.9972	61.9577	4.87533	0.0109239	0.222112	2.13e-16	0.127086	5.71827e-05	0.00128735	4.0463e-06	680.435	0.0738543	86.5351	0.0376438	1.30517	0.00854755	40.7885	0.0253127	0.911532	0.00275091	680.209	0.0705466	86.3259	0.021679	1.40883	0.00545437	40.8874	0.0182391	0.911789	0.00271185	0.220554	0.0218547	0.0277187	0.0143462	0.00181511	0.00658107	0.0113994	0.0175518	0.00188176	0.000136443
pX	01H	ok	7	33.5771	0.102054	0.468376	0.00489682	102.1	41.888	76.8054	65.5094	4.89934	0.015028	0.084069	2.13e-16	0.133713	0.000104751	0.00116716	6.25038e-06	244.78	0.0544835	32.7432	0.0245603	0.476051	0.00873153	11.2145	0.0240741	0.295477	0.00152838	244.548	0.0490398	32.6666	0.0170934	0.574672	0.00573839	11.2863	0.0164772	0.29681	0.00151259	0.211936	0.0237391	0.0277187	0.0143462	0.00181511	0.00658107	0.0113994	0.0175518	0.00185584	0.000148434
pX	01I	ok	10	33.6093	0.07338	0.441791	0.00453165	97.4203	16.4979	89.6877	62.0097	4.90407	0.0108058	0.186461	2.13e-16	0.126447	6.08212e-05	0.00128559	3.94395e-06	574.105	0.0673372	72.6266	0.033799	1.07849	0.00825703	26.3655	0.0246283	0.761063	0.00226214	573.849	0.0620575	72.4461	0.0211678	1.17807	0.00498679	26.4537	0.0172767	0.761537	0.00222606	0.203282	0.0261376	0.0277187	0.0143462	0.00181511	0.00658107	0.0113994	0.0175518	0.00182982	0.000163548
pX	01J	ok	15	33.6793	0.0855197	0.432236	0.00444372	94.9418	19.6883	100	62.0856	4.91438	0.0125939	0.149263	2.13e-16	0.126337	6.82275e-05	0.00128302	4.78429e-06	459.975	0.0627503	58.1389	0.0303148	0.864481	0.0083575	21.5655	0.024546	0.608975	0.00219882	459.701	0.0566955	58.0067	0.0201077	0.963169	0.00515143	21.6611	0.0171592	0.609686	0.00217126	0.191435	0.0268928	0.0277187	0.0143462	0.00181511	0.00658107	0.0113994	0.0175518	0.00179628	0.000168221
Integrated K/Ca ±2σ						0.552809	0.0113056	SD
Plateau Age ±2σ				33.3247	0.0813242	n=5/10	MSWD = 1.35	steps C-G
Total Integrated Age ±2σ				33.0733	0.0791332									K2O wt. %=1.45
Isochron Age ±2σ				33.9071	0.0861815		MSWD = *8.05
(40Ar/36Ar)trapped ±2σ				287.918	0.958417
	Sample:	18L-6			Identifier:	67292
	Material:	Biotite
	Weight:	3.61 mg
X	01A	outlier	0.5	26.1124	0.675155	1.71386	0.0443382	2.30652	0.110602	0.906379	12.5508	3.81461	0.0993345	0.0825093	4e-16	0.0329021	9.54625e-05	0.00295936	9.77718e-06	221.391	0.0529667	7.28422	0.0210581	0.421802	0.00995106	1.24625	0.0293854	0.65578	0.00215882	222.433	0.0427696	7.22542	0.0138101	0.51252	0.004753	1.3588	0.0158837	0.648638	0.00205827	1.29753	0.0277863	0.0264523	0.0137433	0.00561739	0.00732959	0.0438126	0.0189578	0.00647229	0.000227779
X	01B	outlier	0.8	34.3726	0.169795	3.20925	0.0882005	26.7969	8.55971	2.4513	63.0545	5.03266	0.0250947	0.140637	4e-16	0.125293	0.00022127	0.00125024	9.6672e-06	99.0968	0.0445633	12.4148	0.0211991	0.204433	0.00985498	1.13474	0.0288607	0.124438	0.000956238	100.139	0.0319792	12.3363	0.0150808	0.288673	0.00496984	1.25315	0.0145541	0.128407	0.000907699	1.32084	0.0262684	0.0273002	0.0129838	0.00471739	0.00692267	0.0413943	0.0179246	0.00655033	0.000215368
	01C	ok	1	34.4987	0.137162	4.07427	0.141008	30.8534	11.9958	3.94592	79.2807	5.05129	0.0202732	0.136058	4e-16	0.156954	0.000294815	0.000701108	9.38084e-06	76.5311	0.0421459	12.0103	0.0215653	0.181362	0.010081	0.864808	0.0285198	0.0540714	0.000717162	77.6147	0.0299849	11.9313	0.0151544	0.262739	0.00517998	0.94855	0.0149047	0.0595733	0.000670872	1.34307	0.0249557	0.0281091	0.0123196	0.00385891	0.00656531	0.0390875	0.0170332	0.00662477	0.000204661
	01D	ok	1.5	34.1382	0.0436939	4.20257	0.054806	51.6253	7.69697	9.79701	85.0334	4.99802	0.00645687	0.532634	4e-16	0.170138	9.49025e-05	0.000506421	3.2248e-06	276.386	0.0536156	47.0173	0.024578	0.655931	0.00898766	3.28173	0.0265554	0.141541	0.000890715	277.506	0.0457503	46.766	0.0160314	0.726663	0.00486559	3.41443	0.014867	0.145305	0.000845217	1.36634	0.0237471	0.0289559	0.0116985	0.00296012	0.0062291	0.0366724	0.0162152	0.00670269	0.000194838
	01E	ok	1.7	33.8643	0.0378632	5.03756	0.0654033	61.8648	8.94127	17.012	88.4886	4.95754	0.0055944	0.656795	4e-16	0.178497	9.26661e-05	0.000389486	2.91508e-06	324.854	0.0562656	57.9766	0.028359	0.78761	0.00893676	3.37626	0.0270041	0.128145	0.000946559	326.01	0.0493188	57.6591	0.0189705	0.867004	0.00500599	3.49111	0.0141897	0.132268	0.00090411	1.38968	0.022732	0.029805	0.0111643	0.0020589	0.00593745	0.0342508	0.0155317	0.00678084	0.000186634
	01F	ok	1.9	33.706	0.0356801	7.5752	0.120654	55.9868	8.65719	23.9301	90.2082	4.93415	0.00527139	0.629764	4e-16	0.182828	9.63492e-05	0.000331291	2.76859e-06	304.105	0.0560695	55.5891	0.0274296	0.757324	0.010159	2.15381	0.0262526	0.10178	0.000841593	305.278	0.0494714	55.2846	0.0173359	0.841743	0.0051469	2.245	0.0135171	0.106593	0.000802289	1.43316	0.021459	0.031387	0.0104514	0.000379788	0.00553941	0.029739	0.0146863	0.00692642	0.000176497
	01G	ok	2	33.6601	0.0511912	9.41596	0.2623	92.578	39.5091	27.7428	90.2222	4.92738	0.0075628	0.347075	4e-16	0.183108	0.000140218	0.000330817	4.00491e-06	167.342	0.0442193	30.6359	0.022013	0.402859	0.00939029	0.955194	0.0246769	0.055817	0.000669898	168.572	0.0367684	30.4903	0.0158716	0.494004	0.00504947	1.04794	0.0147277	0.0617258	0.000631471	1.47541	0.0211015	0.0329241	0.010169	-0.0012517	0.00536594	0.0253552	0.0144715	0.00706788	0.000173941
	01H	ok	2.1	33.7856	0.0678207	11.0887	0.549401	53.3044	18.4842	30.2573	91.2082	4.94592	0.0100203	0.228901	4e-16	0.184415	0.000200119	0.000297449	5.231e-06	109.582	0.0418333	20.2048	0.0205203	0.275653	0.0087482	0.535121	0.0258505	0.0328519	0.000572934	110.835	0.0334302	20.0925	0.0152222	0.3579	0.00501945	0.634883	0.0148173	0.0393146	0.000532408	1.49761	0.0212805	0.0337318	0.0101962	-0.00210896	0.00536706	0.0230517	0.0146103	0.00714221	0.000175624
	01I	ok	2.5	33.4716	0.0237666	17.3404	0.37232	56.7843	5.51042	40.6401	94.1409	4.89953	0.00351083	0.945169	4e-16	0.192147	7.69394e-05	0.000198198	1.85777e-06	434.275	0.0545822	83.4277	0.0316903	1.12249	0.0093254	1.41542	0.0265839	0.0867518	0.000806574	435.543	0.0485215	83.0051	0.0205093	1.20239	0.00492123	1.5068	0.0147382	0.0921672	0.000767135	1.51987	0.0217082	0.0345418	0.0103451	-0.00296866	0.00543262	0.0207417	0.0149192	0.00721675	0.00017935
	01J	ok	3	33.4597	0.0219074	20.0205	0.474297	51.2796	4.023	51.7142	95.1473	4.89777	0.00323617	1.00809	4e-16	0.194271	7.49899e-05	0.000164139	1.69821e-06	458.121	0.0633024	88.9813	0.0320399	1.20526	0.00885571	1.3084	0.02779	0.0758244	0.000777767	459.429	0.057417	88.558	0.0194692	1.27221	0.00514844	1.4318	0.0144493	0.0815411	0.000737175	1.5421	0.0223691	0.0353506	0.01061	-0.00382715	0.00556021	0.0184349	0.0153869	0.00729119	0.000184984
	01K	ok	3.5	33.433	0.0233637	21.3491	0.567153	54.4674	5.7057	61.3749	94.3838	4.89383	0.00345123	0.879428	4e-16	0.192868	7.91867e-05	0.000189979	1.79665e-06	402.56	0.0547006	77.6246	0.0300495	1.04755	0.00980313	1.07064	0.0260789	0.0769921	0.000723045	403.912	0.047381	77.2375	0.0194209	1.12323	0.0051853	1.15221	0.015269	0.0827669	0.000679558	1.5643	0.0232424	0.0361583	0.0109822	-0.00468441	0.00574544	0.0161314	0.0159989	0.00736552	0.000192352
	01L	ok	5	33.3869	0.018357	33.6939	0.661222	58.2117	3.01122	84.504	92.2251	4.88702	0.0027116	2.10549	4e-16	0.188719	5.75025e-05	0.000263036	1.37171e-06	984.977	0.0922999	185.844	0.0538071	2.50736	0.0102398	1.62991	0.0269933	0.259864	0.00135077	986.39	0.0875484	184.958	0.0261301	2.59065	0.00472125	1.71532	0.0141816	0.261921	0.00129631	1.58811	0.0243899	0.0370247	0.0114889	-0.00560395	0.00600223	0.0136606	0.0167982	0.00744525	0.00020197
X	01M	outlier	6	33.4199	0.037339	37.7495	2.3285	49.6863	5.70528	92.1813	88.7674	4.8919	0.0055156	0.698881	4e-16	0.181462	8.51622e-05	0.000380051	3.00209e-06	340.021	0.0540299	61.6878	0.027225	0.852493	0.00940019	0.483402	0.0290675	0.129456	0.00102044	341.39	0.0453384	61.3887	0.0176192	0.92955	0.00483751	0.597932	0.0143807	0.134295	0.000972656	1.61176	0.0257175	0.0378853	0.012089	-0.00651739	0.00630974	0.0112061	0.0177193	0.00752445	0.00021305
	01N	ok	7	33.5828	0.0495172	41.7895	4.47395	49.4183	9.6071	97.0585	87.0803	4.91596	0.00731519	0.443973	4e-16	0.177142	0.000115479	0.000437147	3.85313e-06	221.27	0.0523917	39.1879	0.0237946	0.54458	0.0102369	0.277689	0.0292201	0.0968598	0.000852132	222.654	0.0417977	39.0002	0.0154923	0.620947	0.00530818	0.360197	0.0149964	0.102455	0.00080094	1.63548	0.0272089	0.0387482	0.0127738	-0.00743327	0.00666327	0.00874516	0.0187512	0.00760386	0.000225461
	01O	ok	15	33.7411	0.0726657	15.3417	0.973206	47.366	14.2194	100	85.2575	4.93934	0.0107358	0.267774	4e-16	0.172613	0.00017184	0.000498835	5.47879e-06	136.956	0.0475103	23.6358	0.0220516	0.331787	0.0099694	0.452515	0.0281956	0.0685355	0.000749833	138.385	0.0330979	23.5216	0.0143891	0.407353	0.00511262	0.53111	0.0133297	0.074791	0.000693147	1.65781	0.0287372	0.0395605	0.0134831	-0.00829542	0.0070313	0.00642855	0.0198066	0.00767861	0.000238153
Integrated K/Ca ±2σ						12.2514	0.283179	SD
Total integrated Age ±2σ				33.5177	0.0227098	n=12/15	MSWD = *42.74
Total Integrated Age ±2σ				33.5177	0.0227098									K2O wt. %=9.10
Isochron Age ±2σ				33.1376	0.056119		MSWD = *12.74
(40Ar/36Ar)trapped ±2σ				336.791	4.76919
	Sample:	18L-1			Identifier:	67290
	Material:	Biotite
	Weight:	3.01 mg
pX	01A	ok	0.5	37.4802	2.51948	4.2462	3.69568	2.94868	2.76943	0.134334	73.2586	5.48105	0.37223	0.0062094	4e-16	0.13366	0.00626286	0.000904911	0.000119287	3.42678	0.0402423	0.457964	0.0207716	0.0164787	0.00969843	0.0318306	0.0276261	0.00311653	0.000406919	5.36048	0.0245232	0.447077	0.0127065	0.091011	0.00452718	0.0990216	0.0145746	0.0133103	0.0003147	2.2079	0.0289077	0.0306926	0.0146156	-0.000666021	0.00688493	0.00115186	0.019567	0.0102584	0.000244413
pX	01B	ok	0.8	34.6086	0.340668	48.9563	59.2584	28.1412	30.2021	1.22351	76.9265	5.05713	0.0502516	0.0503457	4e-16	0.152118	0.00093266	0.000780779	2.00083e-05	24.413	0.0424661	3.71288	0.0218282	0.05724	0.00943553	0.0226847	0.0270544	0.0190719	0.00048715	26.3282	0.0292867	3.70036	0.0144341	0.136012	0.00492716	0.1243	0.0144983	0.0288536	0.000419175	2.17035	0.0269172	0.0290723	0.0136088	0.00038566	0.00641272	0.004452	0.0182347	0.0101777	0.00022738
pX	01C	ok	1	34.5955	0.278727	993.595	22487.3	18.7656	11.8756	2.43369	87.9604	5.05519	0.0411145	0.055939	4e-16	0.174004	0.000907604	0.000407364	1.83753e-05	23.7135	0.0399544	4.12535	0.0203636	0.0663153	0.00926976	0.00159282	0.0276905	0.00966109	0.000435224	25.5699	0.0272463	4.10346	0.0135605	0.144055	0.00481045	0.0873899	0.0154517	0.0195578	0.000369525	2.13291	0.0251709	0.0274567	0.0127251	0.0014343	0.00600018	0.00774262	0.0170799	0.0100973	0.000212243
pX	01D	ok	1.5	33.9203	0.0819494	2.50056	0.0412236	42.9513	14.5352	7.56353	89.9703	4.95562	0.0120837	0.237121	4e-16	0.181556	0.000240661	0.000339344	6.17257e-06	96.3383	0.0422786	17.4894	0.0218705	0.245136	0.00917303	2.06202	0.0265503	0.0336763	0.000594303	98.1431	0.031486	17.4639	0.0153182	0.324416	0.00507732	2.12368	0.0142167	0.0430007	0.000546217	2.09617	0.0237398	0.0258715	0.0120004	0.00246319	0.00566431	0.0109712	0.0161514	0.0100183	0.000199592
	01E	ok	2.5	33.532	0.0202255	22.5116	0.533313	56.0104	5.09139	34.0923	96.8606	4.89837	0.0029817	1.22626	4e-16	0.197745	8.13027e-05	0.000106157	1.4561e-06	457.424	0.060334	90.4347	0.0351862	1.20975	0.00957861	1.19152	0.0252853	0.0491276	0.000665884	459.221	0.0540231	90.379	0.0217722	1.29403	0.00496742	1.28733	0.0152438	0.0580514	0.000623098	2.05905	0.0226323	0.0242699	0.011439	0.00350271	0.00540734	0.0142332	0.0154566	0.00993858	0.000189471
	01F	ok	3	33.5342	0.0261238	30.9633	1.64677	-39.8479	4.7087	50.364	97.1493	4.8987	0.00385124	0.752139	4e-16	0.198322	0.000101848	9.6385e-05	1.94449e-06	279.75	0.0520299	55.4688	0.0265364	0.582574	0.0108901	0.532613	0.0275359	0.0272107	0.000543767	281.499	0.0448855	55.4239	0.0183042	0.676516	0.00823514	0.598923	0.0147889	0.0365063	0.000499937	2.02156	0.0219111	0.022652	0.0110724	0.00455287	0.00524417	0.0175286	0.0150373	0.009858	0.000182415
	01G	ok	3.5	33.4741	0.0247885	26.8369	1.34217	19.1194	1.57406	64.8928	99.0127	4.88983	0.00365427	0.671573	4e-16	0.202492	0.000108725	3.33221e-05	1.73825e-06	244.64	0.0474776	49.5273	0.024781	0.772805	0.0141332	0.547913	0.0266037	0.00841942	0.000425034	246.383	0.0392236	49.4874	0.0169264	0.744571	0.00529952	0.604738	0.0152395	0.0180219	0.000375751	1.984	0.0216295	0.0210317	0.0109278	0.00560455	0.00518703	0.0208288	0.0149261	0.00977731	0.000178916
	01H	ok	5	33.4856	0.0166261	32.7739	1.13341	56.1139	4.97872	90.9088	99.0061	4.89152	0.002451	1.20256	4e-16	0.202409	7.93386e-05	3.35465e-05	1.04234e-06	438.247	0.0572279	88.6862	0.0327439	1.17989	0.00914268	0.804706	0.0263145	0.0150869	0.000456602	439.924	0.0510794	88.5829	0.0204029	1.09478	0.00521436	0.863728	0.0148668	0.0244729	0.000409516	1.94645	0.0218059	0.0194114	0.0110146	0.00665624	0.00523969	0.0241289	0.0151305	0.00969661	0.000179196
	01I	ok	6	33.4823	0.0913598	26.9481	6.22629	43.123	24.2145	94.0504	99.214	4.89105	0.0134681	0.145217	4e-16	0.202853	0.000406663	2.65122e-05	6.32947e-06	52.8052	0.0398661	10.7095	0.0198872	0.146249	0.00929116	0.117955	0.0270042	0.00145663	0.000333966	54.4308	0.0294726	10.6832	0.0142026	0.0549599	0.00500756	0.223487	0.0148087	0.0110427	0.000270891	1.90906	0.0224257	0.0177981	0.0113256	0.00770336	0.00539805	0.0274147	0.0156353	0.00961627	0.000183212
	01J	ok	7	33.7324	0.116991	111.979	126.309	155.147	400.565	96.5741	98.4392	4.92791	0.017249	0.116657	4e-16	0.199764	0.000491881	5.27332e-05	8.26889e-06	43.0762	0.0391347	8.60318	0.0196879	0.108076	0.00954124	0.0233842	0.0255076	0.00228247	0.000355965	44.6476	0.0290264	8.56932	0.0137709	0.193804	0.00504467	0.147694	0.0144677	0.0117711	0.000291773	1.87173	0.023452	0.0161872	0.0118421	0.00874896	0.00565278	0.0306958	0.0164118	0.00953604	0.000190709
	01K	ok	15	33.5577	0.0928827	34.783	10.1229	100.783	121.031	100	96.1325	4.90216	0.0136932	0.158356	4e-16	0.196107	0.00036018	0.000130796	6.81406e-06	59.5639	0.0403859	11.6784	0.0199325	0.150318	0.00927195	0.0998584	0.0287391	0.00783812	0.000405591	61.1182	0.0283201	11.6323	0.0133128	0.23536	0.00444576	0.188112	0.0141227	0.0171334	0.000342286	1.83417	0.0248439	0.0145669	0.0125436	0.00980064	0.00599393	0.033996	0.0174307	0.00945534	0.000201372
Integrated K/Ca ±2σ						28.2098	1.34332	SD
Plateau Age ±2σ				33.5059	0.026688	n=7/11	MSWD = 1.69	steps E-K
Total Integrated Age ±2σ				33.5661	0.0251727									K2O wt. %=4.62
Isochron Age ±2σ				33.4319	0.0475224		MSWD = 1.31
(40Ar/36Ar)trapped ±2σ				330.654	10.3757
	Sample:	19L-2			Identifier:	67298
	Material:	Biotite
	Weight:	3.63 mg
X	01A	outlier	0.5	9.73625	0.355114	11.954	1.22969	3.67062	0.184765	1.53712	10.3663	1.41646	0.0518006	0.14043	4e-16	0.073185	0.000128912	0.00303329	1.17334e-05	170.28	0.0509084	12.4596	0.0216277	0.473865	0.0112644	0.301403	0.0307346	0.516661	0.0019919	170.676	0.039395	12.3772	0.0142976	0.402356	0.00680989	0.394055	0.014511	0.509748	0.00191207	0.632405	0.0281695	0.0138489	0.0136195	0.0123078	0.00639926	0.0327893	0.021379	0.00381276	0.000190957
X	01B	outlier	0.8	22.6816	0.116618	26.8506	3.08572	142.24	110.051	4.6801	51.316	3.3115	0.0171318	0.287141	4e-16	0.154966	0.000149245	0.00164748	8.34595e-06	164.433	0.0482281	25.4761	0.0233672	0.370656	0.00921736	0.275561	0.0312855	0.271028	0.00136992	164.86	0.038284	25.3328	0.0159103	0.47827	0.00467917	0.389941	0.015636	0.26928	0.00131756	0.647515	0.0266814	0.0136191	0.0129233	0.0120313	0.00606865	0.0322123	0.0202419	0.00387658	0.000180935
X	01C	outlier	1	27.431	0.0819854	26.1809	2.29862	60.4019	17.8345	8.23111	68.1538	4.01011	0.0120754	0.324418	4e-16	0.169959	0.000144262	0.00107765	6.37779e-06	169.392	0.0481016	28.7836	0.0230196	0.413885	0.00935472	0.319176	0.0276106	0.182699	0.00107898	169.798	0.039299	28.6394	0.0156895	0.502208	0.00506397	0.400369	0.0150566	0.182848	0.00103578	0.662645	0.025308	0.013389	0.0123008	0.0117545	0.00576997	0.0316346	0.0191859	0.00394048	0.000171744
X	01D	outlier	1.5	31.6119	0.0338019	27.7734	0.785054	75.8422	7.30888	21.3349	82.8776	4.62661	0.00498998	1.19715	4e-16	0.179137	6.80652e-05	0.000579372	2.64674e-06	593.057	0.0719587	106.215	0.038213	1.44149	0.00870356	1.1106	0.0290139	0.344135	0.00156899	593.504	0.0662748	105.708	0.0212087	1.5417	0.00524912	1.19922	0.0140691	0.341004	0.00151131	0.677831	0.0240669	0.013158	0.0117631	0.0114766	0.00550804	0.0310547	0.0182233	0.00400461	0.000163509
	01E	ok	1.7	32.855	0.0280292	13.4944	0.210728	65.6325	5.72626	35.3593	87.691	4.81019	0.0041406	1.28126	4e-16	0.182307	6.51527e-05	0.000416478	2.20748e-06	623.686	0.069297	113.679	0.0385756	1.5384	0.00976953	2.43539	0.0286423	0.260936	0.00137634	624.149	0.064033	113.141	0.0213655	1.63047	0.00502544	2.53855	0.0151857	0.259589	0.00132792	0.692961	0.0229895	0.0129279	0.0113265	0.0111998	0.00529039	0.030477	0.0173775	0.00406851	0.000156448
	01F	ok	1.9	32.8839	0.0278087	11.065	0.157447	65.9083	6.2584	47.6004	87.5075	4.81446	0.00410809	1.11834	4e-16	0.181764	6.75033e-05	0.00042269	2.14808e-06	546.009	0.076585	99.2252	0.0340883	1.34326	0.00928569	2.58943	0.0255633	0.232054	0.0011723	546.495	0.0724796	98.7373	0.0201629	1.43517	0.00517061	2.66753	0.01345	0.231456	0.00112873	0.727844	0.0212367	0.0123973	0.0107578	0.0105615	0.00498237	0.029145	0.0159519	0.00421584	0.000145382
	01G	ok	2	32.9367	0.0326536	8.88002	0.131354	62.6501	7.07458	56.7009	88.5569	4.82225	0.00482394	0.831412	4e-16	0.183647	7.6972e-05	0.000387173	2.6337e-06	401.759	0.0551646	73.7677	0.0291901	0.999634	0.00871538	2.39671	0.0255711	0.156719	0.00105777	402.246	0.0492734	73.3951	0.018845	1.08971	0.00494966	2.48684	0.0149131	0.157757	0.00102082	0.743425	0.0208354	0.0121604	0.0107208	0.0102764	0.00494235	0.0285501	0.0155923	0.00428164	0.000143129
	01H	ok	2.1	32.9278	0.0405545	5.88688	0.0937561	60.39	10.7948	62.3758	87.9656	4.82094	0.00599113	0.518458	4e-16	0.18247	0.00010406	0.000407184	3.19881e-06	252.147	0.0502003	46.0015	0.024572	0.62647	0.00901853	2.25199	0.0274574	0.10377	0.000806152	252.629	0.0435292	45.7592	0.0175966	0.713356	0.0054683	2.33588	0.0147946	0.105967	0.000773487	0.758667	0.0206931	0.0119285	0.0108184	0.00999754	0.00496441	0.0279681	0.0154247	0.00434602	0.000142665
X	01I	outlier	2.5	32.8282	0.033925	8.05048	0.113007	59.5568	6.41476	71.9567	87.5796	4.80622	0.00501147	0.875306	4e-16	0.182225	8.06792e-05	0.000420249	2.69624e-06	426.268	0.0619765	77.6625	0.0324557	1.05966	0.0092045	2.78151	0.0267127	0.180496	0.00114889	426.795	0.0567389	77.26	0.0216612	1.14603	0.00503611	2.90297	0.0151469	0.181163	0.00110963	0.773816	0.0208019	0.0116982	0.0110429	0.00972036	0.00504556	0.0273896	0.0154447	0.00441	0.000143925
	01J	ok	3	32.9146	0.0293316	7.16094	0.0966249	68.0654	8.24858	81.3301	89.6712	4.81899	0.00433313	0.856344	4e-16	0.186083	8.3033e-05	0.000349464	2.28554e-06	408.388	0.0546893	75.9805	0.0323185	1.02006	0.00886531	3.0579	0.0268984	0.14421	0.000933032	408.934	0.0484844	75.5904	0.0197265	1.10954	0.00479369	3.15472	0.0148612	0.145692	0.000896919	0.788964	0.0211564	0.0114678	0.011387	0.00944318	0.00518295	0.0268112	0.01565	0.00447398	0.000146857
pX	01K	ok	3.5	32.9706	0.028028	8.40243	0.124178	66.691	8.7029	89.825	91.0691	4.82726	0.00414068	0.776093	4e-16	0.18866	8.74338e-05	0.000302154	2.15496e-06	365.061	0.0552204	68.8597	0.030145	0.922171	0.00885591	2.36232	0.0251612	0.111458	0.000786368	365.602	0.0489863	68.5186	0.0179268	1.00851	0.00471848	2.43494	0.0150238	0.113682	0.000751551	0.804132	0.0217453	0.0112371	0.011841	0.00916566	0.00537256	0.026232	0.016034	0.00453803	0.000151371
pX	01L	ok	5	33.0074	0.0314033	11.2746	0.223894	77.2219	13.7079	97.6469	92.7252	4.8327	0.00463941	0.714603	4e-16	0.191875	9.89161e-05	0.000246108	2.49863e-06	330.506	0.0537189	63.4032	0.0310017	0.836511	0.00961849	1.62218	0.0275237	0.082132	0.000825557	331.038	0.0463257	63.085	0.0194035	0.922406	0.0050301	1.7089	0.015071	0.0850203	0.000791338	0.817325	0.022434	0.0110364	0.0123155	0.00892425	0.00557574	0.0257282	0.0165037	0.00459376	0.000156477
pX	01M	ok	6	33.0821	0.0986346	5.07315	0.214102	84.6299	87.6208	99.1586	92.4311	4.84373	0.0145725	0.138108	4e-16	0.190831	0.00035516	0.000256062	7.3285e-06	64.225	0.0445319	12.2541	0.0211617	0.160987	0.00998823	0.695139	0.0283951	0.0167854	0.000470309	64.8038	0.0331316	12.1546	0.0136105	0.248017	0.00477621	0.767659	0.0150101	0.021186	0.000425759	0.853486	0.025039	0.0104864	0.0139293	0.0082626	0.00628429	0.0243474	0.0183489	0.00474648	0.000175227
pX	01N	ok	7	32.9707	0.261847	2.39432	0.150686	105.58	413.619	99.6575	90.4253	4.82728	0.0386837	0.0455773	4e-16	0.187326	0.00106548	0.000323943	1.70622e-05	21.5915	0.0403526	4.04431	0.0217224	0.0528623	0.0100004	0.485594	0.0300169	0.00723199	0.000367858	22.15	0.0271339	3.99165	0.0137948	0.138916	0.00511168	0.544345	0.0156254	0.0118843	0.000309915	0.866755	0.0262132	0.0102846	0.0146145	0.00801982	0.00658966	0.0238408	0.0191969	0.00480252	0.000183545
pX	01O	ok	15	32.5896	0.385102	3.84448	0.538235	22.0444	25.5555	100	88.4753	4.77098	0.0568806	0.0312894	4e-16	0.185449	0.00149715	0.000389934	2.59107e-05	14.9729	0.0416423	2.77632	0.021039	0.0430932	0.00972869	0.207677	0.0289186	0.0059403	0.000387346	15.574	0.0269689	2.73479	0.0126571	0.126065	0.00458484	0.304236	0.0147115	0.0106753	0.000326826	0.879987	0.0274782	0.0100834	0.0153373	0.00777772	0.00691353	0.0233355	0.0201164	0.0048584	0.000192459
Integrated K/Ca ±2σ						9.26164	0.208367	SD
Plateau Age ±2σ				32.8883	0.0281576	n=5/15	MSWD = 1.22	steps E-J
Total Integrated Age ±2σ				31.8705	0.0242923									K2O wt. %=9.14
Isochron Age ±2σ				33.1706	0.126765		MSWD = 0.66
(40Ar/36Ar)trapped ±2σ				276.973	8.54338
	Sample:	19L-3			Identifier:	67491
	Material:	Biotite
	Weight:	2.61 mg
X	01A	outlier	0.5	16.0068	0.710367	10.228	1.60613	2220.95	1481.64	0.888326	8.77887	2.34757	0.104639	0.0518601	2.13e-16	0.0373963	0.000115093	0.003087	1.21273e-05	165.118	0.0498413	6.17375	0.0189081	0.182597	0.00815174	0.158626	0.0249041	0.509778	0.00199643	166.245	0.0426217	6.09038	0.0153423	0.249382	0.00537282	0.125571	0.0153649	0.502697	0.00190058	1.24512	0.0258369	0.0295414	0.0107835	0.00558506	0.00613055	0.0259262	0.0195994	0.00571651	0.000215411
X	01B	outlier	0.8	28.2099	0.216144	8.88085	0.842351	4015.27	3299.34	2.20346	54.9162	4.15112	0.0320517	0.0767771	2.13e-16	0.132302	0.000274406	0.00152555	1.3506e-05	69.0998	0.0409042	9.14007	0.018166	0.140425	0.00822297	0.270418	0.0256427	0.105526	0.000931031	70.2928	0.032808	9.03652	0.0144151	0.208375	0.00548029	0.22388	0.0165352	0.108604	0.000881396	1.25234	0.0244292	0.0295414	0.0107835	0.00558506	0.00613055	0.0259262	0.0195994	0.00572459	0.00020356
X	01C	outlier	1	30.8409	0.170879	13.4777	1.73085	3148.59	1752.34	3.68203	68.8416	4.54156	0.0253757	0.0863181	2.13e-16	0.151594	0.000299402	0.00105424	1.19699e-05	67.8009	0.0413275	10.2758	0.0193007	0.152151	0.00798051	0.200298	0.0257195	0.0715601	0.000810247	68.9595	0.0341927	10.1663	0.0157931	0.218828	0.00510929	0.127109	0.016654	0.0754961	0.000764242	1.25924	0.0232125	0.0295414	0.0107835	0.00558506	0.00613055	0.0259262	0.0195994	0.00573231	0.000193221
pX	01D	ok	1.5	32.5981	0.0697367	24.5536	1.92923	5678.92	1998.8	8.03397	81.4876	4.80263	0.010366	0.254065	2.13e-16	0.169688	0.000131068	0.000626225	5.43335e-06	178.284	0.0478181	30.2449	0.0218933	0.410445	0.0081125	0.323555	0.025421	0.111777	0.00096805	179.479	0.0424102	30.0116	0.0185939	0.481412	0.0053131	0.253889	0.0161892	0.114714	0.000922357	1.26652	0.0220895	0.0295414	0.0107835	0.00558506	0.00613055	0.0259262	0.0195994	0.00574045	0.000183553
pX	01E	ok	1.7	32.8828	0.0629077	35.9205	4.59625	4837.44	1603.26	12.0088	85.8357	4.84495	0.00935231	0.23205	2.13e-16	0.177182	0.000141218	0.000479055	5.02115e-06	155.949	0.0431662	27.6241	0.0206328	0.37349	0.00821789	0.201972	0.0258429	0.0747899	0.000782605	157.14	0.0376014	27.4174	0.017164	0.444171	0.00547266	0.154806	0.016844	0.0786606	0.000740561	1.2734	0.0212004	0.0295414	0.0107835	0.00558506	0.00613055	0.0259262	0.0195994	0.00574815	0.000175746
pX	01F	ok	1.9	32.9217	0.0636749	24.4791	2.20466	4162.4	1246.32	15.7413	87.8669	4.85074	0.00946657	0.217901	2.13e-16	0.181159	0.000145526	0.000410304	5.22299e-06	143.226	0.0420811	25.9398	0.0193802	0.352415	0.00811328	0.278257	0.0250596	0.0588826	0.000747705	144.434	0.0367503	25.7161	0.0156919	0.42399	0.00531428	0.224896	0.0156156	0.063163	0.000707757	1.28032	0.0204996	0.0295414	0.0107835	0.00558506	0.00613055	0.0259262	0.0195994	0.00575588	0.000169405
	01G	ok	2	32.9943	0.0689092	15.2732	1.03539	3547.84	1105.69	18.8506	88.0798	4.86153	0.0102452	0.181517	2.13e-16	0.181195	0.000184377	0.000403098	5.43108e-06	119.287	0.0420914	21.6088	0.0206139	0.297375	0.00828766	0.37145	0.0251779	0.0482426	0.00064747	120.473	0.0370302	21.431	0.017236	0.364721	0.00557688	0.333143	0.0158048	0.0527952	0.000608389	1.28724	0.0200113	0.0295414	0.0107835	0.00558506	0.00613055	0.0259262	0.0195994	0.00576363	0.000164735
	01H	ok	2.1	33.0155	0.0820065	9.66349	0.555888	3946.25	1707.79	21.2928	88.9196	4.86468	0.0121926	0.142577	2.13e-16	0.182804	0.00023194	0.000374675	6.43718e-06	92.8724	0.0423384	16.9733	0.0200898	0.2309	0.00815186	0.461064	0.0265161	0.034995	0.000597442	94.0625	0.0374485	16.8227	0.0166742	0.299625	0.00537301	0.419744	0.0178596	0.0398933	0.000558948	1.29418	0.0197523	0.0295414	0.0107835	0.00558506	0.00613055	0.0259262	0.0195994	0.00577138	0.000161889
	01I	ok	2.5	33.0723	0.0330337	9.53395	0.157589	5116.32	915.824	29.4947	91.4106	4.87312	0.00491154	0.478823	2.13e-16	0.1876	8.23715e-05	0.000290359	2.75346e-06	303.924	0.0522181	57.0022	0.0229805	0.75552	0.00830459	1.5692	0.0259292	0.0889234	0.000836473	305.145	0.0483462	56.5969	0.0191886	0.827708	0.00560201	1.51941	0.0169761	0.0924703	0.00079696	1.30113	0.0197326	0.0295414	0.0107835	0.00558506	0.00613055	0.0259262	0.0195994	0.00577916	0.000160973
	01J	ok	3	33.1054	0.0214899	15.6525	0.202628	4659.05	433.704	45.9815	93.3712	4.87804	0.00319523	0.962494	2.13e-16	0.191431	5.73218e-05	0.000223999	1.79578e-06	598.702	0.0705351	114.58	0.0313882	1.52021	0.00828857	1.92096	0.0248617	0.134936	0.00107477	599.931	0.0676488	113.838	0.0266484	1.59298	0.00557824	1.86656	0.015296	0.137341	0.00103077	1.30842	0.0199712	0.0295414	0.0107835	0.00558506	0.00613055	0.0259262	0.0195994	0.00578732	0.000162132
	01K	ok	3.5	33.1028	0.0197822	50.4024	2.32152	5237.03	563.876	61.5777	95.2478	4.87765	0.00294132	0.910499	2.13e-16	0.195294	5.78954e-05	0.000160479	1.66582e-06	555.156	0.0688896	108.389	0.0290268	1.41965	0.00817619	0.56424	0.0259881	0.0893308	0.000924541	556.421	0.0657892	107.68	0.024182	1.49802	0.00540984	0.547562	0.017066	0.0928887	0.000883817	1.31534	0.020434	0.0295414	0.0107835	0.00558506	0.00613055	0.0259262	0.0195994	0.00579505	0.000165193
	01L	ok	5	33.1542	0.0141253	135.159	12.4783	5249.55	477.324	82.1914	96.2863	4.8853	0.00210028	1.20342	2.13e-16	0.197115	4.79833e-05	0.000125327	1.13049e-06	726.979	0.0799799	143.258	0.0308518	1.87107	0.00824741	0.27806	0.0256712	0.0912266	0.000821603	728.248	0.0771426	142.35	0.0244182	1.95381	0.00551689	0.229755	0.0165793	0.094742	0.000780058	1.32227	0.0211141	0.0295414	0.0107835	0.00558506	0.00613055	0.0259262	0.0195994	0.0058028	0.000170078
	01M	ok	6	33.1809	0.0271117	136.33	30.1339	4038.79	559.345	90.7963	95.6553	4.88927	0.00403128	0.502353	2.13e-16	0.195664	8.62259e-05	0.000146686	2.2356e-06	305.72	0.0536754	59.8016	0.0241131	0.797382	0.00851897	0.115058	0.025432	0.0448929	0.000683253	306.962	0.0489702	59.4029	0.0204242	0.861406	0.00591516	0.0783378	0.0162064	0.049579	0.000641503	1.32911	0.0219764	0.0295414	0.0107835	0.00558506	0.00613055	0.0259262	0.0195994	0.00581045	0.000176523
	01N	ok	7	33.1793	0.0348632	175.699	79.5896	3799.65	746.582	96.255	95.7301	4.88904	0.00518386	0.318675	2.13e-16	0.195826	0.000121814	0.000144155	2.76118e-06	193.777	0.0468557	37.936	0.0217147	0.508339	0.00842718	0.0566246	0.0256502	0.0279575	0.000534834	195.013	0.0407678	37.6553	0.0182296	0.570612	0.00578219	-0.00301065	0.0165469	0.0330744	0.000487046	1.33648	0.0230962	0.0295414	0.0107835	0.00558506	0.00613055	0.0259262	0.0195994	0.00581869	0.0001851
	01O	ok	12	33.2301	0.064346	4.16342	0.0634506	5355.35	2049.09	100	88.4901	4.89659	0.00956796	0.21863	2.13e-16	0.180735	0.000151445	0.000389213	5.22132e-06	144.042	0.0471685	26.0282	0.020061	0.346958	0.00808361	1.63915	0.024947	0.0567728	0.000751629	145.283	0.0404326	25.8266	0.0165114	0.418255	0.00526888	1.59409	0.0154342	0.061182	0.000705364	1.34335	0.0242915	0.0295414	0.0107835	0.00558506	0.00613055	0.0259262	0.0195994	0.00582637	0.000194402
Integrated K/Ca ±2σ						22.0254	0.484637	SD
Plateau Age ±2σ				33.1325	0.0291794	n=9/15	MSWD = *2.86	steps G-O
Total Integrated Age ±2σ				32.8351	0.0233819									K2O wt. %=5.84
Isochron Age ±2σ				33.2411	0.0593789		MSWD = *3.41
(40Ar/36Ar)trapped ±2σ				277.007	4.12392
	Sample:	17L-18			Identifier:	66467
	Material:	Sanidine
	Weight:	single-crystal
	01	ok	3	33.2207	0.0124633	76.0409	3.71072	-6295.25	909.465	6.16877	99.7508	9.31619	0.00352694		8e-17	0.107155	3.88748e-05	5.82581e-06	3.6485e-07	909.808	0.0633156	97.3784	0.0343102	1.171	0.00903486	0.22665	0.0108314	0.00547161	0.000331562	910.784	0.0629079	97.5687	0.0230268	1.15534	0.00805141	-0.0690801	0.0099113	0.0109765	0.000286986	0.944919	0.00717343	0.0232008	0.00869074	-0.000465867	0.0040992	0.0423884	0.00436874	0.00525642	0.000170773
	02	ok	3	33.2234	0.00902735	67.1437	1.07127	-8006	791.068	24.3255	99.6891	9.31697	0.00255462		8e-17	0.10708	2.88676e-05	7.91929e-06	1.67409e-07	2679.75	0.125603	286.617	0.0747111	3.49058	0.0105186	0.753634	0.0117852	0.0217957	0.000448147	2680.77	0.125421	287.022	0.027809	3.46966	0.00978311	0.470286	0.0110422	0.027789	0.000421638	0.944044	0.00675818	0.0236141	0.00817637	-0.000416398	0.00386422	0.042361	0.00411837	0.00524195	0.000160918
	03	ok	3	33.2591	0.0225095	71.2544	9.56475	-14572.1	14355.4	26.3513	99.6594	9.32708	0.00637002		8e-17	0.106932	6.61459e-05	8.92892e-06	9.76212e-07	299.399	0.0327895	31.9785	0.0193896	0.397441	0.00943757	0.0793149	0.0104421	0.00273392	0.000291922	300.373	0.0321632	32.0691	0.0161236	0.38097	0.00870261	-0.211564	0.00968986	0.0080625	0.000251738	0.943157	0.00637819	0.0240332	0.0076952	-0.000366255	0.00365133	0.0423331	0.00389161	0.00522727	0.000151929
	04	ok	3	33.2572	0.0125833	96.2772	8.36848	-5770.84	994.647	30.6923	99.6824	9.32653	0.00356097		8e-17	0.106963	3.78642e-05	8.15011e-06	4.82252e-07	641.389	0.0431481	68.5258	0.0235568	0.819959	0.00858767	0.126624	0.0107216	0.00531957	0.000308943	642.362	0.042722	68.6645	0.0154916	0.803413	0.00785563	-0.148472	0.0100637	0.0107007	0.000275756	0.942275	0.00604876	0.0244499	0.00726469	-0.000316381	0.00346947	0.0423055	0.00369796	0.00521268	0.000144171
	05	ok	3	33.2342	0.0100155	76.6133	1.78332	-9358.66	1336.47	43.2105	99.1074	9.32001	0.00283427		8e-17	0.10642	3.05651e-05	2.76365e-05	3.30536e-07	1859.02	0.103588	197.609	0.0547866	2.4292	0.0106579	0.456419	0.0103938	0.0516943	0.000613918	1860.01	0.103427	197.908	0.0270925	2.41225	0.0101266	0.177239	0.00977166	0.0576409	0.000602438	0.941398	0.00577733	0.0248644	0.00689298	-0.000266777	0.003323	0.0422779	0.00354211	0.00519816	0.000137824
	06	ok	3	33.2766	0.0178248	46.9199	2.7375	-6176.46	1797.67	46.0656	99.627	9.33201	0.00504434		8e-17	0.106841	5.27818e-05	1.00277e-05	7.39452e-07	422.334	0.0313265	45.0707	0.0218844	0.54172	0.00918027	0.168608	0.00971125	0.00436492	0.000311948	423.301	0.0308285	45.1734	0.0177863	0.532245	0.00859991	-0.11824	0.00908743	0.00966112	0.000284713	0.940488	0.00556367	0.0252947	0.00657694	-0.000215286	0.00321231	0.0422494	0.00342445	0.0051831	0.000132889
X	07	outlier	3	33.329	0.0235364	98.165	22.5017	-2346.87	428.654	47.6743	99.6607	9.34683	0.00666088		8e-17	0.106707	6.73422e-05	8.89117e-06	1.11649e-06	238.245	0.0263508	25.3931	0.0157156	0.275589	0.00864792	0.0460315	0.0102745	0.00214915	0.000265655	239.202	0.025785	25.4838	0.0129155	0.253556	0.00805398	-0.23492	0.00971023	0.00739188	0.000233925	0.939611	0.005431	0.0257093	0.00634956	-0.000165682	0.00314959	0.0422218	0.00335798	0.00516858	0.000129906
	08	ok	3	33.1989	0.0104609	65.0977	1.46173	-5946.25	573.033	57.7766	99.7696	9.31003	0.00296027		8e-17	0.107246	3.32377e-05	5.1873e-06	2.39491e-07	1488.7	0.0712721	159.473	0.0481542	1.91098	0.00941628	0.432041	0.00952245	0.00805279	0.00035616	1489.69	0.0710691	159.705	0.0239718	1.89541	0.0088799	0.147594	0.00891733	0.0135554	0.000334808	0.938722	0.00537535	0.0261294	0.00620491	-0.000115404	0.00313271	0.0421939	0.0033404	0.00515387	0.000128781
	09	ok	3	33.2795	0.0182694	59.9383	4.51019	-4409.92	961.534	60.4286	99.4686	9.33284	0.00517015		8e-17	0.106661	5.38681e-05	1.53954e-05	7.65595e-07	392.939	0.0328184	41.8632	0.0207335	0.491596	0.00896291	0.122995	0.00910449	0.00614002	0.000300502	393.914	0.0323708	41.9742	0.0162707	0.479275	0.00838603	-0.164885	0.00845634	0.0114281	0.000273507	0.937833	0.00540146	0.0265495	0.00615273	-6.51262e-05	0.00316357	0.042166	0.00337373	0.00513915	0.000129617
	10	ok	3	33.2608	0.0123343	66.7069	2.32398	-10648.3	2412.52	66.8305	99.6879	9.32754	0.00349053		8e-17	0.106957	3.80044e-05	7.96131e-06	3.95626e-07	945.935	0.0519152	101.058	0.0350994	1.24456	0.00855834	0.26725	0.00913958	0.00773582	0.000373866	946.914	0.0516223	101.218	0.0194312	1.21594	0.00792144	-0.0170186	0.00846123	0.0131712	0.000352536	0.936953	0.00550662	0.0269652	0.0061944	-1.53874e-05	0.00323975	0.0421384	0.00345536	0.0051246	0.000132338
	11	ok	3	33.2172	0.0143445	81.0394	5.73414	-13315.1	5519.52	71.1263	99.7977	9.31521	0.00405929		8e-17	0.107217	4.39744e-05	4.23665e-06	4.9717e-07	633.218	0.049612	67.8134	0.0270736	0.840314	0.0088928	0.148096	0.0102495	0.00279711	0.000314456	634.182	0.0490857	67.9204	0.0174009	0.811559	0.00779023	-0.135022	0.00917182	0.00799454	0.000264747	0.926359	0.00720737	0.0286823	0.0078468	0.000213643	0.00428886	0.0415054	0.00457489	0.00502686	0.000173856
	12	ok	3	33.266	0.023611	102.933	22.588	-3570.23	975.323	72.9404	99.7804	9.32902	0.00668177		8e-17	0.10704	6.91827e-05	4.82857e-06	1.04249e-06	267.837	0.0242662	28.6361	0.0182568	0.329005	0.00958545	0.0495213	0.0105683	0.00132859	0.000278863	268.772	0.023287	28.7081	0.0148323	0.325105	0.0086823	-0.232943	0.00964041	0.00643314	0.000227614	0.921066	0.00682392	0.0277164	0.00744761	0.000122877	0.00406183	0.0410226	0.00433038	0.00502105	0.000164576
	13	ok	3	33.2588	0.0123988	93.3155	5.66441	-9919.02	2381.62	78.2543	99.6426	9.32699	0.00350877		8e-17	0.106915	3.80538e-05	9.49813e-06	4.10065e-07	785.491	0.0543192	83.8839	0.0289722	1.03072	0.00828715	0.15959	0.00944322	0.00757893	0.000321755	786.44	0.0539327	83.9932	0.0185028	1.01034	0.00733719	-0.126025	0.00850531	0.0128452	0.000284073	0.915759	0.00646876	0.0267479	0.00709403	3.18671e-05	0.00385259	0.0405384	0.00410293	0.00501522	0.000155954
	14	ok	3	33.2793	0.0136889	91.0157	7.96067	-8896.18	2870.62	82.2413	99.7817	9.33279	0.0038739		8e-17	0.106998	4.18002e-05	4.78387e-06	4.73558e-07	588.885	0.0390957	62.9367	0.0240115	0.769596	0.00973529	0.122677	0.0104673	0.00291013	0.000278519	589.823	0.0386089	63.0332	0.0173467	0.743033	0.00901853	-0.160647	0.00971444	0.00805018	0.000238192	0.910494	0.0061505	0.0257872	0.00679668	-5.84091e-05	0.00366634	0.0400581	0.0038979	0.00500944	0.000148196
	15	ok	3	33.2391	0.0180707	98.8378	13.6972	-4054.6	886.572	84.7627	99.7	9.32142	0.00511382		8e-17	0.10704	5.38153e-05	7.55021e-06	7.40718e-07	372.271	0.0324597	39.8021	0.0195942	0.463353	0.00932131	0.0715865	0.00965814	0.00286181	0.000275416	373.203	0.0319247	39.8871	0.0159751	0.457808	0.008638	-0.216674	0.00891509	0.00797019	0.000238729	0.905173	0.00586887	0.0248161	0.00655755	-0.000149664	0.00350309	0.0395727	0.00371495	0.00500359	0.000141289
	16	ok	3	33.2481	0.0194478	93.9404	13.3057	-8460.08	3507.85	87.296	99.4006	9.32396	0.00550354		8e-17	0.10669	5.5663e-05	1.76987e-05	9.27862e-07	375.263	0.0369538	39.9906	0.0203786	0.488897	0.008484	0.0755698	0.0104341	0.00669498	0.000347813	376.181	0.0365213	40.0621	0.017054	0.482884	0.00778572	-0.217816	0.00980716	0.0118253	0.00032303	0.899937	0.00563695	0.0238606	0.00638925	-0.000239451	0.00337057	0.039095	0.00356244	0.00499784	0.000135552
	17	ok	3	33.2853	0.0212663	76.1007	5.568	-22741.5	20758.5	90.7684	93.5587	9.33448	0.00601829		8e-17	0.100302	4.05484e-05	0.000215692	1.54558e-06	547.095	0.0394299	54.814	0.0216409	0.708468	0.00943917	0.127242	0.00911827	0.11802	0.000844864	548.025	0.0390511	54.9001	0.0164696	0.659029	0.0088555	-0.16612	0.00844494	0.123993	0.00083948	0.894601	0.00545267	0.0228869	0.00629166	-0.00033095	0.00326772	0.0386082	0.00343887	0.00499198	0.000130928
	18	ok	3	33.2855	0.0162963	66.211	5.26188	-7735.46	2455.63	93.9698	99.2918	9.33453	0.0046118		8e-17	0.106452	4.62299e-05	2.13895e-05	7.90305e-07	475.283	0.040917	50.5368	0.0213515	0.615698	0.00890911	0.134466	0.0104946	0.0102638	0.000375224	476.2	0.0405687	50.6163	0.0166696	0.593116	0.00831424	-0.160133	0.00994505	0.015449	0.000355688	0.889308	0.00532713	0.021921	0.00627198	-0.000421716	0.00320088	0.0381254	0.00335151	0.00498617	0.000127693
X	19	outlier	3	33.1726	0.0149374	74.2082	6.80394	-11958.3	4743.22	97.4296	99.2596	9.30258	0.00422697		8e-17	0.106783	4.39896e-05	2.24713e-05	6.42418e-07	512.044	0.0352248	54.6148	0.0220024	0.676464	0.00767316	0.129925	0.0116738	0.0115998	0.000328547	512.964	0.0348295	54.6933	0.0164473	0.664336	0.00698724	-0.157318	0.0111972	0.0167684	0.000306008	0.883901	0.00526202	0.0209343	0.00633192	-0.000514438	0.00317109	0.0376321	0.00330141	0.00498023	0.000125886
	20	ok	3	33.2527	0.0185893	88.9479	11.3044	-5695.76	1935.33	100	99.4331	9.32526	0.0052606		8e-17	0.10671	5.42374e-05	1.65988e-05	8.22721e-07	380.682	0.0361133	40.5757	0.0201467	0.485714	0.01054	0.0808434	0.010029	0.00637586	0.00031284	381.578	0.0357279	40.6453	0.0160992	0.49042	0.0100487	-0.208471	0.00947322	0.011506	0.000288958	0.878651	0.00526209	0.0199762	0.00646543	-0.00060447	0.00318042	0.0371531	0.00329232	0.00497446	0.000125642
Weighted mean K/Ca ±2σ						68.2044	4.02352	SE but if MSWD>1 use SE * sqrt(MSWD)
Weighted mean Age ±2σ				33.2438	0.0200972	n=18/20	MSWD = *3.63
Isochron Age ±2σ				33.2402	0.0171628		MSWD = *5.17
(40Ar/36Ar)trapped ±2σ				301.5	5.83091
	Sample:	17L-17			Identifier:	67810
	Material:	Biotite
	Weight:	2.71 mg
pX	01A	ok	0.5	13.0162	0.380436	35.8134	14.3634	74.8412	55.0634	1.78962	12.5059	1.88032	0.0551533	0.107038	2.13e-16	0.0665101	0.000108665	0.00296088	1.1329e-05	201.824	0.053305	13.4178	0.0216332	0.286256	0.00877774	0.060056	0.0238187	0.597626	0.00228086	201.534	0.0452888	13.394	0.0152625	0.388241	0.00580846	0.151474	0.0161017	0.597889	0.00225651	0.175683	0.028113	0.0277187	0.0143462	0.00181511	0.00658107	0.0113994	0.0175518	0.00132851	0.000140766
pX	01B	ok	0.8	27.2597	0.12421	43.3105	12.4402	139.97	108.986	4.80625	57.6362	3.95331	0.0181479	0.180425	2.13e-16	0.145795	0.000162381	0.00143359	8.30997e-06	155.197	0.0468697	22.6173	0.0242444	0.325891	0.00836956	0.0838831	0.0237653	0.22256	0.00128771	154.862	0.0388849	22.5712	0.0176363	0.427889	0.00517099	0.149137	0.0160226	0.223505	0.00127477	0.172628	0.0261674	0.0277187	0.0143462	0.00181511	0.00658107	0.0113994	0.0175518	0.00133992	0.000131315
pX	01C	ok	1	31.8868	0.0971549	103.259	62.0457	107.616	57.5342	8.24805	72.2896	4.63021	0.0142309	0.205855	2.13e-16	0.156129	0.000149737	0.000937698	6.93888e-06	165.351	0.0464078	25.8048	0.0236621	0.356954	0.00852543	0.040857	0.0237994	0.155083	0.00114629	164.997	0.0394675	25.7614	0.0164776	0.458571	0.00541963	0.121312	0.0160731	0.156157	0.00113546	0.169536	0.024413	0.0277187	0.0143462	0.00181511	0.00658107	0.0113994	0.0175518	0.00135146	0.000123077
pX	01D	ok	1.5	33.319	0.0458752	64.6927	10.1816	102.726	22.7608	16.4234	83.7915	4.84008	0.00672488	0.488971	2.13e-16	0.173124	9.39518e-05	0.000548448	3.492e-06	354.206	0.0629221	61.2949	0.0314187	0.817067	0.00871516	0.153119	0.0235822	0.194396	0.00123618	353.901	0.0585839	61.1877	0.0192182	0.919709	0.00571344	0.224868	0.0157497	0.195411	0.00122534	0.166523	0.0229589	0.0277187	0.0143462	0.00181511	0.00658107	0.0113994	0.0175518	0.00136272	0.000116606
pX	01E	ok	1.9	33.8471	0.0312398	41.7566	3.09226	104.801	17.1756	28.0227	89.1782	4.9175	0.00458079	0.693758	2.13e-16	0.181353	8.38372e-05	0.000366148	2.35267e-06	479.749	0.0622121	86.9662	0.0385673	1.13945	0.00887788	0.334219	0.0242031	0.175952	0.00112821	479.446	0.0582733	86.8191	0.0228772	1.24639	0.00595872	0.439591	0.0166651	0.177023	0.00111783	0.163439	0.0217847	0.0277187	0.0143462	0.00181511	0.00658107	0.0113994	0.0175518	0.00137423	0.000111853
pX	01F	ok	2.1	33.4407	0.0360645	41.3276	3.34412	95.4747	15.0741	38.3786	88.4055	4.85792	0.00528708	0.619385	2.13e-16	0.181987	8.456e-05	0.000392299	2.86146e-06	426.827	0.0558307	77.6432	0.0345981	1.02412	0.0083986	0.301398	0.0238904	0.167708	0.00122091	426.539	0.0517352	77.5112	0.0207138	1.12363	0.00521785	0.380506	0.0162075	0.168797	0.00121148	0.160392	0.0209887	0.0277187	0.0143462	0.00181511	0.00658107	0.0113994	0.0175518	0.00138561	0.000109257
pX	01G	ok	2.5	33.8474	0.0264682	45.6432	2.95553	107.841	14.7801	52.6692	91.6441	4.91754	0.00388111	0.854725	2.13e-16	0.186366	7.6002e-05	0.000282698	2.0346e-06	575.163	0.0653544	107.144	0.0419322	1.39179	0.00879491	0.377017	0.0237723	0.162929	0.00116984	574.853	0.062023	106.965	0.0233301	1.49585	0.00583438	0.451859	0.016033	0.164034	0.00116035	0.157396	0.0205996	0.0277187	0.0143462	0.00181511	0.00658107	0.0113994	0.0175518	0.0013968	0.000108883
pX	01H	ok	3.5	33.7717	0.0262669	27.0231	1.05904	98.0312	12.7103	66.629	91.6207	4.90645	0.00385145	0.834942	2.13e-16	0.18674	7.41924e-05	0.00028349	2.03705e-06	560.726	0.0681275	104.665	0.0395591	1.36621	0.00896221	0.618486	0.0232054	0.159506	0.00114183	560.422	0.0649304	104.485	0.0208519	1.46652	0.00608364	0.714938	0.0151797	0.160631	0.00113213	0.154374	0.0206252	0.0277187	0.0143462	0.00181511	0.00658107	0.0113994	0.0175518	0.00140808	0.000110718
pX	01I	ok	4	33.9573	0.0399819	29.944	2.725	90.5844	21.6027	73.3181	90.2413	4.93367	0.00586302	0.400077	2.13e-16	0.182914	0.000108897	0.000330171	3.07832e-06	274.301	0.0531729	50.1519	0.02822	0.660135	0.00873601	0.267642	0.0239827	0.0908026	0.000843901	273.979	0.0488271	50.0709	0.0194761	0.759995	0.0057452	0.356076	0.0163432	0.0920676	0.000833569	0.151424	0.021054	0.0277187	0.0143462	0.00181511	0.00658107	0.0113994	0.0175518	0.0014191	0.000114552
pX	01J	ok	5	34.1181	0.0365536	17.2915	0.720865	97.2333	19.0157	81.9693	91.403	4.95724	0.00536076	0.517428	2.13e-16	0.184387	9.92561e-05	0.000290858	2.84966e-06	351.925	0.0602567	64.8632	0.0330872	0.847859	0.00858577	0.597044	0.0240025	0.102888	0.00100245	351.587	0.0561356	64.7527	0.0231603	0.943479	0.00551407	0.646504	0.0163724	0.104137	0.000992295	0.148344	0.0219015	0.0277187	0.0143462	0.00181511	0.00658107	0.0113994	0.0175518	0.0014306	0.000120497
pX	01K	ok	7	34.1228	0.0340649	21.5726	0.955777	80.9138	11.4002	91.9743	89.8145	4.95793	0.0049958	0.598403	2.13e-16	0.181157	8.6189e-05	0.000344616	2.62837e-06	414.256	0.0569758	75.0136	0.0341464	0.995426	0.00855736	0.554076	0.0237287	0.143249	0.00108839	413.92	0.0520714	74.8767	0.0218851	1.09094	0.00546973	0.62458	0.0159682	0.144443	0.00107693	0.145235	0.023126	0.0277187	0.0143462	0.00181511	0.00658107	0.0113994	0.0175518	0.00144221	0.000128232
pX	01L	ok	10	35.0576	0.0462941	23.9553	1.577	106.297	27.4124	99.1818	86.065	5.09506	0.00679273	0.431084	2.13e-16	0.168922	9.43578e-05	0.000471509	3.42185e-06	320.041	0.0561083	54.0391	0.0286497	0.715456	0.00866347	0.359647	0.0232183	0.151218	0.00109457	319.732	0.0503979	53.952	0.0187666	0.816904	0.00563429	0.461505	0.0151994	0.152404	0.00108181	0.142134	0.0246617	0.0277187	0.0143462	0.00181511	0.00658107	0.0113994	0.0175518	0.00145378	0.00013739
pX	01M	ok	15	34.3406	0.169728	14.3044	4.94851	62.3252	83.7828	100	90.7735	4.98988	0.0248945	0.0489343	2.13e-16	0.181919	0.000639339	0.000312162	1.07296e-05	33.7338	0.0412885	6.13428	0.0202073	0.082706	0.0088187	0.0681591	0.0234651	0.0105909	0.000361107	33.3887	0.0318213	6.13298	0.0140062	0.179879	0.00587018	0.14047	0.0155739	0.0120364	0.000329145	0.139275	0.0263087	0.0277187	0.0143462	0.00181511	0.00658107	0.0113994	0.0175518	0.00146446	0.00014688
Integrated K/Ca ±2σ						31.4176	1.55999	SD
Plateau Age ±2σ				No plateau age				steps C-F
Total Integrated Age ±2σ				33.2645	0.026953									K2O wt. %=5.98
Isochron Age ±2σ				34.772	0.0321572		MSWD = *295.81
(40Ar/36Ar)trapped ±2σ				226.423	1.59957
	Sample:	17L-17			Identifier:	67811
	Material:	Hornblende
	Weight:	8.91 mg
pX	01A	ok	1.5	34.9805	0.404663	0.0991805	0.00102791	17.6107	2.50952	4.06275	28.4701	5.08741	0.0594165	0.0262597	2.13e-16	0.0559622	8.28422e-05	0.00242063	1.03682e-05	193.337	0.0495245	10.8572	0.0157285	0.268367	0.00580818	17.0058	0.0182759	0.48327	0.00200071	193.507	0.0427082	10.8534	0.0150332	0.38139	0.00570435	17.0999	0.0169225	0.48693	0.00196991	0.636813	0.0250736	0.0289884	0.00239744	0.00413504	0.00109333	0.0053733	0.00690201	0.00345368	0.000171139
X	01B	outlier	2	34.109	0.0621236	0.0958424	0.00097998	22.5075	1.07382	19.8756	88.2405	4.95948	0.00911726	0.102206	2.13e-16	0.177927	0.000110681	0.000397886	5.10877e-06	236.681	0.0557267	42.2633	0.0238101	0.686966	0.0058117	68.424	0.0209105	0.155695	0.00120542	236.848	0.0521526	42.2239	0.018747	0.794367	0.00570794	68.5535	0.0197386	0.159151	0.00119402	0.648591	0.0196359	0.0289884	0.00239744	0.00413504	0.00109333	0.0053733	0.00690201	0.00338852	0.000136177
	01C	ok	2.5	33.8921	0.0740226	0.0963816	0.000984877	22.4518	0.803225	40.5463	74.5872	4.92766	0.0108623	0.133606	2.13e-16	0.151367	7.69519e-05	0.000859945	5.20545e-06	363.679	0.0544816	55.2461	0.0260796	0.933736	0.00560552	88.9297	0.0214985	0.392715	0.00188877	363.865	0.0509691	55.182	0.0191128	1.04333	0.00549786	89.0346	0.0203604	0.396264	0.00186782	0.65053	0.0192455	0.0289884	0.00239744	0.00413504	0.00109333	0.0053733	0.00690201	0.0033778	0.000134226
	01D	ok	3	33.8418	0.0468137	0.0964889	0.0009861	21.8109	0.850643	59.294	93.8578	4.92026	0.00686937	0.121176	2.13e-16	0.190762	0.000102026	0.000207779	4.07525e-06	261.728	0.0494374	50.106	0.0243943	0.808162	0.00575646	80.5529	0.0214465	0.126837	0.0010611	261.947	0.0456271	50.0446	0.0191389	0.918781	0.00565168	80.6766	0.0203056	0.130267	0.00104995	0.652468	0.0190324	0.0289884	0.00239744	0.00413504	0.00109333	0.0053733	0.00690201	0.00336707	0.000133566
	01E	ok	3.5	33.8234	0.0543685	0.095551	0.000977923	21.5902	1.47697	70.3773	98.0558	4.91757	0.00797787	0.0716371	2.13e-16	0.199404	0.000148898	6.57084e-05	4.77356e-06	148.024	0.0451551	29.623	0.0198537	0.474731	0.00616587	48.0811	0.0190766	0.0529815	0.000703534	148.185	0.0409633	29.5946	0.0178131	0.580141	0.00606816	48.1822	0.0177842	0.0563658	0.000690083	0.654323	0.0189999	0.0289884	0.00239744	0.00413504	0.00109333	0.0053733	0.00690201	0.00335681	0.00013416
	01F	ok	4	33.7275	0.102179	0.0936358	0.000964933	22.7903	2.97182	75.8485	91.3651	4.9035	0.0149927	0.0353632	2.13e-16	0.186331	0.000247942	0.000292138	8.46702e-06	78.1975	0.0413585	14.6244	0.0177102	0.235618	0.00553429	24.2165	0.0184074	0.0446331	0.000660992	78.3749	0.036668	14.6152	0.0170447	0.340884	0.00542522	24.3331	0.0170645	0.0480039	0.000646519	0.656133	0.0191308	0.0289884	0.00239744	0.00413504	0.00109333	0.0053733	0.00690201	0.0033468	0.000135882
X	01G	outlier	4.5	34.1591	0.111014	0.0973773	0.00101016	23.6586	4.47234	79.9764	95.648	4.96683	0.0162929	0.0266807	2.13e-16	0.192578	0.000316228	0.000147196	9.16573e-06	57.0843	0.0373641	11.032	0.0165066	0.174563	0.00584151	17.5661	0.0193357	0.0242101	0.00052237	57.2666	0.0319224	11.0253	0.0160197	0.28254	0.00573828	17.6593	0.0180619	0.027568	0.000503611	0.657935	0.0194174	0.0289884	0.00239744	0.00413504	0.00109333	0.0053733	0.00690201	0.00333683	0.000138674
pX	01H	ok	5	34.1321	0.21052	0.0949197	0.00101563	14.2267	2.90302	82.1249	85.8962	4.96288	0.0308962	0.0138868	2.13e-16	0.173081	0.000490754	0.000477223	1.59938e-05	33.0582	0.0347728	5.74256	0.0150458	0.103809	0.00545999	9.378	0.0173024	0.0242175	0.000528072	33.2433	0.0285337	5.73737	0.0147282	0.204999	0.0053494	9.49416	0.0158661	0.027554	0.000508429	0.65981	0.019874	0.0289884	0.00239744	0.00413504	0.00109333	0.0053733	0.00690201	0.00332645	0.000142654
pX	01I	ok	5.5	33.7	0.123289	0.0911533	0.000943816	21.6503	3.87058	86.1	89.2549	4.89946	0.0180898	0.0256935	2.13e-16	0.182177	0.000287143	0.000363553	1.00181e-05	58.1106	0.038421	10.6267	0.0150925	0.173923	0.0058138	18.0652	0.018331	0.0373881	0.000581246	58.2809	0.0324995	10.6057	0.0145823	0.277152	0.00571007	18.1454	0.016982	0.0407195	0.000561894	0.661717	0.0204928	0.0289884	0.00239744	0.00413504	0.00109333	0.0053733	0.00690201	0.0033159	0.000147734
pX	01J	ok	6	33.7688	0.136502	0.0889189	0.000924539	17.898	2.82743	89.5516	91.3154	4.90956	0.0200292	0.0223091	2.13e-16	0.186	0.000334707	0.000293821	1.12542e-05	49.4192	0.0384382	9.2279	0.0148708	0.156437	0.00539421	16.0771	0.0186189	0.0289957	0.000555381	49.5765	0.0320329	9.21433	0.0144059	0.260363	0.00528225	16.1739	0.0172923	0.0323159	0.000533607	0.663606	0.021246	0.0289884	0.00239744	0.00413504	0.00109333	0.0053733	0.00690201	0.00330545	0.000153691
pX	01K	ok	6.5	33.6286	0.239996	0.0881013	0.000977926	41.5953	34.5862	91.0676	91.8882	4.88898	0.0352125	0.00979874	2.13e-16	0.187954	0.000734861	0.000274437	1.86819e-05	21.4805	0.0349087	4.0533	0.0143423	0.0600876	0.00537529	7.12581	0.0180065	0.0123111	0.000400729	21.6462	0.0269895	4.04146	0.0140418	0.172835	0.00526293	7.25735	0.0166312	0.015611	0.000367241	0.665526	0.0221401	0.0289884	0.00239744	0.00413504	0.00109333	0.0053733	0.00690201	0.00329483	0.000160586
pX	01L	ok	15	33.6504	0.0678849	0.090321	0.000925707	17.9215	1.11471	100	93.8933	4.89218	0.00996028	0.057735	2.13e-16	0.19193	0.000170044	0.000206578	5.80124e-06	123.943	0.0414099	23.8798	0.0193211	0.402149	0.00543939	40.9472	0.020273	0.0624841	0.000716698	124.121	0.0343364	23.827	0.0176484	0.513571	0.00532837	41.0508	0.0190619	0.0657997	0.000695828	0.667443	0.0231472	0.0289884	0.00239744	0.00413504	0.00109333	0.0053733	0.00690201	0.00328422	0.000168211
Integrated K/Ca ±2σ						0.0959771	0.00195985	SD
Plateau Age ±2σ				33.8343	0.0610594	n=4/12	MSWD = 0.59	steps C-F
Total Integrated Age ±2σ				33.9233	0.0594445									K2O wt. %=0.65
Isochron Age ±2σ				33.7584	0.0614275		MSWD = 1.29
(40Ar/36Ar)trapped ±2σ				299.363	2.33748
	Sample:	18L-04			Identifier:	66903
	Material:	Sanidine
	Weight:
	01B	ok	3	33.2126	0.0139057	81.9927	5.38348	-1188.67	1841.22	5.94716	97.8408	12.1867	0.00514888		8e-17	0.0802857	2.77633e-05	7.30351e-05	7.90815e-07	1088.66	0.113012	87.3602	0.0288104	1.06769	0.00619714	0.140282	0.00883207	0.0796561	0.000860809	1090.04	0.0528255	87.1225	0.0188826	1.14448	0.0029438	0.102131	0.00606145	0.0856979	0.000770558	1.32459	0.0999063	0.0245869	0.0190039	0.0077418	0.00545331	0.0316736	0.00642373	0.00578457	0.000382733
	02B	ok	3	33.2385	0.00989268	79.3666	3.63767	-827.296	728.266	14.4513	99.5548	12.1963	0.00366302		8e-17	0.0816278	2.28885e-05	1.50318e-05	3.60579e-07	1531.14	0.126382	124.921	0.0334654	1.50668	0.00627441	0.207004	0.00896183	0.0232315	0.00055199	1532.52	0.0774028	124.603	0.0238109	1.58718	0.00310317	0.183085	0.00624901	0.0292737	0.000398059	1.31732	0.0999063	0.0245869	0.0190039	0.0077418	0.00545331	0.0316736	0.00642373	0.0057595	0.000382733
	03B	ok	3	33.239	0.0063043	79.9885	2.01716	-411.13	142.134	31.5675	99.7709	12.1965	0.00233433		8e-17	0.0818038	1.48795e-05	7.71689e-06	2.00268e-07	3075.07	0.150846	251.427	0.0440065	3.00771	0.00634627	0.413312	0.00908867	0.0241585	0.000615732	3076.5	0.113018	250.916	0.0302269	3.10433	0.00324602	0.383461	0.00642959	0.0304479	0.000482666	1.30616	0.0999063	0.0245869	0.0190039	0.0077418	0.00545331	0.0316736	0.00642373	0.00572112	0.000382733
X	04B	outlier	3	33.2867	0.0341022	69.7405	12.0044	-141.385	70.2191	33.4486	99.3316	12.2142	0.0126275		8e-17	0.0813258	7.63337e-05	2.25836e-05	1.45106e-06	339.939	0.10537	27.6319	0.0244796	0.322952	0.00631698	0.0519112	0.00871449	0.00773008	0.000493161	341.275	0.0334911	27.5034	0.0151011	0.402185	0.00318838	0.0180836	0.00588881	0.0135028	0.000311472	1.29899	0.0999063	0.0245869	0.0190039	0.0077418	0.00545331	0.0316736	0.00642373	0.00569654	0.000382733
X	05B	outlier	3	33.3049	0.0176462	47.0448	2.72193	-790.129	1111.54	37.3487	99.7381	12.2209	0.00653419		8e-17	0.0816135	4.0032e-05	8.82709e-06	7.16886e-07	702.312	0.110199	57.2896	0.0266212	0.689983	0.00616085	0.15833	0.00886708	0.0063667	0.000503369	703.66	0.0465042	57.1143	0.0175235	0.759648	0.00286661	0.127398	0.00611235	0.0121752	0.000327422	1.29185	0.0999063	0.0245869	0.0190039	0.0077418	0.00545331	0.0316736	0.00642373	0.00567214	0.000382733
X	06B	outlier	3	33.2623	0.0129194	82.0914	8.73306	527.102	452.226	42.6787	99.6744	12.2051	0.00478379		8e-17	0.0816669	2.92742e-05	1.09815e-05	5.333e-07	959.197	0.11425	78.2949	0.0264654	0.959813	0.00753578	0.122849	0.012649	0.010666	0.000511331	960.134	0.0554243	78.068	0.0152279	1.0301	0.00520091	0.095897	0.0108965	0.0153635	0.000339521	0.888074	0.0999063	0.0245869	0.0190039	0.0077418	0.00545331	0.0316736	0.00642373	0.00449485	0.000382733
	08B	ok	3	33.1688	0.0190755	128.138	26.4648	-225.609	113.356	46.3057	99.6523	12.1705	0.00706293		8e-17	0.081881	4.41251e-05	1.17307e-05	7.24237e-07	651.003	0.109902	53.2775	0.027263	0.630701	0.00744339	0.054164	0.0107083	0.00769208	0.000471314	651.89	0.0457938	53.1135	0.0185025	0.705048	0.00506611	0.0378652	0.00856763	0.0122615	0.000275531	0.852578	0.0999066	0.0245869	0.0190039	0.0077418	0.00545331	0.0316736	0.00642373	0.00444755	0.000382733
X	09B	outlier	3	33.2663	0.0160561	78.7301	9.44387	-1131.11	2463.43	50.6556	97.5874	12.2066	0.00594527		8e-17	0.0799471	3.31441e-05	8.16096e-05	8.26468e-07	799.642	0.111056	63.8965	0.0249555	0.782086	0.00755059	0.104037	0.0121072	0.0653693	0.000660658	800.531	0.0484993	63.694	0.0146045	0.860506	0.00522235	0.0653603	0.0102625	0.0700197	0.000537961	0.850961	0.0999066	0.0245869	0.0190039	0.0077418	0.00545331	0.0316736	0.00642373	0.00444627	0.000382733
	10B	ok	3	33.2205	0.00810957	56.6244	1.98051	7201.35	50960	63.0427	99.1507	12.1896	0.00300274		8e-17	0.081341	1.81621e-05	2.87075e-05	3.44618e-07	2238.11	0.135621	181.957	0.0390846	2.21682	0.00768798	0.408891	0.013359	0.0646931	0.00077111	2239.04	0.0917157	181.528	0.0286438	2.30023	0.00541908	0.376192	0.0117131	0.0696116	0.000669153	0.849376	0.0999066	0.0245869	0.0190039	0.0077418	0.00545331	0.0316736	0.00642373	0.00444512	0.000382733
	11B	ok	3	33.2245	0.0214086	63.7478	4.93836	2519.32	10568.6	68.2503	89.9875	12.1911	0.00792703		8e-17	0.0738145	2.77524e-05	0.000338805	1.50215e-06	1036.86	0.113524	76.4962	0.0275099	0.994111	0.00757201	0.153019	0.0114924	0.351455	0.00155693	1037.75	0.0539109	76.2927	0.0182686	1.06621	0.00525326	0.115215	0.00952943	0.356342	0.00149927	0.847814	0.0999066	0.0245869	0.0190039	0.0077418	0.00545331	0.0316736	0.00642373	0.00444409	0.000382733
	12B	ok	3	33.2385	0.0265641	58.1567	8.04466	372.383	389.432	71.0803	95.9296	12.1963	0.00983604		8e-17	0.0786553	5.09963e-05	0.000137714	1.52709e-06	528.788	0.108514	41.5709	0.025565	0.524433	0.00749556	0.0909673	0.0123064	0.0729201	0.000807229	529.671	0.0423554	41.4326	0.0164773	0.59139	0.00514245	0.0594176	0.0104969	0.0775035	0.000710313	0.846258	0.0999066	0.0245869	0.0190039	0.0077418	0.00545331	0.0316736	0.00642373	0.00444317	0.000382733
	13B	ok	3	33.221	0.0214889	68.6736	9.46267	309.411	234.934	74.4528	97.9091	12.1898	0.00795673		8e-17	0.0803211	4.46259e-05	7.07244e-05	1.12216e-06	617.077	0.109383	49.5391	0.0260828	0.618657	0.00771231	0.0920888	0.0123657	0.0437427	0.000692258	617.95	0.0445335	49.3796	0.0168494	0.686463	0.00545355	0.0584692	0.0105662	0.0483522	0.000576918	0.843712	0.0999067	0.0245869	0.0190039	0.0077418	0.00545331	0.0316736	0.00642373	0.00444192	0.000382733
X	14B	outlier	3	33.3109	0.013912	91.9054	10.182	-10091.7	171914	79.643	99.7583	12.2231	0.00515147		8e-17	0.0816152	3.20942e-05	8.14273e-06	5.107e-07	934.63	0.114038	76.2411	0.0284963	0.92398	0.00768187	0.106682	0.0114053	0.00772472	0.000477131	935.514	0.0549842	76.0395	0.018853	0.994651	0.00541041	0.0855615	0.00942428	0.0124203	0.000285379	0.84226	0.0999067	0.0245869	0.0190039	0.0077418	0.00545331	0.0316736	0.00642373	0.00444135	0.000382733
	15B	ok	3	33.2195	0.0220863	110.113	25.5034	-451.972	531.157	82.6303	99.823	12.1893	0.00817795		8e-17	0.081895	5.10401e-05	5.95325e-06	8.3784e-07	536.085	0.107212	43.8802	0.0258996	0.525377	0.00727932	0.0515398	0.011499	0.00324561	0.000448957	536.959	0.0388976	43.7326	0.0164341	0.598514	0.00482182	0.0208009	0.00953745	0.00783613	0.000235223	0.840811	0.0999067	0.0245869	0.0190039	0.0077418	0.00545331	0.0316736	0.00642373	0.00444089	0.000382733
	16B	ok	3	33.2161	0.0397951	52.4888	11.8027	793.38	2995.95	84.2366	98.3986	12.188	0.014735		8e-17	0.0807348	8.77109e-05	5.41574e-05	1.75063e-06	292.409	0.103455	23.5956	0.0242361	0.290646	0.00739049	0.0570465	0.0125927	0.0158982	0.000511662	293.276	0.0268623	23.4896	0.0146144	0.364064	0.00498806	0.0303268	0.010831	0.020425	0.000339966	0.838608	0.0999067	0.0245869	0.0190039	0.0077418	0.00545331	0.0316736	0.00642373	0.00444044	0.000382733
X	17B	outlier	3	33.285	0.0199426	59.6833	6.34979	5360.96	57861.9	88.1573	98.1381	12.2135	0.00738446		8e-17	0.0803529	4.12728e-05	6.29738e-05	1.04767e-06	717.107	0.125376	57.5923	0.0278126	0.706494	0.00716757	0.12272	0.0127356	0.0452917	0.00075109	717.981	0.0757481	57.4248	0.0191611	0.780322	0.00465141	0.083397	0.0109969	0.0498853	0.00064639	0.837252	0.0999068	0.0245869	0.0190039	0.0077418	0.00545331	0.0316736	0.00642373	0.0044403	0.000382733
	18B	ok	3	33.1943	0.0166113	60.9778	6.19999	1704.22	5571.5	92.3897	99.3638	12.18	0.00615063		8e-17	0.0815806	3.7908e-05	2.14936e-05	6.61361e-07	762.465	0.109638	62.1707	0.0274673	0.758243	0.00731315	0.129694	0.0128507	0.0165288	0.000504041	763.344	0.0451556	62.0089	0.0187383	0.831691	0.00487274	0.096209	0.01113	0.0211094	0.000328361	0.835888	0.0999068	0.0245869	0.0190039	0.0077418	0.00545331	0.0316736	0.00642373	0.0044403	0.000382733
X	19B	outlier	3	33.3825	0.0179194	86.6786	14.5549	1854.23	8316.85	95.9968	99.5929	12.2497	0.00663564		8e-17	0.0813035	4.01297e-05	1.37409e-05	7.50032e-07	652.038	0.10798	52.9859	0.0246339	0.645094	0.00812147	0.0783977	0.0127652	0.00904403	0.000488826	652.916	0.0409665	52.8328	0.0145386	0.717849	0.00601828	0.0525388	0.0110312	0.0136428	0.000304543	0.834554	0.0999068	0.0245869	0.0190039	0.0077418	0.00545331	0.0316736	0.00642373	0.00444041	0.000382733
X	20B	outlier	3	33.2904	0.0165175	65.6689	6.91321	-260.417	138.428	100	99.8767	12.2155	0.00611619		8e-17	0.0817629	3.80312e-05	4.13815e-06	6.25533e-07	719.569	0.111979	58.804	0.0257725	0.697465	0.00743828	0.113971	0.0116778	0.00309936	0.000449912	720.434	0.0505747	58.6551	0.0162867	0.770892	0.00505861	0.0832701	0.00975231	0.00767083	0.000237043	0.829277	0.0999069	0.0245869	0.0190039	0.0077418	0.00545331	0.0316736	0.00642373	0.00444229	0.000382733
Weighted mean K/Ca ±2σ						69.2954	7.36033	SE but if MSWD>1 use SE * sqrt(MSWD)
Weighted mean Age ±2σ				33.2262	0.064916	n=11/19	MSWD = 2.03
Isochron Age ±2σ				33.227	0.0640167		MSWD = *2.23
(40Ar/36Ar)trapped ±2σ				294.802	3.31568
	Sample:	18L-03			Identifier:	66904
	Material:	Sanidine
	Weight:
X	01A	outlier	0.5	29.1665	5.4691	3.76594	6.64201	-2.60423	4.47937	0.00403144	87.9298	10.5703	1.99791		8e-17	0.0831865	0.0137267	0.000408434	0.000259135	1.74323	0.100382	0.144953	0.0224128	-0.00182039	0.00637719	0.0049317	0.00865267	0.000716858	0.000449755	3.04815	0.00975885	0.0673551	0.0118097	0.0704492	0.00330605	-0.0332936	0.00579692	0.00637962	0.00023675	1.28499	0.0999063	0.0245869	0.0190039	0.0077418	0.00545331	0.0316736	0.00642373	0.00564874	0.000382733
X	01B	outlier	3	33.6831	0.216187	72.8355	90.152	-56.1285	73.7215	0.115969	99.0834	12.2223	0.0791703		8e-17	0.0810685	0.000475483	3.09836e-05	9.16945e-06	49.6674	0.101155	4.02445	0.022135	0.0442312	0.00627271	0.00724197	0.00875087	0.00154592	0.000455299	50.9555	0.0158433	3.92469	0.0112648	0.109304	0.00309973	-0.0343466	0.00594251	0.00720728	0.000247132	1.28143	0.0999063	0.0245869	0.0190039	0.0077418	0.00545331	0.0316736	0.00642373	0.00563664	0.000382733
X	02A	outlier	0.5	34.6344	2.49168	0	0	-20.3086	108.278	0.126119	96.4033	12.5708	0.912955		8e-17	0.0766892	0.00509811	0.000121682	9.35126e-05	4.76089	0.100521	0.364919	0.0230029	0.00332794	0.00638616	-0.00193824	0.00882574	0.00057917	0.00044502	6.05926	0.011104	0.272535	0.012891	0.0725313	0.00332333	-0.0340149	0.00605222	0.00622794	0.000227615	1.27791	0.0999063	0.0245869	0.0190039	0.0077418	0.00545331	0.0316736	0.00642373	0.00562466	0.000382733
X	02B	outlier	3	33.7848	0.27082	33.14	24.1431	-27.0241	21.0854	0.217121	98.8647	12.2596	0.0991827		8e-17	0.0806437	0.000594718	3.8386e-05	1.10557e-05	40.5905	0.101047	3.27174	0.0227111	0.0318337	0.00629367	0.0127691	0.00919945	0.00157076	0.000448615	41.8783	0.0151405	3.18409	0.0123568	0.101617	0.00314194	-0.02952	0.00658525	0.00720487	0.000234574	1.2744	0.0999063	0.0245869	0.0190039	0.0077418	0.00545331	0.0316736	0.00642373	0.00561276	0.000382733
X	03A	outlier	0.5	35.3407	4.94613	0	0	-6.31978	20.2282	0.222224	89.5551	12.8296	1.81297		8e-17	0.069804	0.00895529	0.000353437	0.000170601	2.63006	0.10045	0.183492	0.0224734	0.000459164	0.00619792	-0.00128817	0.00899805	0.000929323	0.000447269	3.90987	0.010436	0.103583	0.0119225	0.0771457	0.00294545	-0.027312	0.00630084	0.00652839	0.000231987	1.26818	0.0999063	0.0245869	0.0190039	0.0077418	0.00545331	0.0316736	0.00642373	0.00559169	0.000382733
X	03B	outlier	3	33.7935	0.110888	54.6344	23.4592	-68.3474	53.0402	0.453749	99.8346	12.2628	0.040611		8e-17	0.0814137	0.000247193	5.56137e-06	4.46269e-06	102.293	0.101953	8.32391	0.0238725	0.0927663	0.00628356	0.0198383	0.00836313	0.000588944	0.000456398	103.574	0.0203268	8.22084	0.0143443	0.169955	0.00312164	-0.0108906	0.00535515	0.00618966	0.000249154	1.26472	0.0999063	0.0245869	0.0190039	0.0077418	0.00545331	0.0316736	0.00642373	0.00557998	0.000382733
X	04A	outlier	0.5	17.4381	15.2906	0	0	0.43765	0.521143	0.454849	56.0291	6.29955	5.55011		8e-17	0.0889425	0.0550652	0.001488	0.0010608	0.445078	0.1004	0.0395356	0.0228117	0.00663332	0.00612092	-0.0110958	0.00884735	0.000662974	0.000447863	1.73007	0.00994734	-0.0358467	0.0125435	0.0697199	0.00277977	-0.0336424	0.0060837	0.00624528	0.000233132	1.26127	0.0999063	0.0245869	0.0190039	0.0077418	0.00545331	0.0316736	0.00642373	0.00556831	0.000382733
X	04B	outlier	3	33.9044	1.37199	0	0	-27.5562	110.378	0.472859	88.5851	12.3034	0.502498		8e-17	0.0720013	0.00263199	0.000386263	5.18856e-05	8.99711	0.100506	0.647473	0.0225358	0.00692315	0.00627296	-0.00123981	0.00899426	0.00347504	0.000465188	10.2467	0.010959	0.550489	0.0120348	0.0736254	0.00310024	-0.0325332	0.00629543	0.00904426	0.000264927	1.25787	0.0999063	0.0245869	0.0190039	0.0077418	0.00545331	0.0316736	0.00642373	0.00555685	0.000382733
X	05A	outlier	0.5	27.7399	9.32147	0	0	-0.680245	0.537269	0.475177	67.5693	10.0494	3.40256		8e-17	0.0672378	0.0192071	0.00109746	0.000373965	1.24019	0.100343	0.0833178	0.0228333	-0.00690792	0.00614806	-0.0101488	0.00855645	0.0013601	0.000450511	2.49351	0.00935028	-0.00603154	0.0125797	0.0633555	0.00283904	-0.037371	0.00565231	0.0069198	0.000238184	1.25443	0.0999063	0.0245869	0.0190039	0.0077418	0.00545331	0.0316736	0.00642373	0.00554528	0.000382733
X	05B	outlier	3	34.317	0.422974	36.546	43.776	-41.8789	78.1661	0.533158	98.5059	12.4545	0.154952		8e-17	0.0790935	0.000900827	5.05275e-05	1.65399e-05	26.3689	0.100693	2.08458	0.0223673	0.0221709	0.00619071	0.00737933	0.0087321	0.00133982	0.000435993	27.6249	0.0125658	2.01347	0.0117126	0.0928018	0.00293025	-0.0284303	0.00591483	0.00689152	0.000209393	1.25104	0.0999063	0.0245869	0.0190039	0.0077418	0.00545331	0.0316736	0.00642373	0.00553389	0.000382733
X	06A	outlier	0.5	37.6686	0.016832	71.2468	3.69901	576.378	394.32	4.22962	92.5878	13.6834	0.00617752		8e-17	0.0676647	1.85671e-05	0.00025081	1.0367e-06	1965.04	0.12923	132.897	0.035396	1.71686	0.00813303	0.243075	0.0120457	0.493105	0.00203679	1966.23	0.0819705	132.621	0.0251647	1.79216	0.00603388	0.208244	0.01019	0.499051	0.00198563	1.14983	0.0999063	0.0245869	0.0190039	0.0077418	0.00545331	0.0316736	0.00642373	0.00520198	0.000382733
X	06B	outlier	3	33.5387	0.0130522	62.4769	4.40878	-389.756	226.335	6.58847	99.4266	12.1694	0.00477949		8e-17	0.0817027	2.94635e-05	1.937e-05	5.20809e-07	1038.51	0.113847	84.8065	0.0291296	1.01605	0.00727214	0.176368	0.0120468	0.0203012	0.000540684	1039.7	0.0545885	84.6115	0.0194372	1.0975	0.00481098	0.13628	0.0101913	0.0257104	0.00038225	1.14775	0.0999063	0.0245869	0.0190039	0.0077418	0.00545331	0.0316736	0.00642373	0.00519535	0.000382733
X	07A	outlier	0.5	36.6885	0.0155932	68.0276	5.65454	268.777	127.356	8.6993	98.3371	13.3238	0.00571977		8e-17	0.073806	2.77699e-05	5.62431e-05	6.77799e-07	1028.75	0.112882	75.8898	0.0273086	0.948511	0.00806633	0.145196	0.0116982	0.0580155	0.000697118	1029.93	0.0525467	75.7097	0.0171369	1.02666	0.00594366	0.113401	0.00977664	0.0634417	0.000582416	1.14562	0.0999063	0.0245869	0.0190039	0.0077418	0.00545331	0.0316736	0.00642373	0.00518857	0.000382733
X	07B	outlier	3	32.9587	0.0116041	77.8643	5.70426	-1415.98	2772.88	11.6204	99.0965	11.9571	0.00424787		8e-17	0.0828776	2.69434e-05	3.0539e-05	4.75404e-07	1267.83	0.124872	105.021	0.0325296	1.27383	0.00812861	0.176094	0.0124267	0.0389031	0.000602544	1269.01	0.0749121	104.812	0.0227517	1.35231	0.00602791	0.148149	0.0106376	0.0443512	0.000465438	1.14347	0.0999063	0.0245869	0.0190039	0.0077418	0.00545331	0.0316736	0.00642373	0.00518177	0.000382733
X	08A	outlier	0.5	35.0053	0.0143272	40.0353	1.4636	111.551	17.2097	14.3072	94.6944	12.7067	0.00525059		8e-17	0.074524	2.22705e-05	0.000179514	8.57191e-07	1296.85	0.116035	96.5984	0.0275363	1.27107	0.0074648	0.311114	0.0107531	0.23314	0.00111135	1298.05	0.059015	96.4071	0.015489	1.35404	0.00509752	0.293374	0.00862345	0.238714	0.00103718	1.14127	0.0999063	0.0245869	0.0190039	0.0077418	0.00545331	0.0316736	0.00642373	0.00517479	0.000382733
X	08B	outlier	3	33.3481	0.0121807	61.1833	3.12923	531.999	399.675	17.3571	97.5848	12.0996	0.00445989		8e-17	0.0806518	2.45518e-05	8.16983e-05	6.69143e-07	1360.25	0.118528	109.652	0.0319747	1.3622	0.00873962	0.232673	0.0113982	0.111378	0.000910036	1361.44	0.0637781	109.431	0.0212386	1.43537	0.00682952	0.208064	0.00941561	0.116907	0.000824278	1.13919	0.0999063	0.0245869	0.0190039	0.0077418	0.00545331	0.0316736	0.00642373	0.00516819	0.000382733
X	09A	outlier	0.5	35.0415	0.0206066	66.6306	2.75049	2178.54	5034.68	21.5602	84.7335	12.72	0.00755197		8e-17	0.0666151	1.69237e-05	0.000516609	1.26163e-06	2269.53	0.142726	151.11	0.0371857	2.05414	0.00752778	0.294927	0.0114847	1.17276	0.00286224	2270.74	0.101929	150.848	0.0246769	2.13906	0.00518931	0.267605	0.00952015	1.17914	0.00277327	1.13712	0.0999063	0.0245869	0.0190039	0.0077418	0.00545331	0.0316736	0.00642373	0.00516165	0.000382733
X	09B	outlier	3	33.3504	0.00993323	81.4393	4.80142	-3574.89	14771.6	25.2818	98.9578	12.1005	0.003637		8e-17	0.0817808	2.1815e-05	3.52345e-05	4.58454e-07	1636.92	0.123507	133.801	0.0342221	1.62827	0.00783609	0.214671	0.0120945	0.0579016	0.000750296	1638.11	0.0726135	133.553	0.0217646	1.70689	0.00562723	0.190232	0.0102476	0.0634596	0.000645199	1.13503	0.0999063	0.0245869	0.0190039	0.0077418	0.00545331	0.0316736	0.00642373	0.00515504	0.000382733
X	10A	outlier	0.5	37.1549	0.0300245	50.5726	1.49326	148.805	21.9207	29.9752	74.7029	13.495	0.0110162		8e-17	0.0553566	1.30981e-05	0.000856059	1.33816e-06	3049.73	0.161069	168.739	0.0389106	2.60851	0.00719602	0.431555	0.0116908	2.6112	0.00407855	3050.96	0.126341	168.459	0.0244524	2.68826	0.00469511	0.396592	0.00976787	2.61861	0.00383382	1.13294	0.0999063	0.0245869	0.0190039	0.0077418	0.00545331	0.0316736	0.00642373	0.00514846	0.000382733
X	10B	outlier	3	33.3133	0.00708938	60.7278	1.62865	2591.71	5959.51	36.6425	99.6464	12.0869	0.00259569		8e-17	0.0824426	1.68553e-05	1.19302e-05	2.20085e-07	2909.02	0.155598	239.707	0.0472737	2.91493	0.0075533	0.512193	0.0123211	0.0352499	0.00064006	2910.25	0.119288	239.351	0.0266918	2.99851	0.00522626	0.482467	0.010514	0.0409868	0.000513206	1.13091	0.0999063	0.0245869	0.0190039	0.0077418	0.00545331	0.0316736	0.00642373	0.00514207	0.000382733
	11A	ok	0.5	33.2531	0.0189857	40.7654	3.12746	105.362	24.2041	38.1625	99.1421	12.0649	0.00695115		8e-17	0.0821751	4.26115e-05	2.89951e-05	8.37777e-07	665.368	0.109174	54.649	0.0268789	0.699922	0.0074499	0.169221	0.0126878	0.0194813	0.000557224	666.226	0.0440179	54.5017	0.018032	0.776943	0.00507568	0.135922	0.0109415	0.0241042	0.000405347	0.828683	0.099907	0.0245869	0.0190039	0.0077418	0.00545331	0.0316736	0.00642373	0.00444266	0.000382733
	11B	ok	3	33.2578	0.0109483	72.6424	4.64366	1747.69	3894.72	41.1834	99.1648	12.0666	0.00400847		8e-17	0.0821821	2.48877e-05	2.82294e-05	4.53825e-07	1322.2	0.122748	108.606	0.0312976	1.32608	0.00745901	0.190684	0.0117217	0.0375313	0.000599876	1323.08	0.0713132	108.394	0.0214808	1.40129	0.00508903	0.161187	0.00980476	0.042278	0.000462004	0.828097	0.099907	0.0245869	0.0190039	0.0077418	0.00545331	0.0316736	0.00642373	0.00444306	0.000382733
X	12A	outlier	0.5	38.2502	0.0187154	77.7062	6.99578	680.033	716.237	43.649	94.0679	13.8969	0.00687091		8e-17	0.0676902	2.50837e-05	0.00020072	9.79028e-07	1310.23	0.125145	88.6445	0.0317347	1.13128	0.00799858	0.14572	0.0126887	0.263145	0.00128239	1311.11	0.0753647	88.4608	0.0228389	1.20655	0.00585139	0.117872	0.0109426	0.268029	0.00121726	0.827503	0.099907	0.0245869	0.0190039	0.0077418	0.00545331	0.0316736	0.00642373	0.0044435	0.000382733
X	12B	outlier	3	33.3644	0.0117217	79.4295	6.40489	647.012	605.414	46.2115	99.4782	12.1056	0.00429186		8e-17	0.0821762	2.65892e-05	1.76236e-05	4.85496e-07	1121.68	0.118248	92.1279	0.0281756	1.12862	0.00758922	0.14823	0.011531	0.0199288	0.000544395	1122.55	0.0632546	91.9396	0.0165324	1.19882	0.00527804	0.113331	0.00957603	0.0245966	0.000387493	0.826916	0.099907	0.0245869	0.0190039	0.0077418	0.00545331	0.0316736	0.00642373	0.00444398	0.000382733
X	13A	outlier	0.5	36.4309	0.0241244	61.2172	7.79636	298.77	214.793	47.5129	98.072	13.2293	0.0088479		8e-17	0.0741329	4.34913e-05	6.52146e-05	1.05397e-06	631.459	0.107637	46.7881	0.0262629	0.584662	0.00712632	0.0970793	0.0120725	0.0412866	0.000665345	632.313	0.0400545	46.6785	0.016762	0.654619	0.00458758	0.0630753	0.0102215	0.0458646	0.00054434	0.825735	0.099907	0.0245869	0.0190039	0.0077418	0.00545331	0.0316736	0.00642373	0.00444506	0.000382733
X	13B	outlier	3	33.3387	0.0243723	57.3824	7.13277	288.225	235.387	48.7019	98.8168	12.0962	0.00892372		8e-17	0.0816933	5.36418e-05	4.00038e-05	1.11711e-06	523.514	0.109483	42.7458	0.0266043	0.531373	0.0077823	0.0944919	0.0114818	0.0210463	0.000584647	524.367	0.0447783	42.6278	0.0175844	0.60276	0.00555208	0.066603	0.00951671	0.0256222	0.000442315	0.825186	0.0999071	0.0245869	0.0190039	0.0077418	0.00545331	0.0316736	0.00642373	0.00444561	0.000382733
X	14A	outlier	0.5	35.604	0.00773221	70.8593	2.00791	1213.93	1252.36	56.5796	97.3761	12.9262	0.0028346		8e-17	0.0753334	1.38901e-05	8.87619e-05	3.59212e-07	3761.52	0.183425	283.223	0.0503321	3.50729	0.00751764	0.509192	0.0129856	0.334429	0.00135096	3762.44	0.153829	282.764	0.0268231	3.58885	0.00517459	0.481723	0.0112854	0.339802	0.00128499	0.824645	0.0999071	0.0245869	0.0190039	0.0077418	0.00545331	0.0316736	0.00642373	0.0044462	0.000382733
X	14B	outlier	3	33.4406	0.00957079	72.1331	3.18204	9189.14	91559.5	60.8448	99.3203	12.1335	0.00350447		8e-17	0.0818572	2.19635e-05	2.29653e-05	3.56195e-07	1874.23	0.120593	153.341	0.0399299	1.86574	0.00799283	0.270902	0.0112976	0.0433351	0.000667442	1875.14	0.0675376	153.062	0.0288931	1.94635	0.00584353	0.241589	0.0092936	0.0481808	0.000546863	0.824113	0.0999071	0.0245869	0.0190039	0.0077418	0.00545331	0.0316736	0.00642373	0.00444682	0.000382733
X	15A	outlier	0.5	34.891	0.0275916	74.5559	12.5212	163.472	75.3144	62.0452	96.7922	12.6648	0.010111		8e-17	0.0764268	5.18364e-05	0.000108523	1.35779e-06	564.989	0.106102	43.1583	0.0281259	0.551644	0.00781014	0.0738098	0.0120688	0.0613954	0.000766908	565.843	0.0357252	43.03	0.020038	0.622251	0.00559104	0.0519666	0.0102173	0.0660124	0.000664383	0.822826	0.0999071	0.0245869	0.0190039	0.0077418	0.00545331	0.0316736	0.00642373	0.00444847	0.000382733
X	15B	outlier	3	33.3969	0.0177147	72.8453	9.13909	1291.2	3330.86	63.6849	99.3466	12.1175	0.00648631		8e-17	0.0819869	3.97472e-05	2.20776e-05	7.59486e-07	719.382	0.112583	58.9498	0.0270455	0.71975	0.00727252	0.103117	0.012581	0.015994	0.000546157	720.238	0.0518991	58.8028	0.0179623	0.793801	0.00481156	0.0728933	0.0108174	0.0206187	0.000390016	0.822318	0.0999071	0.0245869	0.0190039	0.0077418	0.00545331	0.0316736	0.00642373	0.00444919	0.000382733
X	16A	outlier	0.5	37.4283	0.0194691	76.4893	4.64443	248.08	74.4923	67.0154	87.1964	13.5953	0.0071444		8e-17	0.0641379	1.72482e-05	0.00043326	1.10655e-06	1867.87	0.132615	119.74	0.031052	1.63376	0.00756431	0.199693	0.0116227	0.809487	0.002066	1868.75	0.0872078	119.507	0.0206014	1.71231	0.00524216	0.172485	0.00968627	0.814838	0.00198827	0.8218	0.0999072	0.0245869	0.0190039	0.0077418	0.00545331	0.0316736	0.00642373	0.00444996	0.000382733
X	16B	outlier	3	33.4869	0.0143224	61.9723	5.5155	-573.171	571.412	69.0821	99.2271	12.1505	0.00524446		8e-17	0.0816661	3.23026e-05	2.61191e-05	5.75763e-07	910.289	0.116969	74.3018	0.027791	0.895427	0.00776904	0.152206	0.0131732	0.02394	0.000523879	911.154	0.0608295	74.1365	0.0185811	0.972095	0.00553349	0.118874	0.0115008	0.0285865	0.000357993	0.821303	0.0999072	0.0245869	0.0190039	0.0077418	0.00545331	0.0316736	0.00642373	0.00445075	0.000382733
X	17A	outlier	0.5	55.7876	0.0285642	69.9489	7.61636	93.3031	19.4006	70.6814	96.6783	20.3663	0.0105876		8e-17	0.04747	2.15574e-05	0.000112391	8.01229e-07	1211.91	0.118514	57.5	0.0254985	0.762836	0.00803484	0.104618	0.0110747	0.136324	0.000970817	1212.77	0.0637507	57.3596	0.0158461	0.844273	0.00590086	0.0774481	0.00902135	0.141178	0.000890088	0.820807	0.0999072	0.0245869	0.0190039	0.0077418	0.00545331	0.0316736	0.00642373	0.00445157	0.000382733
X	17B	outlier	3	33.4651	0.0198022	100.397	16.5476	-263.569	156.387	72.1923	98.7481	12.1425	0.00725092		8e-17	0.0813252	4.36284e-05	4.23307e-05	8.68782e-07	668.244	0.112573	54.3172	0.0276628	0.64918	0.00768153	0.0695314	0.0110609	0.0283599	0.000580388	669.106	0.0518766	54.1853	0.0192684	0.723216	0.00540993	0.0435501	0.00900437	0.0329982	0.000436553	0.82032	0.0999072	0.0245869	0.0190039	0.0077418	0.00545331	0.0316736	0.00642373	0.00445243	0.000382733
X	18A	outlier	0.5	34.439	0.0197357	73.7118	8.90204	755.518	1147.31	73.7396	97.1601	12.4992	0.00723041		8e-17	0.0777339	3.78228e-05	9.60728e-05	1.00825e-06	716.007	0.110095	55.6296	0.0256778	0.691343	0.00691059	0.0961472	0.0112852	0.0688929	0.000721704	716.866	0.0462531	55.4946	0.0162956	0.764781	0.00424473	0.0674405	0.00927851	0.0735577	0.000611367	0.819827	0.0999072	0.0245869	0.0190039	0.0077418	0.00545331	0.0316736	0.00642373	0.00445333	0.000382733
X	18B	outlier	3	33.4753	0.0284301	56.9512	9.65546	824.68	2333.6	74.6501	99.482	12.1462	0.0104102		8e-17	0.0819045	6.40431e-05	1.74955e-05	1.17742e-06	399.896	0.105334	32.7366	0.0241	0.400325	0.00730443	0.0728254	0.0120923	0.0070759	0.000470635	400.744	0.0333729	32.6354	0.0144118	0.468877	0.00485964	0.0420568	0.010245	0.0116313	0.000274371	0.819346	0.0999073	0.0245869	0.0190039	0.0077418	0.00545331	0.0316736	0.00642373	0.00445427	0.000382733
X	19A	outlier	0.5	36.4519	0.0270649	47.4892	1.95962	62.1155	4.73952	77.843	79.5041	13.2371	0.00992647		8e-17	0.0600622	1.64364e-05	0.000693579	1.46064e-06	1912.14	0.132106	114.789	0.0303896	1.76195	0.00737261	0.305219	0.0119838	1.32656	0.00279131	1913.02	0.0864322	114.571	0.0209263	1.83733	0.00496154	0.266622	0.0101166	1.33228	0.00268094	0.818204	0.0999073	0.0245869	0.0190039	0.0077418	0.00545331	0.0316736	0.00642373	0.00445666	0.000382733
X	19B	outlier	3	33.5132	0.0152854	68.3224	6.17312	582.362	617.264	79.7743	99.3296	12.1601	0.00559717		8e-17	0.0816858	3.43374e-05	2.26518e-05	6.26922e-07	850.485	0.11235	69.4371	0.0277056	0.852271	0.00767191	0.129197	0.0113289	0.0194059	0.000533014	851.339	0.0513909	69.2878	0.0189617	0.92546	0.00539626	0.110311	0.00933169	0.0240565	0.00037132	0.817754	0.0999073	0.0245869	0.0190039	0.0077418	0.00545331	0.0316736	0.00642373	0.00445769	0.000382733
X	20A	outlier	0.5	36.8446	0.0178229	77.2567	9.09756	591.769	665.499	81.5731	97.8888	13.3811	0.00653822		8e-17	0.0731553	3.11108e-05	7.14132e-05	7.82836e-07	884.459	0.112522	64.6698	0.0262396	0.802114	0.00752353	0.106711	0.0121953	0.0632778	0.000692184	885.316	0.0517663	64.5127	0.0169138	0.874498	0.00518315	0.069447	0.0103664	0.0679648	0.000576347	0.817307	0.0999073	0.0245869	0.0190039	0.0077418	0.00545331	0.0316736	0.00642373	0.00445875	0.000382733
X	20B	outlier	3	33.4483	0.0154725	87.1015	10.3436	2525.68	11929.1	83.4533	99.7346	12.1363	0.00566547		8e-17	0.0821793	3.56822e-05	8.94521e-06	5.77234e-07	822.988	0.115496	67.598	0.0277716	0.821585	0.00771568	0.0992431	0.0113998	0.00746898	0.00047487	823.849	0.0579465	67.4503	0.0190767	0.892385	0.00545831	0.0784811	0.00941764	0.0121015	0.000281579	0.816877	0.0999074	0.0245869	0.0190039	0.0077418	0.00545331	0.0316736	0.00642373	0.00445982	0.000382733
X	21A	outlier	0.5	33.3438	0.0119918	57.0921	3.18364	1763.25	4262.09	86.1548	98.9962	12.0981	0.00439071		8e-17	0.0818291	2.58384e-05	3.39326e-05	5.94669e-07	1187.52	0.117858	97.1244	0.0291063	1.18719	0.00742352	0.215381	0.0115651	0.0405304	0.00070603	1188.38	0.062522	96.93	0.0195981	1.2604	0.00503687	0.19229	0.00961709	0.045278	0.000593455	0.815882	0.0999074	0.0245869	0.0190039	0.0077418	0.00545331	0.0316736	0.00642373	0.00446248	0.000382733
X	21B	outlier	3	33.3746	0.015241	51.2309	3.41982	8655.32	116758	88.4147	97.2005	12.1093	0.00558048		8e-17	0.0802698	2.92453e-05	9.47051e-05	9.09759e-07	1012.7	0.115694	81.2476	0.0281032	1.00235	0.0073935	0.200382	0.0129832	0.0961253	0.000921099	1013.57	0.05834	81.0722	0.0187869	1.07584	0.00499252	0.165969	0.0112827	0.100863	0.000836994	0.815461	0.0999074	0.0245869	0.0190039	0.0077418	0.00545331	0.0316736	0.00642373	0.00446369	0.000382733
	22A	ok	0.5	33.2791	0.0333536	68.2017	16.4819	-298.6	361.789	89.1947	99.4873	12.0744	0.0122118		8e-17	0.0823963	7.66934e-05	1.73132e-05	1.32718e-06	340.5	0.104362	28.0416	0.024644	0.334353	0.00745204	0.0522343	0.0123298	0.00595103	0.000451676	341.335	0.0301649	27.9395	0.0153347	0.406599	0.00507882	0.0166472	0.0105242	0.0105113	0.000240365	0.815053	0.0999075	0.0245869	0.0190039	0.0077418	0.00545331	0.0316736	0.00642373	0.00446491	0.000382733
	22B	ok	3	33.2325	0.0370843	195.82	146.283	-13621	813247	89.8706	99.1065	12.0573	0.0135774		8e-17	0.082197	8.39624e-05	3.02011e-05	1.57998e-06	295.786	0.106902	24.3002	0.0232156	0.295749	0.00699353	0.0164193	0.0115119	0.00895007	0.000467134	296.626	0.0380332	24.2155	0.0129939	0.37059	0.00437846	-0.00835602	0.00955298	0.0134982	0.000268299	0.814652	0.0999075	0.0245869	0.0190039	0.0077418	0.00545331	0.0316736	0.00642373	0.00446616	0.000382733
X	23A	outlier	0.5	36.7007	0.0230393	87.5604	15.6986	598.918	894.465	91.2078	97.929	13.3283	0.00845117		8e-17	0.0734752	4.04939e-05	7.00539e-05	1.02564e-06	654.68	0.11154	48.0781	0.0251971	0.596048	0.00761871	0.0701838	0.0122014	0.0459388	0.000671264	655.53	0.0495956	47.9453	0.0155176	0.672536	0.00532035	0.0486403	0.0103736	0.0505804	0.000551471	0.814242	0.0999075	0.0245869	0.0190039	0.0077418	0.00545331	0.0316736	0.00642373	0.0044675	0.000382733
X	23B	outlier	3	33.3613	0.0224527	65.7158	9.38289	651.204	1147.41	92.4147	99.7382	12.1045	0.008221		8e-17	0.0823985	5.16193e-05	8.82393e-06	8.83679e-07	526.827	0.108029	43.3876	0.0256811	0.53063	0.00751606	0.0837853	0.0116721	0.00474023	0.000465348	527.669	0.0410949	43.2787	0.0164085	0.604566	0.00517229	0.0495127	0.00974544	0.00934693	0.000265201	0.813844	0.0999075	0.0245869	0.0190039	0.0077418	0.00545331	0.0316736	0.00642373	0.00446885	0.000382733
X	24A	outlier	0.5	35.5956	0.0166266	47.3339	3.05273	262.794	119.254	94.4018	98.0891	12.9231	0.00609521		8e-17	0.0759031	3.07636e-05	6.46348e-05	7.88922e-07	941.7	0.117117	71.4416	0.0275545	0.894567	0.0074012	0.190349	0.0119217	0.0610763	0.000742746	942.552	0.0611137	71.2746	0.0182898	0.967662	0.00500392	0.158547	0.010043	0.0657776	0.000636312	0.813015	0.0999076	0.0245869	0.0190039	0.0077418	0.00545331	0.0316736	0.00642373	0.00447187	0.000382733
X	24B	outlier	3	33.4373	0.0166256	56.5971	4.2891	4370.78	35538.8	96.3101	97.9783	12.1323	0.00608767		8e-17	0.080759	3.35844e-05	6.83822e-05	9.19347e-07	849.986	0.112564	68.609	0.0270422	0.84265	0.007782	0.153333	0.0112898	0.0582907	0.000781267	850.839	0.051856	68.4416	0.017948	0.922242	0.00555166	0.116561	0.00928409	0.0629815	0.000681002	0.812648	0.0999076	0.0245869	0.0190039	0.0077418	0.00545331	0.0316736	0.00642373	0.00447329	0.000382733
X	25A	outlier	0.5	39.1163	0.0249574	68.7521	5.80978	-1380.21	3310.71	98.4174	90.303	14.215	0.00916685		8e-17	0.0635272	2.40562e-05	0.000328131	1.48848e-06	1193.17	0.120721	75.7604	0.0276426	0.987058	0.0079078	0.139922	0.011461	0.391666	0.00177547	1194.04	0.0677648	75.5943	0.0187446	1.06812	0.00572666	0.109717	0.0094916	0.396673	0.0017231	0.812286	0.0999076	0.0245869	0.0190039	0.0077418	0.00545331	0.0316736	0.00642373	0.00447475	0.000382733
X	25B	outlier	3	33.4324	0.0177814	76.1922	9.28613	-2622.32	15358.2	100	99.0786	12.1305	0.00651086		8e-17	0.0816779	3.92715e-05	3.1145e-05	7.94719e-07	696.978	0.109297	56.8986	0.0258583	0.691513	0.00797682	0.0950457	0.0112497	0.0218099	0.00055373	697.826	0.0443201	56.7636	0.0166639	0.76772	0.0058216	0.0673083	0.00923532	0.0264628	0.000400492	0.811938	0.0999076	0.0245869	0.0190039	0.0077418	0.00545331	0.0316736	0.00642373	0.00447621	0.000382733
Weighted mean K/Ca ±2σ						51.1797	17.3755	SE but if MSWD>1 use SE * sqrt(MSWD)
Weighted mean Age ±2σ				33.2569	0.128816	n=4/50	MSWD = 0.31
Isochron Age ±2σ				33.3223	0.207831		MSWD = 0.16
(40Ar/36Ar)trapped ±2σ				224.483	177.721
	Sample:	18L-2			Identifier:	67291
	Material:	Hornblende
	Weight:	8.0 mg
X	01A	outlier	1.5	46.1135	0.322648	0.223708	0.00231616	62.7096	32.4946	6.93125	31.5	6.76481	0.0479309	0.0918281	4e-16	0.0465648	5.77407e-05	0.0023181	6.30805e-06	386.311	0.0609778	18.0127	0.0221196	0.411001	0.00988701	23.6483	0.0294812	0.906814	0.00243191	387.731	0.051816	17.9424	0.0147392	0.508852	0.00508402	23.7733	0.0164928	0.897077	0.00229608	1.70783	0.0287143	0.0108214	0.0144957	0.0124192	0.00693545	0.0433061	0.0201927	0.00909385	0.000232044
X	01B	outlier	2	34.1165	0.0787722	0.102983	0.00105357	26.1941	2.65887	21.1344	75.1621	4.98842	0.0116255	0.18817	4e-16	0.150676	0.000106803	0.000840487	5.4455e-06	244.642	0.0544701	36.9777	0.0247955	0.606892	0.00946156	105.244	0.0309757	0.255967	0.0013028	246.064	0.0447765	36.8707	0.0165537	0.697835	0.00488967	105.34	0.0196229	0.259613	0.00124547	1.68527	0.0273359	0.0115939	0.0137975	0.0121096	0.00660805	0.0434537	0.0192185	0.00895326	0.000220933
	01C	ok	2.5	33.7778	0.0490639	0.100242	0.00102461	25.7545	2.01208	39.321	92.8183	4.93845	0.00723971	0.240944	4e-16	0.187955	0.0001103	0.000242961	4.19144e-06	251.125	0.0533283	47.3528	0.0258045	0.742225	0.00945049	138.424	0.0320852	0.12725	0.000988731	252.539	0.044581	47.2173	0.0176153	0.835319	0.00470789	138.537	0.021443	0.133429	0.000941351	1.66326	0.0260819	0.0123476	0.0131603	0.0118076	0.00631471	0.0435976	0.0183281	0.00881608	0.000210847
	01D	ok	3	34.0262	0.0543911	0.0991508	0.00101413	29.0074	3.2109	53.5649	93.2124	4.9751	0.00802688	0.188708	4e-16	0.187362	0.000126769	0.000229623	4.59473e-06	197.304	0.047389	37.0883	0.0233698	0.570449	0.00934849	109.588	0.0330385	0.097752	0.000860242	198.686	0.0378275	36.9748	0.0158875	0.666943	0.00475763	109.715	0.0194459	0.104418	0.000815408	1.64131	0.0249344	0.0130993	0.012575	0.0115064	0.00605167	0.0437412	0.0175086	0.00867928	0.000201645
	01E	ok	3.5	33.6008	0.0646101	0.0979068	0.0010041	24.3295	3.54217	62.6762	95.8014	4.91233	0.00953276	0.120711	4e-16	0.195027	0.000196996	0.000142003	5.35512e-06	121.249	0.0441089	23.7252	0.0222736	0.373387	0.00940426	70.9796	0.0289222	0.051193	0.00062223	122.586	0.0353091	23.6413	0.0164218	0.461017	0.00475622	71.107	0.0184337	0.0586896	0.000576696	1.62039	0.0239503	0.0138157	0.0120703	0.0112193	0.00583205	0.043878	0.0168004	0.00854891	0.000193783
X	01F	outlier	4	33.5336	0.104281	0.0990314	0.00102573	29.0023	8.77622	67.5412	93.9995	4.90242	0.0153854	0.0644533	4e-16	0.191746	0.000333576	0.000202985	8.2731e-06	65.8487	0.0398786	12.6676	0.0205854	0.194459	0.00877071	37.4633	0.0263268	0.0313011	0.000535736	67.2153	0.0288509	12.6079	0.0148015	0.284206	0.00485962	37.6021	0.0162202	0.039074	0.000489723	1.59974	0.0230972	0.0145226	0.0116299	0.010936	0.00564853	0.044013	0.0161804	0.00842024	0.000187003
X	01G	outlier	4.5	33.952	0.122913	0.0991025	0.00103536	4.63493	0.363774	71.2633	98.0751	4.96415	0.0181384	0.0493117	4e-16	0.197572	0.000428965	6.50559e-05	9.74046e-06	48.8937	0.0368755	9.69163	0.019662	0.264186	0.0108507	28.6246	0.026738	0.0168981	0.000470172	50.1654	0.0267274	9.64634	0.0148095	0.185806	0.0079534	28.741	0.0161395	0.0244749	0.000426971	1.52029	0.0211456	0.0172434	0.010588	0.00984574	0.00530503	0.0445326	0.0146907	0.00792506	0.000171886
	01H	ok	5	34.1858	0.195535	0.0984951	0.00107238	13.517	4.46948	73.2702	97.4532	4.99866	0.0288589	0.0265886	4e-16	0.194964	0.000725228	8.61036e-05	1.45204e-05	26.7159	0.0379432	5.22579	0.0179026	0.0933557	0.00848588	15.5269	0.0249394	0.00973987	0.000385597	27.9204	0.0273863	5.19598	0.0126185	0.173673	0.00474072	15.6603	0.0152272	0.0173287	0.000336492	1.49879	0.0210322	0.0179795	0.0105112	0.00955078	0.00532082	0.0446732	0.0145706	0.0077911	0.000171194
	01I	ok	5.5	33.6352	0.143168	0.0996431	0.00105024	34.0996	20.1743	76.3235	97.0608	4.91741	0.0211238	0.0404513	4e-16	0.197387	0.000506183	9.93806e-05	1.12907e-05	40.1459	0.0392109	7.95007	0.0187843	0.118455	0.00915923	23.3464	0.0269988	0.0151766	0.000448954	41.3318	0.0288946	7.90118	0.0139279	0.209046	0.00512312	23.457	0.0163367	0.0225241	0.00040444	1.47732	0.0211064	0.0187145	0.0105282	0.00925623	0.00538355	0.0448136	0.0145803	0.00765732	0.000172027
X	01J	outlier	6	33.7746	0.129758	0.100311	0.00103943	89.1589	87.4016	80.8115	86.0149	4.93797	0.0191466	0.0594594	4e-16	0.174195	0.000303584	0.000473203	9.99611e-06	66.8671	0.0419974	11.6855	0.0189302	0.164828	0.00852958	34.083	0.0264742	0.0479746	0.000662036	68.04	0.0330119	11.6187	0.013336	0.26138	0.00494136	34.1782	0.0167984	0.0545105	0.000623613	1.45595	0.0213642	0.0194465	0.0106376	0.00896293	0.00549105	0.0449534	0.0147185	0.00752411	0.000174348
	01K	ok	6.5	33.89	0.170867	0.0990049	0.00105518	22.9379	10.7639	83.441	94.9608	4.95499	0.0252141	0.0348362	4e-16	0.191651	0.000571946	0.000170452	1.31924e-05	35.6079	0.038874	6.84666	0.0189491	0.109035	0.0093003	20.2287	0.0266899	0.0157658	0.000466543	36.7855	0.0290059	6.80531	0.0135768	0.201097	0.00520014	20.3558	0.0155228	0.0228323	0.000420583	1.43463	0.0217977	0.0201763	0.0108357	0.00867047	0.00564043	0.0450927	0.0149804	0.00739128	0.000178087
X	01L	outlier	7	33.5449	0.121907	0.100531	0.00104953	26.9019	9.75821	87.2893	95.574	4.90408	0.017986	0.0509844	4e-16	0.194892	0.000416873	0.000149698	9.6026e-06	51.2475	0.0392661	10.0199	0.0199403	0.154948	0.00896863	29.1517	0.027245	0.0216471	0.000485972	52.3935	0.0284977	9.94906	0.014102	0.248394	0.00464167	29.2912	0.0156757	0.028456	0.000438997	1.41332	0.022397	0.0209062	0.0111181	0.008378	0.0058287	0.0452321	0.01536	0.00725845	0.00018316
	01M	ok	10	33.535	0.0656754	0.0975365	0.000999272	26.9117	4.44465	96.882	95.3666	4.90263	0.00968958	0.127087	4e-16	0.194526	0.000175297	0.000156719	5.66018e-06	127.983	0.0437926	24.9789	0.0207455	0.387008	0.0101587	74.8842	0.0283322	0.0559629	0.000697381	129.121	0.0348292	24.8486	0.014284	0.47499	0.00515568	74.9924	0.0184884	0.061929	0.000655081	1.39197	0.0231506	0.021637	0.0114791	0.00808512	0.00605257	0.0453717	0.0158496	0.00712543	0.00018947
	01N	ok	15	33.7376	0.15113	0.0977006	0.00103073	44.9294	39.3727	100	93.9841	4.93251	0.0222998	0.0413092	4e-16	0.190545	0.000493014	0.000203506	1.17377e-05	42.4695	0.0398175	8.11923	0.0195097	0.118143	0.0105167	24.296	0.0282563	0.0202937	0.00049418	43.6125	0.0273789	8.06405	0.0129678	0.214204	0.00502004	24.4135	0.015415	0.0268676	0.000441853	1.37066	0.0240418	0.0223669	0.0119105	0.00779266	0.00630765	0.0455111	0.016438	0.0069926	0.000196883
Integrated K/Ca ±2σ						0.098951	0.00202103	SD
Total integrated Age ±2σ				34.6706	0.063967	n=8/14	MSWD = *6.83
Total Integrated Age ±2σ				34.6706	0.063967									K2O wt. %=1.32
Isochron Age ±2σ				33.2646	0.259065		MSWD = *4.07
(40Ar/36Ar)trapped ±2σ				368.04	35.6097
	Sample:	18L-05			Identifier:	66901
	Material:	Biotite
	Weight:	3.19 mg
X	01A	omit	0.5	12.2144	0.706744	53.5077	51.3203	22.492	11.9585	1.40562	4.78549	4.5231	0.262588	0.134547	4e-16	0.0105801	4.28798e-05	0.00322215	7.62988e-06	389.954	0.0567038	4.12474	0.0167061	0.297899	0.00646911	0.0197198	0.018581	1.2565	0.00296964	390.3	0.0534907	4.12984	0.0131049	0.369444	0.00519315	0.107092	0.0142918	1.27468	0.00291851	0.346668	0.0188166	0.0308483	0.0102876	0.00418006	0.00385754	0.0406741	0.0118742	0.00168128	0.000107963
X	01B	omit	0.8	25.1729	0.160134	173.143	301.011	-11584	1.73599e+06	3.79765	45.2255	9.35486	0.0599198	0.228967	4e-16	0.0483447	0.000117962	0.00185361	8.47888e-06	145.23	0.0397123	7.01928	0.0170191	0.135425	0.00603721	0.0107752	0.0177103	0.269204	0.00122912	145.518	0.0353313	7.01971	0.0137178	0.210045	0.00477252	0.0825441	0.0135967	0.274414	0.00123126	0.341959	0.0181318	0.0285802	0.0098827	0.00413635	0.00369743	0.0363392	0.0113483	0.00167504	0.000103419
X	01C	omit	1	30.4746	0.121003	58.8277	29.7781	345.4	1341.38	6.55368	66.6401	11.3415	0.0454091	0.263809	4e-16	0.058758	0.000122364	0.00112891	7.44093e-06	137.675	0.0410455	8.08742	0.0166684	0.128616	0.00604355	0.035218	0.0174801	0.15544	0.00102331	137.977	0.0370888	8.08925	0.0134832	0.207047	0.00488328	0.0957536	0.0136765	0.159151	0.00102808	0.337231	0.0175827	0.0263025	0.00954516	0.00409245	0.00356062	0.031986	0.0108861	0.00166877	9.95125e-05
pX	01D	ok	1.5	32.5205	0.0451194	35.8706	3.20265	61.3853	11.4331	16.3999	80.3619	12.1098	0.016951	0.942484	4e-16	0.0663619	4.5549e-05	0.000664547	3.10945e-06	435.5	0.0621971	28.8933	0.0193965	0.435455	0.00564889	0.204763	0.0179418	0.289521	0.00135347	435.81	0.0597755	28.9103	0.0151983	0.508243	0.00447235	0.273616	0.0145491	0.294986	0.00135768	0.332509	0.0171863	0.024028	0.00928463	0.00404861	0.00345081	0.027639	0.0104992	0.00166251	9.63468e-05
pX	01E	ok	1.7	33.069	0.0335044	18.4154	0.768966	78.4244	16.8566	27.6065	87.5932	12.3158	0.0125911	1.07271	4e-16	0.0711231	4.50467e-05	0.000419829	2.26024e-06	462.493	0.0625722	32.8859	0.0203465	0.462571	0.00576781	0.451276	0.018152	0.194414	0.00104494	462.801	0.060232	32.8979	0.0159577	0.537506	0.00468059	0.513477	0.0150184	0.198624	0.00104854	0.327787	0.0169524	0.0217535	0.00910715	0.00400477	0.00337041	0.0232919	0.0101953	0.00165625	9.39906e-05
pX	01F	ok	1.9	33.3211	0.027102	13.8518	0.389074	115.782	33.7319	40.4888	91.6475	12.4106	0.0101864	1.2331	4e-16	0.0738468	4.01785e-05	0.000282628	1.83591e-06	512.034	0.0705804	37.8031	0.0198948	0.506699	0.00604384	0.6885	0.0179219	0.145091	0.000939763	512.326	0.0685303	37.8248	0.0146194	0.584863	0.00504922	0.746674	0.0148844	0.148647	0.000943916	0.323078	0.0168877	0.0194853	0.00901776	0.00396106	0.00332167	0.0189569	0.00998251	0.00165001	9.25088e-05
	01G	ok	2	33.3866	0.032387	9.52233	0.24515	77.267	20.2791	49.7196	93.1497	12.4352	0.0121733	0.883582	4e-16	0.0749087	5.44125e-05	0.000231791	2.02223e-06	361.699	0.0567866	27.0883	0.0192098	0.367211	0.00597382	0.716514	0.0168691	0.0842316	0.000731246	361.974	0.054187	27.0851	0.0153547	0.448531	0.00497583	0.76487	0.0136811	0.0869818	0.000733523	0.31858	0.0169848	0.0173185	0.00901647	0.00391929	0.00330569	0.0148157	0.0098688	0.00164405	9.19415e-05
	01H	ok	2.1	33.3626	0.0447455	6.92369	0.215835	43.4838	11.474	55.0539	94.1907	12.4262	0.0168182	0.510606	4e-16	0.0758009	8.51231e-05	0.000196561	2.37369e-06	206.559	0.0424428	15.6541	0.0172811	0.221286	0.00627752	0.568888	0.0167044	0.0409143	0.000490139	206.821	0.0387861	15.6418	0.0140815	0.288258	0.00532772	0.581265	0.0134944	0.0430897	0.000487369	0.314081	0.0172347	0.0151517	0.00909744	0.00387753	0.00332005	0.0106745	0.00984571	0.00163809	9.22188e-05
select * from StandardsTable where StandardID=0	01I	ok	2.5	33.4558	0.0255187	6.86554	0.119334	61.1084	10.0491	66.9118	95.3689	12.4613	0.00959205	1.13504	4e-16	0.0765331	4.56898e-05	0.000156689	1.53931e-06	454.774	0.0629326	34.7979	0.0202059	0.472953	0.00597984	1.27509	0.0178773	0.0719585	0.00069988	455.039	0.0604128	34.7989	0.0153976	0.543222	0.00494376	1.29543	0.0148768	0.0745356	0.000701682	0.309596	0.0176295	0.0129913	0.00925793	0.00383589	0.0033642	0.00654538	0.00991355	0.00163214	9.33287e-05
	01J	ok	3	33.5184	0.0228574	8.17312	0.14684	68.6436	11.7589	79.9326	96.2673	12.4848	0.008592	1.24637	4e-16	0.0771086	4.38786e-05	0.000126286	1.23708e-06	495.651	0.0637472	38.2105	0.0211785	0.511743	0.00604844	1.17647	0.0173273	0.0632401	0.000613015	495.957	0.061105	38.2073	0.0159798	0.582079	0.00497677	1.23111	0.0140999	0.0656968	0.000612638	0.305091	0.0181628	0.0108213	0.0094952	0.00379407	0.00343735	0.00239811	0.0100712	0.00162617	9.52519e-05
	01K	ok	3.5	33.4067	0.0463197	9.89828	0.491912	56.5901	19.6067	84.9812	96.7071	12.4428	0.0174104	0.483255	4e-16	0.0777222	9.59486e-05	0.000111403	2.13886e-06	190.662	0.0418898	14.8153	0.0179965	0.200886	0.00599601	0.376809	0.0182592	0.0214475	0.000407641	190.894	0.0374234	14.7846	0.0145577	0.27239	0.00484124	0.408356	0.015067	0.0233494	0.000401024	0.300586	0.0188215	0.00865136	0.0098032	0.00375225	0.0035376	-0.00174917	0.0103143	0.0016202	9.79375e-05
	01L	ok	5	33.5055	0.0349862	12.4928	0.532558	77.3319	26.3876	92.0916	96.7198	12.4799	0.0131511	0.680616	4e-16	0.0775011	7.09668e-05	0.000110971	1.68795e-06	269.295	0.0534462	20.8657	0.0186511	0.276287	0.00604286	0.420778	0.0173365	0.0301151	0.000454408	269.554	0.0497267	20.8577	0.0146059	0.348048	0.00480677	0.450557	0.0136908	0.0321249	0.000448756	0.296101	0.0195895	0.0064909	0.0101737	0.00371061	0.00366212	-0.00587828	0.0106356	0.00161425	0.000101309
pX	01M	ok	6	33.2444	0.0495867	5.79913	0.17884	72.1011	34.5216	96.9784	95.6294	12.3818	0.0186367	0.467768	4e-16	0.0772348	0.000100483	0.000147872	2.42445e-06	185.717	0.0458957	14.3409	0.0183163	0.192204	0.00630269	0.621505	0.0180323	0.0278038	0.000450088	185.976	0.0410838	14.3139	0.0144285	0.260264	0.00502142	0.631213	0.0142657	0.0297772	0.000443383	0.291609	0.0204581	0.00432727	0.010602	0.00366891	0.0038091	-0.0100134	0.0110297	0.0016083	0.000105315
pX	01N	ok	7	33.451	0.124304	7.59941	0.880549	108.619	243.362	98.6346	97.7505	12.4594	0.0467239	0.158533	4e-16	0.0784558	0.000278378	7.60903e-05	3.98985e-06	61.9623	0.0365774	4.86024	0.0170038	0.0627491	0.00667671	0.160808	0.0185041	0.00480305	0.000246989	62.1706	0.0296538	4.83261	0.0128166	0.131001	0.00536383	0.175553	0.0145057	0.00646847	0.000224798	0.287117	0.021414	0.00216364	0.0110808	0.0036272	0.00397591	-0.0141486	0.0114886	0.00160235	0.000109884
pX	01O	ok	10	33.3933	0.157651	9.68723	1.69754	44.6572	48.3195	99.981	95.7106	12.4377	0.0592564	0.128879	4e-16	0.0769525	0.000345283	0.000145126	5.12702e-06	51.3559	0.0392484	3.95107	0.0174684	0.0551544	0.0063756	0.102608	0.0178858	0.0075096	0.000263052	51.5965	0.0321941	3.91654	0.0129964	0.125521	0.00483081	0.115764	0.0132569	0.0092046	0.000240397	0.282612	0.0224494	-6.32051e-06	0.0116056	0.00358538	0.00416072	-0.0182959	0.0120065	0.00159638	0.000114962
X	01P	omit	15	28.0708	9.34846	0.214752	0.0915293	-3.5848	22.418	100	67.0381	10.4401	3.50361	0.00181608	4e-16	0.0642127	0.0204633	0.00111544	0.00022135	0.867252	0.0342589	0.0557656	0.0176052	-0.000156099	0.00647525	0.0650074	0.0185314	0.00100305	0.000187844	1.08706	0.0248767	0.0108403	0.0127021	0.0688736	0.00478609	0.0691713	0.0136102	0.00260661	0.000147307	0.278094	0.0235546	-0.00218262	0.0121709	0.00354344	0.00436145	-0.0224553	0.0125768	0.00159039	0.000120492
Integrated K/Ca ±2σ						10.2084	0.279469	SD
Plateau Age ±2σ				33.4598	0.0501543	n=6/16	MSWD = *3.89	steps G-L
Total Integrated Age ±2σ				32.7118	0.0306071									K2O wt. %=9.57
Isochron Age ±2σ				33.6709	0.0910625		MSWD = *4.29
(40Ar/36Ar)trapped ±2σ				255.253	3.35253
	Sample:	17L-21			Identifier:	66468
	Material:	Sanidine
	Weight:	Single Crystal
	01	ok	3	33.1511	0.019356	69.5964	7.65185	39084.4	99982.9	1.18107	99.8439	9.30035	0.00547956		8e-17	0.107438	5.88188e-05	2.66622e-06	7.3589e-07	351.223	0.0329342	37.6911	0.0202279	0.483674	0.0107632	0.0954053	0.0102923	0.0010127	0.000258118	352.081	0.0322162	37.7353	0.0158746	0.472484	0.0099194	-0.199326	0.00938295	0.00608546	0.000203337	0.845281	0.00683986	0.0132014	0.00904063	-0.00148283	0.00417753	0.0322086	0.00422987	0.00494568	0.000162005
X	02	outlier	3	33.4176	0.0160065	96.9474	10.7529	-31538.3	53644	2.56948	99.8545	9.37582	0.00453198		8e-17	0.106584	4.79645e-05	2.32769e-06	5.96364e-07	416.188	0.0350253	44.3079	0.0194511	0.557369	0.0103774	0.0810989	0.00876123	0.00103214	0.000247899	417.06	0.0344306	44.3454	0.0143499	0.528889	0.0096111	-0.206454	0.0078135	0.00609704	0.000198085	0.855904	0.00642649	0.0144121	0.00846872	-0.00162582	0.00391373	0.0311594	0.00396337	0.0049657	0.000152015
X	03	outlier	3	33.2569	0.00914159	81.0624	1.77923	-6216.77	527.224	9.20966	99.6285	9.33031	0.00258807		8e-17	0.106862	2.88302e-05	9.97809e-06	2.1603e-07	1985.28	0.0835022	211.906	0.0554581	2.54791	0.00948337	0.461857	0.00990317	0.020151	0.000428462	1986.21	0.0832808	211.948	0.0270686	2.53261	0.00874062	0.174944	0.00917511	0.0256443	0.000406973	0.866527	0.00607621	0.0156227	0.00795915	-0.00176881	0.00367912	0.0301101	0.00372694	0.00498573	0.000143356
X	04	outlier	3	33.2373	0.00954432	74.263	1.74944	-8084.08	1039.44	14.932	99.8135	9.32475	0.00270206		8e-17	0.107124	3.04431e-05	3.70333e-06	1.90842e-07	1706.68	0.0816521	182.616	0.0503181	2.22362	0.010491	0.433631	0.0100011	0.00665487	0.000325343	1707.61	0.0814456	182.666	0.0275334	2.2017	0.00989635	0.133346	0.00935775	0.0121136	0.000297964	0.877009	0.00580358	0.0168173	0.0075298	-0.00190989	0.00348201	0.0290748	0.00352902	0.00500549	0.000136363
X	05	outlier	3	33.2884	0.00864784	64.1369	0.725488	-8250.1	757.748	25.538	99.8148	9.33923	0.00244833		8e-17	0.106959	2.77753e-05	3.66508e-06	1.20703e-07	3168.07	0.116926	338.465	0.0853242	4.12501	0.00955105	0.927979	0.0102814	0.0123333	0.00038199	3169.04	0.116792	338.502	0.0331878	4.09687	0.00895408	0.62063	0.00971301	0.0181385	0.000361689	0.887604	0.00561253	0.0180247	0.00718339	-0.0020525	0.0033237	0.0280284	0.00337101	0.00502546	0.000131115
X	06	outlier	3	33.2699	0.0095766	79.3412	1.43061	-8322.07	955.071	32.4839	99.6494	9.334	0.00271124		8e-17	0.106842	3.04117e-05	9.26889e-06	1.93758e-07	2077.09	0.107219	221.664	0.061036	2.70472	0.0101111	0.493253	0.00868745	0.0196227	0.000402067	2078.05	0.107077	221.699	0.0298449	2.67032	0.00958682	0.197446	0.00805166	0.0252328	0.000384151	0.898086	0.00551576	0.0192192	0.00694019	-0.00219358	0.00321352	0.0269931	0.0032623	0.00504522	0.000127944
	07	ok	3	33.1877	0.00985456	77.7994	1.64412	-11737.1	2025.61	38.5049	99.7798	9.31072	0.00278981		8e-17	0.107249	3.14579e-05	4.84357e-06	2.061e-07	1793.64	0.0943152	192.144	0.0545856	2.37262	0.0097696	0.435819	0.00900517	0.00902411	0.000369299	1794.61	0.0941538	192.177	0.0259238	2.34942	0.00924649	0.128457	0.00841538	0.0144961	0.000349623	0.908709	0.00551629	0.0204299	0.00680564	-0.00233657	0.00315397	0.0259438	0.00320539	0.00506525	0.000126935
X	08	outlier	3	33.2495	0.0102186	77.9455	1.59039	-9434.03	1241.26	45.2025	99.6055	9.32821	0.00289298		8e-17	0.106861	3.23168e-05	1.07565e-05	2.30214e-07	2002.48	0.0989524	213.74	0.0628489	2.62193	0.00994088	0.483873	0.00965175	0.0219023	0.000460563	2003.46	0.0987931	213.765	0.029121	2.58147	0.00942887	0.180775	0.00910435	0.0275277	0.000445758	0.91905	0.00561211	0.0216083	0.00678924	-0.00247576	0.00314922	0.0249225	0.00320423	0.00508474	0.000128135
X	09	outlier	3	33.2947	0.00995842	81.8326	1.28532	-7850.38	705.978	54.536	99.8485	9.34101	0.00281938		8e-17	0.106975	3.20365e-05	2.52456e-06	1.26497e-07	2787.55	0.127837	297.854	0.0868523	3.62137	0.00910606	0.642881	0.00984869	0.00753246	0.000352239	2788.56	0.127705	297.859	0.0307092	3.59329	0.00852586	0.327012	0.00929422	0.013196	0.000329503	0.92956	0.00580102	0.0228061	0.00688927	-0.00261722	0.00319844	0.0238844	0.00325793	0.00510456	0.0001315
X	10	outlier	3	29.1162	0.0128036	78.8129	0.865741	-8511.7	959.876	74.0851	99.6383	8.15936	0.00361664		8e-17	0.122223	5.40536e-05	9.27122e-06	9.70119e-08	5110.79	0.0137516	623.866	0.273422	7.61841	0.026315	1.39688	0.014934	0.0484336	0.000495178	5112.04	0.0123385	623.828	0.206805	7.62389	0.0261074	1.08741	0.0145502	0.0549835	0.00047922	0.940014	0.00607196	0.0239974	0.00710053	-0.00275793	0.00329904	0.0228519	0.00336361	0.00512426	0.000136835
X	11	outlier	3	33.4645	0.0154306	62.2521	3.85868	68577.8	167915	76.0964	99.7534	9.3891	0.00436904		8e-17	0.106325	4.63035e-05	5.75935e-06	5.53382e-07	604.362	0.0442649	64.1853	0.0273526	0.820904	0.00976076	0.181043	0.0110321	0.0036243	0.000334057	605.375	0.0435036	64.2361	0.0187107	0.805634	0.0087521	-0.142276	0.0101106	0.00901546	0.000282846	0.98809	0.00817408	0.0300949	0.00928574	-0.00371059	0.00432124	0.0182733	0.0044138	0.00519678	0.000182237
X	12	outlier	3	33.3028	0.0104812	66.8497	1.64627	-10850.1	1845.82	81.2225	99.6135	9.34332	0.00296739		8e-17	0.106697	3.27935e-05	1.04872e-05	2.68336e-07	1534.96	0.0966384	163.587	0.0485139	2.0166	0.00919521	0.430181	0.0103949	0.0164255	0.000411468	1535.98	0.0963125	163.615	0.0217011	1.98646	0.00818378	0.109988	0.00947214	0.0220687	0.000374804	0.981508	0.00792936	0.0300018	0.00900568	-0.00394648	0.00419256	0.0191038	0.00428167	0.00516513	0.000176754
	13	ok	3	33.1728	0.0190645	51.6063	3.68911	-61033	189245	82.5858	99.5161	9.3065	0.00539709		8e-17	0.107014	5.58208e-05	1.37785e-05	8.53108e-07	407.028	0.0352534	43.5077	0.0222589	0.55112	0.00957958	0.147585	0.010402	0.0057229	0.000346859	408.028	0.0344024	43.5652	0.0174214	0.512234	0.00867107	-0.159978	0.00953512	0.0110132	0.000304329	0.975084	0.00769898	0.0299109	0.00874043	-0.00417674	0.00407195	0.0199144	0.0041573	0.00513424	0.00017157
	14	ok	3	33.1741	0.00984648	68.1659	1.24067	-9801.38	1329.11	88.9732	99.1178	9.30687	0.00278751		8e-17	0.106581	3.00096e-05	2.72794e-05	3.3839e-07	1914.73	0.0829771	203.839	0.0557786	2.50999	0.00935123	0.52578	0.0093803	0.0526076	0.00064736	1915.75	0.08264	203.867	0.0263756	2.47953	0.0084743	0.218237	0.00846824	0.0584983	0.000630081	0.968485	0.0074719	0.0298175	0.00847714	-0.00441326	0.00395368	0.0207472	0.00403472	0.00510251	0.000166437
	15	ok	3	33.1601	0.0160161	69.8617	5.39524	-66165.8	176613	90.6171	99.6463	9.3029	0.00453406		8e-17	0.107196	4.71581e-05	9.36504e-06	7.07209e-07	489.966	0.0402506	52.4617	0.022507	0.664425	0.00908274	0.132083	0.0100076	0.00469096	0.000346137	490.952	0.0395903	52.5147	0.0170528	0.632003	0.00822897	-0.183044	0.00920754	0.00992645	0.000308899	0.96206	0.00726098	0.0297266	0.00823059	-0.00464352	0.00384451	0.0215578	0.00392088	0.00507162	0.000161642
X	16	outlier	3	33.9811	0.173575	0.184091	0.000935126	775.293	341.375	90.7324	94.0723	9.53539	0.0491601		8e-17	0.0987261	0.000390471	0.000198336	1.0515e-05	37.3094	0.0176169	3.68711	0.0144366	0.0694929	0.00920135	3.44926	0.0111029	0.0102241	0.00039178	38.2761	0.0161406	3.75277	0.0119911	0.0392892	0.00840656	3.14074	0.010428	0.0153666	0.000362001	0.955583	0.00705942	0.029635	0.00799268	-0.00487566	0.00374093	0.0223751	0.00381211	0.00504048	0.000157029
	17	ok	3	33.1932	0.0116821	74.16	3.74356	-6830.83	1278.22	93.3397	99.7478	9.31227	0.0033072		8e-17	0.107197	3.63441e-05	5.9292e-06	3.56519e-07	777.081	0.0501828	83.2046	0.0273655	1.00514	0.00947097	0.197538	0.00977051	0.00475801	0.000276707	778.055	0.0497101	83.2496	0.0177505	0.999117	0.00874129	-0.111522	0.00903835	0.00993714	0.000233144	0.949176	0.00687193	0.0295443	0.00776883	-0.0051053	0.00364543	0.0231836	0.00371094	0.00500967	0.000152704
	18	ok	3	33.1757	0.0114803	75.0327	2.96244	-16439.8	5517.47	96.6909	99.7866	9.30732	0.00325005		8e-17	0.107296	3.562e-05	4.61015e-06	3.65469e-07	997.899	0.0597853	106.947	0.0344921	1.33204	0.00860648	0.25099	0.00970597	0.0047961	0.000364325	998.873	0.0594092	106.998	0.0219789	1.31094	0.00783738	-0.0588971	0.00900745	0.00997995	0.000335528	0.942682	0.00669498	0.0294525	0.00755465	-0.00533807	0.00355625	0.0240031	0.00361549	0.00497845	0.000148584
	19	ok	3	33.1547	0.0130015	69.3857	4.06297	-15629.1	8137.86	98.9259	99.6802	9.30138	0.00368064		8e-17	0.10725	3.99214e-05	8.2172e-06	4.52318e-07	665.799	0.0598323	71.3244	0.0255011	0.887816	0.01007	0.180721	0.010383	0.00561048	0.000300792	666.761	0.0594749	71.36	0.0168213	0.86956	0.0094517	-0.136491	0.00976584	0.0107481	0.000266174	0.936082	0.00652977	0.0293591	0.00735128	-0.00557458	0.00347411	0.0248358	0.0035264	0.00494672	0.000144692
X	20	outlier	3	33.2383	0.0226357	66.5662	8.00689	12076.4	8778.27	100	99.4282	9.32504	0.00640833		8e-17	0.106707	6.6153e-05	1.67644e-05	9.97207e-07	321.599	0.0311508	34.2774	0.0209051	0.449362	0.00898389	0.0904539	0.0106845	0.00546122	0.000320328	322.546	0.030491	34.337	0.0174739	0.411512	0.00831579	-0.210227	0.0101142	0.0104864	0.000290172	0.929344	0.00637744	0.0292637	0.00715969	-0.00581611	0.00339968	0.0256862	0.00344428	0.00491431	0.000141049
Weighted mean K/Ca ±2σ						70.837	4.65489	SE but if MSWD>1 use SE * sqrt(MSWD)
Weighted mean Age ±2σ				33.1752	0.0187228	n=8/20	MSWD = 1.28
Isochron Age ±2σ				33.1769	0.0209606		MSWD = 1.47
(40Ar/36Ar)trapped ±2σ				290.705	30.4373
	Sample:	17L-15			Identifier:	66466
	Material:	Sanidine
	Weight:	Single Crystal
	01	ok	3	34.9136	0.0135297	62.8255	3.03649	-10516.9	3350.37	5.72331	99.7787	9.79423	0.00383177		8e-17	0.10195	3.79914e-05	5.01068e-06	4.02064e-07	759.448	0.0457099	77.3393	0.0281883	0.951686	0.00984309	0.217861	0.0103492	0.00397395	0.000304999	760.605	0.0452436	77.428	0.017994	0.927658	0.00899888	-0.0799037	0.00942079	0.00996406	0.00025469	1.1403	0.0065121	0.0193374	0.00819385	0.011718	0.00398833	0.0330727	0.00428432	0.00579574	0.000171771
	02	ok	3	34.9046	0.0239219	49.947	4.83765	-18075.8	22365.9	7.95536	99.651	9.79168	0.00677493		8e-17	0.101846	6.25517e-05	9.33642e-06	1.07462e-06	296.482	0.0271533	30.1619	0.0182493	0.37668	0.00901528	0.106419	0.0101674	0.00285086	0.000318257	297.34	0.0261351	30.2302	0.0149836	0.338258	0.00809699	-0.191004	0.00914724	0.0079605	0.000276768	0.86441	0.00736576	0.0164561	0.00767247	-0.00196831	0.00396408	0.0360491	0.00443891	0.00502277	0.000161729
	03	ok	3	34.8673	0.012776	68.2195	3.59954	-4416.86	545.171	13.7649	99.5284	9.78111	0.00361823		8e-17	0.10183	3.5584e-05	1.34881e-05	4.07636e-07	771.791	0.0471967	78.5043	0.0267376	0.921815	0.00913769	0.20378	0.0105528	0.0105584	0.000314254	772.703	0.0466924	78.6081	0.0182799	0.901974	0.00835396	-0.0887664	0.00970844	0.0159006	0.00027799	0.886204	0.00688055	0.0179326	0.00717615	-0.00254378	0.00370253	0.0368999	0.00413603	0.0050823	0.000151303
	04	ok	3	34.9272	0.0105068	62.0907	1.40072	-6826.05	738.559	26.4397	99.6276	9.79808	0.00297566		8e-17	0.101755	2.98369e-05	1.01311e-05	2.65475e-07	1685.08	0.0895572	171.275	0.0486975	2.07041	0.00978823	0.487629	0.0108076	0.01744	0.000446921	1686.04	0.0893239	171.445	0.027523	2.05812	0.00915032	0.184862	0.0100933	0.0230362	0.000426947	0.907822	0.00646064	0.0193971	0.00675516	-0.00311459	0.00347578	0.0377437	0.00386396	0.00514135	0.000142493
	05	ok	3	34.8679	0.0212925	72.6579	9.07253	-9683.98	6672.37	28.6315	99.1159	9.78129	0.00603014		8e-17	0.101406	5.46211e-05	2.74685e-05	1.00395e-06	292.403	0.0339687	29.6185	0.0155048	0.36463	0.00920876	0.0722607	0.00884614	0.00808251	0.000293248	293.354	0.033414	29.7083	0.0122998	0.347427	0.0086018	-0.227251	0.00806888	0.0133899	0.000262438	0.929499	0.00611368	0.0208656	0.00641847	-0.00368695	0.00328789	0.0385898	0.00362593	0.00520055	0.000135492
	06	ok	3	34.979	0.0209926	67.6546	8.12164	-6274.76	2392.75	31.0474	99.1963	9.81276	0.00594558		8e-17	0.101163	5.41756e-05	2.47529e-05	9.50068e-07	323.059	0.0294687	32.6453	0.017147	0.393661	0.0086421	0.0854128	0.0100661	0.00805713	0.000306588	324.026	0.0288819	32.7224	0.0139459	0.390407	0.0080495	-0.209681	0.00946453	0.0134626	0.000279823	0.95147	0.00585123	0.0223541	0.00617883	-0.00426707	0.00314507	0.0394474	0.00342765	0.00526056	0.000130571
	07	ok	3	34.8551	0.0213717	75.0227	8.01401	-8762.08	3940.08	33.8454	99.2563	9.77768	0.00605252		8e-17	0.101587	5.58492e-05	2.27084e-05	9.54459e-07	372.607	0.0352133	37.8101	0.0203854	0.463329	0.00841242	0.08938	0.00935447	0.0085248	0.000355289	373.608	0.0347502	37.896	0.0170397	0.449022	0.00783713	-0.203815	0.00875993	0.0139752	0.000334125	0.973205	0.00569212	0.0238266	0.00605428	-0.00484099	0.00305749	0.0402959	0.00328173	0.00531993	0.000128105
	08	ok	3	34.9741	0.0151797	81.6547	6.97041	-46475.9	84901.1	38.117	99.5152	9.81137	0.00429921		8e-17	0.101503	4.08837e-05	1.39452e-05	5.80238e-07	569.31	0.0428986	57.7221	0.0226623	0.729957	0.00972361	0.125581	0.0104841	0.0080329	0.000329976	570.329	0.042526	57.8259	0.0158164	0.715656	0.00924011	-0.156269	0.00998624	0.0135953	0.000306638	0.995	0.00564152	0.025303	0.00604877	-0.00541645	0.003028	0.0411466	0.00319249	0.00537945	0.000128168
	09	ok	3	34.9523	0.0143186	61.4582	2.69654	-7100.72	1357.04	43.942	99.5384	9.80521	0.00405528		8e-17	0.10159	4.0133e-05	1.31548e-05	4.11369e-07	775.682	0.0421472	78.7141	0.0305569	0.953922	0.00878091	0.226275	0.00976114	0.0103735	0.000318751	776.729	0.0417596	78.8597	0.0206873	0.943486	0.00823094	-0.0652611	0.00923368	0.0160864	0.000293183	1.01685	0.00570322	0.0267835	0.00616357	-0.00599347	0.00305878	0.0419996	0.00316526	0.00543914	0.00013078
	10	ok	3	34.8948	0.0181578	56.8341	3.46057	-30905.9	38110.3	47.6882	99.2886	9.78892	0.00514244		8e-17	0.101504	4.86762e-05	2.16188e-05	7.19322e-07	499.27	0.0376552	50.6215	0.0238387	0.638467	0.00866173	0.157149	0.00942057	0.0109112	0.000358783	500.34	0.0371945	50.7384	0.0176556	0.607657	0.00806972	-0.130125	0.00885992	0.016598	0.000334885	1.03853	0.00587216	0.028252	0.00639009	-0.00656583	0.00314725	0.0428457	0.00320141	0.00549835	0.000135745
	11	ok	3	34.9	0.0223804	63.5905	6.28622	-19526.1	22219.8	50.3424	99.8137	9.79039	0.00633835		8e-17	0.102026	6.10394e-05	3.8236e-06	8.35799e-07	351.935	0.0349708	35.8663	0.0210768	0.448203	0.00909495	0.0996423	0.00968056	0.00142377	0.000293819	353.093	0.0341212	35.9794	0.0164935	0.418036	0.00811754	-0.175128	0.00880399	0.00729583	0.000234971	1.14123	0.00766176	0.0352544	0.0084529	-0.00908531	0.00410167	0.047025	0.0040253	0.00578022	0.00017992
	12	ok	3	34.9268	0.0245995	81.1896	13.5892	-137192	1.37246e+06	52.5535	99.4337	9.79797	0.00696694		8e-17	0.101558	6.22194e-05	1.67011e-05	1.21413e-06	294.532	0.0342202	29.8789	0.0179051	0.379875	0.00952379	0.0653181	0.0106941	0.0049674	0.000357225	295.679	0.0334427	29.9805	0.013935	0.348651	0.00869505	-0.212254	0.00998958	0.0108227	0.000316921	1.12987	0.00725321	0.0345304	0.00801056	-0.00858697	0.00388569	0.046757	0.00381729	0.00575058	0.00017035
	13	ok	3	35.0004	0.0140726	58.1469	2.2752	-10766.5	3520.36	58.5276	99.5564	9.81883	0.00398573		8e-17	0.101467	3.84109e-05	1.25494e-05	4.92953e-07	796.492	0.0497576	80.7284	0.0298819	0.995306	0.0103031	0.244871	0.0094285	0.0101818	0.000392262	797.64	0.04928	80.9037	0.0204985	0.962006	0.00961989	-0.047798	0.00870097	0.0161448	0.000360528	1.1186	0.00687766	0.0338124	0.00761116	-0.00809268	0.00368952	0.0464912	0.00363177	0.00572118	0.000161574
	14	ok	3	34.9133	0.0143936	61.8852	2.78033	-59574.9	102470	64.2615	99.5289	9.79416	0.00407645		8e-17	0.101695	3.90311e-05	1.3475e-05	5.41654e-07	762.756	0.0443422	77.4823	0.0291486	0.981395	0.00935054	0.221032	0.00976239	0.0104473	0.000412762	763.892	0.0438582	77.6433	0.0210558	0.938135	0.00866571	-0.0577393	0.00912537	0.0163468	0.000386328	1.1072	0.00653326	0.0330865	0.00725385	-0.00759299	0.00351255	0.0462224	0.00346868	0.00569146	0.000153551
	15	ok	3	34.8699	0.0112146	73.5146	3.35364	-14128.1	4414.54	72.2131	99.7415	9.78186	0.00317604		8e-17	0.102041	3.15291e-05	6.2658e-06	3.3629e-07	1054.19	0.0603261	107.451	0.0322094	1.33397	0.00954073	0.258821	0.0115704	0.00680442	0.00035412	1055.32	0.060004	107.647	0.0184427	1.30353	0.00893033	-0.0221384	0.0110804	0.0127263	0.00032524	1.09559	0.00622486	0.0323468	0.00694525	-0.00708385	0.0033578	0.0459486	0.00333153	0.00566118	0.000146399
	16	ok	3	34.942	0.0154146	61.9197	3.87386	-19236.4	14447.6	76.3101	99.5447	9.80228	0.00436566		8e-17	0.101627	4.09363e-05	1.29414e-05	6.39534e-07	545.375	0.0381961	55.3632	0.0217915	0.692591	0.00926036	0.15782	0.0097075	0.00717816	0.000348433	546.487	0.0377268	55.5047	0.016143	0.645454	0.0086773	-0.123328	0.00915491	0.0129862	0.000321585	1.08414	0.00596908	0.031617	0.00670312	-0.00658146	0.00323401	0.0456784	0.00322852	0.0056313	0.000140508
	17	ok	3	34.9432	0.0158323	64.6253	5.16775	-8600.39	3301.48	80.2922	99.6754	9.80262	0.00448398		8e-17	0.101757	4.30644e-05	8.51143e-06	5.85045e-07	529.388	0.0518068	53.809	0.0219944	0.657462	0.0103593	0.147063	0.011554	0.00461798	0.000309339	530.477	0.0514845	53.961	0.0166717	0.629268	0.00987093	-0.135823	0.0111131	0.0104111	0.000280337	1.0728	0.0057698	0.030895	0.00653138	-0.00608447	0.00314314	0.0454111	0.00316131	0.00560174	0.000135968
	18	ok	3	34.9224	0.0109041	59.1663	1.30961	-6432.39	760.314	90.7952	99.434	9.79673	0.00308818		8e-17	0.101571	3.05553e-05	1.66933e-05	3.1496e-07	1398.87	0.0685735	141.928	0.0415681	1.71177	0.00997926	0.423024	0.00920668	0.0236658	0.00044019	1399.97	0.0683421	142.177	0.0220207	1.69396	0.00949009	0.134467	0.00865803	0.0297477	0.000422905	1.06135	0.00562851	0.0301651	0.00643181	-0.00558207	0.00308606	0.0451409	0.00313072	0.00557185	0.000132815
	19	ok	3	34.8903	0.0150461	66.5236	4.1389	-7801.43	2671.74	95.2694	99.5309	9.78764	0.00426118		8e-17	0.101765	4.10267e-05	1.34041e-05	5.52738e-07	594.78	0.0435416	60.4605	0.0237836	0.736105	0.0114396	0.160581	0.00981043	0.00809233	0.000328412	595.86	0.0431861	60.6147	0.016994	0.713225	0.0110211	-0.124312	0.00929482	0.0138433	0.000303632	1.04995	0.00555252	0.0294392	0.00641003	-0.00508238	0.0030659	0.0448721	0.00313862	0.00554213	0.000131214
	20	ok	3	34.9	0.0162196	59.6797	3.08632	-20595.6	13772.5	100	99.4936	9.79039	0.00459356		8e-17	0.101698	4.46953e-05	1.46715e-05	5.52248e-07	629.274	0.0401496	63.9249	0.0276145	0.800868	0.00877469	0.188888	0.00960926	0.00937602	0.000347165	630.349	0.0397651	64.0709	0.0207268	0.763028	0.00821547	-0.0936208	0.00906663	0.0151071	0.000324112	1.03874	0.00554316	0.0287251	0.00646457	-0.00459079	0.00308239	0.0446077	0.00318343	0.00551289	0.000131186
Weighted mean K/Ca ±2σ						61.6922	2.07156	SE but if MSWD>1 use SE * sqrt(MSWD)
Weighted mean Age ±2σ				34.9179	0.0239612	n=20/20	MSWD = *6.52
Isochron Age ±2σ				34.9051	0.0261103		MSWD = *6.77
(40Ar/36Ar)trapped ±2σ				324.422	42.5663
	Sample:	17L-22			Identifier:	66469
	Material:	Sanidine
	Weight:	Single Crystal
X	01	outlier	3	41.1318	0.226301	0.142384	0.000774039	215.424	31.2951	0.938994	95.1392	11.5676	0.064361		8e-17	0.0822953	0.00039071	0.000162584	9.32928e-06	36.0497	0.0157778	2.97188	0.0140022	0.0998405	0.00879212	3.58826	0.0096222	0.00880795	0.000335855	36.9236	0.0146305	3.01394	0.0124513	0.0665285	0.00817627	3.27912	0.00907737	0.0135354	0.000313458	0.870335	0.00590665	0.0284289	0.00636714	-0.00793102	0.00323264	0.0331321	0.00319188	0.00463059	0.000127151
	02	ok	3	35.1966	0.0279432	55.6144	6.88464	-10075.8	10124.1	8.25689	99.7211	9.88231	0.00792142		8e-17	0.100982	7.43712e-05	6.98318e-06	1.06796e-06	228.989	0.0233142	23.0982	0.0168012	0.283895	0.0101066	0.0726787	0.00886145	0.0016558	0.00024426	229.862	0.0225401	23.1472	0.0146689	0.261119	0.00956286	-0.225643	0.00825578	0.00633372	0.000210199	0.863911	0.00595799	0.028338	0.00639135	-0.00816128	0.00327027	0.0339428	0.00321984	0.0045997	0.000127849
	03	ok	3	35.2206	0.0210374	53.1834	5.22406	24128.8	36044.6	18.1829	99.8049	9.88911	0.00596381		8e-17	0.100997	5.58982e-05	4.14504e-06	8.09151e-07	310.553	0.027878	31.3303	0.0170356	0.404336	0.0084526	0.103011	0.00997246	0.00137016	0.000250963	311.416	0.0272181	31.3863	0.0142462	0.374578	0.00777395	-0.202356	0.00942504	0.00602523	0.000217388	0.857469	0.00602933	0.0282468	0.00643818	-0.00839217	0.00331845	0.0347557	0.0032586	0.00456872	0.000128991
X	04	outlier	3	37.1346	0.017965	60.884	4.45638	5185.29	1130.63	34.3326	99.2894	10.432	0.00509817		8e-17	0.095243	4.17013e-05	2.17409e-05	7.28223e-07	535.779	0.0356661	50.9747	0.0219305	0.69366	0.00921836	0.146694	0.0105598	0.0117625	0.000389794	536.653	0.0351369	51.0224	0.0179197	0.654859	0.00857727	-0.153514	0.0100281	0.0164919	0.000370226	0.850922	0.00612147	0.0281542	0.0065084	-0.00862681	0.00337767	0.0355818	0.00330859	0.00453724	0.000130595
	05	ok	3	35.2194	0.0329707	57.5094	10.866	-9459.54	10781.4	40.1334	99.6992	9.88878	0.00934675		8e-17	0.100894	8.49672e-05	7.7257e-06	1.4483e-06	181.675	0.0209992	18.3096	0.0152383	0.224544	0.00969221	0.0557273	0.0103655	0.00144686	0.000262786	182.525	0.0200528	18.3705	0.0131734	0.203577	0.00905851	-0.242288	0.00980267	0.00601133	0.000229053	0.84434	0.00623318	0.0280611	0.00660126	-0.00886271	0.00344708	0.0364123	0.00336915	0.0045056	0.00013264
	06	ok	3	35.2228	0.0337903	43.5389	6.18865	-2683.69	845.234	45.6245	99.5344	9.88974	0.00957911		8e-17	0.100717	8.86173e-05	1.33111e-05	1.36391e-06	172.277	0.0223703	17.3321	0.0150502	0.192352	0.00893535	0.0694101	0.00974916	0.00234541	0.000234658	173.119	0.0214467	17.391	0.0129481	0.159471	0.00821069	-0.226375	0.00912259	0.00689016	0.000193955	0.837828	0.00636156	0.0279689	0.0067142	-0.0090961	0.00352493	0.037234	0.00343869	0.00447429	0.000135072
X	07	outlier	3	31.9962	3.0724	0.649842	0.14301	28.9489	10.3577	45.6793	42.1714	8.97583	0.869452		8e-17	0.0469992	0.00353551	0.00195649	8.66348e-05	3.68734	0.0122169	0.173279	0.01301	0.0299236	0.00918482	0.0459213	0.00949116	0.00725178	0.000318346	4.52	0.0103411	0.242183	0.0110608	-0.00521849	0.00844549	-0.245499	0.00881575	0.0117577	0.000289487	0.831386	0.00650499	0.0278778	0.00684553	-0.00932699	0.00361035	0.0380469	0.00351635	0.00444331	0.000137857
X	08	outlier	3	42.2353	0.025792	59.1394	5.9656	-6924.64	2986.15	56.3793	98.8852	11.8815	0.00733976		8e-17	0.0832762	4.59521e-05	3.5717e-05	9.26519e-07	405.956	0.0364873	33.7733	0.0183304	0.41066	0.00916684	0.0999783	0.00992358	0.0145698	0.000375803	406.798	0.035873	33.8119	0.0151412	0.38481	0.00838445	-0.19651	0.00924592	0.0191887	0.000351202	0.824805	0.0066673	0.0277847	0.00699869	-0.00956288	0.00370565	0.0388774	0.00360421	0.00441167	0.000141067
X	09	outlier	3	38.8083	0.517815	0.16831	0.00231207	122.598	21.2481	56.7678	95.4798	10.9072	0.147082		8e-17	0.0875937	0.00101263	0.000150929	2.24182e-05	14.013	0.0136662	1.22902	0.0141159	0.0602141	0.0076075	1.25503	0.00938384	0.00314821	0.000313821	14.8264	0.0118265	1.29864	0.0121504	0.0254046	0.00658427	0.957818	0.00862266	0.00757325	0.000281021	0.818083	0.00684834	0.0276896	0.00717363	-0.00980378	0.00381072	0.0397255	0.00370219	0.00437935	0.000144702
X	10	outlier	3	68.2755	0.53639	0.0933465	0.000766352	233.308	63.232	57.374	98.0162	19.3449	0.154831		8e-17	0.0506863	0.000391947	6.59234e-05	6.84219e-06	37.7772	0.0144156	1.92128	0.0147717	0.061355	0.00978122	3.53062	0.00981364	0.00539263	0.000258056	38.5849	0.012582	1.97837	0.0127962	0.0156197	0.00896202	3.23652	0.00904656	0.00982069	0.000213307	0.811624	0.00703579	0.0275982	0.00735817	-0.0100353	0.00391848	0.0405406	0.0038036	0.00434829	0.000148509
	11	ok	3	35.1917	0.0351971	57.0646	9.68565	4760.77	3087.33	63.0537	99.7902	9.88093	0.00997776		8e-17	0.101066	9.14345e-05	4.64129e-06	1.51537e-06	177.579	0.0243396	17.9273	0.0159979	0.2447	0.0107353	0.0549304	0.00917938	0.00086948	0.00026879	178.351	0.0230689	17.9814	0.0131227	0.213009	0.00982357	-0.239674	0.0081634	0.00513134	0.000215763	0.773082	0.00776127	0.027787	0.00809498	-0.0106411	0.00432954	0.0447046	0.0041976	0.00420461	0.000163533
	12	ok	3	35.2528	0.037898	51.1617	10.1204	20567.5	60856.3	68.4132	99.7387	9.89823	0.0107438		8e-17	0.100837	9.99785e-05	6.39033e-06	1.49113e-06	167.948	0.0246597	16.9167	0.0165567	0.218926	0.0107012	0.0577173	0.0112588	0.00111956	0.000250075	168.717	0.02354	16.9811	0.014152	0.204859	0.00988628	-0.236481	0.0105323	0.00539878	0.00019858	0.767843	0.0073462	0.0284761	0.0076762	-0.0100227	0.00409594	0.0446386	0.00397873	0.0042227	0.000154955
X	13	outlier	3	37.3998	0.29894	0.0905116	0.00065309	-16373.4	311655	69.0735	97.2573	10.5072	0.0848466		8e-17	0.0926238	0.000633865	9.06202e-05	1.41045e-05	22.5247	0.0150363	2.09304	0.0141843	0.0267913	0.0106727	3.96347	0.00945429	0.00529758	0.000317182	23.2855	0.0133296	2.15656	0.0121485	-0.0200721	0.00994412	3.68133	0.00866625	0.00959962	0.0002836	0.762604	0.0069579	0.0291651	0.00729667	-0.00940427	0.0038756	0.0445727	0.00377885	0.0042408	0.000147075
	14	ok	3	35.1561	0.0297475	75.7022	15.4257	-307855	9.45261e+06	75.4247	99.7154	9.87084	0.00843273		8e-17	0.101094	7.58146e-05	7.17321e-06	1.38112e-06	198.521	0.0254957	20.047	0.0147715	0.25488	0.00877257	0.046524	0.00928695	0.00146044	0.000273871	199.285	0.0246275	20.0897	0.0122746	0.222055	0.00796881	-0.240591	0.00856129	0.00579894	0.00023773	0.757294	0.00659648	0.0298635	0.00695863	-0.00877744	0.00366825	0.0445058	0.00359887	0.00425914	0.000139921
X	15	outlier	3	36.5741	0.848808	0.0897932	0.00195871	289.537	266.086	75.6438	92.5412	10.2729	0.240804		8e-17	0.090141	0.0018383	0.000250378	3.6152e-05	7.68051	0.0115065	0.694594	0.0140571	0.0198385	0.00966563	1.32557	0.0104506	0.00301244	0.000277306	8.4362	0.00964563	0.769246	0.0123632	-0.00938467	0.0090173	1.03581	0.00986624	0.00733459	0.0002452	0.751997	0.00627383	0.0305601	0.00667533	-0.00815228	0.00348035	0.0444392	0.00344558	0.00427743	0.000133756
	16	ok	3	35.1548	0.0238329	68.1695	10.0389	-6043.36	2938.46	83.9831	99.7693	9.87046	0.00675606		8e-17	0.101152	6.36005e-05	5.34822e-06	9.13293e-07	260.51	0.0297643	26.3219	0.0162162	0.315755	0.00927109	0.0676878	0.0097846	0.00144522	0.000237607	261.262	0.0291539	26.3727	0.0136677	0.287036	0.00865788	-0.210801	0.00920305	0.00580985	0.000201752	0.746744	0.00599708	0.031251	0.00645443	-0.00753217	0.00331575	0.044373	0.00332298	0.00429558	0.000128735
	17	ok	3	35.2609	0.0349781	69.4907	16.0098	-2684.54	860.61	89.4318	99.6664	9.90055	0.00991604		8e-17	0.100741	8.98614e-05	8.84319e-06	1.53653e-06	170.906	0.0227946	17.1981	0.0151361	0.190727	0.00902274	0.0433963	0.00981069	0.00154283	0.000262282	171.647	0.0220533	17.2597	0.0131716	0.156582	0.00844609	-0.240828	0.00926315	0.00592156	0.000232801	0.741391	0.00576589	0.031955	0.00629745	-0.00690029	0.00317387	0.0443056	0.00323167	0.00431406	0.000124875
	18	ok	3	35.3823	0.131746	53.5353	40.5088	2456.15	3294.22	90.6616	99.09	9.93495	0.0373516		8e-17	0.0998105	0.000333275	2.83847e-05	5.79349e-06	38.9359	0.0160944	3.88194	0.0128516	0.0565322	0.00933843	0.012659	0.00943992	0.00111525	0.000225274	39.6677	0.0150909	3.94228	0.0112024	0.0312106	0.00882183	-0.27163	0.008889	0.00547346	0.000191041	0.736109	0.0055942	0.0326497	0.00621499	-0.00627682	0.00306294	0.0442391	0.00317769	0.00433231	0.000122426
	19	ok	3	35.2319	0.0288415	67.708	13.117	-7633.25	5992.92	97.2022	99.6915	9.8923	0.00817624		8e-17	0.10085	7.54407e-05	7.98934e-06	1.18599e-06	204.934	0.0253812	20.6447	0.0151885	0.250889	0.00931908	0.05343	0.0101619	0.00167821	0.000242724	205.665	0.0247822	20.6924	0.0127999	0.21905	0.00882899	-0.231724	0.0096576	0.0060822	0.000212206	0.730671	0.00548158	0.0333649	0.00620831	-0.00563486	0.00298231	0.0441707	0.00316152	0.00435109	0.000121402
	20	ok	3	35.2658	0.0605621	88.2815	49.0299	1245.12	385.483	100	99.5913	9.90192	0.017169		8e-17	0.100651	0.000155225	1.13874e-05	2.67139e-06	87.8347	0.0179557	8.83082	0.0134826	0.143728	0.00966749	0.0176243	0.0095566	0.00101634	0.000234333	88.5584	0.0171123	8.88906	0.0116775	0.112223	0.00920979	-0.264892	0.00901044	0.00542605	0.000202117	0.725417	0.00543836	0.0340559	0.00627744	-0.00501475	0.00293939	0.0441045	0.00318444	0.00436923	0.000121892
Weighted mean K/Ca ±2σ						55.1014	5.3915	SE but if MSWD>1 use SE * sqrt(MSWD)
Weighted mean Age ±2σ				35.2081	0.0277534	n=12/20	MSWD = 1.46
Isochron Age ±2σ				35.1483	0.0680738		MSWD = 0.97
(40Ar/36Ar)trapped ±2σ				541.495	256.381
[truncated: 44 more columns]

## Sheet: Baughman Creek
Baughman Volcano Ar/Ar analytical data.
	Sample:	18L-25			Identifier:	67490
	Material:	Biotite
	Weight:	3.28 mg
																				Corrected1										Intercepts2										Blanks
	N	Tag	Power	Age	±1σ	K/Ca	±1σ	K/Cl	±1σ	Cum. %39Ar	%40Ar*	40Ar*/39ArK	±1σ	K2O	Sensitivity	39Ar/40Ar	±1σ	36Ar/40Ar	±1σ	40Ar	±1σ	39Ar	±1σ	38Ar	±1σ	37Ar	±1σ	36Ar	±1σ	40Ar	±1σ	39Ar	±1σ	38Ar	±1σ	37Ar	±1σ	36Ar	±1σ	40Ar	±1σ	39Ar	±1σ	38Ar	±1σ	37Ar	±1σ	36Ar	±1σ
			W	(Ma)	(Ma)					(%)	(%)			(wt. %)	mol/fA					(fA)		(fA)		(fA)		(fA)		(fA)		(fA)		(fA)		(fA)		(fA)		(fA)		(fA)		(fA)		(fA)		(fA)		(fA)
X	01A	outlier	0.5	4.12301	7.97721	2.02926	0.541177	465.373	545.721	0.0932877	0.34516	0.602473	1.16698	0.00567	2.13e-16	0.00572908	0.000162921	0.00337241	2.18908e-05	148.147	0.0662307	0.84872	0.0241289	0.112044	0.00938732	0.110244	0.0292288	0.49966	0.0032353	149.218	0.0633069	0.801581	0.0213793	0.173632	0.00710902	0.0545358	0.0216837	0.492301	0.00313025	1.18152	0.0194614	0.0295414	0.0107835	0.00558506	0.00613055	0.0259262	0.0195994	0.00517823	0.000159018
X	01B	outlier	0.8	20.3699	0.65424	6.77551	0.329442	4031.16	2237.52	1.54696	8.33485	2.9898	0.0965614	0.0883542	2.13e-16	0.027878	4.172e-05	0.00310203	7.43172e-06	474.422	0.0617997	13.224	0.0197136	0.450611	0.00796342	0.514414	0.0249991	1.47187	0.00352045	475.563	0.0585893	13.0985	0.0162643	0.518014	0.00508256	0.471916	0.0155184	1.44015	0.003267	1.18506	0.0196595	0.0295414	0.0107835	0.00558506	0.00613055	0.0259262	0.0195994	0.00521143	0.000161099
X	01C	outlier	1	29.8316	0.193769	20.4164	2.48397	2440.77	701.299	3.28168	50.7852	4.38989	0.0287472	0.105435	2.13e-16	0.115694	0.000151547	0.00166537	1.06351e-05	136.426	0.0426626	15.7801	0.0200693	0.262087	0.00813722	0.203687	0.0247799	0.227274	0.00144901	137.513	0.0377495	15.6205	0.0166627	0.325366	0.00535077	0.17623	0.0151628	0.226815	0.00139397	1.18819	0.0198765	0.0295414	0.0107835	0.00558506	0.00613055	0.0259262	0.0195994	0.00524084	0.000163264
pX	01D	ok	1.5	31.041	0.0577597	35.3649	2.25697	3688.44	524.341	9.14509	76.0041	4.56938	0.00857479	0.356377	2.13e-16	0.166348	7.70728e-05	0.000811813	4.45815e-06	320.718	0.0534195	53.3372	0.0230241	0.758059	0.00864613	0.397394	0.0253607	0.260514	0.00142895	321.84	0.049482	52.9666	0.0193547	0.827669	0.00609687	0.353989	0.0160944	0.259245	0.00137091	1.1913	0.020129	0.0295414	0.0107835	0.00558506	0.00613055	0.0259262	0.0195994	0.00527005	0.0001657
pX	01E	ok	1.7	31.1976	0.0372518	41.5303	2.73887	3875.95	488.484	15.7879	88.2785	4.59262	0.00553074	0.40375	2.13e-16	0.192238	8.49242e-05	0.000396357	3.26821e-06	314.421	0.0543597	60.4271	0.0245084	0.823375	0.00810373	0.383319	0.0252788	0.124779	0.00102719	315.504	0.0503788	60.0062	0.0208627	0.889367	0.0052997	0.32015	0.0159649	0.126949	0.000983195	1.19443	0.0204194	0.0295414	0.0107835	0.00558506	0.00613055	0.0259262	0.0195994	0.00529946	0.000168428
pX	01F	ok	1.9	31.2369	0.0326688	34.3359	1.96941	3997.52	539.948	22.2345	92.2203	4.59846	0.0048504	0.391822	2.13e-16	0.200568	9.21032e-05	0.000262935	2.91861e-06	292.461	0.0587815	58.6421	0.0241533	0.788763	0.00821514	0.449868	0.0258023	0.0770877	0.000853259	293.568	0.0550056	58.2413	0.0205076	0.858261	0.00546853	0.414689	0.0167816	0.0804853	0.000812196	1.19742	0.0207279	0.0295414	0.0107835	0.00558506	0.00613055	0.0259262	0.0195994	0.00532745	0.000171269
pX	01G	ok	2	31.2373	0.0322383	24.2333	1.13239	4091.92	654.012	27.7231	93.6122	4.59851	0.00478649	0.333595	2.13e-16	0.203593	0.000100833	0.00021582	2.86631e-06	245.301	0.0524927	49.9278	0.0222516	0.667935	0.00821537	0.542605	0.0253536	0.0531727	0.000702835	246.401	0.0480808	49.5704	0.0185478	0.737729	0.00546889	0.468924	0.0160833	0.0572013	0.000661582	1.20039	0.0210648	0.0295414	0.0107835	0.00558506	0.00613055	0.0259262	0.0195994	0.00535531	0.000174323
	01H	ok	2.1	31.2065	0.0368956	20.3694	1.06687	3577.25	662.35	31.8553	94.0123	4.59394	0.00547788	0.251153	2.13e-16	0.204667	0.000129209	0.000202277	3.18621e-06	183.71	0.0483284	37.5891	0.021542	0.508186	0.00835792	0.485925	0.0254489	0.0373689	0.000585073	184.83	0.0433167	37.3191	0.0180346	0.574029	0.00568077	0.427912	0.0162331	0.0418168	0.00054139	1.20336	0.0214312	0.0295414	0.0107835	0.00558506	0.00613055	0.0259262	0.0195994	0.00538326	0.0001776
	01I	ok	2.5	31.1872	0.0254977	8.59275	0.0957228	3375.57	312.727	40.1701	93.586	4.59109	0.0037856	0.505375	2.13e-16	0.203865	7.65323e-05	0.000216708	2.28947e-06	371.118	0.0544893	75.6389	0.0260398	1.02925	0.00831875	2.31751	0.0258037	0.0814252	0.000849267	372.236	0.0499284	75.1302	0.022109	1.10035	0.00562298	2.25264	0.0167838	0.0847949	0.000805859	1.20633	0.0218228	0.0295414	0.0107835	0.00558506	0.00613055	0.0259262	0.0195994	0.00541108	0.000181064
	01J	ok	3	31.1074	0.0160704	9.08073	0.0547891	3328.94	192.499	55.7645	94.7419	4.57923	0.00238584	0.947822	2.13e-16	0.206918	5.30184e-05	0.000177582	1.41769e-06	685.757	0.0782832	141.859	0.0322754	1.92747	0.00820537	4.1122	0.0247928	0.123557	0.000971537	686.918	0.0750509	140.954	0.0262511	1.99981	0.00545385	4.05068	0.0151837	0.125909	0.000924817	1.20945	0.0222624	0.0295414	0.0107835	0.00558506	0.00613055	0.0259262	0.0195994	0.00544037	0.000184915
	01K	ok	3.5	31.125	0.0167503	11.3622	0.09336	3504.97	226.056	70.8769	95.5956	4.58184	0.0024868	0.918532	2.13e-16	0.208663	5.5669e-05	0.000148686	1.50308e-06	659.007	0.0825669	137.475	0.032125	1.85499	0.0087604	3.18442	0.0261543	0.0993638	0.000990059	660.142	0.0793781	136.601	0.0263248	1.91984	0.00625788	3.13708	0.0173179	0.102355	0.000943931	1.21254	0.0227246	0.0295414	0.0107835	0.00558506	0.00613055	0.0259262	0.0195994	0.00546942	0.000188929
	01L	ok	5	31.1434	0.0155321	10.9219	0.0780433	3459.94	199.836	87.2768	95.6502	4.58458	0.00230596	0.996779	2.13e-16	0.208658	4.82601e-05	0.000146836	1.4207e-06	715.165	0.0722868	149.186	0.0307226	2.01521	0.00803305	3.59442	0.0256729	0.106569	0.00101552	716.304	0.0684589	148.226	0.0238626	2.08314	0.00519098	3.56787	0.016582	0.109395	0.000968085	1.21564	0.0232113	0.0295414	0.0107835	0.00558506	0.00613055	0.0259262	0.0195994	0.00549847	0.000193125
	01M	ok	6	31.1476	0.0271097	13.3426	0.301497	3919.28	526.466	93.6186	95.4766	4.58521	0.00402484	0.385451	2.13e-16	0.208251	9.59228e-05	0.000152711	2.39212e-06	277.092	0.0558381	57.6893	0.0238313	0.770976	0.00821292	1.1376	0.0257008	0.042807	0.000662565	278.226	0.0505641	57.2827	0.0201633	0.846139	0.0054652	1.08349	0.0166252	0.0472582	0.000614346	1.21854	0.0236889	0.0295414	0.0107835	0.00558506	0.00613055	0.0259262	0.0195994	0.00552572	0.000197218
pX	01N	ok	7	30.8864	0.066528	16.6862	1.52256	4421.16	2052.35	95.5518	94.548	4.54642	0.00987566	0.117504	2.13e-16	0.207985	0.000259812	0.000184142	5.65272e-06	84.5791	0.0413993	17.5864	0.0202025	0.233286	0.00808322	0.277261	0.0252968	0.015694	0.000477854	85.6784	0.0335956	17.4331	0.0168009	0.301678	0.00526828	0.233612	0.0159934	0.0208533	0.000419878	1.22148	0.0241917	0.0295414	0.0107835	0.00558506	0.00613055	0.0259262	0.0195994	0.0055533	0.000201503
pX	01O	ok	12	31.1058	0.0341918	17.8176	0.7492	3684.45	641.693	100	95.1943	4.57899	0.00507616	0.270359	2.13e-16	0.207917	0.000123551	0.000162268	2.99076e-06	194.667	0.0503017	40.4636	0.0216171	0.544021	0.00817492	0.597334	0.0251145	0.0318463	0.00058196	195.82	0.0438056	40.1586	0.0180549	0.610119	0.00540792	0.554598	0.0157036	0.0366283	0.000528141	1.22449	0.0247252	0.0295414	0.0107835	0.00558506	0.00613055	0.0259262	0.0195994	0.00558153	0.000206029
Integrated K/Ca ±2σ						10.6373	0.0899737	SD
Plateau Age ±2σ				31.1378	0.0247603	n=6/15	MSWD = 2.33	steps H-M
Total Integrated Age ±2σ				30.9397	0.0292156									K2O wt. %=6.08
Isochron Age ±2σ				31.1407	0.042754		MSWD = *5.10
(40Ar/36Ar)trapped ±2σ				295.984	3.6541
	Sample:	18L-25			Identifier:	67850
	Material:	Biotite
	Weight:	3.14 mg
pX	01A	ok	0.5	12.6624	2.13338	6.09459	0.896232	44.81	37.6682	0.61796	1.66756	1.826	0.308714	0.0320117	2.13e-16	0.00913233	3.02342e-05	0.00332766	7.69938e-06	510.184	0.0664326	4.65748	0.0154064	0.381801	0.00577549	0.118983	0.0174169	1.69783	0.00392177	510.418	0.0611232	4.64021	0.0150827	0.485884	0.00567106	0.222963	0.0159909	1.70178	0.00376405	0.672407	0.0260241	0.0289884	0.00239744	0.00413504	0.00109333	0.0053733	0.00690201	0.00325102	0.000189548
X	01B	outlier	0.8	27.7988	0.198383	30.3819	5.408	46.4914	9.92749	3.06637	41.7347	4.02542	0.0289456	0.126833	2.13e-16	0.103679	0.000104006	0.00197173	9.46301e-06	178.051	0.0508145	18.4524	0.0177444	0.315384	0.00562353	0.0952474	0.0167707	0.351153	0.0016818	178.249	0.0444803	18.4176	0.0165283	0.419706	0.00551623	0.221315	0.0152846	0.354558	0.00165769	0.670377	0.0245686	0.0289884	0.00239744	0.00413504	0.00109333	0.0053733	0.00690201	0.00325613	0.000178856
X	01C	outlier	1	30.3725	0.099684	49.2606	11.2263	58.8441	11.8196	6.45003	68.5171	4.40122	0.0145652	0.175281	2.13e-16	0.155681	0.000121736	0.00106537	7.20862e-06	163.873	0.0453799	25.5007	0.0186449	0.369878	0.0057702	0.0816317	0.0183102	0.174657	0.00118015	164.05	0.0389903	25.4558	0.0167724	0.477678	0.00566567	0.18871	0.0169596	0.177994	0.0011631	0.668314	0.0232184	0.0289884	0.00239744	0.00413504	0.00109333	0.0053733	0.00690201	0.00326133	0.000168852
pX	01D	ok	1.5	30.9448	0.0376034	25.1051	0.761421	55.91	3.00017	19.3182	84.563	4.48485	0.00549607	0.666599	2.13e-16	0.188557	7.64526e-05	0.000522332	3.18085e-06	514.554	0.068446	96.9808	0.0371151	1.33844	0.00581709	0.604648	0.0171313	0.269314	0.00163618	514.759	0.0648003	96.7883	0.0243304	1.44924	0.00571342	0.711091	0.0156794	0.272695	0.00161981	0.666284	0.0220404	0.0289884	0.00239744	0.00413504	0.00109333	0.0053733	0.00690201	0.00326644	0.000160018
	01E	ok	1.75	31.0867	0.0228215	21.7655	0.472997	53.2674	2.25546	35.8967	92.5681	4.50559	0.00333582	0.858806	2.13e-16	0.205457	7.56109e-05	0.000251418	1.96138e-06	608.393	0.071327	124.944	0.0435349	1.69555	0.00601251	0.897463	0.0170937	0.153777	0.001193	608.599	0.0681524	124.709	0.026142	1.79834	0.00591227	1.00875	0.0156383	0.157117	0.00117959	0.664268	0.0210428	0.0289884	0.00239744	0.00413504	0.00109333	0.0053733	0.00690201	0.00327151	0.000152408
	01F	ok	2	31.1255	0.0199394	18.7733	0.365685	49.5775	1.81932	52.7034	94.5893	4.51126	0.00291461	0.870625	2.13e-16	0.209679	7.54746e-05	0.000183016	1.68444e-06	604.347	0.0699674	126.664	0.0431159	1.72242	0.00556882	1.0537	0.0173706	0.111564	0.00101774	604.557	0.0669744	126.418	0.0259107	1.82097	0.00546044	1.13827	0.0159405	0.114893	0.00100506	0.662261	0.0202455	0.0289884	0.00239744	0.00413504	0.00109333	0.0053733	0.00690201	0.00327657	0.000146161
	01G	ok	2.5	31.1263	0.0157401	15.628	0.225968	57.5608	1.95226	75.8996	96.1131	4.51138	0.00230079	1.20161	2.13e-16	0.213052	7.1159e-05	0.000131448	1.22995e-06	820.901	0.0834702	174.819	0.0555348	2.33638	0.00570617	1.74503	0.0177651	0.10949	0.00100942	821.122	0.0811201	174.48	0.0296868	2.45075	0.00560044	1.83056	0.0163695	0.112822	0.000997416	0.660253	0.0196676	0.0289884	0.00239744	0.00413504	0.00109333	0.0053733	0.00690201	0.00328162	0.000141419
	01H	ok	2.75	31.1688	0.0217166	13.6787	0.347002	51.0964	3.46105	85.3069	96.7392	4.51759	0.00317446	0.487319	2.13e-16	0.214145	9.41814e-05	0.000110258	1.77946e-06	331.22	0.0509516	70.8989	0.0291848	0.956615	0.00606071	0.807955	0.0186811	0.037254	0.000589097	331.398	0.0471391	70.7744	0.0219401	1.06023	0.00596128	0.917414	0.0173593	0.0405586	0.000572352	0.658332	0.0193383	0.0289884	0.00239744	0.00413504	0.00109333	0.0053733	0.00690201	0.00328646	0.000138434
pX	01I	ok	3	31.23	0.0361055	10.8943	0.450845	51.4355	7.26086	89.3791	97.2192	4.52654	0.00527797	0.210948	2.13e-16	0.214782	0.000155329	9.40133e-05	2.99526e-06	142.951	0.0432062	30.6906	0.0201555	0.413432	0.00557034	0.438689	0.0175323	0.0138376	0.000427845	143.116	0.0386863	30.6323	0.0181289	0.516077	0.00546199	0.507785	0.0161166	0.0171373	0.000405384	0.656411	0.0192393	0.0289884	0.00239744	0.00413504	0.00109333	0.0053733	0.00690201	0.00329129	0.000137068
pX	01J	ok	3.5	31.2116	0.0314567	22.7211	1.59952	55.7648	7.69152	94.0158	97.6549	4.52384	0.00459835	0.24019	2.13e-16	0.215873	0.000145017	7.92672e-05	2.50862e-06	161.945	0.0464601	34.9444	0.0212165	0.466628	0.0057075	0.240322	0.016623	0.0130562	0.000405945	162.126	0.042228	34.8798	0.0186384	0.564719	0.0056018	0.322269	0.0151224	0.0163577	0.000382084	0.654496	0.0193734	0.0289884	0.00239744	0.00413504	0.00109333	0.0053733	0.00690201	0.00329611	0.000137368
pX	01K	ok	4	31.403	0.0824452	13.329	2.11539	663.898	4250.74	95.2874	97.9055	4.55182	0.0120531	0.0658723	2.13e-16	0.215097	0.000376721	7.07867e-05	6.55374e-06	44.5738	0.036821	9.58362	0.0147985	0.11743	0.00615815	0.112014	0.0176675	0.00325595	0.000291664	44.7189	0.0310862	9.56511	0.0142892	0.21411	0.00606032	0.186226	0.0162635	0.00655822	0.000256374	0.652586	0.0197339	0.0289884	0.00239744	0.00413504	0.00109333	0.0053733	0.00690201	0.00330092	0.000139308
pX	01L	ok	5	31.345	0.100559	28.1635	10.703	40.8653	17.7803	96.3554	95.6611	4.54334	0.0147009	0.0553267	2.13e-16	0.210558	0.000460639	0.000146744	7.65113e-06	38.2449	0.0381583	8.04924	0.01567	0.111488	0.00570839	0.044719	0.0168439	0.00565342	0.000292154	38.3835	0.0323043	8.02671	0.0152422	0.212966	0.00560271	0.152681	0.0153649	0.0089615	0.000254975	0.650673	0.0203098	0.0289884	0.00239744	0.00413504	0.00109333	0.0053733	0.00690201	0.00330574	0.000142825
pX	01M	ok	6	31.3829	0.227891	14.6312	6.90201	30.8045	23.6388	96.8182	96.2509	4.54889	0.0333163	0.0239725	2.13e-16	0.211598	0.0010566	0.000126786	1.73348e-05	16.4897	0.0359735	3.48769	0.0156645	0.0501109	0.00578923	0.0371394	0.017437	0.00212475	0.000285361	16.6304	0.0291488	3.47593	0.0153867	0.14749	0.00568505	0.150119	0.0160129	0.00543618	0.000244239	0.648763	0.0210818	0.0289884	0.00239744	0.00413504	0.00109333	0.0053733	0.00690201	0.00331054	0.000147798
pX	01N	ok	7	31.264	0.0955381	12.1127	1.83067	38.0893	14.1335	98.0115	97.0589	4.5315	0.0139662	0.0618152	2.13e-16	0.214193	0.000459165	9.9438e-05	7.23186e-06	42.005	0.0387545	8.99339	0.0174003	0.125274	0.00583408	0.115573	0.0173616	0.00428237	0.00030333	42.1674	0.031881	8.97848	0.0169169	0.219606	0.00573072	0.204809	0.0159307	0.00760228	0.000261391	0.646845	0.0220344	0.0289884	0.00239744	0.00413504	0.00109333	0.0053733	0.00690201	0.00331537	0.000154119
pX	01O	ok	12	31.289	0.0678148	10.4747	0.843787	3.70553	0.107603	100	95.7451	4.53515	0.0099136	0.103009	2.13e-16	0.211123	0.000270454	0.000143903	5.70924e-06	71.0153	0.0386963	14.9867	0.0173718	0.452878	0.00759909	0.222564	0.0177251	0.0104468	0.000405069	71.1782	0.0310119	14.9552	0.016336	0.378723	0.00752002	0.318026	0.0163261	0.0137796	0.00037155	0.644924	0.0231445	0.0289884	0.00239744	0.00413504	0.00109333	0.0053733	0.00690201	0.00332021	0.000161626
Integrated K/Ca ±2σ						17.2342	0.445314	SD
Plateau Age ±2σ				31.1275	0.029321	n=4/15	MSWD = 2.28	steps E-H
Total Integrated Age ±2σ				30.8999	0.0336258									K2O wt. %=5.18
Isochron Age ±2σ				31.1827	0.0201476		MSWD = *3.42
(40Ar/36Ar)trapped ±2σ				287.465	1.27994
	Sample:	18L-20			Identifier:	67302
	Material:	Biotite
	Weight:	3.23 mg
X	01A	outlier	0.5	6.20252	0.238216	17.6142	0.997495	45.354	8.31305	3.76753	6.91821	0.898239	0.0345566	0.449021	4e-16	0.0770204	5.52705e-05	0.00314997	7.25665e-06	462.011	0.0662414	35.5772	0.025014	0.755368	0.00952764	0.577535	0.0319947	1.4556	0.00334604	462.519	0.0573606	35.3557	0.0157573	0.856765	0.00493694	0.672187	0.0154119	1.43053	0.00313197	0.751913	0.0289305	0.00950201	0.0150455	0.00728987	0.00653577	0.019193	0.0227459	0.00516012	0.000192065
X	01B	outlier	0.8	20.0425	0.0982649	22.9494	1.41053	88.6628	27.8035	7.96182	47.2089	2.91354	0.0143629	0.499882	4e-16	0.162037	0.000114417	0.00178647	7.16664e-06	244.484	0.0518729	39.6069	0.0266689	0.590415	0.00929276	0.494186	0.0297409	0.436998	0.00174955	244.953	0.0414278	39.3741	0.0180714	0.692841	0.00498411	0.591277	0.0139441	0.43314	0.00167968	0.75504	0.0275498	0.0114225	0.0143221	0.00693738	0.00623408	0.0207448	0.021643	0.0052086	0.00018333
X	01C	outlier	1	27.35	0.0874279	28.5778	2.4562	102.552	45.9668	11.6003	62.3957	3.98376	0.01283	0.433634	4e-16	0.156628	0.000114755	0.00127252	6.24066e-06	219.407	0.049145	34.3578	0.0239627	0.489944	0.00998046	0.344783	0.0291677	0.279364	0.00136769	219.936	0.0389902	34.153	0.0152668	0.578019	0.00508445	0.429583	0.0144033	0.278829	0.00131534	0.758172	0.0262574	0.0133455	0.0136402	0.00658446	0.00596042	0.0222984	0.0205956	0.00525714	0.00017552
X	01D	outlier	1.5	30.6158	0.0529502	33.7807	1.56791	112.02	26.0361	19.5512	71.649	4.46345	0.00778429	0.947602	4e-16	0.160527	7.15257e-05	0.000959374	3.74066e-06	467.815	0.0637168	75.0805	0.0318365	1.03623	0.0102607	0.638275	0.0285984	0.449115	0.00174875	468.34	0.0563431	74.6566	0.0167923	1.12627	0.00522554	0.740729	0.0141811	0.445103	0.00167906	0.761304	0.025069	0.0152684	0.0130077	0.00623153	0.00571925	0.023852	0.0196143	0.00530568	0.000168777
X	01E	outlier	1.7	31.6217	0.0467029	32.2315	1.32617	121.242	26.4683	27.8623	75.9262	4.61137	0.00686963	0.990539	4e-16	0.164654	7.80234e-05	0.000814625	3.34535e-06	476.757	0.0647321	78.4825	0.0356145	1.06448	0.00927098	0.698809	0.0275745	0.388715	0.00159393	477.268	0.0582864	78.0454	0.0208835	1.16105	0.0048396	0.809282	0.0142163	0.386008	0.00153169	0.764432	0.0240012	0.0171889	0.0124325	0.00587904	0.00551506	0.0254037	0.0187105	0.00535416	0.00016324
	01F	ok	1.9	32.0021	0.0411039	26.6664	0.939837	86.7259	13.5742	35.7987	81.4579	4.66732	0.00604733	0.945872	4e-16	0.174532	8.10123e-05	0.000627421	3.15102e-06	429.492	0.058079	74.9437	0.0332598	1.0139	0.00887096	0.804946	0.0269265	0.269865	0.00135273	430.02	0.0514376	74.5541	0.0191677	1.09975	0.00481649	0.942868	0.015127	0.269703	0.00130365	0.769963	0.0224558	0.0205855	0.0115795	0.00525564	0.0052564	0.028148	0.0173352	0.0054399	0.000156749
	01G	ok	2	31.9187	0.0442382	15.3072	0.418871	109.759	27.6545	42.1804	83.0768	4.65506	0.00650816	0.760576	4e-16	0.17847	9.15132e-05	0.000572633	3.51378e-06	337.735	0.0549978	60.2627	0.029287	0.801326	0.0091314	1.1235	0.0283839	0.193949	0.00118618	338.265	0.0487403	59.9518	0.018385	0.89123	0.00524143	1.23446	0.0144228	0.19541	0.00114426	0.773087	0.0218058	0.0225036	0.0112054	0.00490359	0.00517434	0.0296978	0.0167064	0.00548832	0.000155114
	01H	ok	2.1	31.9772	0.0479588	12.074	0.332397	151.517	67.3471	47.0043	85.7781	4.66366	0.00705574	0.574926	4e-16	0.183933	0.000109579	0.000481213	3.93822e-06	247.713	0.0521205	45.5534	0.0253795	0.593104	0.00885513	1.07544	0.0273876	0.119732	0.000975095	248.237	0.0461385	45.3316	0.0168602	0.689218	0.0051002	1.19089	0.0151069	0.122788	0.000938972	0.776211	0.0213361	0.0244218	0.0109195	0.00455154	0.00514155	0.0312476	0.0162006	0.00553674	0.000155013
	01I	ok	2.5	32.004	0.0294612	8.50198	0.11598	126.366	24.6293	56.4448	89.0467	4.6676	0.00433442	1.12513	4e-16	0.190781	7.8964e-05	0.000370595	2.41673e-06	467.376	0.0631281	89.1492	0.0348498	1.1575	0.00897436	2.98508	0.0269197	0.17468	0.00112913	467.929	0.0576872	88.706	0.021795	1.25492	0.00523244	3.09482	0.0158254	0.176647	0.00108868	0.779378	0.0210562	0.0263661	0.0107269	0.00419469	0.00515957	0.0328185	0.0158254	0.00558582	0.000156479
	01J	ok	3	31.9163	0.0279276	13.4267	0.233574	160.814	37.1806	66.359	89.3042	4.6547	0.0041086	1.1816	4e-16	0.191863	7.31558e-05	0.00036188	2.31933e-06	488.063	0.060433	93.6218	0.0337301	1.20368	0.00876077	1.98733	0.0278654	0.177599	0.00113163	488.601	0.0542163	93.1676	0.0197384	1.29428	0.00484076	2.10607	0.0153809	0.179605	0.00108996	0.785308	0.0210865	0.0300075	0.0106458	0.00352635	0.00532917	0.0357607	0.0155273	0.00567774	0.000163292
X	01K	outlier	3.5	31.7865	0.0232764	15.2406	0.24155	129.526	21.0597	78.6542	90.4486	4.63561	0.00342409	1.46536	4e-16	0.195122	7.00959e-05	0.000323151	1.89153e-06	595.164	0.0673214	116.105	0.0395446	1.49928	0.00941235	2.17205	0.0261907	0.193398	0.00112543	595.731	0.0624648	115.543	0.0240521	1.58393	0.00526078	2.28523	0.0146338	0.195113	0.00108181	0.788429	0.0213918	0.0319233	0.0107518	0.00317474	0.00548499	0.0373085	0.0155905	0.0057261	0.000168827
	01L	ok	5	32.0017	0.0200706	8.09327	0.102267	108.828	16.288	89.6437	94.7978	4.66727	0.00295284	1.30974	4e-16	0.203117	7.43026e-05	0.000175963	1.6243e-06	511.02	0.0587183	103.777	0.0359993	1.33533	0.00926476	3.64728	0.0270719	0.0917253	0.000829788	511.576	0.0525974	103.291	0.0213755	1.43128	0.00488312	3.74555	0.0154107	0.0956003	0.000791132	0.791541	0.0218861	0.0338343	0.0109566	0.00282399	0.0056816	0.0388526	0.0158036	0.00577434	0.000175534
	01M	ok	6	31.9331	0.0221532	12.3148	0.241332	114.345	26.2003	97.2565	96.9061	4.65717	0.00325912	0.907309	4e-16	0.208085	9.15439e-05	0.000104613	1.77119e-06	345.552	0.053721	71.8892	0.0295601	0.91776	0.00948509	1.66234	0.0276927	0.0369716	0.00061182	346.098	0.0464373	71.5596	0.0196756	0.996376	0.0047618	1.74484	0.0141186	0.0420232	0.000570201	0.79427	0.0224655	0.03551	0.0112133	0.00251644	0.00588461	0.0402065	0.0161093	0.00581664	0.000182286
	01N	ok	7	32.089	0.0737066	7.55749	0.388623	67.7827	47.7111	98.7534	96.7331	4.68011	0.0108444	0.17841	4e-16	0.206695	0.000329347	0.000110468	5.47823e-06	68.4051	0.0425185	14.1363	0.0207373	0.186271	0.00977947	0.531787	0.0267276	0.0078202	0.000374458	68.9237	0.0323931	14.0843	0.0144935	0.269611	0.00486017	0.663601	0.0143945	0.0135177	0.000313614	0.797061	0.0231882	0.0372238	0.0115454	0.0022019	0.00611871	0.0415911	0.01653	0.0058599	0.000189939
	01O	ok	15	31.966	0.0978432	15.5109	2.10452	-337.526	1390.53	100	92.6825	4.66202	0.0143947	0.148566	4e-16	0.198808	0.000383334	0.000247552	7.49812e-06	59.2223	0.0427758	11.7714	0.0210424	0.142712	0.00957375	0.216213	0.0291122	0.0147669	0.000443678	59.7451	0.0313407	11.731	0.0138063	0.226547	0.00470227	0.326451	0.0143116	0.0204089	0.000381808	0.802616	0.024971	0.0406346	0.0123918	0.00157588	0.00665293	0.0443469	0.0176601	0.005946	0.000207084
Integrated K/Ca ±2σ						12.9932	0.332886	SD
Fixed Plateau Age ±2σ				31.93	0.06	n=9/15	MSWD* = 7.88	steps F-J
Total Integrated Age ±2σ				30.1794	0.0280031									K2O wt. %=11.92
Isochron Age ±2σ				31.9694	0.0621502		MSWD = 2.20
(40Ar/36Ar)trapped ±2σ				295.468	3.16087
	Sample:	19L-12			Identifier:	67300
	Material:	Biotite
	Weight:	2.62 mg
X	01A	outlier	0.5	19.6675	0.400384	33.3726	10.1866	22.49	6.64818	1.56726	15.704	2.86318	0.0586012	0.177596	4e-16	0.0548485	0.000109968	0.00285265	9.68012e-06	207.817	0.0496748	11.3961	0.0226851	0.282734	0.00996973	0.0987449	0.0298205	0.592876	0.00200661	208.443	0.0387384	11.3552	0.0135392	0.359581	0.00520989	0.165657	0.0149091	0.587288	0.00191189	0.888402	0.0267103	0.0652456	0.0153487	0.000466934	0.00730313	0.000165573	0.0195405	0.00671786	0.000240918
X	01B	outlier	0.8	34.5916	0.0857538	42.0145	8.17466	-192.01	271.934	4.33709	82.881	5.05644	0.0126539	0.313867	4e-16	0.163915	0.000199571	0.000579264	6.01781e-06	122.898	0.0446917	20.1405	0.0234	0.249747	0.00989241	0.138955	0.0266575	0.0712561	0.000738986	123.5	0.0342792	20.0524	0.0155916	0.351627	0.00511697	0.229829	0.0140845	0.0763226	0.000684672	0.872556	0.0255108	0.0639497	0.014648	0.00102397	0.00696883	0.00178847	0.0186612	0.00654349	0.000229655
	01C	ok	1	35.3174	0.0698823	56.5973	17.6727	124.488	134.782	6.72329	95.7693	5.16356	0.010316	0.270395	4e-16	0.185476	0.000252092	0.000143094	4.71715e-06	93.5689	0.0442966	17.3509	0.0221036	0.221471	0.0100517	0.0892395	0.0273788	0.0134325	0.000441112	94.1642	0.0344055	17.2795	0.0152083	0.3099	0.00527966	0.169263	0.0144489	0.0195229	0.000372341	0.856732	0.024391	0.0626557	0.013985	0.00158022	0.00665177	0.00340908	0.017839	0.00636937	0.000218791
	01D	ok	1.5	34.3034	0.0269557	89.3548	14.3002	91.7739	22.6664	14.17	96.9564	5.0139	0.00397698	0.843834	4e-16	0.19338	0.000105309	0.000102916	1.87739e-06	280.07	0.0541615	54.1476	0.0275517	0.699035	0.00964556	0.178095	0.0276883	0.0289102	0.000525577	280.639	0.0450509	53.8955	0.0181094	0.783809	0.00503915	0.248169	0.0146494	0.0345073	0.000470228	0.840863	0.0233576	0.0613579	0.0133624	0.00213804	0.00635317	0.00503427	0.0170786	0.00619476	0.00020834
	01E	ok	1.7	33.4646	0.0190688	251.815	78.0178	169.58	56.4818	24.849	98.301	4.89019	0.00281208	1.2101	4e-16	0.201022	8.68773e-05	5.74081e-05	1.25455e-06	386.366	0.0587838	77.6502	0.0313846	0.972926	0.0100399	0.0949654	0.0273088	0.0222249	0.0004845	386.928	0.0519878	77.2769	0.0188659	1.05872	0.00520786	0.196438	0.0146952	0.0277899	0.000430679	0.825084	0.0224313	0.0600675	0.0127914	0.00269271	0.00607831	0.00665029	0.016395	0.00602113	0.00019846
	01F	ok	1.9	33.1207	0.0156769	424.102	153.569	197.405	57.171	38.5874	98.8736	4.83948	0.00231144	1.55679	4e-16	0.204312	7.74477e-05	3.80307e-05	9.67964e-07	489.057	0.0611549	99.8967	0.0357094	1.24425	0.00955262	0.076056	0.0243726	0.0186335	0.000473214	489.61	0.0550485	99.4021	0.0205219	1.33997	0.00529966	0.183286	0.014331	0.0240967	0.000422836	0.809305	0.0216189	0.0587771	0.0122751	0.00324739	0.00582855	0.0082663	0.0157931	0.0058475	0.000189169
	01G	ok	2	33.0192	0.0182498	271.042	91.7636	119.028	25.944	48.7842	99.0278	4.8245	0.00269063	1.15546	4e-16	0.205266	9.29008e-05	3.28125e-05	1.08791e-06	361.295	0.0583255	74.1442	0.0313249	0.939629	0.00891771	0.0846614	0.0264628	0.0118952	0.000392822	361.826	0.0526922	73.7914	0.02006	1.0175	0.00481748	0.156202	0.0141001	0.0171497	0.00034359	0.777859	0.0203919	0.0562055	0.0114377	0.00435279	0.0054191	0.0114869	0.0148754	0.00550148	0.000172783
	01H	ok	2.1	33.1069	0.0285059	237.052	124.243	140.878	69.0404	54.1511	99.2487	4.83744	0.00420294	0.608152	4e-16	0.205173	0.000143675	2.53344e-05	1.72373e-06	190.245	0.0465304	39.0241	0.0255972	0.490897	0.00901154	0.0504547	0.0246608	0.00484369	0.000327691	190.753	0.0400638	38.8517	0.0179911	0.575781	0.00492878	0.124395	0.014443	0.0100707	0.000274696	0.762057	0.0199966	0.0549132	0.0111278	0.00490825	0.00526468	0.0131052	0.0145738	0.00532761	0.000165832
	01I	ok	2.5	33.054	0.0168271	505.945	236.005	170.13	45.1006	66.6276	98.9538	4.82964	0.00248093	1.41379	4e-16	0.204894	8.70154e-05	3.53144e-05	9.63709e-07	442.872	0.0579881	90.7207	0.0366195	1.13464	0.00923484	0.0591343	0.0238911	0.0156663	0.000426617	443.365	0.052955	90.2931	0.0204176	1.22539	0.00525706	0.145338	0.01494	0.0204982	0.000385796	0.746323	0.019763	0.0536265	0.0109018	0.00546135	0.00514932	0.0147166	0.0143892	0.00515447	0.000159916
	01J	ok	3	33.1366	0.0187356	893.726	1057.99	17.1285	0.626222	76.3811	99.1083	4.84181	0.00276245	1.10523	4e-16	0.204698	9.61682e-05	3.00889e-05	1.08244e-06	346.547	0.0505916	70.921	0.0316473	1.13496	0.00980944	0.0288378	0.0268406	0.0104517	0.000374866	347.033	0.0452476	70.5938	0.018935	1.05356	0.00700301	0.0983829	0.0148167	0.0152194	0.00033263	0.730409	0.0196948	0.0523251	0.0107623	0.00602075	0.00507431	0.0163464	0.0143245	0.00497936	0.00015507
	01K	ok	3.5	33.0585	0.0235884	895.433	1445	151.202	62.952	82.9248	99.1662	4.8303	0.00347781	0.741499	4e-16	0.205306	0.000120208	2.81269e-05	1.40236e-06	231.81	0.0478306	47.5807	0.0260592	0.597105	0.00867663	0.019315	0.0244999	0.00652843	0.000324842	232.264	0.0416699	47.3742	0.0167409	0.504814	0.00481884	0.103754	0.013278	0.0111978	0.000279687	0.714316	0.0197996	0.051009	0.0107158	0.00658645	0.00504296	0.0179945	0.0143854	0.00480228	0.000151444
	01L	ok	5	33.0761	0.019649	687.718	624.271	70.2867	13.995	92.1977	99.0648	4.8329	0.00289703	1.05077	4e-16	0.204986	0.000100535	3.15592e-05	1.1514e-06	329.007	0.0561883	67.4259	0.0309786	0.880597	0.012651	0.0338597	0.0254161	0.0103999	0.000378593	329.433	0.0507113	67.1044	0.0192581	0.92966	0.0050736	0.118576	0.0141084	0.0146584	0.000339655	0.684282	0.0204496	0.0485528	0.0108861	0.00764222	0.00510609	0.0210705	0.0148314	0.0044718	0.000148405
	01M	ok	6	33.1076	0.0296761	449.043	523.367	111.355	47.4307	97.0357	98.8785	4.83754	0.00437548	0.548229	4e-16	0.204404	0.000142225	3.78652e-05	1.92806e-06	172.145	0.0444769	35.1789	0.0227195	0.447344	0.00893901	0.025429	0.0260774	0.00653022	0.000331642	172.549	0.0364652	35.0038	0.0158343	0.530324	0.00493393	0.119258	0.0149512	0.0106955	0.000288598	0.668503	0.0210133	0.0472624	0.0111054	0.0081969	0.00520115	0.0226865	0.0152286	0.00429817	0.000148835
	01N	ok	7	32.8056	0.0538088	425.975	1043.25	568.379	2602.07	99.2926	99.4116	4.79302	0.00793232	0.255748	4e-16	0.207415	0.000273354	1.98209e-05	3.36161e-06	79.1397	0.0412861	16.4109	0.0198589	0.200507	0.00880434	0.0124259	0.0269444	0.00157409	0.000265694	79.5208	0.0322532	16.3243	0.0135902	0.292723	0.00485152	0.103368	0.0144697	0.00566595	0.000212117	0.652724	0.0217154	0.045972	0.0114081	0.00875157	0.00533619	0.0243025	0.0157277	0.00412454	0.000150657
X	01O	outlier	15	33.3068	0.179421	23.4917	9.40102	-75.722	169.621	100	93.6827	4.86692	0.0264569	0.0801562	4e-16	0.192494	0.000768804	0.000213705	1.15767e-05	26.7265	0.0364001	5.14356	0.0193106	0.0587063	0.0101428	0.0629634	0.0250088	0.00574202	0.00030905	27.088	0.0252963	5.11598	0.0132777	0.151409	0.0050388	0.124185	0.0138259	0.00957688	0.00026059	0.63699	0.0225405	0.0446853	0.0117865	0.00930466	0.00550772	0.0259139	0.0163175	0.00395141	0.000153812
Integrated K/Ca ±2σ						285.152	74.4282	SD
No Plateau Age						n=12/15
Total Integrated Age ±2σ				33.0962	0.0184124									K2O wt. %=11.33
Isochron Age ±2σ				32.5394	0.0760571		MSWD = *3.65
(40Ar/36Ar)trapped ±2σ				788.224	35.2435
	Sample:	18L-21			Identifier:	67489
	Material:	Biotite
	Weight:	2.63 mg
	01A	ok	0.5	18.1635	1.2495	5.69266	0.659389	2980.29	3771.03	0.708671	5.01223	2.66297	0.184102	0.0363862	2.13e-16	0.0188221	7.84983e-05	0.00321447	1.03618e-05	232.151	0.0548934	4.36911	0.018191	0.199345	0.00815332	0.218364	0.0252758	0.746324	0.00239895	233.544	0.047131	4.2638	0.0144705	0.26425	0.00537521	0.0303673	0.0159602	0.73389	0.00226607	1.46963	0.0281416	0.0295414	0.0107835	0.00558506	0.00613055	0.0259262	0.0195994	0.00629864	0.000238596
X	01C	outlier	0.8	27.5465	0.269159	14.8825	2.09809	-5027.86	5017.08	2.25411	44.4066	4.04901	0.0398615	0.0793493	2.13e-16	0.109679	0.000220221	0.00188124	1.40808e-05	86.8845	0.0430573	9.52764	0.0185362	0.137621	0.00831161	0.181861	0.0256352	0.163514	0.00122059	88.2306	0.0334218	9.40952	0.0148693	0.21054	0.00561242	0.0314687	0.0165235	0.165671	0.00116176	1.4578	0.0271461	0.0295414	0.0107835	0.00558506	0.00613055	0.0259262	0.0195994	0.00625868	0.000230119
X	01D	outlier	1	31.1711	0.165458	21.7217	3.68573	8244.61	10812.5	4.12056	68.8457	4.58633	0.0245524	0.0958315	2.13e-16	0.150123	0.000262918	0.0010541	1.15849e-05	76.6646	0.0428804	11.5066	0.0190933	0.160563	0.00803833	0.150459	0.0255283	0.0808666	0.00088686	78.0601	0.0334716	11.3767	0.0155333	0.221542	0.00519914	-0.001554	0.0163572	0.0850864	0.000832262	1.45359	0.0268026	0.0295414	0.0107835	0.00558506	0.00613055	0.0259262	0.0195994	0.00624449	0.000227176
	01F	ok	1.7	32.3538	0.0483135	20.4271	0.624863	8929.83	2778.58	13.8012	81.9848	4.76189	0.0071739	0.497046	2.13e-16	0.172185	8.00229e-05	0.000609392	3.82054e-06	346.69	0.0727204	59.6808	0.0247059	0.791343	0.00865342	0.82037	0.0250924	0.211585	0.00132361	347.74	0.0670302	59.249	0.0211141	0.846528	0.00610722	0.679465	0.0156682	0.211481	0.00126418	1.14565	0.0281994	0.0295414	0.0107835	0.00558506	0.00613055	0.0259262	0.0195994	0.00520501	0.000211267
	01H	ok	2	32.4766	0.0394801	12.9251	0.305446	11551.4	5207.99	22.0756	87.7991	4.78013	0.00586265	0.42484	2.13e-16	0.183694	9.25535e-05	0.000412594	3.23274e-06	277.762	0.0562159	51.0114	0.0234973	0.658308	0.00838607	1.1076	0.0261693	0.115043	0.000897445	278.78	0.048523	50.6453	0.0199737	0.714908	0.00572211	0.957596	0.0173406	0.117341	0.000844783	1.14123	0.0283855	0.0295414	0.0107835	0.00558506	0.00613055	0.0259262	0.0195994	0.00518625	0.000212657
	01I	ok	2.1	32.2966	0.0511472	12.907	0.497217	10031.4	6077.33	27.1628	90.2123	4.7534	0.00759442	0.261201	2.13e-16	0.189804	0.000140357	0.000330911	4.26543e-06	165.277	0.0504049	31.3629	0.0211085	0.403596	0.00819118	0.681827	0.0262614	0.0549643	0.000704606	166.319	0.0417039	31.11	0.0176563	0.457489	0.00543248	0.545541	0.0174793	0.0587688	0.000652203	1.14113	0.0283097	0.0295414	0.0107835	0.00558506	0.00613055	0.0259262	0.0195994	0.00518426	0.00021209
	01K	ok	3	32.5962	0.0175825	10.8426	0.069873	7435.56	887.744	53.1984	93.4405	4.79789	0.0026111	1.33678	2.13e-16	0.194774	4.55173e-05	0.000221648	1.50344e-06	824.276	0.0817945	160.507	0.0336712	2.07193	0.00801718	3.91785	0.0252336	0.184375	0.00123866	825.318	0.0774496	159.49	0.0267954	2.14738	0.00516638	3.87437	0.0158934	0.184232	0.00118271	1.10687	0.0263039	0.0295414	0.0107835	0.00558506	0.00613055	0.0259262	0.0195994	0.00447755	0.000206059
	01L	ok	3.5	32.6405	0.0203832	11.6518	0.131763	9382.83	1932.45	69.5851	94.7601	4.80446	0.0030271	0.841364	2.13e-16	0.197255	6.03034e-05	0.00017698	1.73622e-06	512.273	0.0621951	101.022	0.028202	1.28707	0.00835332	2.29428	0.025936	0.0916451	0.000889047	513.333	0.0566216	100.368	0.0235622	1.35745	0.005674	2.24561	0.0169864	0.0938497	0.000840466	1.10982	0.0257338	0.0295414	0.0107835	0.00558506	0.00613055	0.0259262	0.0195994	0.00450526	0.000201615
	01N	ok	5	32.6808	0.0205705	10.0565	0.0954929	8040.29	1413.5	86.1403	95.0438	4.81046	0.00305499	0.850013	2.13e-16	0.197599	6.1402e-05	0.000167378	1.75309e-06	516.638	0.0697856	102.061	0.0284169	1.30736	0.00839424	2.68431	0.0254774	0.0876261	0.000905292	517.652	0.0654774	101.387	0.0237666	1.38219	0.00573407	2.66	0.0162777	0.0900244	0.000859804	1.11856	0.0241401	0.0295414	0.0107835	0.00558506	0.00613055	0.0259262	0.0195994	0.00458727	0.000189295
	01O	ok	6	32.7589	0.0381617	23.8468	1.44759	8610.29	3806.43	92.2504	93.6672	4.82205	0.00566775	0.313718	2.13e-16	0.194268	0.000118484	0.000213976	3.15013e-06	193.946	0.0498647	37.6675	0.0208042	0.482925	0.00830526	0.417732	0.0253566	0.0416768	0.000610689	194.959	0.0439084	37.3981	0.0171585	0.549966	0.005603	0.382827	0.0160878	0.0452484	0.000564983	1.12153	0.0236335	0.0295414	0.0107835	0.00558506	0.00613055	0.0259262	0.0195994	0.00461518	0.000185419
	01Q	ok	7	32.6414	0.0575854	17.8556	1.30341	7491.03	4549.71	96.2153	93.6089	4.8046	0.00855198	0.203577	2.13e-16	0.194852	0.000187766	0.000215948	4.70745e-06	125.478	0.0459874	24.4433	0.021771	0.315282	0.00864061	0.361795	0.0264077	0.027251	0.000590417	126.511	0.0405065	24.2499	0.0185459	0.387211	0.00608905	0.310908	0.0176983	0.0313004	0.000549132	1.13378	0.021773	0.0295414	0.0107835	0.00558506	0.00613055	0.0259262	0.0195994	0.00473014	0.000171448
X	01R	outlier	12	32.1607	0.0680923	31.0798	4.04349	11368.9	10032.2	100	86.5629	4.73322	0.0101097	0.194321	2.13e-16	0.182902	0.000168588	0.000454433	5.56482e-06	127.598	0.043016	23.3318	0.0200043	0.302288	0.00788809	0.198364	0.0258064	0.0580652	0.000709624	128.624	0.0373798	23.1439	0.0164878	0.372353	0.0049637	0.163698	0.016788	0.0613728	0.000669873	1.13753	0.0212869	0.0295414	0.0107835	0.00558506	0.00613055	0.0259262	0.0195994	0.00476529	0.0001679
Integrated K/Ca ±2σ						12.2678	0.149292	SD
No Plateau Age
Total Integrated Age ±2σ				32.3577	0.0286387									K2O wt. %=5.13
No Isochron Age ±2σ
(40Ar/36Ar)trapped ±2σ				281.97	1.71048
	Sample:	BGMN-03			Identifier:	69535
	Material:	GroundmassConcentrate
	Weight:	9.1 mg
pX	01A	ok	0.5	49.8235	1.06457	0.521874	0.0189188	122.793	9.69268	0.526304	15.2557	5.16963	0.111968	0.011871	5e-16	0.0295176	0.000129848	0.0028677	9.78205e-06	101.489	0.0485651	2.99538	0.0130861	0.199587	0.00845534	0.649719	0.0233619	0.2918	0.000982216	101.313	0.0355153	2.78539	0.00941457	0.0490711	0.00577522	0.488813	0.015925	0.290088	0.000760382	0.114658	0.0303907	0.0119672	0.00173436	0.00534457	0.0011865	0.0100546	0.00364744	0.00182768	9.85947e-05
X	01B	outlier	0.8	32.4339	0.387038	0.478049	0.00386859	428.089	27.2249	2.61868	23.1318	3.34929	0.0403227	0.0471945	5e-16	0.0691051	0.000101669	0.00260084	8.23531e-06	172.4	0.0539032	11.9092	0.0170969	0.355995	0.00777695	2.8193	0.0224326	0.451699	0.00141144	172.168	0.0416776	11.5714	0.0086009	0.194165	0.00533341	2.66642	0.0160613	0.448029	0.00104323	0.115042	0.0284981	0.0119672	0.00173436	0.00534457	0.0011865	0.0100546	0.00364744	0.00180898	9.24739e-05
X	01C	outlier	1.3	32.2871	0.131735	0.418874	0.00109244	1713.12	151.47	8.9529	47.4177	3.33401	0.0137234	0.142871	5e-16	0.142395	0.000135845	0.00177751	5.66197e-06	253.439	0.0548676	36.0563	0.0334179	0.629901	0.00816707	9.73865	0.0237142	0.462262	0.00142683	253.22	0.0453223	35.3685	0.00927609	0.469458	0.00583235	9.60027	0.0168556	0.458448	0.00104491	0.115424	0.0268052	0.0119672	0.00173436	0.00534457	0.0011865	0.0100546	0.00364744	0.00179036	8.70164e-05
X	01D	outlier	1.6	31.8478	0.0526034	0.510391	0.000875752	7057.6	1418.03	20.356	75.3963	3.28825	0.00547862	0.257203	5e-16	0.229735	0.00019839	0.000827664	3.33599e-06	283.004	0.0556091	64.9003	0.054367	0.898084	0.00807786	14.3862	0.0215177	0.251959	0.000931698	282.782	0.0467807	63.8003	0.0100724	0.728794	0.00539028	14.2238	0.0167404	0.25068	0.000759415	0.115805	0.0253446	0.0119672	0.00173436	0.00534457	0.0011865	0.0100546	0.00364744	0.00177176	8.233e-05
X	01E	outlier	1.9	31.7264	0.0382144	0.625846	0.00115928	7615.58	1534.73	33.4993	85.7848	3.2756	0.00397975	0.296451	5e-16	0.262471	0.000217579	0.000474623	2.43408e-06	285.585	0.0535027	74.7943	0.0601305	1.00515	0.00864923	13.5207	0.0225408	0.152336	0.000681686	285.341	0.0455433	73.5218	0.0114311	0.843614	0.00570039	13.3734	0.0157379	0.152253	0.000592386	0.116187	0.0241529	0.0119672	0.00173436	0.00534457	0.0011865	0.0100546	0.00364744	0.00175311	7.85353e-05
X	01F	outlier	2.2	31.7685	0.0410113	0.589001	0.00136728	3424.72	387.959	43.592	85.7174	3.27999	0.00427113	0.227645	5e-16	0.261912	0.000218779	0.000476926	2.76067e-06	219.768	0.0509106	57.4367	0.0458869	0.81294	0.00832383	11.0281	0.0240143	0.118531	0.000595836	219.538	0.0425016	56.3799	0.0112663	0.650961	0.00537864	10.8787	0.0154254	0.118814	0.000531593	0.116934	0.0227676	0.0119672	0.00173436	0.00534457	0.0011865	0.0100546	0.00364744	0.00171669	7.42329e-05
pX	01G	ok	3	32.0936	0.035879	0.691269	0.00128387	1311.66	38.8009	59.4424	86.8911	3.31385	0.00373728	0.357512	5e-16	0.262788	0.000213003	0.000437096	2.16758e-06	343.994	0.0620129	90.195	0.0709602	1.45979	0.00884258	14.7549	0.0248002	0.168716	0.000730749	343.75	0.0558963	88.6272	0.0122259	1.2939	0.00600529	14.579	0.0175243	0.168376	0.000630425	0.117324	0.0226013	0.0119672	0.00173436	0.00534457	0.0011865	0.0100546	0.00364744	0.0016977	7.38141e-05
	01H	ok	5	32.3913	0.0361835	0.588301	0.000827491	1402.77	33.0591	78.5252	85.7145	3.34485	0.00376962	0.430421	5e-16	0.256813	0.000210555	0.000477146	2.07858e-06	423.759	0.0668326	108.599	0.0869968	1.73917	0.00784267	20.8687	0.0240972	0.228188	0.00085729	423.536	0.0607154	106.69	0.0130429	1.5755	0.00593601	20.6898	0.0161879	0.227107	0.000703843	0.117715	0.0228346	0.0119672	0.00173436	0.00534457	0.0011865	0.0100546	0.00364744	0.00167862	7.46993e-05
	01I	ok	7	32.3903	0.0481298	0.393054	0.000770153	1922.25	134.429	87.1714	84.9683	3.34475	0.00501418	0.19502	5e-16	0.254581	0.000231911	0.000502507	3.29295e-06	193.682	0.049577	49.2198	0.0428386	0.749436	0.00784262	14.149	0.0248063	0.115027	0.000622148	193.402	0.0412751	48.2421	0.0108622	0.57777	0.00521842	14.0054	0.0160435	0.115301	0.000562887	0.118105	0.0234543	0.0119672	0.00173436	0.00534457	0.0011865	0.0100546	0.00364744	0.00165961	7.68384e-05
	01J	ok	10	32.3823	0.0683395	0.272106	0.000690861	1547.05	175.481	91.6114	82.2761	3.34392	0.0071196	0.100146	5e-16	0.246558	0.000275873	0.000594001	4.87788e-06	102.688	0.0477206	25.2853	0.0256157	0.402412	0.0081462	10.4932	0.0243885	0.0741529	0.000488985	102.407	0.0377935	24.6815	0.00926058	0.224316	0.00546004	10.338	0.0165328	0.0748979	0.000451819	0.118453	0.0243094	0.0119672	0.00173436	0.00534457	0.0011865	0.0100546	0.00364744	0.00164266	7.97233e-05
pX	01K	ok	15	32.6535	0.0550346	0.2393	0.000339896	1385.85	68.9271	100	80.6431	3.37218	0.00573434	0.189209	5e-16	0.239626	0.000237504	0.000649535	3.57971e-06	199.612	0.0517253	47.7809	0.045502	0.780028	0.00749411	22.5388	0.0236844	0.15793	0.000681921	199.348	0.0420124	46.7835	0.0103899	0.603828	0.0053216	22.3761	0.0158886	0.157654	0.000585768	0.118843	0.0255707	0.0119672	0.00173436	0.00534457	0.0011865	0.0100546	0.00364744	0.00162365	8.39326e-05
Integrated K/Ca ±2σ						0.454674	0.000982328	SD
No Plateau Age								steps H-J
Total Integrated Age ±2σ				32.2399	0.0386305									K2O wt. %=2.26
Isochron Age ±2σ				31.9497	0.0595726		MSWD = *10.63
(40Ar/36Ar)trapped ±2σ				315.706	2.1985
	Sample:	19L-15			Identifier:	67855
	Material:	GroundmassConcentrate
	Weight:	8.02 mg
	01A	ok	0.8	21.0089	33.4687	0.11245	0.0994806	1.98791	15.8214	0.00321431	7.5334	3.0408	4.87208	5.99582e-05	2.13e-16	0.0247745	0.0167082	0.00312916	0.000366022	0.898426	0.0406093	0.0223251	0.0149707	0.00155893	0.00590101	0.0304221	0.017408	0.0028391	0.000302878	0.884851	0.0296441	0.0243072	0.0147472	0.112547	0.00579884	0.13369	0.0159813	0.00550279	0.000236927	0.459265	0.0277551	0.0289884	0.00239744	0.00413504	0.00109333	0.0053733	0.00690201	0.00266252	0.000188874
	01B	ok	0.8	22.8188	0.259046	3.14343	0.0446799	20.8797	0.97673	5.56051	19.105	3.3044	0.037747	0.103663	2.13e-16	0.0578173	3.26855e-05	0.00273756	5.73685e-06	665.589	0.074963	38.4704	0.0213083	0.930591	0.00558158	1.8723	0.0184763	1.8238	0.00381272	665.616	0.0719982	38.4731	0.0174242	1.04863	0.00547346	1.99057	0.0171387	1.82692	0.00362798	0.446405	0.0208734	0.0289884	0.00239744	0.00413504	0.00109333	0.0053733	0.00690201	0.00235425	0.000121025
	01C	ok	1.6	31.6744	0.0448388	1.7714	0.0183139	57.8452	2.47129	24.4853	71.9696	4.59792	0.00656538	0.353013	2.13e-16	0.15653	6.15308e-05	0.000948526	2.92505e-06	837.221	0.0830149	131.019	0.0497927	1.88911	0.00575348	11.306	0.0182787	0.804483	0.00244743	837.262	0.0802162	131.01	0.0261851	2.00813	0.00564864	11.4267	0.0169255	0.807167	0.00239017	0.445706	0.021374	0.0289884	0.00239744	0.00413504	0.00109333	0.0053733	0.00690201	0.00233749	0.000122594
	01D	ok	1.9	32.8499	0.0306843	1.4737	0.0153293	287.155	85.0306	37.3284	91.4078	4.77011	0.00449574	0.239569	2.13e-16	0.191631	8.22643e-05	0.000290691	2.54093e-06	464.101	0.067029	88.919	0.0359047	1.12521	0.00582667	9.22031	0.0182203	0.143357	0.00117885	464.16	0.0634312	88.9278	0.0206936	1.24031	0.00572317	9.33787	0.0168624	0.145754	0.00116922	0.445345	0.021665	0.0289884	0.00239744	0.00413504	0.00109333	0.0053733	0.00690201	0.00232883	0.000123646
	01E	ok	2.2	32.616	0.0294319	1.54413	0.0162073	3089.96	11016.4	48.0197	93.5797	4.73583	0.00431169	0.199432	2.13e-16	0.197604	9.38163e-05	0.000217189	2.42502e-06	374.667	0.0606208	74.0205	0.0330053	0.915107	0.00548149	7.32443	0.0176921	0.0880839	0.000908241	374.727	0.0565019	74.0318	0.0216408	1.03781	0.00537135	7.44177	0.0162903	0.0904437	0.000898225	0.444998	0.0219638	0.0289884	0.00239744	0.00413504	0.00109333	0.0053733	0.00690201	0.00232052	0.000124807
	01F	ok	3	32.511	0.0223193	1.40973	0.0145561	15808.7	212340	63.481	95.3675	4.72046	0.00326953	0.288407	2.13e-16	0.202035	8.69922e-05	0.000156685	1.72601e-06	529.941	0.0662832	107.047	0.0440506	1.31556	0.00564591	11.5997	0.0176543	0.0936642	0.000914306	529.995	0.0624264	107.05	0.0245053	1.44187	0.00553904	11.6859	0.0162492	0.0960318	0.000903951	0.444652	0.0222801	0.0289884	0.00239744	0.00413504	0.00109333	0.0053733	0.00690201	0.00231223	0.000126106
	01K	ok	5	32.2105	0.0211426	0.869534	0.00890131	723.28	368.995	83.7202	93.819	4.67643	0.00309665	0.377533	2.13e-16	0.200626	8.32445e-05	0.000209087	1.5951e-06	698.577	0.0731992	140.151	0.0561715	1.74648	0.00592013	24.5802	0.0175204	0.168626	0.00111354	698.608	0.0685552	140.135	0.0270216	1.87144	0.0058183	24.679	0.0161036	0.170945	0.00109953	0.44167	0.0256575	0.0289884	0.00239744	0.00413504	0.00109333	0.0053733	0.00690201	0.00224074	0.000142517
	01L	ok	7	31.9205	0.042279	0.611684	0.00633149	249.164	124.546	89.9894	90.2354	4.63397	0.00619141	0.116942	2.13e-16	0.194731	0.000109909	0.000330367	3.6406e-06	222.937	0.0516636	43.4204	0.0223093	0.55564	0.00573129	10.8207	0.0179398	0.0835863	0.000811112	222.949	0.0445705	43.4242	0.0168189	0.673871	0.00562604	10.9079	0.0165589	0.0858531	0.000796579	0.441314	0.0261264	0.0289884	0.00239744	0.00413504	0.00109333	0.0053733	0.00690201	0.0022322	0.000145015
	01M	ok	10	32.1683	0.0497138	0.586157	0.00612131	280.123	215.655	94.7188	89.2848	4.67025	0.00728115	0.0882206	2.13e-16	0.191182	0.000134642	0.000362539	4.13554e-06	171.305	0.0493738	32.7571	0.0210208	0.419623	0.00595699	8.51722	0.0180973	0.0699259	0.000707892	171.303	0.0416015	32.7616	0.018105	0.539536	0.0058558	8.63327	0.0167294	0.0721816	0.000691193	0.440969	0.0265911	0.0289884	0.00239744	0.00413504	0.00109333	0.0053733	0.00690201	0.00222393	0.000147523
	01N	ok	15	32.2422	0.0510449	0.446579	0.00461002	5095.22	58659.6	100	90.8861	4.68108	0.0074764	0.0985124	2.13e-16	0.194161	0.000126913	0.000308347	4.43383e-06	188.354	0.05426	36.5861	0.0214235	0.459828	0.00545123	12.481	0.0180517	0.0695416	0.000834595	188.335	0.0470266	36.5912	0.0181713	0.579596	0.00534047	12.6043	0.0166801	0.0717916	0.000820118	0.440623	0.0270674	0.0289884	0.00239744	0.00413504	0.00109333	0.0053733	0.00690201	0.00221564	0.000150124
Integrated K/Ca ±2σ						1.08102	0.0220998	SD
No Plateau Age
Total Integrated Age ±2σ				31.7415	0.0376225									K2O wt. %=1.87
No Isochron Age ±2σ
(40Ar/36Ar)trapped ±2σ				267.372	1.04004
	Sample:	19L-14			Identifier:	67495
	Material:	Hornblende
	Weight:	7.28 mg
	01A	ok	1.5	31.3917	0.894531	0.256409	0.000934758	-18581.4	73853.3	3.71736	10.2179	4.60786	0.132434	0.0263256	2.13e-16	0.0221751	4.82873e-05	0.00303831	8.46832e-06	395.591	0.0660309	8.78082	0.01904	0.329854	0.00822728	8.85831	0.0259119	1.20582	0.00334337	396.697	0.0602673	8.68616	0.0154883	0.404736	0.00548675	8.83827	0.0169496	1.18061	0.00313883	1.17668	0.0269802	0.0295414	0.0107835	0.00558506	0.00613055	0.0259262	0.0195994	0.00506308	0.000216558
	01B	ok	2	32.5942	0.177914	0.0913539	0.000115452	1452	228.461	11.1456	58.3327	4.78595	0.0263571	0.0526054	2.13e-16	0.121891	0.000144832	0.00140993	1.03139e-05	143.819	0.048311	17.5834	0.0199157	0.304947	0.00831059	49.6751	0.0270574	0.224681	0.0014442	144.899	0.0410753	17.441	0.0164603	0.380803	0.00561091	49.7061	0.0186539	0.224107	0.001384	1.18703	0.0254318	0.0295414	0.0107835	0.00558506	0.00613055	0.0259262	0.0195994	0.00506405	0.0002042
	01C	ok	2.5	32.5349	0.0944302	0.0849273	6.30625e-05	1439.49	120.07	24.9108	74.8121	4.77716	0.0139889	0.0974822	2.13e-16	0.156617	0.000113907	0.000852169	7.01678e-06	207.421	0.0511832	32.5915	0.0220067	0.528842	0.00811523	99.0017	0.0285711	0.220435	0.00129651	208.558	0.045174	32.3591	0.0186821	0.6068	0.00531727	98.9782	0.0207887	0.219977	0.00123935	1.19725	0.0240629	0.0295414	0.0107835	0.00558506	0.00613055	0.0259262	0.0195994	0.00506501	0.000193337
	01D	ok	3	32.5697	0.0855213	0.0875276	5.73239e-05	1387.18	102.163	40.2719	79.7222	4.78232	0.0126694	0.108785	2.13e-16	0.166717	0.000105737	0.000685976	6.8289e-06	217.448	0.0480445	36.3665	0.0212862	0.585212	0.00826591	107.18	0.0294687	0.196461	0.00130133	218.579	0.0422514	36.1123	0.0177609	0.656369	0.00554451	107.16	0.0220061	0.196614	0.00124757	1.20756	0.0228712	0.0295414	0.0107835	0.00558506	0.00613055	0.0259262	0.0195994	0.00506598	0.000183961
X	01E	outlier	3.5	31.4752	0.0966453	0.0924875	6.66276e-05	1637.07	160.566	53.6308	72.2392	4.62022	0.0143088	0.0946051	2.13e-16	0.156368	0.000107631	0.000939244	7.19083e-06	201.62	0.0481518	31.6205	0.0201608	0.504679	0.0081561	88.1968	0.0281841	0.228291	0.00132439	202.769	0.0428888	31.3964	0.0165241	0.581973	0.00537943	88.1868	0.0202536	0.227641	0.00126885	1.21804	0.0218894	0.0295414	0.0107835	0.00558506	0.00613055	0.0259262	0.0195994	0.00506697	0.00017634
pX	01F	ok	4	32.2499	0.0752163	0.084173	4.91195e-05	1505.21	100.207	71.7634	85.3317	4.73495	0.0111409	0.128412	2.13e-16	0.180234	0.000103685	0.000496109	6.52488e-06	237.432	0.0510683	42.9336	0.0224545	0.669372	0.00803753	131.517	0.031165	0.175852	0.00127692	238.597	0.0464711	42.6367	0.0189755	0.746834	0.00519791	131.502	0.0242305	0.176513	0.00122681	1.2284	0.0211757	0.0295414	0.0107835	0.00558506	0.00613055	0.0259262	0.0195994	0.00506794	0.000170935
pX	01G	ok	4.5	31.9488	0.164849	0.0860337	9.29316e-05	1559.88	239.502	80.2956	52.4321	4.69035	0.024413	0.060423	2.13e-16	0.111794	0.000113907	0.00160964	8.61583e-06	180.111	0.0465105	20.2005	0.0197542	0.35685	0.00866061	60.5357	0.0266851	0.316629	0.00149639	181.256	0.0416285	20.0525	0.0162342	0.434384	0.0061174	60.5467	0.0181096	0.313752	0.0014318	1.23879	0.0207436	0.0295414	0.0107835	0.00558506	0.00613055	0.0259262	0.0195994	0.00506892	0.000167851
X	01H	outlier	5	31.0335	0.269451	0.0980396	0.00043963	895.72	310.194	82.3105	74.1591	4.55483	0.039884	0.0142694	2.13e-16	0.162829	0.000686261	0.00087426	1.90307e-05	29.2041	0.0361307	4.7685	0.0191477	0.0861182	0.00808754	12.5434	0.0246301	0.0310705	0.000548376	30.3548	0.029674	4.70857	0.0156375	0.159097	0.0052749	12.5369	0.0149167	0.0353604	0.000507315	1.24863	0.0206126	0.0295414	0.0107835	0.00558506	0.00613055	0.0259262	0.0195994	0.00506984	0.000167206
pX	01I	ok	5.5	32.5169	0.276629	0.0855074	0.000261337	1388.32	539.371	85.1127	62.3718	4.77449	0.0409797	0.0198446	2.13e-16	0.130645	0.000374812	0.00127323	1.68513e-05	50.6188	0.0375461	6.63456	0.0183112	0.113739	0.00813853	19.9978	0.02569	0.0732789	0.000841003	51.7938	0.0312859	6.56084	0.0146097	0.182854	0.00535275	19.9915	0.0166084	0.0765128	0.000800655	1.25849	0.0207582	0.0295414	0.0107835	0.00558506	0.00613055	0.0259262	0.0195994	0.00507077	0.000168807
pX	01J	ok	6	32.4862	0.290984	0.0849231	0.000194204	1814.84	666.907	88.919	44.8103	4.76994	0.0431055	0.0269548	2.13e-16	0.0939478	0.000198797	0.00186759	1.28997e-05	95.6096	0.0425521	9.01189	0.0185579	0.164876	0.00799088	27.3452	0.026568	0.190633	0.00121706	96.7934	0.0368926	8.91971	0.0148994	0.237954	0.00512548	27.3565	0.0179366	0.190922	0.0011661	1.26886	0.0212041	0.0295414	0.0107835	0.00558506	0.00613055	0.0259262	0.0195994	0.00507174	0.000172851
pX	01K	ok	6.5	32.5825	0.188901	0.0815793	0.000120948	1559.27	316.235	95.1364	55.7453	4.78421	0.0279846	0.0440309	2.13e-16	0.116527	0.000163401	0.0014975	1.03752e-05	125.918	0.0446617	14.7231	0.0198495	0.255877	0.00836486	46.4918	0.0277162	0.209096	0.00126718	127.126	0.0389076	14.5928	0.0164123	0.338522	0.00569098	46.4652	0.0195973	0.20892	0.00121337	1.2792	0.0219286	0.0295414	0.0107835	0.00558506	0.00613055	0.0259262	0.0195994	0.00507271	0.000179122
X	01L	outlier	7	31.4689	0.326636	0.0857861	0.000543842	2275.81	2981.94	96.5454	88.3464	4.61929	0.0483599	0.00997802	2.13e-16	0.191275	0.00117731	0.000394059	2.51077e-05	17.3844	0.0362883	3.33586	0.0192435	0.0482793	0.00842637	10.0175	0.0257828	0.0112771	0.000430901	18.5923	0.0281869	3.29423	0.015757	0.123506	0.00578102	9.99989	0.0167516	0.0160677	0.000376096	1.28904	0.0228549	0.0295414	0.0107835	0.00558506	0.00613055	0.0259262	0.0195994	0.00507364	0.000186973
X	01M	outlier	10	30.5924	0.258004	0.0942173	0.000414957	1507.02	848.865	98.5964	80.2273	4.48955	0.0381803	0.0145251	2.13e-16	0.178715	0.000742701	0.000668863	1.99449e-05	27.085	0.0369458	4.85454	0.0189896	0.0765454	0.00795982	13.2755	0.0264393	0.0239828	0.000532138	28.3177	0.0281024	4.79273	0.0154463	0.152866	0.00507691	13.298	0.0177455	0.0284554	0.000479854	1.29888	0.0239843	0.0295414	0.0107835	0.00558506	0.00613055	0.0259262	0.0195994	0.00507456	0.000196434
X	01N	outlier	15	29.8791	0.355106	0.143515	0.00104206	-7328.6	29791.7	100	75.73	4.38402	0.0525294	0.00993972	2.13e-16	0.172757	0.00106738	0.000821082	2.59384e-05	19.1738	0.0391512	3.3184	0.0193074	0.0412339	0.00808802	5.96309	0.0257498	0.0183778	0.000494518	20.3996	0.0298888	3.28216	0.0158339	0.126088	0.00527564	5.96374	0.0167009	0.0229946	0.000435083	1.30871	0.0252879	0.0295414	0.0107835	0.00558506	0.00613055	0.0259262	0.0195994	0.00507549	0.000207266
Integrated K/Ca ±2σ						0.0929224	9.00227e-05	SD
No Plateau Age								steps A-D
Total Integrated Age ±2σ				32.1372	0.101934									K2O wt. %=0.71
Isochron Age ±2σ				32.4528	0.154837		MSWD = *3.01
(40Ar/36Ar)trapped ±2σ				294.583	1.48722
	Sample:	19L-16			Identifier:	67857
	Material:	GroundmassConcentrate
	Weight:	8.67 mg
X	01A	outlier	0.8	19.4626	0.744668	0.679772	0.0077175	27.8557	4.16757	2.07082	6.32083	2.81154	0.108146	0.039185	2.13e-16	0.0224818	2.37177e-05	0.00317019	6.23363e-06	700.537	0.0723951	15.7514	0.0165262	0.646505	0.00555981	3.52178	0.0171193	2.22408	0.00436072	700.537	0.068778	15.7258	0.0156401	0.761464	0.00545125	3.65281	0.0156663	2.2273	0.00411938	0.417418	0.0225972	0.0289884	0.00239744	0.00413504	0.00109333	0.0053733	0.00690201	0.00227441	0.000148361
X	01B	outlier	1.3	32.0432	0.114196	0.791129	0.00821121	64.8675	7.17852	8.62504	51.1248	4.64488	0.0166988	0.124022	2.13e-16	0.110069	5.61673e-05	0.00165396	5.47481e-06	452.879	0.0606789	49.8499	0.0245208	0.799059	0.00554154	9.57632	0.0175395	0.757859	0.00247722	452.821	0.0567737	49.7944	0.0200198	0.909445	0.00543262	9.70447	0.0161244	0.760452	0.00242596	0.412248	0.0214167	0.0289884	0.00239744	0.00413504	0.00109333	0.0053733	0.00690201	0.00227296	0.000139747
X	01C	outlier	1.6	34.2399	0.0390889	0.734639	0.00753505	-518.63	274.728	20.8249	83.68	4.9663	0.0057228	0.230851	2.13e-16	0.168499	6.558e-05	0.000552223	2.91771e-06	550.661	0.0675342	92.7927	0.034209	1.17627	0.00601675	19.1923	0.0186142	0.321761	0.00160587	550.62	0.06432	92.6963	0.0233212	1.29152	0.00591658	19.3229	0.0172873	0.324169	0.00158761	0.407231	0.0205864	0.0289884	0.00239744	0.00413504	0.00109333	0.0053733	0.00690201	0.00227155	0.00013316
X	01D	outlier	1.9	33.8996	0.0300629	0.701557	0.00718974	-267.812	66.7	34.1727	89.5719	4.91648	0.00440054	0.252573	2.13e-16	0.182191	6.86966e-05	0.000352824	2.3803e-06	557.198	0.0680824	101.526	0.0361342	1.24972	0.00593358	21.9844	0.0193537	0.216843	0.00132557	557.151	0.0650467	101.413	0.0242893	1.36347	0.00583198	22.0998	0.0180811	0.219206	0.00131251	0.402172	0.0201032	0.0289884	0.00239744	0.00413504	0.00109333	0.0053733	0.00690201	0.00227013	0.000128562
X	01E	outlier	2.2	34.035	0.026421	0.755372	0.00774219	-324.845	98.2523	46.4614	92.027	4.93629	0.00386773	0.232533	2.13e-16	0.186434	7.08499e-05	0.000269739	2.07797e-06	501.316	0.0633321	93.4674	0.0334291	1.14529	0.00547205	18.7953	0.0168007	0.152541	0.00104111	501.256	0.0600901	93.3703	0.0226851	1.26246	0.00536171	18.876	0.0153175	0.154876	0.00102922	0.396995	0.0200032	0.0289884	0.00239744	0.00413504	0.00109333	0.0053733	0.00690201	0.00226868	0.000126212
X	01F	outlier	3	33.1284	0.0257797	0.945861	0.0096796	-370.913	85.9165	67.1409	88.8554	4.80361	0.00377197	0.391307	2.13e-16	0.184981	6.14936e-05	0.000377072	2.03644e-06	850.241	0.0823971	157.271	0.0499063	1.94533	0.00569887	25.2562	0.0178896	0.34387	0.00173069	850.229	0.0798587	157.098	0.0273132	2.0694	0.00559301	25.3675	0.0165046	0.346297	0.00171261	0.391957	0.0202947	0.0289884	0.00239744	0.00413504	0.00109333	0.0053733	0.00690201	0.00226726	0.00012634
	01G	ok	5	32.897	0.0286375	1.26346	0.0129784	6150.65	26233.6	85.1896	85.8363	4.76975	0.0041896	0.341525	2.13e-16	0.179964	6.1137e-05	0.000479246	2.20256e-06	762.761	0.0748501	137.249	0.044566	1.73712	0.00568664	16.5009	0.0186937	0.380752	0.00167933	762.716	0.0718506	137.107	0.0237553	1.85144	0.00558055	16.6177	0.0173728	0.383179	0.00165713	0.38678	0.020977	0.0289884	0.00239744	0.00413504	0.00109333	0.0053733	0.00690201	0.00226581	0.000128944
	01H	ok	7	32.7857	0.0824439	1.00345	0.0111243	535.506	858.181	88.8063	75.1387	4.75348	0.0120606	0.0684373	2.13e-16	0.158074	0.000117614	0.000841277	5.97496e-06	174.013	0.0473026	27.5051	0.0190371	0.365405	0.00545147	4.16235	0.0177921	0.150228	0.00103877	173.941	0.0418752	27.4765	0.0171057	0.481097	0.00534071	4.24394	0.0163988	0.152557	0.00102602	0.381652	0.0219999	0.0289884	0.00239744	0.00413504	0.00109333	0.0053733	0.00690201	0.00226437	0.000133854
	01I	ok	10	32.8997	0.117569	1.0412	0.0127721	-426.324	894.509	91.1007	71.9913	4.77015	0.0172	0.043416	2.13e-16	0.150923	0.000151535	0.000947792	8.23936e-06	115.623	0.0458268	17.4487	0.0160879	0.229993	0.00570858	2.54442	0.0171507	0.11193	0.00095149	115.529	0.0394631	17.4298	0.0149553	0.348234	0.0056029	2.63198	0.0157006	0.114248	0.000938681	0.376614	0.0232972	0.0289884	0.00239744	0.00413504	0.00109333	0.0053733	0.00690201	0.00226295	0.000140698
	01J	ok	15	33.0259	0.0630638	1.03922	0.0107799	406.452	215.92	100	70.779	4.78862	0.00922671	0.168397	2.13e-16	0.14781	6.89204e-05	0.00098882	4.14263e-06	457.91	0.0635181	67.6781	0.0300982	0.91897	0.0057163	9.88611	0.0178846	0.461901	0.00189571	457.831	0.0584612	67.6129	0.0204043	1.03558	0.00561077	9.98077	0.0164991	0.46436	0.0018672	0.371583	0.0248363	0.0289884	0.00239744	0.00413504	0.00109333	0.0053733	0.00690201	0.00226154	0.000149258
Integrated K/Ca ±2σ						1.14666	0.0235387	SD
Plateau Age ±2σ				32.9066	0.0679051	n=4/10	MSWD = 1.95	steps G-J
Total Integrated Age ±2σ				33.0569	0.0420718									K2O wt. %=1.89
Isochron Age ±2σ				32.8433	0.114712		MSWD = 2.48
(40Ar/36Ar)trapped ±2σ				298.088	4.18956
	Sample:	18L-23			Identifier:	67809
	Material:	Biotite
	Weight:	2.51 mg
pX	01A	ok	0.5	28.9693	1.42983	24.0291	32.3767	32.9238	53.1621	0.393851	9.22572	4.20252	0.209068	0.0228818	2.13e-16	0.0219529	0.000171105	0.00307189	1.44232e-05	121.086	0.0451355	2.65712	0.0206859	0.10729	0.00867968	0.0177088	0.0236864	0.371978	0.00174078	120.79	0.0380271	2.65811	0.014782	0.207853	0.00565918	0.139481	0.0159053	0.372877	0.00172262	0.171561	0.0243136	0.0277187	0.0143462	0.00181511	0.00658107	0.0113994	0.0175518	0.00156158	0.000155279
pX	01B	ok	0.8	31.1579	0.125951	83.5927	71.5304	94.7743	81.4909	2.53011	77.1565	4.52273	0.0184385	0.124111	2.13e-16	0.170601	0.000275303	0.000772989	9.63299e-06	84.5153	0.043092	14.4121	0.0220642	0.196583	0.00870944	0.0281024	0.0234498	0.0653531	0.000813157	84.2162	0.036453	14.3848	0.0159251	0.304203	0.00570472	0.123552	0.0155508	0.0667823	0.000797884	0.172006	0.0229803	0.0277187	0.0143462	0.00181511	0.00658107	0.0113994	0.0175518	0.00154599	0.000146219
pX	01C	ok	1	31.0104	0.0579462	63.1447	25.9581	48.1503	13.4476	5.93641	92.3178	4.50114	0.0084823	0.197897	2.13e-16	0.205104	0.000223779	0.000259889	4.75384e-06	112.092	0.0436416	22.9804	0.023418	0.315043	0.008869	0.0589517	0.0237705	0.0291848	0.000532307	111.777	0.0377896	22.9389	0.0168265	0.41245	0.00594548	0.139279	0.0160303	0.0306713	0.000512983	0.17245	0.0218296	0.0277187	0.0143462	0.00181511	0.00658107	0.0113994	0.0175518	0.00153045	0.000137896
pX	01D	ok	1.5	31.085	0.0228774	61.0237	7.52441	57.6284	5.89311	16.733	96.1183	4.51206	0.00334898	0.627257	2.13e-16	0.213031	0.000105516	0.00013127	1.77723e-06	342.066	0.057865	72.8387	0.0338841	0.973073	0.00846478	0.193196	0.023305	0.0450773	0.000607505	341.79	0.0539648	72.7334	0.0204664	1.07694	0.00532373	0.279208	0.0153316	0.0465115	0.000591886	0.172896	0.0208843	0.0277187	0.0143462	0.00181511	0.00658107	0.0113994	0.0175518	0.00151487	0.000130398
	01E	ok	1.9	31.2151	0.0176961	74.8841	8.41734	58.8416	4.62486	31.7129	98.0035	4.53111	0.00259069	0.870295	2.13e-16	0.216296	9.33283e-05	6.74712e-05	1.23505e-06	467.439	0.0663343	101.061	0.0411415	1.34189	0.00872221	0.219306	0.0239983	0.0317382	0.000576877	467.16	0.0631912	100.909	0.0233898	1.45025	0.00572419	0.330822	0.0163662	0.0331863	0.000562178	0.173341	0.0201767	0.0277187	0.0143462	0.00181511	0.00658107	0.0113994	0.0175518	0.00149926	0.000123897
	01F	ok	2.1	31.1764	0.0212919	133.252	37.7113	56.0692	6.00953	42.0003	97.8854	4.52543	0.00311705	0.597673	2.13e-16	0.216307	0.000109818	7.14675e-05	1.53236e-06	320.997	0.0550525	69.4032	0.0331415	0.92564	0.00870956	0.0860914	0.0233989	0.0230214	0.000491413	320.734	0.0513937	69.3048	0.0215865	1.03643	0.00570491	0.215127	0.0154739	0.0244722	0.000475872	0.173786	0.019735	0.0277187	0.0143462	0.00181511	0.00658107	0.0113994	0.0175518	0.0014837	0.000118584
	01G	ok	2.5	31.1898	0.0202519	105.997	21.4647	56.6101	5.36417	53.6093	98.0697	4.5274	0.00296481	0.674455	2.13e-16	0.21662	0.000104092	6.523e-05	1.46766e-06	361.711	0.0632587	78.3193	0.035026	1.04325	0.00856629	0.121141	0.0237329	0.0237064	0.000530415	361.422	0.060154	78.1875	0.0220746	1.15214	0.00548369	0.242942	0.0159745	0.0251378	0.000516804	0.174229	0.0195746	0.0277187	0.0143462	0.00181511	0.00658107	0.0113994	0.0175518	0.00146818	0.00011461
	01H	ok	3.5	31.2232	0.0151685	60.5622	4.51441	54.8152	3.26539	72.0068	98.3075	4.53229	0.00222065	1.06885	2.13e-16	0.216911	8.42216e-05	5.71841e-05	9.86594e-07	572.456	0.067195	124.117	0.0458848	1.65728	0.00856515	0.33146	0.0240254	0.0330365	0.000564343	572.165	0.0642411	123.914	0.0234137	1.76164	0.00548191	0.411267	0.0164058	0.0344355	0.000551872	0.174678	0.0197038	0.0277187	0.0143462	0.00181511	0.00658107	0.0113994	0.0175518	0.00145248	0.000112078
	01I	ok	4	31.1884	0.0263697	85.2042	25.3704	51.1628	8.20562	78.2765	98.475	4.5272	0.00386044	0.364256	2.13e-16	0.217525	0.000145321	5.15147e-05	1.75753e-06	194.539	0.0475385	42.2983	0.0262886	0.568235	0.00878757	0.0808677	0.0234568	0.0100963	0.000341256	194.247	0.0430728	42.2239	0.0178634	0.669367	0.00582331	0.205014	0.0155613	0.011518	0.000321971	0.175122	0.0201158	0.0277187	0.0143462	0.00181511	0.00658107	0.0113994	0.0175518	0.00143692	0.000111148
	01J	ok	5	31.2122	0.0205312	85.1405	15.2662	61.2865	7.1263	88.7663	98.4449	4.53068	0.00300573	0.609428	2.13e-16	0.217291	0.000109795	5.25333e-05	1.42563e-06	325.828	0.0551303	70.7683	0.0336703	0.935527	0.00881559	0.135375	0.0236207	0.0172404	0.000464012	325.541	0.051059	70.6583	0.0209169	1.04411	0.00586551	0.224414	0.0158073	0.0186365	0.000449414	0.175566	0.0207925	0.0277187	0.0143462	0.00181511	0.00658107	0.0113994	0.0175518	0.00142138	0.000111826
	01K	ok	7	31.2003	0.0306674	94.6694	38.0087	48.6854	8.35087	94.1582	98.1841	4.52894	0.00448963	0.31326	2.13e-16	0.216799	0.000162145	6.1358e-05	2.1513e-06	167.863	0.0475887	36.3765	0.025167	0.491406	0.00850286	0.0627485	0.0244799	0.0103583	0.000360449	167.553	0.0423492	36.3129	0.0168717	0.590014	0.00538407	0.16828	0.0170646	0.0117456	0.000341209	0.176009	0.0217079	0.0277187	0.0143462	0.00181511	0.00658107	0.0113994	0.0175518	0.00140586	0.000114078
	01L	ok	10	31.1743	0.0450191	142.658	131.369	48.0901	13.0241	97.575	97.2599	4.52513	0.00659058	0.198506	2.13e-16	0.214939	0.000239976	9.26359e-05	3.05802e-06	107.292	0.042259	23.0509	0.0240773	0.312418	0.00863654	0.0267565	0.023614	0.0099646	0.000327398	106.984	0.0355577	23.0068	0.0175679	0.411468	0.00559279	0.107949	0.0157973	0.0113426	0.000304804	0.176453	0.0228358	0.0277187	0.0143462	0.00181511	0.00658107	0.0113994	0.0175518	0.00139032	0.000117819
	01M	ok	15	31.1765	0.0597351	65.3759	38.8956	60.141	28.6323	100	97.6505	4.52546	0.00874496	0.140886	2.13e-16	0.215786	0.000323158	7.94166e-05	4.01199e-06	75.8492	0.0422881	16.36	0.0227366	0.217004	0.00862486	0.0404994	0.0236222	0.00606038	0.000303557	75.5534	0.0347185	16.3282	0.0165301	0.315787	0.00557473	0.11273	0.0158095	0.00742434	0.000276956	0.176896	0.0241436	0.0277187	0.0143462	0.00181511	0.00658107	0.0113994	0.0175518	0.0013748	0.000122904
Integrated K/Ca ±2σ						82.8253	11.101	SD
Plateau Age ±2σ				31.2037	0.0149776	n=9/13	MSWD = 0.67	steps E-M
Total Integrated Age ±2σ				31.1735	0.0188357									K2O wt. %=5.81
Isochron Age ±2σ				31.1977	0.0204823		MSWD = *3.20
(40Ar/36Ar)trapped ±2σ				292.012	2.59668
	Sample:	19L-13			Identifier:	67805
	Material:	Sanidine
	Weight:	Single Crystal
	01B	ok	3	32.1265	0.00877798	73.347	2.97739	-306.843	52.7531	8.86724	98.2934	4.67664	0.00128905		6e-17	0.210185	4.12109e-05	5.76635e-05	6.36133e-07	1557.17	0.07435	327.04	0.0619464	3.89971	0.0102857	0.282481	0.0108401	0.0904014	0.000990189	1559.92	0.0731927	326.323	0.0386827	3.95072	0.00639053	0.261246	0.00719115	0.101041	0.00095167	2.69256	0.00954938	0.029649	0.0119482	0.012256	0.00598884	0.0206958	0.00470484	0.0108092	0.000239233
	02B	ok	3	31.9967	0.0368253	60.4054	1.7305	-549.393	155.449	18.2194	69.2378	4.65758	0.00540744		6e-17	0.148659	2.84998e-05	0.00104098	2.02057e-06	2322.03	0.118048	344.925	0.0636253	4.5819	0.00955832	0.36031	0.00945026	2.41792	0.00468983	2324.85	0.117125	344.15	0.0440815	4.62805	0.00643164	0.335924	0.00674176	2.41687	0.00417869	2.7478	0.00877325	0.029649	0.0119482	0.012256	0.00598884	0.0206958	0.00470484	0.0110476	0.000217105
X	03B	outlier	3	28.1706	0.00950023	77.4145	7.35	-432.331	167.9	22.8405	99.4761	4.09634	0.0013921		6e-17	0.242849	6.06659e-05	1.76254e-05	7.74398e-07	702.364	0.0533467	170.435	0.0404236	2.0366	0.00961333	0.139602	0.0128709	0.0126828	0.00054309	705.211	0.0514964	170.076	0.0307202	2.08341	0.0064147	0.129016	0.00597038	0.0240881	0.0004768	2.80336	0.0102902	0.029649	0.0119482	0.012256	0.00598884	0.0206958	0.00470484	0.0112873	0.000252071
	04B	ok	3	32.1625	0.00900108	60.8221	3.0363	-337.023	102.45	27.924	99.4761	4.68193	0.00132184		6e-17	0.212474	4.6962e-05	1.7636e-05	5.89959e-07	883.091	0.0596023	187.486	0.0393293	2.23262	0.010626	0.187408	0.00898576	0.0159989	0.000520523	884.851	0.0578356	187.077	0.0274718	2.27219	0.00618228	0.163421	0.00624998	0.0237765	0.000454329	1.70669	0.0112444	0.029649	0.0119482	0.012256	0.00598884	0.0206958	0.00470484	0.00765645	0.00024571
	05B	ok	3	32.1401	0.0354902	73.8193	27.8242	-210.175	209.877	28.7727	98.313	4.67864	0.0052118		6e-17	0.210137	0.000166925	5.69995e-05	2.59339e-06	149.069	0.0268385	31.3002	0.02421	0.370088	0.00989703	0.0258743	0.00953499	0.00855424	0.000385915	150.787	0.0242102	31.2649	0.0180719	0.416202	0.00625092	0.00136487	0.00657701	0.0161025	0.000316576	1.69833	0.00988372	0.029649	0.0119482	0.012256	0.00598884	0.0206958	0.00470484	0.00754685	0.00021653
	06B	ok	3	32.1024	0.00689562	63.6534	2.02568	-409.422	89.1163	37.8834	99.4214	4.67311	0.00101261		6e-17	0.212758	3.90367e-05	1.94896e-05	3.85883e-07	1580.57	0.0753603	336.014	0.0592561	4.0136	0.009806	0.3211	0.00947684	0.0315335	0.000609465	1582.32	0.0742419	335.255	0.0373689	4.05886	0.00618248	0.298467	0.00630283	0.039153	0.000570292	1.68988	0.00897535	0.029649	0.0119482	0.012256	0.00598884	0.0206958	0.00470484	0.00743602	0.000197718
	07B	ok	3	32.1916	0.017188	107.93	23.3321	-374.443	273.885	39.8497	99.1142	4.68621	0.00252415		6e-17	0.211508	7.80817e-05	2.98847e-05	1.31327e-06	343.153	0.0410134	72.5221	0.0253001	0.865794	0.00933354	0.0414053	0.00865608	0.0103465	0.00045016	344.862	0.0394395	72.4059	0.0175839	0.907087	0.00607313	0.0227379	0.00541422	0.0177275	0.000403561	1.6816	0.00868422	0.029649	0.0119482	0.012256	0.00598884	0.0206958	0.00470484	0.00732748	0.000192765
X	08B	outlier	3	32.7645	0.353617	15.3687	12.9441	-57.6067	154.022	39.9303	84.7944	4.77035	0.051947		6e-17	0.177757	0.00126719	0.000514505	2.35342e-05	16.7241	0.0171286	2.97055	0.0209556	0.0341008	0.00919456	0.011584	0.00970982	0.0086309	0.000392802	18.4083	0.0129208	3.03211	0.0126113	0.0773161	0.00554474	-0.0239418	0.00696741	0.0158121	0.000333972	1.67308	0.00906278	0.029649	0.0119482	0.012256	0.00598884	0.0206958	0.00470484	0.00721588	0.000202605
	09B	ok	3	32.0473	0.012542	48.8044	3.47284	-277.609	96.4291	43.089	99.6629	4.66502	0.00184172		6e-17	0.213645	6.86656e-05	1.13145e-05	7.72304e-07	545.719	0.0497493	116.498	0.0358481	1.38172	0.00942946	0.144486	0.0100242	0.00650371	0.000420772	547.42	0.0478383	116.291	0.0267253	1.42189	0.00580878	0.117126	0.0064751	0.0137519	0.000352354	1.66487	0.010007	0.029649	0.0119482	0.012256	0.00598884	0.0206958	0.00470484	0.00710827	0.0002246
	10B	ok	3	32.0647	0.00903032	58.0245	2.68626	-436.312	137.424	48.643	99.5124	4.66757	0.00132606		6e-17	0.213206	4.90336e-05	1.64084e-05	5.60375e-07	961.528	0.0653932	204.841	0.0448655	2.4483	0.00895402	0.214166	0.00949657	0.0162656	0.000538316	963.208	0.0642202	204.383	0.0252006	2.48484	0.00561572	0.183526	0.00711464	0.0232861	0.000487218	1.63378	0.00981532	0.029649	0.0119482	0.012256	0.00598884	0.0206958	0.00470484	0.00690066	0.000218944
	11B	ok	3	32.0219	0.00851223	64.2582	3.30663	-330.724	82.7229	54.183	99.7816	4.66128	0.00124996		6e-17	0.214071	5.19701e-05	7.29916e-06	3.83784e-07	955.217	0.0643022	204.322	0.047528	2.43045	0.00944251	0.193228	0.00955229	0.00741008	0.000365879	956.88	0.0629963	203.881	0.0311935	2.47004	0.00608144	0.170219	0.00641821	0.0143603	0.000301526	1.62265	0.00918533	0.029649	0.0119482	0.012256	0.00598884	0.0206958	0.00470484	0.00686096	0.000202285
	12B	ok	3	32.1052	0.0151587	57.637	7.48125	-204.075	80.3367	56.1627	99.645	4.67351	0.00222605		6e-17	0.213218	8.01744e-05	1.19221e-05	9.84918e-07	342.708	0.0327707	73.0139	0.0265219	0.85968	0.0092753	0.0768171	0.00976795	0.00425882	0.000336732	344.348	0.0305099	72.8861	0.0180537	0.905301	0.00573028	0.0531584	0.00696077	0.0111548	0.000273398	1.61145	0.00891347	0.029649	0.0119482	0.012256	0.00598884	0.0206958	0.00470484	0.00682104	0.000192473
	13B	ok	3	32.1911	0.00700744	50.3492	1.30114	-320.832	55.6046	64.9198	99.6288	4.68613	0.00102908		6e-17	0.212609	4.10092e-05	1.24705e-05	3.52755e-07	1520.29	0.0821585	322.972	0.0595463	3.84139	0.00964291	0.388069	0.00905685	0.0198448	0.000535823	1521.94	0.0810518	322.232	0.0374317	3.8798	0.00587394	0.370718	0.00610087	0.0268505	0.000496135	1.60046	0.00903123	0.029649	0.0119482	0.012256	0.00598884	0.0206958	0.00470484	0.00678185	0.000190654
	14B	ok	3	32.1698	0.0136479	43.0613	3.5327	-242.251	87.3618	67.5098	99.3715	4.68301	0.00200425		6e-17	0.212202	7.27561e-05	2.1176e-05	8.59522e-07	450.517	0.0436013	95.5252	0.031377	1.13048	0.00928309	0.13389	0.0107567	0.00984588	0.000386373	452.148	0.0420124	95.3343	0.0226898	1.17106	0.00621349	0.109286	0.00678909	0.0166741	0.000327859	1.58913	0.00953676	0.029649	0.0119482	0.012256	0.00598884	0.0206958	0.00470484	0.00674142	0.000197113
	15B	ok	3	32.1513	0.00945131	60.6081	3.9072	-360.034	123.562	71.7688	99.9113	4.68028	0.00138795		6e-17	0.213479	5.55846e-05	2.90838e-06	4.79489e-07	736.37	0.0559973	157.075	0.0390218	1.87042	0.00946798	0.157219	0.00982265	0.0024994	0.000352298	737.98	0.0544315	156.739	0.0294377	1.91155	0.00623341	0.137698	0.00649654	0.00937234	0.000278032	1.57804	0.010354	0.029649	0.0119482	0.012256	0.00598884	0.0206958	0.00470484	0.00670189	0.000210875
	16B	ok	3	32.1173	0.0155295	49.1447	4.33708	-963.457	1709.42	73.9639	99.4447	4.6753	0.0022805		6e-17	0.212708	7.70739e-05	1.87002e-05	1.09767e-06	380.922	0.0362482	80.9613	0.0282716	0.974622	0.00980771	0.0995797	0.00859936	0.00735289	0.000417606	382.524	0.0331855	80.8193	0.0214318	1.01195	0.00616159	0.0752342	0.00572482	0.0140545	0.000345406	1.5672	0.0113955	0.029649	0.0119482	0.012256	0.00598884	0.0206958	0.00470484	0.00666325	0.000230176
	17B	ok	3	32.117	0.0109225	53.2469	3.66694	-279.771	88.3361	77.7397	99.4878	4.67525	0.00160397		6e-17	0.212803	5.50855e-05	1.72399e-05	7.56729e-07	654.901	0.0548046	139.255	0.0340276	1.6526	0.0100968	0.158252	0.0106035	0.0116505	0.000494919	656.495	0.0529427	138.958	0.0250041	1.69412	0.006271	0.131258	0.00642354	0.0183418	0.000420771	1.55623	0.012634	0.029649	0.0119482	0.012256	0.00598884	0.0206958	0.00470484	0.00662412	0.000254269
X	18B	outlier	3	32.9244	1.11545	0	0	-17.5935	48.825	77.7644	86.6665	4.79384	0.163875		6e-17	0.180792	0.00386034	0.000451151	7.80471e-05	5.0345	0.0189395	0.909425	0.0191151	0.00797213	0.00956935	-0.00756969	0.0103155	0.00227064	0.000392809	6.57683	0.0104163	0.944221	0.0123053	0.0457477	0.00536057	-0.0200424	0.00695351	0.00882884	0.000284482	1.54098	0.0133145	0.029649	0.0119482	0.012256	0.00598884	0.0206958	0.00470484	0.0065598	0.00026779
	19B	ok	3	32.1833	0.00585879	69.0489	1.5844	-364.152	57.1321	92.0618	99.6056	4.68499	0.000860395		6e-17	0.212612	3.58015e-05	1.3254e-05	2.45373e-07	2482.1	0.122058	527.307	0.0844441	6.28492	0.0108118	0.464086	0.00929606	0.0339492	0.000608596	2483.71	0.120908	526.023	0.0433471	6.33037	0.00703139	0.435724	0.00617847	0.0407926	0.000543247	1.53385	0.0129715	0.029649	0.0119482	0.012256	0.00598884	0.0206958	0.00470484	0.00652424	0.000260881
	20B	ok	3	32.0654	0.0087648	53.7554	1.82987	-331.159	62.6095	100	99.2977	4.66767	0.00128707		6e-17	0.212741	4.87915e-05	2.36745e-05	5.12126e-07	1377.28	0.078415	292.773	0.0648511	3.48697	0.00944692	0.32927	0.0105085	0.0333579	0.000704856	1378.84	0.0771451	292.082	0.0401794	3.52626	0.00565693	0.301759	0.00634956	0.0399094	0.000658326	1.5065	0.0117402	0.029649	0.0119482	0.012256	0.00598884	0.0206958	0.00470484	0.00638779	0.000236018
Weighted mean K/Ca ±2σ						58.3346	3.91458	SE but if MSWD>1 use SE * sqrt(MSWD)
Weighted mean Age ±2σ				32.1256	0.0341838	n=17/20	MSWD = *33.78
Isochron Age ±2σ				32.1278	0.0207933		MSWD = *35.38
(40Ar/36Ar)trapped ±2σ				292.923	1.18163
	Sample:	19L-13			Identifier:	67301
	Material:	Biotite
	Weight:	2.55 mg
X	01A	outlier	0.5	15.6348	0.363102	35.7234	5.40746	43.0578	10.9029	3.00633	10.5843	2.27193	0.0529891	0.371334	4e-16	0.0465877	4.52879e-05	0.00302591	6.58963e-06	498.266	0.0608823	23.2083	0.0223813	0.599279	0.00905972	0.187342	0.0279881	1.50779	0.00327813	498.613	0.0536643	23.0617	0.0144641	0.689881	0.00494221	0.288888	0.0144821	1.47976	0.00305288	0.575441	0.0260173	0.0369018	0.0134973	0.0116028	0.00629433	0.0324105	0.0188274	0.00327001	0.000172442
X	01B	outlier	0.8	26.2949	0.136453	64.2907	14.9707	32.3159	5.61524	6.4244	45.2562	3.83214	0.0200295	0.422193	4e-16	0.118098	0.000105728	0.00185256	7.21709e-06	223.481	0.0500951	26.3869	0.0228687	0.450973	0.00942847	0.119348	0.0272316	0.414065	0.00161011	223.819	0.0407495	26.2329	0.0151169	0.533999	0.00497272	0.27294	0.0143996	0.408863	0.00154514	0.586788	0.024533	0.034988	0.0127279	0.0113429	0.00592848	0.0314478	0.0177817	0.0033906	0.000162607
X	01C	outlier	1	32.1486	0.0815188	57.1807	9.9578	34.43	5.02677	10.6503	71.9479	4.69277	0.0120042	0.521968	4e-16	0.15332	0.000109716	0.000949261	5.73861e-06	212.824	0.0488758	32.6228	0.0221058	0.495293	0.00918334	0.165519	0.0282819	0.202105	0.00122031	213.148	0.0415146	32.4308	0.0143414	0.584148	0.00525195	0.259413	0.0143632	0.201421	0.00117775	0.598107	0.0232317	0.033079	0.0120538	0.0110836	0.00560149	0.0304875	0.0168909	0.00351089	0.000153987
X	01D	outlier	1.5	33.9481	0.0391742	75.2603	6.87413	34.0278	1.99891	21.0839	83.0893	4.9579	0.00577434	1.28874	4e-16	0.167593	7.09634e-05	0.000572214	2.88537e-06	480.711	0.0562308	80.5458	0.0327592	1.18272	0.00905445	0.312113	0.0276875	0.275222	0.00138654	481.09	0.0493816	80.0717	0.0196475	1.27165	0.00542204	0.42807	0.0144953	0.273144	0.00133795	0.60944	0.0221398	0.0311676	0.0114889	0.0108241	0.00531909	0.029526	0.0161764	0.00363133	0.000146758
	01E	ok	1.7	34.2714	0.0306921	83.7301	7.53759	35.2034	1.98379	32.2468	87.5518	5.00555	0.00452487	1.37882	4e-16	0.174913	7.31284e-05	0.000421192	2.25672e-06	492.786	0.0606927	86.1753	0.0344075	1.24346	0.00895412	0.300848	0.0262308	0.207706	0.00111167	493.173	0.054474	85.6591	0.0218364	1.34323	0.00525229	0.423967	0.0144234	0.20715	0.00107097	0.620802	0.0212899	0.0292514	0.01105	0.0105639	0.00508869	0.0285621	0.015663	0.00375207	0.000141134
	01F	ok	1.9	34.5681	0.0330173	41.9114	1.57974	33.5408	1.34823	46.5276	84.6756	5.04929	0.00486845	1.76393	4e-16	0.167702	5.95146e-05	0.00051853	2.40851e-06	657.534	0.0641498	110.245	0.0375864	1.61538	0.00838135	0.759116	0.027181	0.341325	0.00158321	657.968	0.0590315	109.604	0.0221189	1.71052	0.00530067	0.888024	0.013891	0.338222	0.00152846	0.642016	0.0204574	0.0256734	0.0106234	0.010078	0.00482463	0.0267623	0.0153122	0.00397753	0.000135642
	01G	ok	2	34.6397	0.034331	26.5447	0.837646	37.3159	2.3307	56.9462	86.7748	5.05986	0.00506236	1.28688	4e-16	0.1715	6.74829e-05	0.000447487	2.58442e-06	469.081	0.0605644	80.43	0.0298743	1.15513	0.00876625	0.870227	0.0257665	0.210336	0.00121189	469.507	0.0552516	79.9659	0.0182566	1.25482	0.00502961	0.984846	0.0137815	0.210069	0.00117104	0.653364	0.0204496	0.0237596	0.0106227	0.00981808	0.00478238	0.0257996	0.0154649	0.00409812	0.000135607
	01H	ok	2.1	34.5929	0.0426912	20.1426	0.796337	34.4102	3.24271	63.2724	87.9569	5.05295	0.00629498	0.781394	4e-16	0.174074	9.71157e-05	0.000407483	3.2304e-06	280.614	0.0515333	48.8373	0.0257177	0.706354	0.00883295	0.694879	0.0263736	0.114689	0.000906127	281.041	0.0447156	48.5393	0.0183615	0.799439	0.00451698	0.792608	0.0148842	0.116529	0.000873413	0.664725	0.0207514	0.0218434	0.0107829	0.00955786	0.00481238	0.0248357	0.0158495	0.00421886	0.000137625
	01I	ok	2.5	34.4731	0.0309343	13.1727	0.251723	34.4636	1.91633	73.7506	89.5133	5.03529	0.00456108	1.29425	4e-16	0.177776	7.50516e-05	0.00035481	2.34425e-06	455.113	0.0600498	80.8917	0.0324171	1.16465	0.00847218	1.75591	0.0282393	0.162347	0.00106655	455.559	0.0542707	80.412	0.0219856	1.26667	0.00486502	1.86441	0.015622	0.163318	0.00102939	0.676073	0.0213491	0.0199296	0.0110965	0.00929797	0.00491323	0.0238731	0.0164489	0.00433945	0.000141604
	01J	ok	3	34.3463	0.0261494	15.5633	0.294807	29.4279	1.31275	86.1144	91.549	5.01659	0.00385531	1.52715	4e-16	0.182497	7.04234e-05	0.000285917	1.99591e-06	523.119	0.0576355	95.4474	0.0352697	1.39805	0.00933031	1.75457	0.0278502	0.150439	0.00104383	523.569	0.0512162	94.9067	0.0234868	1.49019	0.00528394	1.8448	0.0151041	0.151779	0.00100675	0.687575	0.0222326	0.0179897	0.0115584	0.00903453	0.00508344	0.0228972	0.0172531	0.00446168	0.000147477
	01K	ok	3.5	34.5939	0.0461668	9.27016	0.225251	32.6243	3.44523	91.6725	87.2366	5.0531	0.00680747	0.686526	4e-16	0.172644	0.000103836	0.000431859	3.46846e-06	248.589	0.0492934	42.9089	0.0243556	0.626645	0.00919484	1.32146	0.0290459	0.108008	0.0008618	249.045	0.0408306	42.6568	0.0165888	0.720518	0.00463358	1.42031	0.0143804	0.110351	0.000826578	0.699176	0.0233747	0.0160331	0.0121543	0.00876883	0.00531778	0.021913	0.0182381	0.00458497	0.000155063
	01L	ok	5	34.427	0.041001	10.5416	0.303243	41.9985	6.42629	96.963	90.6741	5.02849	0.0060452	0.653472	4e-16	0.180325	0.00011219	0.000315526	3.09426e-06	226.541	0.0523812	40.8428	0.0235816	0.572038	0.00987246	1.10637	0.0296519	0.072026	0.000700597	227.001	0.0435094	40.5872	0.0157484	0.662854	0.0053436	1.18959	0.0152511	0.0752228	0.000664804	0.709283	0.024548	0.0143285	0.0127658	0.00853734	0.0055671	0.0210555	0.0192178	0.00469238	0.000162853
X	01M	outlier	6	34.7828	0.0879752	9.57375	0.767129	86.4544	82.4239	98.6328	93.6566	5.08096	0.0129736	0.20625	4e-16	0.184333	0.000321485	0.000214591	5.85671e-06	69.9465	0.042426	12.8909	0.0210766	0.168617	0.00947065	0.384321	0.0304479	0.0151994	0.000409263	70.4217	0.0311439	12.8097	0.0141111	0.266543	0.00551014	0.459375	0.0146361	0.0196821	0.000362101	0.719249	0.0258445	0.0126477	0.013441	0.00830909	0.00584867	0.0202101	0.0202781	0.00479829	0.000171459
X	01N	outlier	7	33.5179	0.110683	9.07834	0.897415	89.297	119.362	99.8965	94.0209	4.89449	0.016311	0.156079	4e-16	0.1921	0.000446238	0.000202259	7.5345e-06	50.7916	0.0426641	9.75518	0.0211253	0.127162	0.00973048	0.306609	0.0300555	0.0104243	0.000382289	51.2533	0.0283016	9.68871	0.0141338	0.218164	0.00504612	0.383317	0.0150118	0.0151146	0.000327694	0.729201	0.0272577	0.0109692	0.0141766	0.00808116	0.00616036	0.0193658	0.0214163	0.00490405	0.000180838
	01O	ok	15	34.3221	1.22468	10.199	14.1138	-15.6212	45.5682	100	91.9267	5.01302	0.180557	0.0127889	4e-16	0.18338	0.00529719	0.000273135	6.57643e-05	4.35971	0.0413308	0.799325	0.0218094	0.00647547	0.00995091	0.0223667	0.0308485	0.00120162	0.000286075	4.83665	0.0265791	0.764947	0.0134314	0.0963836	0.00519346	0.125221	0.0135369	0.00618618	0.000205058	0.739125	0.0287674	0.00929556	0.0149622	0.00785388	0.00649718	0.0185239	0.0226183	0.00500951	0.000190856
Integrated K/Ca ±2σ						19.5726	0.554652	SD
Total integrated Age ±2σ				33.4751	0.0322042	n=9/15	MSWD = *14.21
Total Integrated Age ±2σ				33.4751	0.0322042									K2O wt. %=12.35
Isochron Age ±2σ				34.1027	0.127543		MSWD = *10.55
(40Ar/36Ar)trapped ±2σ				319.208	7.33592
	Sample:	19L-13			Identifier:	67806
	Material:	Biotite
	Weight:	2.31 mg
pX	01A	ok	0.5	16.3958	0.733053	79.2375	96.3749	46.4453	28.9604	1.68724	6.49582	2.37455	0.106642	0.0911118	2.13e-16	0.0273561	6.00662e-05	0.00316427	8.27798e-06	355.455	0.0606622	9.71983	0.0212772	0.342456	0.00867788	0.0201091	0.0238823	1.12477	0.00293604	355.113	0.0541505	9.70418	0.0151563	0.446447	0.00565643	0.1477	0.0161956	1.12441	0.00288278	0.13926	0.0273427	0.0277187	0.0143462	0.00181511	0.00658107	0.0113994	0.0175518	0.00164614	0.00015408
pX	01B	ok	0.8	27.7158	0.167998	88.8244	73.67	65.1618	33.0605	4.54553	50.167	4.02645	0.0245913	0.154349	2.13e-16	0.124596	0.000174654	0.00168637	9.64341e-06	132.211	0.0464583	16.4659	0.0223432	0.257689	0.00853501	0.0304706	0.0246058	0.222981	0.00127233	131.891	0.0386881	16.4255	0.0159458	0.36195	0.00543469	0.132326	0.0172447	0.224207	0.00125775	0.140056	0.0257217	0.0277187	0.0143462	0.00181511	0.00658107	0.0113994	0.0175518	0.00162455	0.000145145
pX	01C	ok	1	32.0103	0.106203	36.2684	9.61486	41.7061	11.0477	8.11143	74.4489	4.65581	0.0155824	0.19256	2.13e-16	0.159909	0.000189287	0.000864622	7.71392e-06	128.519	0.0460933	20.5425	0.0231712	0.301998	0.00868143	0.0916372	0.02401	0.1112	0.000990317	128.165	0.0392068	20.5078	0.0166642	0.40121	0.00566187	0.178019	0.0163834	0.112607	0.000977712	0.140851	0.0242367	0.0277187	0.0143462	0.00181511	0.00658107	0.0113994	0.0175518	0.00160298	0.000137138
pX	01D	ok	1.5	33.555	0.0496965	24.3727	1.78717	41.2632	4.31413	16.942	83.6167	4.88255	0.00729777	0.476856	2.13e-16	0.17126	0.000102955	0.000554364	3.74191e-06	297.169	0.0560433	50.8717	0.0290288	0.728077	0.00850651	0.336427	0.0242471	0.165036	0.00111129	296.854	0.0511461	50.7811	0.018851	0.831487	0.00538982	0.430429	0.0167289	0.166325	0.00109914	0.141646	0.0229112	0.0277187	0.0143462	0.00181511	0.00658107	0.0113994	0.0175518	0.00158142	0.000130215
p	01E	ok	1.9	33.1707	0.0407148	12.2355	0.362408	39.8547	3.3178	28.0316	87.0926	4.82612	0.00597758	0.598843	2.13e-16	0.180465	9.54862e-05	0.00043673	3.20678e-06	354.154	0.0558354	63.8864	0.0322524	0.908395	0.00876455	0.838363	0.0232188	0.155408	0.0011352	353.842	0.0514208	63.7641	0.0206669	1.00615	0.00578851	0.940594	0.0152001	0.156695	0.00112414	0.142452	0.02176	0.0277187	0.0143462	0.00181511	0.00658107	0.0113994	0.0175518	0.00155955	0.000124489
p	01F	ok	2.1	33.2194	0.0439189	18.3661	1.0815	39.8853	4.50945	36.1411	89.1293	4.83328	0.00644816	0.437914	2.13e-16	0.184412	0.000120296	0.000367804	3.44049e-06	253.438	0.0527112	46.7175	0.0288746	0.660384	0.00875622	0.409121	0.0235925	0.0935774	0.000871452	253.108	0.0483963	46.6348	0.0204967	0.763253	0.00577589	0.502937	0.0157651	0.0949574	0.000860485	0.143206	0.0208871	0.0277187	0.0143462	0.00181511	0.00658107	0.0113994	0.0175518	0.0015391	0.000120475
p	01G	ok	2.5	33.3249	0.0336729	18.4755	0.765213	39.04	2.81788	47.9343	90.9614	4.84877	0.00494413	0.636839	2.13e-16	0.187601	9.63186e-05	0.000305799	2.65212e-06	362.298	0.0601556	67.9392	0.0329896	0.958178	0.00821525	0.591367	0.0236012	0.111314	0.000960416	361.98	0.0566582	67.8177	0.0214984	1.0607	0.0049173	0.654598	0.0157782	0.112636	0.000950117	0.143997	0.0202124	0.0277187	0.0143462	0.00181511	0.00658107	0.0113994	0.0175518	0.00151765	0.00011781
	01H	ok	3.5	33.4002	0.0281077	18.1221	0.523771	42.6533	2.47636	65.1979	91.4018	4.85982	0.00412718	0.932242	2.13e-16	0.188081	8.38199e-05	0.000290896	2.17524e-06	529	0.062952	99.4534	0.0426845	1.38669	0.00872279	0.882319	0.0237201	0.154664	0.00115031	528.71	0.0597545	99.2695	0.0269047	1.48943	0.00572508	1.00442	0.0159555	0.155892	0.00114018	0.144789	0.0198079	0.0277187	0.0143462	0.00181511	0.00658107	0.0113994	0.0175518	0.00149615	0.000116828
	01I	ok	4	33.3795	0.0397094	19.7419	1.13622	43.0083	4.6291	74.2597	89.4767	4.85679	0.00583063	0.489341	2.13e-16	0.184235	0.000107475	0.000356047	3.10724e-06	283.473	0.0529082	52.2037	0.0288412	0.730974	0.00862272	0.425274	0.0239418	0.101306	0.00088033	283.139	0.0491069	52.1088	0.0192871	0.835561	0.00557143	0.519977	0.0162832	0.102605	0.000869663	0.145583	0.0196924	0.0277187	0.0143462	0.00181511	0.00658107	0.0113994	0.0175518	0.00147461	0.000117586
	01J	ok	5	33.4866	0.0454845	22.1807	1.61125	36.7394	3.71644	82.4369	88.1911	4.87251	0.006679	0.441573	2.13e-16	0.181001	0.000114795	0.000399556	3.54962e-06	260.371	0.0520522	47.1077	0.0283441	0.674494	0.00856902	0.341761	0.0244133	0.104336	0.000923698	260.07	0.04811	47.0228	0.0194734	0.779567	0.00548795	0.432015	0.0169688	0.105603	0.000912996	0.146375	0.0198711	0.0277187	0.0143462	0.00181511	0.00658107	0.0113994	0.0175518	0.00145314	0.000120042
	01K	ok	7	33.4937	0.0515398	34.8433	4.5966	46.0671	7.08662	89.2975	87.8893	4.87355	0.0075682	0.370475	2.13e-16	0.180344	0.00013026	0.000409767	4.01411e-06	219.245	0.0492125	39.5226	0.0271263	0.551792	0.0087488	0.183199	0.0238419	0.0900019	0.000879558	218.93	0.0448273	39.4612	0.0190832	0.651816	0.00576464	0.274892	0.016136	0.0912764	0.000868262	0.147129	0.0203071	0.0277187	0.0143462	0.00181511	0.00658107	0.0113994	0.0175518	0.00143268	0.00012387
	01L	ok	10	33.5454	0.0488121	23.4728	1.96808	38.1174	4.45895	96.6803	87.1614	4.88115	0.00716786	0.398672	2.13e-16	0.178571	0.000121638	0.000434403	3.74952e-06	238.274	0.0524817	42.5309	0.0274065	0.607961	0.00863905	0.291592	0.0240931	0.103766	0.000892833	237.961	0.0480858	42.4563	0.0183269	0.703519	0.00559667	0.383857	0.0165049	0.104991	0.000880572	0.147921	0.021026	0.0277187	0.0143462	0.00181511	0.00658107	0.0113994	0.0175518	0.00141121	0.000129308
	01M	ok	15	33.5702	0.0760233	28.0855	6.08953	38.7325	10.2618	100	88.0979	4.88479	0.0111639	0.179267	2.13e-16	0.180356	0.000227245	0.000402708	5.60872e-06	106.082	0.0426402	19.1244	0.0228348	0.272117	0.00870682	0.109718	0.023561	0.0428178	0.000594354	105.762	0.0365642	19.0954	0.0163223	0.370872	0.00570071	0.194357	0.0157179	0.044143	0.000577245	0.148676	0.0219373	0.0277187	0.0143462	0.00181511	0.00658107	0.0113994	0.0175518	0.00139072	0.000135692
Integrated K/Ca ±2σ						21.6047	1.22376	SD
Plateau Age ±2σ				33.4462	0.0576676	n=6/13	MSWD = *2.79	steps H-M
Total Integrated Age ±2σ				32.8954	0.0368021									K2O wt. %=5.40
Isochron Age ±2σ				33.18	0.12		MSWD = *9.08
(40Ar/36Ar)trapped ±2σ				310.6	8.5
	Sample:	19L-13			Identifier:	68416
	Material:	Hornblende
	Weight:	8.0 mg
X	01A	outlier	1.5	27.1345	2.84577	0.344317	0.0156978	24.7051	1.04954	0.21513	6.5117	4.21516	0.445355	0.0025569	2.13e-16	0.0154494	0.000290738	0.00316372	2.22569e-05	57.2015	0.0455041	0.884343	0.0166092	0.20261	0.00589184	0.66583	0.0276236	0.181326	0.00126477	58.1193	0.0382009	0.885026	0.0162585	0.311289	0.00574591	0.762169	0.015245	0.185674	0.00125084	0.93825	0.0247246	0.031327	0.00330901	0.00502248	0.00130318	0.0125403	0.0230359	0.0039909	0.00018975
X	01B	outlier	2	32.6784	0.404847	0.194692	0.00230908	19.1285	0.262287	0.769192	87.0998	5.08408	0.0635497	0.00658523	2.13e-16	0.17146	0.00137306	0.000434118	2.79191e-05	13.2843	0.0383011	2.27937	0.0169818	0.554028	0.00588619	3.03209	0.0278951	0.00743748	0.000369845	14.192	0.0304723	2.27456	0.0166354	0.665895	0.00574012	3.14749	0.0157317	0.0115747	0.000324698	0.974498	0.0232038	0.031327	0.00330901	0.00502248	0.00130318	0.0125403	0.0230359	0.00412304	0.000178523
	01C	ok	2.5	34.3116	0.0842314	0.152063	0.000223637	14.4558	0.0235547	4.88509	91.2842	5.34056	0.0132338	0.0489189	2.13e-16	0.171067	0.000199018	0.000292405	6.71909e-06	98.9106	0.0435641	16.941	0.0181447	5.37283	0.00609898	28.8337	0.0289131	0.0448411	0.000661295	99.8934	0.0376924	16.9477	0.0176508	5.49953	0.00595812	28.9453	0.0174733	0.0491882	0.000640424	1.01175	0.0218429	0.031327	0.00330901	0.00502248	0.00130318	0.0125403	0.0230359	0.00425884	0.000168895
X	01D	outlier	3	33.1255	0.045547	0.153633	8.90515e-05	14.8613	0.00972038	16.9489	91.1163	5.15427	0.00715135	0.143383	2.13e-16	0.176929	8.76346e-05	0.000298002	3.95751e-06	280.313	0.0552177	49.6535	0.0222071	15.3355	0.00663874	83.6352	0.03064	0.129701	0.00109583	281.343	0.0511891	49.69	0.0207164	15.4915	0.00650958	83.7538	0.0202029	0.134354	0.00108479	1.04984	0.0207046	0.031327	0.00330901	0.00502248	0.00130318	0.0125403	0.0230359	0.00439771	0.000161407
	01E	ok	3.5	32.9041	0.0290569	0.161429	7.79492e-05	14.5299	0.00807214	33.0449	98.3875	5.11951	0.00456169	0.191307	2.13e-16	0.19236	8.18185e-05	5.14798e-05	2.60544e-06	344.027	0.0594788	66.242	0.0251369	20.8895	0.00768342	106.183	0.0314917	0.0764832	0.000870604	345.112	0.0560515	66.2936	0.0229569	21.0601	0.00757209	106.291	0.0214727	0.0811592	0.000857524	1.08614	0.0198985	0.031327	0.00330901	0.00502248	0.00130318	0.0125403	0.0230359	0.00453005	0.000156803
	01F	ok	4	32.8468	0.0270995	0.162466	7.48925e-05	15.208	0.00838984	49.086	98.5771	5.11052	0.00425426	0.190654	2.13e-16	0.19307	7.9111e-05	4.50482e-05	2.41576e-06	341.592	0.0633513	66.0151	0.0234828	19.9269	0.00765051	105.129	0.0306236	0.073547	0.00079786	342.702	0.0603079	66.0812	0.0211518	20.0967	0.0075387	105.237	0.0201781	0.0783603	0.000783693	1.12234	0.0193998	0.031327	0.00330901	0.00502248	0.00130318	0.0125403	0.0230359	0.004662	0.000154897
	01G	ok	4.5	32.7148	0.0305505	0.163674	9.14939e-05	15.1522	0.0095827	61.8554	98.5763	5.0898	0.00479567	0.151769	2.13e-16	0.193855	9.01074e-05	4.50637e-05	2.73293e-06	270.824	0.0537149	52.5503	0.0216311	15.9186	0.00698056	83.0567	0.0312444	0.058169	0.000720937	271.977	0.0501549	52.6	0.0199429	16.0796	0.00685784	83.1631	0.0211083	0.063094	0.000704939	1.15874	0.0192296	0.031327	0.00330901	0.00502248	0.00130318	0.0125403	0.0230359	0.00479472	0.000155782
	01H	ok	5	32.5059	0.0375946	0.162976	0.000123645	15.7396	0.0138279	70.5363	98.8352	5.057	0.00590075	0.103176	2.13e-16	0.195627	0.000120269	3.6265e-05	3.31692e-06	182.445	0.046081	35.725	0.0197584	10.4346	0.00655116	56.6963	0.0292966	0.0379759	0.000593969	183.614	0.0417995	35.759	0.018754	10.5772	0.00642024	56.8222	0.0181008	0.0429774	0.000573165	1.19483	0.0193974	0.031327	0.00330901	0.00502248	0.00130318	0.0125403	0.0230359	0.00492628	0.000159388
	01I	ok	5.5	32.5151	0.0474654	0.162127	0.000155887	15.2426	0.0158834	77.135	99.474	5.05845	0.00745008	0.0784276	2.13e-16	0.196836	0.000149244	1.46059e-05	4.25285e-06	137.832	0.0454188	27.1562	0.0183561	8.17855	0.00597161	43.3159	0.0294861	0.0259899	0.00057915	139.029	0.0408311	27.1771	0.0175996	8.3159	0.00582768	43.4205	0.0184059	0.0311111	0.000556048	1.23092	0.0198918	0.031327	0.00330901	0.00502248	0.00130318	0.0125403	0.0230359	0.00505785	0.000165533
	01J	ok	6	32.5788	0.101886	0.157599	0.000408921	15.2483	0.0425248	79.4532	99.152	5.06844	0.0159923	0.027553	2.13e-16	0.195811	0.000393526	2.55305e-05	8.16142e-06	48.6761	0.0400711	9.54102	0.0174177	2.87242	0.00559096	15.6524	0.028731	0.00990335	0.000395378	49.8894	0.0343151	9.56767	0.0170261	2.98949	0.00543696	15.7615	0.0171704	0.0151175	0.000355863	1.26712	0.0206922	0.031327	0.00330901	0.00502248	0.00130318	0.0125403	0.0230359	0.0051898	0.000173976
	01K	ok	6.5	32.8624	0.0819215	0.15634	0.000268915	15.1236	0.0286638	82.7544	95.8114	5.11297	0.0128607	0.039235	2.13e-16	0.187558	0.000237309	0.000138816	7.02966e-06	72.3608	0.0410061	13.5865	0.0152834	4.12418	0.00586453	22.4647	0.0291145	0.0224694	0.000505997	73.6284	0.0347549	13.5926	0.0147737	4.24368	0.00571791	22.5491	0.0178045	0.0278339	0.000472164	1.30326	0.0217623	0.031327	0.00330901	0.00502248	0.00130318	0.0125403	0.0230359	0.00532156	0.000184372
X	01L	outlier	7	33.0243	0.0940985	0.147531	0.000325162	15.1329	0.0388803	85.4286	99.3426	5.13838	0.0147736	0.0317846	2.13e-16	0.193515	0.000343636	1.91106e-05	7.60418e-06	56.8174	0.0395859	11.008	0.0178973	3.33795	0.00615758	19.2824	0.0285412	0.0117484	0.000429687	58.1081	0.032172	11.0217	0.0174972	3.46024	0.0060181	19.3566	0.0168509	0.0172241	0.000383058	1.3394	0.0230652	0.031327	0.00330901	0.00502248	0.00130318	0.0125403	0.0230359	0.00545331	0.000196421
	01M	ok	10	32.7745	0.0458531	0.15227	0.000133258	13.9568	0.0131483	92.6297	98.8217	5.09917	0.00719803	0.0855876	2.13e-16	0.193981	0.000140639	3.67473e-05	4.0504e-06	152.627	0.0484214	29.6395	0.019115	9.71399	0.00613193	50.2988	0.0295953	0.0334784	0.000609398	153.982	0.0417281	29.6667	0.0183071	9.84083	0.00599185	50.4111	0.0185804	0.0391328	0.000573217	1.37554	0.0245642	0.031327	0.00330901	0.00502248	0.00130318	0.0125403	0.0230359	0.00558507	0.000209838
X	01N	outlier	15	32.3935	0.0473468	0.160605	0.000134061	16.0124	0.0150973	100	97.1467	5.03936	0.00743097	0.0875984	2.13e-16	0.192955	0.000126938	9.35012e-05	4.33271e-06	157.043	0.0472239	30.3322	0.0175298	8.71665	0.00598496	48.8013	0.0292608	0.0416794	0.00067274	158.429	0.0392725	30.3473	0.0166223	8.84956	0.00584136	48.895	0.0180428	0.0474785	0.000635367	1.41168	0.0262254	0.031327	0.00330901	0.00502248	0.00130318	0.0125403	0.0230359	0.00571683	0.000224378
Integrated K/Ca ±2σ						0.160468	8.29455e-05	SD
Total integrated Age ±2σ				32.8289	0.0285468	n=9/14	MSWD = *56.01
Total Integrated Age ±2σ				32.8289	0.0285468									K2O wt. %=1.19
Isochron Age ±2σ				32.5013	0.0589576		MSWD = *6.09
(40Ar/36Ar)trapped ±2σ				465.565	24.6526
	Sample:	19L-6B			Identifier:	67493
	Material:	Sanidine
	Weight:	Single Crystal
	01	ok	5	32.716	0.016121	31.5828	0.817629	36479.9	28853.7	10.1096	95.3347	4.81529	0.00239403		6e-17	0.198004	4.66819e-05	0.000157535	1.38498e-06	697.126	0.0465984	137.969	0.0309538	1.70734	0.0112241	0.658592	0.0170491	0.11031	0.000965237	698.754	0.0429835	137.598	0.0253614	1.73995	0.00598956	0.621221	0.0110022	0.117492	0.000946114	1.6078	0.016052	0.0578128	0.0131239	0.0146356	0.00788968	0.0295311	0.0109127	0.00653564	0.000151003
	02	ok	5	32.749	0.0188239	28.6476	0.907	67324.9	110753	18.2395	95.5763	4.8202	0.00279547		6e-17	0.198304	5.6878e-05	0.000149356	1.60785e-06	559.762	0.0527288	110.951	0.0298957	1.36597	0.0105722	0.58384	0.0184838	0.0840383	0.000899728	561.416	0.0496292	110.647	0.0235271	1.39927	0.00548875	0.543431	0.0114964	0.0910812	0.000884018	1.60955	0.0163243	0.0578128	0.0131239	0.0146356	0.00788968	0.0295311	0.0109127	0.00651675	0.000148119
	03	ok	5	32.6532	0.0189241	27.2035	0.88829	27417.6	22486.9	25.4654	97.4048	4.80597	0.00281021		6e-17	0.202697	7.97123e-05	8.74631e-05	1.40726e-06	486.736	0.114946	98.613	0.0308772	1.21752	0.0120208	0.546423	0.0178416	0.0429824	0.000684637	488.375	0.113501	98.3313	0.0254983	1.25117	0.00794703	0.501859	0.011214	0.0499276	0.000668386	1.61129	0.0167348	0.0578128	0.0131239	0.0146356	0.00788968	0.0295311	0.0109127	0.00649792	0.000146366
	04	ok	5	32.7211	0.0209677	28.0296	1.40243	-31683.5	43546.8	30.1007	98.5179	4.81606	0.0031138		6e-17	0.204584	9.21221e-05	4.97888e-05	1.54202e-06	309.354	0.0465946	63.2587	0.0267791	0.759819	0.011667	0.340166	0.017019	0.0156578	0.000476772	310.995	0.042742	63.0567	0.0197451	0.802011	0.00574447	0.293506	0.0108911	0.022349	0.000454518	1.61301	0.0172633	0.0578128	0.0131239	0.0146356	0.00788968	0.0295311	0.0109127	0.00647943	0.000145777
	05	ok	5	32.653	0.0421279	23.8989	1.48016	-91700.2	476241	33.6164	87.6244	4.80594	0.00625595		6e-17	0.182343	0.000101333	0.000418512	3.39774e-06	263.254	0.0620183	47.9804	0.0241153	0.599154	0.0117273	0.30258	0.0187392	0.110393	0.000893864	264.891	0.0585818	47.8082	0.0187915	0.63839	0.00611739	0.253069	0.0109597	0.117453	0.000873536	1.61484	0.0179503	0.0578128	0.0131239	0.0146356	0.00788968	0.0295311	0.0109127	0.00645974	0.000146395
	06	ok	5	32.6068	0.0485992	22.6745	1.43692	44373.1	117442	36.6653	88.7032	4.79908	0.00721674		6e-17	0.184852	0.00011332	0.000381995	4.06219e-06	225.194	0.0399326	41.6083	0.0243899	0.523929	0.0107314	0.276542	0.0175239	0.0862242	0.00091444	226.839	0.0343444	41.4464	0.0177229	0.552439	0.00554767	0.243927	0.0112682	0.0931079	0.000899023	1.61658	0.0187146	0.0578128	0.0131239	0.0146356	0.00788968	0.0295311	0.0109127	0.00644091	0.000148175
	07	ok	5	32.6988	0.0425666	24.899	1.45352	15850.3	12395.4	40.4984	88.272	4.81274	0.00632126		6e-17	0.183431	9.72509e-05	0.000396591	3.50748e-06	285.315	0.0677211	52.3115	0.0247599	0.668989	0.011063	0.316594	0.0184808	0.113384	0.00100015	286.954	0.0642257	52.135	0.0182246	0.703141	0.00631647	0.285237	0.011307	0.120478	0.000981397	1.61836	0.0195875	0.0578128	0.0131239	0.0146356	0.00788968	0.0295311	0.0109127	0.00642173	0.000151137
	08	ok	5	32.6101	0.023196	24.77	1.09869	-680516	1.62899e+07	45.8304	94.6459	4.79956	0.0034445		6e-17	0.197218	7.48595e-05	0.000180845	1.92221e-06	369.146	0.0443172	72.768	0.0261226	0.892891	0.0106711	0.442658	0.0196335	0.0670869	0.000709267	370.784	0.0385533	72.5577	0.0192563	0.930348	0.00503501	0.396634	0.0111115	0.0738962	0.000689129	1.62008	0.0205085	0.0578128	0.0131239	0.0146356	0.00788968	0.0295311	0.0109127	0.00640324	0.000155032
	09	ok	5	32.7264	0.0507019	25.1971	2.72829	151513	2.02659e+06	47.9238	92.7034	4.81684	0.00752948		6e-17	0.192477	0.000167773	0.000246597	4.03739e-06	148.497	0.037066	28.5688	0.0238438	0.353519	0.0110177	0.170807	0.0184939	0.0367448	0.000599229	150.129	0.0268469	28.449	0.0173982	0.383745	0.00649177	0.143519	0.011711	0.0433253	0.000574299	1.62501	0.0235015	0.0578128	0.0131239	0.0146356	0.00788968	0.0295311	0.0109127	0.00635012	0.000171186
	10	ok	5	32.5666	0.0544411	28.0889	1.77293	34530	55818.5	51.8419	82.5996	4.79312	0.00808406		6e-17	0.172346	9.32988e-05	0.000588584	4.33155e-06	310.398	0.0732949	53.4712	0.0260123	0.688353	0.0106946	0.286758	0.018099	0.182896	0.00134358	312.041	0.0687811	53.2918	0.019894	0.726741	0.00583256	0.246785	0.0107271	0.190184	0.00131617	1.62673	0.0246424	0.0578128	0.0131239	0.0146356	0.00788968	0.0295311	0.0109127	0.00633157	0.000178293
	11	ok	5	32.6898	0.0222368	25.8618	0.879097	126512	496446	58.6455	94.8849	4.81141	0.00330221		6e-17	0.197229	6.13782e-05	0.000172758	1.93816e-06	470.992	0.0566716	92.8496	0.0265205	1.14242	0.0118057	0.540778	0.0183813	0.0817697	0.000912563	472.638	0.0499284	92.5671	0.0209203	1.17475	0.00670744	0.48856	0.0109351	0.0886104	0.00089021	1.62845	0.0258226	0.0578128	0.0131239	0.0146356	0.00788968	0.0295311	0.0109127	0.00631302	0.000186025
X	12	outlier	5	30.4179	0.513683	0.295224	0.00281514	1320.49	1079.12	58.9355	38.2287	4.47423	0.0761882		6e-17	0.0854459	0.000468341	0.00209034	2.03455e-05	46.3428	0.0583734	3.96214	0.021113	0.0794086	0.0107868	2.01933	0.0159448	0.0984008	0.000934512	47.9843	0.0511392	3.90977	0.0130328	0.108407	0.00589596	1.98694	0.00941991	0.105189	0.000908679	1.63021	0.0270672	0.0578128	0.0131239	0.0146356	0.00788968	0.0295311	0.0109127	0.00629402	0.000194518
	13	ok	5	32.6927	0.0230129	28.813	1.4005	121979	584463	63.9585	95.0897	4.81183	0.00341746		6e-17	0.197638	8.05713e-05	0.000165824	1.844e-06	347.009	0.050684	68.5496	0.026018	0.843045	0.0113551	0.358272	0.0174136	0.0578084	0.000639599	348.658	0.0419091	68.3475	0.019073	0.874755	0.00624265	0.338455	0.0107665	0.064434	0.000606761	1.62789	0.0271732	0.0578128	0.0131239	0.0146356	0.00788968	0.0295311	0.0109127	0.00626469	0.000195066
X	14	outlier	5	29.9924	0.232992	0.339439	0.00145078	2140.5	1137.86	64.7284	49.6084	4.41113	0.0345489		6e-17	0.112469	0.000233523	0.0017052	1.22811e-05	93.4617	0.0494027	10.5162	0.0210937	0.178975	0.0114813	4.66103	0.0175712	0.1629	0.0011433	95.0956	0.0413601	10.4159	0.0148479	0.215336	0.00694002	4.61315	0.0111569	0.169869	0.00111336	1.62346	0.0258787	0.0578128	0.0131239	0.0146356	0.00788968	0.0295311	0.0109127	0.00625667	0.000185606
	15	ok	5	32.5811	0.0514779	28.1695	2.79659	23317.2	42864.6	67.2156	87.866	4.79527	0.00764411		6e-17	0.183253	0.000139827	0.000410332	4.08862e-06	185.318	0.0413658	33.9442	0.024749	0.431566	0.0116656	0.181434	0.0180115	0.0761725	0.000757287	186.939	0.0324537	33.7988	0.0171788	0.463569	0.00718029	0.144361	0.01101	0.0828261	0.000732663	1.61914	0.0247093	0.0578128	0.0131239	0.0146356	0.00788968	0.0295311	0.0109127	0.00624883	0.000176924
	16	ok	5	32.6993	0.025466	22.3381	0.516129	-32687	25351.4	75.9417	89.546	4.81281	0.00378177		6e-17	0.186076	5.06755e-05	0.000353468	2.1473e-06	640.285	0.0611882	119.087	0.0302067	1.46792	0.0109259	0.802629	0.0185437	0.226905	0.00137444	641.921	0.0559615	118.775	0.0236644	1.50228	0.00603216	0.765156	0.0118979	0.234313	0.00133854	1.61482	0.0236467	0.0578128	0.0131239	0.0146356	0.00788968	0.0295311	0.0109127	0.00624099	0.000168867
X	17	outlier	5	32.489	0.0245228	25.9487	0.735927	87232.2	194657	83.9761	90.7564	4.78159	0.00364128		6e-17	0.189823	5.9017e-05	0.000312497	2.06376e-06	577.898	0.0576628	109.647	0.0321507	1.36667	0.0110681	0.636134	0.0180401	0.181056	0.00119226	579.531	0.0523074	109.342	0.026582	1.4052	0.00615507	0.609692	0.0117488	0.188218	0.00116289	1.61045	0.0226978	0.0578128	0.0131239	0.0146356	0.00788968	0.0295311	0.0109127	0.00623308	0.000161466
	18	ok	5	32.668	0.022339	28.4701	1.26265	28346.2	29731	89.4763	96.5729	4.80817	0.00331735		6e-17	0.200874	8.51232e-05	0.00011562	1.76508e-06	373.859	0.0473285	75.0628	0.030279	0.928393	0.0116431	0.396891	0.0176013	0.0435233	0.000659633	375.495	0.0412172	74.842	0.0244794	0.95987	0.00705561	0.374666	0.0102717	0.0500708	0.000640927	1.60618	0.0219047	0.0578128	0.0131239	0.0146356	0.00788968	0.0295311	0.0109127	0.00622535	0.000155035
	19	ok	5	32.6962	0.0430348	20.6512	1.26918	-59590.5	224439	92.4866	89.7125	4.81236	0.00639076		6e-17	0.18644	0.000110091	0.000347831	3.55286e-06	220.452	0.0407481	41.0821	0.0230116	0.508637	0.0112521	0.299438	0.0184019	0.0768996	0.00078288	222.058	0.0335521	40.9402	0.015569	0.546456	0.00720304	0.255022	0.0107152	0.0835551	0.000764929	1.60181	0.0212468	0.0578128	0.0131239	0.0146356	0.00788968	0.0295311	0.0109127	0.00621741	0.000149385
	20	ok	5	32.6066	0.0149384	26.2748	0.772967	-59481.3	94533.8	100	98.0297	4.79906	0.00221827		6e-17	0.204291	6.2996e-05	6.63101e-05	1.13499e-06	502.157	0.0469306	102.538	0.0299846	1.23984	0.0109236	0.587372	0.0172786	0.0337397	0.000569669	503.762	0.0413413	102.255	0.0231115	1.27271	0.0064646	0.545105	0.0108388	0.0402394	0.000550963	1.59742	0.0207593	0.0578128	0.0131239	0.0146356	0.00788968	0.0295311	0.0109127	0.00620946	0.000144786
Weighted mean K/Ca ±2σ						25.8131	1.51993	SE but if MSWD>1 use SE * sqrt(MSWD)
Weighted mean Age ±2σ				32.675	0.0956901	n=17/20	MSWD = *4.38
Isochron Age ±2σ				32.676	0.0938083		MSWD = *4.74
(40Ar/36Ar)trapped ±2σ				295.381	2.83234
	Sample:	19L-6B			Identifier:	67494
	Material:	Biotite
	Weight:	2.66 mg
x	01A	Outlier	0.5	18.9587	1.69823	4.29622	0.548921	1639.95	1561.14	0.416306	3.84053	2.77801	0.250132	0.0261187	2.13e-16	0.0138248	8.05336e-05	0.00325413	1.02962e-05	229.644	0.0505592	3.17442	0.0184772	0.187154	0.00810002	0.193017	0.0246341	0.747369	0.00235867	230.766	0.0444084	3.1094	0.0148266	0.258758	0.00529402	0.14565	0.0149233	0.733914	0.00222797	1.22373	0.0241688	0.0295414	0.0107835	0.00558506	0.00613055	0.0259262	0.0195994	0.00530636	0.000212743
x	01B	Outlier	1	34.4312	0.642517	15.9122	4.56025	4648.25	7908.09	1.11419	20.1641	5.06662	0.0954395	0.0437846	2.13e-16	0.0397987	0.000132408	0.00270171	1.17781e-05	133.728	0.0466903	5.32122	0.0176049	0.137228	0.00856885	0.0873474	0.0250306	0.361324	0.00156991	134.855	0.0407035	5.24834	0.0137344	0.202883	0.00598678	0.0543678	0.0155691	0.357607	0.00149564	1.22563	0.0228737	0.0295414	0.0107835	0.00558506	0.00613055	0.0259262	0.0195994	0.00535053	0.000201014
	01C	ok	1.5	34.775	0.123536	20.3918	2.27693	3560.52	1349.48	3.46745	72.0087	5.11768	0.0183536	0.147642	2.13e-16	0.140716	0.000164664	0.000947066	8.06079e-06	127.543	0.0498757	17.9431	0.0197844	0.26202	0.00836115	0.229795	0.0256572	0.120884	0.00102686	128.7	0.0448851	17.7893	0.0162993	0.334906	0.00568553	0.19417	0.0165576	0.123244	0.000979077	1.22752	0.0217466	0.0295414	0.0107835	0.00558506	0.00613055	0.0259262	0.0195994	0.00539452	0.000190508
	01D	ok	1.7	33.9528	0.0776525	16.5674	1.30286	3092.4	887.573	6.16736	86.2561	4.99557	0.0115315	0.169391	2.13e-16	0.172681	0.000190591	0.000464835	5.82835e-06	119.246	0.0478217	20.5863	0.0211599	0.288875	0.00834936	0.324454	0.0255124	0.0555678	0.000694488	120.401	0.0430375	20.4216	0.017889	0.359449	0.00566818	0.28165	0.0163324	0.0596093	0.000651012	1.22932	0.0208491	0.0295414	0.0107835	0.00558506	0.00613055	0.0259262	0.0195994	0.00543637	0.000181787
	01E	ok	2	33.7764	0.0574847	10.3217	0.318038	3519.74	747.537	10.45	89.4209	4.96937	0.00853574	0.26869	2.13e-16	0.179962	0.00013448	0.000357711	4.61916e-06	181.499	0.0555806	32.6548	0.0222404	0.448266	0.00851992	0.825945	0.0254424	0.0652811	0.000837955	182.645	0.0518006	32.4031	0.0189515	0.520574	0.00591654	0.782696	0.0162228	0.0691204	0.000796729	1.23112	0.0201471	0.0295414	0.0107835	0.00558506	0.00613055	0.0259262	0.0195994	0.0054781	0.000174517
	01F	ok	2.1	33.4679	0.0561749	10.9573	0.472374	3318.17	873.47	13.6458	92.1046	4.92356	0.00833984	0.2005	2.13e-16	0.187088	0.000165174	0.000266871	4.46136e-06	130.278	0.0447302	24.3674	0.0198064	0.333787	0.00842467	0.580492	0.0250202	0.0350194	0.000580915	131.449	0.04018	24.1787	0.0162342	0.407172	0.00577853	0.563537	0.0155524	0.0396604	0.000540017	1.23292	0.0196559	0.0295414	0.0107835	0.00558506	0.00613055	0.0259262	0.0195994	0.00552007	0.000168827
	01G	ok	2.5	33.4824	0.0285636	11.5305	0.159949	3488.11	321.616	24.4078	92.452	4.92572	0.00424065	0.675202	2.13e-16	0.187711	7.50924e-05	0.000255116	2.33201e-06	437.268	0.0874405	82.0591	0.028345	1.11771	0.00862069	1.85736	0.0257562	0.11236	0.00101922	438.454	0.0852635	81.5263	0.024519	1.19051	0.00606075	1.78499	0.0167106	0.115106	0.000976656	1.23481	0.0193901	0.0295414	0.0107835	0.00558506	0.00613055	0.0259262	0.0195994	0.00556412	0.000164787
	01H	ok	3	33.3518	0.0181391	19.4043	0.248542	3938.9	268.48	43.6386	94.3691	4.90632	0.00269279	1.20652	2.13e-16	0.192362	4.8344e-05	0.000190224	1.52009e-06	762.467	0.0796027	146.63	0.0332825	1.96581	0.00842459	1.97187	0.0252525	0.145895	0.00115866	763.665	0.0772049	145.716	0.0271857	2.03872	0.00577841	1.91585	0.0159233	0.147846	0.00111301	1.23671	0.0193904	0.0295414	0.0107835	0.00558506	0.00613055	0.0259262	0.0195994	0.00560818	0.000162872
	01I	ok	3.25	33.3526	0.020922	28.0941	0.828914	4232.59	422.183	55.6296	95.1377	4.90644	0.00310593	0.752307	2.13e-16	0.193924	6.22246e-05	0.000164209	1.72901e-06	471.595	0.0642011	91.4285	0.0264456	1.2162	0.00831096	0.849086	0.0250507	0.077808	0.000815136	472.793	0.0611236	90.864	0.021929	1.28835	0.00561146	0.814332	0.0156013	0.0815103	0.000775815	1.23852	0.0196388	0.0295414	0.0107835	0.00558506	0.00613055	0.0259262	0.0195994	0.00565021	0.000163094
	01J	ok	3.5	33.2828	0.0296956	34.6254	2.10308	3906.48	542.001	63.017	95.7545	4.89608	0.00440822	0.463479	2.13e-16	0.195594	9.2236e-05	0.000143328	2.46717e-06	288.058	0.0531062	56.3269	0.0243959	0.752961	0.00834482	0.424365	0.0257743	0.0414709	0.00071047	289.251	0.0491489	55.9586	0.0208586	0.822089	0.00566148	0.41292	0.0167385	0.0461244	0.000671987	1.24031	0.0201161	0.0295414	0.0107835	0.00558506	0.00613055	0.0259262	0.0195994	0.00569194	0.000165287
	01K	ok	4	33.3389	0.024544	34.709	1.74384	4164.46	530.179	71.8276	95.8794	4.90442	0.00364359	0.55277	2.13e-16	0.195517	7.89197e-05	0.000139101	2.00315e-06	343.69	0.059733	67.1785	0.0244015	0.89306	0.00839468	0.504823	0.0253623	0.0480267	0.000688235	344.89	0.0559909	66.754	0.0205101	0.967803	0.00573472	0.460006	0.0160969	0.0525602	0.00064834	1.24211	0.0208099	0.0295414	0.0107835	0.00558506	0.00613055	0.0259262	0.0195994	0.00573378	0.000169384
	01L	ok	5	33.394	0.0222935	42.6621	1.97152	4020.27	386.564	83.4485	95.5483	4.91259	0.0033096	0.729085	2.13e-16	0.194517	6.95722e-05	0.000150309	1.82188e-06	455.644	0.0711852	88.606	0.0284019	1.18229	0.00820886	0.541633	0.0250294	0.0687217	0.000829885	456.834	0.0677971	88.0301	0.0243335	1.25856	0.00545909	0.515234	0.015567	0.0727803	0.00078835	1.24391	0.0216999	0.0295414	0.0107835	0.00558506	0.00613055	0.0259262	0.0195994	0.0057757	0.000175258
	01M	ok	6	33.3853	0.02816	86.7217	10.9765	4035.7	503.837	91.9856	94.2925	4.9113	0.0041805	0.535612	2.13e-16	0.192011	7.76686e-05	0.000192815	2.35998e-06	339.101	0.0576097	65.0929	0.023828	0.871102	0.00824612	0.195714	0.0247716	0.0654659	0.00080003	340.271	0.0529222	64.6788	0.019911	0.945158	0.00551496	0.192838	0.0151492	0.0696401	0.000756828	1.24572	0.0227622	0.0295414	0.0107835	0.00558506	0.00613055	0.0259262	0.0195994	0.00581761	0.000182734
	01N	ok	7	33.5082	0.0568113	56.2496	13.1113	4486.7	1578.23	95.084	94.0546	4.92954	0.00843451	0.194393	2.13e-16	0.190817	0.00017366	0.00020087	4.57933e-06	123.842	0.0469924	23.6246	0.0195297	0.313778	0.00807001	0.109495	0.025522	0.0249226	0.00056686	125.019	0.0404181	23.4582	0.0159128	0.391397	0.005248	0.0844279	0.0163474	0.0301591	0.00051805	1.24752	0.0239721	0.0295414	0.0107835	0.00558506	0.00613055	0.0259262	0.0195994	0.00585946	0.000191609
	01O	ok	12	33.3545	0.0383795	23.5996	1.42926	4781.45	1167.65	100	93.5118	4.90673	0.00569755	0.308426	2.13e-16	0.190598	0.000118239	0.000219241	3.06836e-06	196.715	0.0518616	37.4833	0.021022	0.496269	0.00821853	0.41401	0.0250722	0.0433065	0.000603311	197.909	0.0452653	37.2192	0.0174223	0.574439	0.00547363	0.373434	0.0156359	0.0481235	0.000551644	1.24932	0.0253117	0.0295414	0.0107835	0.00558506	0.00613055	0.0259262	0.0195994	0.00590137	0.000201724
Integrated K/Ca ±2σ						21.842	0.46921	SD
No Plateau Age
Total Integrated Age ±2σ				33.3919	0.0243573									K2O wt. %=6.27
Isochron Age ±2σ				33.13	0.106116		MSWD = *2.31
(40Ar/36Ar)trapped ±2σ				334.3	5.5
	Sample:	19L-6A			Identifier:	67299
	Material:	Biotite
	Weight:	3.37 mg
X	01A	outlier	0.5	17.0628	0.318062	31.3553	4.06943	23.529	3.52027	2.61565	13.1929	2.4854	0.0465457	0.297687	4e-16	0.053082	5.39698e-05	0.00293763	6.70474e-06	462.381	0.0591977	24.5391	0.0247503	0.620938	0.0103596	0.226884	0.0290759	1.35841	0.00309517	463.014	0.0506472	24.3942	0.016407	0.706165	0.00519549	0.334836	0.0155872	1.33523	0.00289396	0.893807	0.0272368	0.013078	0.0152091	0.00710579	0.00685656	0.0214597	0.0199377	0.00502601	0.000190996
X	01B	outlier	0.8	29.8057	0.108346	20.2762	2.07504	51.5904	19.3253	4.73445	66.7302	4.35671	0.0159662	0.24114	4e-16	0.153169	0.000178374	0.00112584	7.57165e-06	129.804	0.0451013	19.8779	0.0220923	0.29336	0.00960768	0.283207	0.0286594	0.146275	0.000981389	130.42	0.0334434	19.7468	0.014582	0.375754	0.00549698	0.347636	0.0144815	0.148385	0.000939023	0.894552	0.0257144	0.016387	0.0143643	0.00665798	0.00648053	0.0200345	0.0188232	0.00514234	0.00018105
X	01C	outlier	1	32.8334	0.098951	30.4744	5.46247	64.0131	36.7253	6.48252	79.353	4.80326	0.0146059	0.198948	4e-16	0.16521	0.00023	0.000698658	7.1152e-06	99.2878	0.0422449	16.3998	0.021737	0.22829	0.00978945	0.155917	0.027645	0.0694433	0.000705684	99.8983	0.0314568	16.2989	0.0138187	0.313277	0.00510457	0.223071	0.0148084	0.0732451	0.000667355	0.895203	0.0244932	0.0192726	0.0136904	0.00626747	0.00618407	0.0187917	0.017929	0.00524378	0.000173593
pX	01D	ok	1.5	33.5101	0.0360773	57.0999	4.09641	84.7974	13.871	14.2823	86.8078	4.90317	0.00532726	0.887695	4e-16	0.177048	7.88785e-05	0.000446369	2.80031e-06	413.395	0.0634717	73.1746	0.0305851	0.976392	0.00927898	0.374139	0.0261073	0.184706	0.00115718	414.036	0.0579117	72.781	0.0189258	1.07058	0.0050936	0.461106	0.0142151	0.186348	0.00111508	0.896617	0.0222584	0.0255494	0.0124729	0.00541802	0.00566282	0.0160882	0.0162923	0.00546444	0.000162039
	01E	ok	1.7	33.3894	0.0320194	99.0466	12.158	62.0204	6.59731	22.4422	88.7509	4.88534	0.00472775	0.928674	4e-16	0.181672	8.10161e-05	0.000380611	2.48945e-06	421.472	0.0567708	76.5524	0.0325238	1.0374	0.00858951	0.228429	0.0271184	0.160526	0.00104889	422.154	0.0501423	76.1324	0.0206176	1.11728	0.00494726	0.358857	0.0140347	0.162784	0.0010094	0.897381	0.0213415	0.0289406	0.0119853	0.00495908	0.00546504	0.0146276	0.0156205	0.00558366	0.000158839
	01F	ok	1.9	33.3595	0.0340721	87.7818	11.9308	64.4206	9.94031	28.5168	89.8526	4.88093	0.00503075	0.691349	4e-16	0.184093	9.35031e-05	0.000343327	2.65297e-06	309.637	0.0528565	56.9893	0.0272479	0.767556	0.00901334	0.191204	0.025236	0.106398	0.000821135	310.255	0.045931	56.681	0.0167222	0.847844	0.00522299	0.254309	0.0140262	0.109889	0.000785396	0.898127	0.0206783	0.0322496	0.0116441	0.00451127	0.00533731	0.0132024	0.0151343	0.00569999	0.000157957
	01G	ok	2	33.3987	0.0344825	110.31	19.1061	67.7347	10.2596	34.6202	90.0096	4.88672	0.00509146	0.694627	4e-16	0.184197	9.92697e-05	0.000338013	2.64408e-06	310.931	0.0523489	57.2594	0.0293015	0.767963	0.00844223	0.153867	0.0257365	0.105172	0.00082181	311.585	0.045867	56.9518	0.0182088	0.843881	0.00506665	0.245198	0.0140074	0.108807	0.000785862	0.898872	0.0202667	0.0355545	0.011448	0.00406402	0.0052788	0.011779	0.0148321	0.00581617	0.000159322
	01H	ok	2.1	33.4584	0.0488302	117.714	40.044	82.6908	31.6281	37.9112	90.3857	4.89553	0.00721018	0.374542	4e-16	0.184634	0.00014511	0.000325284	3.75117e-06	167.257	0.0444463	30.8742	0.0228308	0.408162	0.00949565	0.0778923	0.0255696	0.0544428	0.000627096	167.89	0.0372247	30.7225	0.0158492	0.312251	0.00529513	0.169396	0.0137883	0.0593201	0.000590076	0.9001	0.0201723	0.041005	0.0114577	0.00332639	0.00533797	0.00943141	0.0147614	0.00600779	0.000166293
	01I	ok	2.5	33.4016	0.0299904	119.802	15.1791	-59.2165	6.47158	46.7592	90.4872	4.88715	0.00442818	1.00699	4e-16	0.185158	8.18029e-05	0.000321849	2.35297e-06	448.414	0.0595135	83.0084	0.0349566	0.936608	0.0100506	0.20586	0.0250751	0.144411	0.00105482	449.068	0.0539781	82.571	0.0198864	1.02863	0.0072689	0.257669	0.0140191	0.147539	0.00101399	0.900846	0.0204735	0.044314	0.0116656	0.00287858	0.00546618	0.00800622	0.014981	0.00612411	0.000173136
	01J	ok	3	33.3787	0.0279686	101.316	12.348	50.6719	4.51542	55.2994	90.2628	4.88375	0.00412962	0.971961	4e-16	0.184827	8.04365e-05	0.000329443	2.13378e-06	433.588	0.0611335	80.1206	0.0329655	1.10035	0.00921843	0.233635	0.0275185	0.142955	0.000924832	434.217	0.0546425	79.6939	0.0175508	1.17632	0.00482019	0.300076	0.0151559	0.146228	0.000882355	0.901595	0.021037	0.0476394	0.0120197	0.00242854	0.00565996	0.00657395	0.0153924	0.00624102	0.000181739
	01K	ok	3.5	33.3188	0.0246425	171.584	27.6448	72.6361	7.72822	65.7959	90.7838	4.87492	0.00363839	1.19461	4e-16	0.186231	7.49981e-05	0.00031181	1.84978e-06	528.893	0.0620534	98.4736	0.0379071	1.31119	0.00938013	0.173036	0.026431	0.164995	0.000978023	529.521	0.0558233	97.9249	0.0215471	1.39566	0.0052097	0.261087	0.0147642	0.167933	0.000932168	0.90235	0.0218484	0.0509895	0.0125111	0.00197517	0.00591453	0.00513105	0.0159854	0.00635879	0.000191921
	01L	ok	5	33.3488	0.0187611	166.32	13.9615	72.9983	4.28375	86.8817	91.3387	4.87935	0.00277007	2.39976	4e-16	0.187199	6.16228e-05	0.000293031	1.33565e-06	1056.96	0.0921877	197.817	0.062719	2.62902	0.00972587	0.357991	0.0283444	0.309891	0.00141135	1057.67	0.0879327	196.764	0.0288901	2.71316	0.00568782	0.413678	0.0134386	0.309942	0.00135217	0.903096	0.0228661	0.0543026	0.0131152	0.0015268	0.00621772	0.00370409	0.0167295	0.00647526	0.000203262
pX	01M	ok	6	33.4733	0.0412896	72.9531	10.1026	64.1558	12.4228	92.0618	89.5939	4.89772	0.00609679	0.589553	4e-16	0.182934	0.000109173	0.000352082	3.24604e-06	265.719	0.0510083	48.598	0.0274514	0.6553	0.00971818	0.195056	0.0263505	0.0936489	0.00086222	266.366	0.0424463	48.3644	0.017082	0.735948	0.00459832	0.265112	0.0147879	0.0983012	0.000814043	0.903842	0.024069	0.0576116	0.0138203	0.00107899	0.00656451	0.00227889	0.0176091	0.00659159	0.000215652
pX	01N	ok	7	33.4318	0.0490763	71.1671	11.6968	75.4427	20.742	96.5129	87.6354	4.8916	0.00724641	0.506581	4e-16	0.179159	0.000118565	0.000418361	3.8497e-06	233.133	0.0529039	41.7585	0.0259521	0.5598	0.0101029	0.171688	0.027565	0.097616	0.000897087	233.78	0.0441879	41.5535	0.0159754	0.645043	0.00500285	0.268094	0.0135837	0.10231	0.000845726	0.904587	0.02543	0.0609165	0.0146114	0.000631738	0.00694816	0.00085547	0.0186046	0.00670778	0.000228915
pX	01O	ok	15	33.5363	0.0583371	83.0436	20.8239	62.6008	18.4367	100	87.5616	4.90703	0.00861431	0.396863	4e-16	0.178445	0.000144805	0.000420859	4.53716e-06	183.37	0.0498236	32.7142	0.0250094	0.444624	0.0102325	0.115655	0.0282629	0.0772283	0.000831571	183.998	0.0398505	32.557	0.0162469	0.518792	0.00494941	0.198474	0.0140002	0.082437	0.000776157	0.90524	0.0267356	0.0638144	0.0153659	0.000239556	0.00731062	-0.000392681	0.0195597	0.00680965	0.00024116
Integrated K/Ca ±2σ						124.962	12.2181	SD
Plateau Age ±2σ				33.3673	0.0252757	n=8/15	MSWD = 1.59	steps E-L
Total Integrated Age ±2σ				32.8846	0.0245803									K2O wt. %=11.38
Isochron Age ±2σ				33.0753	0.140734		MSWD = 1.32
(40Ar/36Ar)trapped ±2σ				320.658	10.2968
	Sample:	19L-8			Identifier:	67804
	Material:	GroundmassConcentrate
	Weight:	8.31 mg
pX	01A	ok	0.8	36.3973	0.290057	1.49144	0.0204276	193.426	210.105	2.76224	29.9296	5.31129	0.0427488	0.0613797	2.13e-16	0.0563513	5.67435e-05	0.00237124	7.01589e-06	417.323	0.058834	23.5129	0.0234363	0.479134	0.00876926	2.52965	0.022957	0.991776	0.00292442	417.059	0.0532066	23.4466	0.017008	0.576878	0.00579564	2.62065	0.0147971	0.991792	0.00288072	0.18743	0.0251096	0.0277187	0.0143462	0.00181511	0.00658107	0.0113994	0.0175518	0.00178645	0.00015677
X	01B	outlier	1.3	35.2269	0.0425833	1.11235	0.0114893	-123.915	19.8524	15.448	79.7371	5.13885	0.00627196	0.28189	2.13e-16	0.155168	6.34758e-05	0.00068566	2.87175e-06	696.039	0.0671443	107.994	0.0428836	1.34401	0.00902497	15.5724	0.0241177	0.490824	0.00199802	695.764	0.0628844	107.758	0.023301	1.44392	0.00617573	15.6865	0.0165408	0.491726	0.00197681	0.183397	0.0235353	0.0277187	0.0143462	0.00181511	0.00658107	0.0113994	0.0175518	0.00177657	0.000146371
X	01C	outlier	1.6	33.5739	0.018977	1.13104	0.0116015	-122.18	12.268	36.1222	94.845	4.89549	0.00279254	0.459402	2.13e-16	0.193744	7.22652e-05	0.000174371	1.34998e-06	908.495	0.0813916	175.999	0.0636227	2.0726	0.00892126	24.9552	0.0244107	0.180188	0.00122572	908.241	0.0783037	175.579	0.0290735	2.17768	0.00602316	25.0652	0.0169651	0.181638	0.00121311	0.17928	0.0222066	0.0277187	0.0143462	0.00181511	0.00658107	0.0113994	0.0175518	0.00176647	0.000137195
X	01D	outlier	1.9	32.9617	0.0162188	1.25938	0.0129515	-180.288	27.5079	55.0512	98.2265	4.80542	0.00238586	0.420619	2.13e-16	0.204413	8.00458e-05	5.99305e-05	1.00728e-06	788.388	0.0806066	161.135	0.0608185	1.90644	0.00846077	20.5176	0.0250638	0.065156	0.000793341	788.13	0.0777511	160.777	0.029388	2.01116	0.00531734	20.6111	0.0178921	0.0668186	0.000780597	0.175431	0.0212647	0.0277187	0.0143462	0.00181511	0.00658107	0.0113994	0.0175518	0.00175703	0.0001302
X	01E	outlier	2.2	32.5923	0.0167468	1.30927	0.0135349	-350.743	129.784	69.9486	98.5584	4.75108	0.00246303	0.331036	2.13e-16	0.20745	8.56023e-05	4.86952e-05	1.04118e-06	611.396	0.0699805	126.816	0.0502057	1.5215	0.0085284	15.5303	0.0249644	0.0433308	0.000635856	611.086	0.0668623	126.537	0.0243996	1.62125	0.00542431	15.6197	0.0177526	0.0450065	0.000621979	0.171604	0.0206568	0.0277187	0.0143462	0.00181511	0.00658107	0.0113994	0.0175518	0.00174765	0.000125027
	01F	ok	3	32.3947	0.019704	0.879011	0.00906053	-548.322	401.494	81.6191	98.3534	4.72203	0.00289765	0.25933	2.13e-16	0.208292	9.49431e-05	5.56333e-05	1.36161e-06	477.023	0.0632269	99.36	0.0432656	1.20236	0.00860212	18.1162	0.025173	0.0423611	0.000648699	476.727	0.0598436	99.1544	0.0232824	1.30422	0.00553949	18.1887	0.0180447	0.0440291	0.000635686	0.167766	0.0204056	0.0277187	0.0143462	0.00181511	0.00658107	0.0113994	0.0175518	0.00173824	0.00012185
	01G	ok	5	32.3447	0.0330558	0.595975	0.00624258	475.417	720.996	86.2767	98.2846	4.71468	0.00486102	0.103496	2.13e-16	0.208471	0.000154234	5.79624e-05	2.38113e-06	190.212	0.0471324	39.662	0.0276136	0.492064	0.00838774	10.661	0.0240729	0.0203402	0.000452198	189.903	0.0424278	39.589	0.0190203	0.598126	0.00520036	10.7358	0.0164754	0.0220354	0.000434816	0.163928	0.0205266	0.0277187	0.0143462	0.00181511	0.00658107	0.0113994	0.0175518	0.00172883	0.000120846
	01H	ok	7	32.3189	0.0639588	0.499427	0.00557535	124.425	117.651	88.3289	97.7351	4.71089	0.00940533	0.0456019	2.13e-16	0.207472	0.000302643	7.6559e-05	4.4917e-06	84.2139	0.0422093	17.4779	0.0239192	0.224483	0.00883887	5.60446	0.0241634	0.0113457	0.000377574	83.8774	0.0366091	17.4421	0.01796	0.327552	0.00590043	5.68594	0.0166073	0.0130449	0.000356552	0.160112	0.0210095	0.0277187	0.0143462	0.00181511	0.00658107	0.0113994	0.0175518	0.00171947	0.000122056
	01I	ok	10	32.3535	0.0292787	0.43835	0.00450913	-965.096	2194.48	95.0215	97.3854	4.71597	0.0043056	0.148717	2.13e-16	0.206507	0.000125996	8.83925e-05	2.22792e-06	275.921	0.0548195	57.0048	0.0328143	0.699546	0.00886684	20.8202	0.0242397	0.0425859	0.000613745	275.611	0.0502849	56.8841	0.0202627	0.793459	0.00594226	20.9211	0.0167181	0.0442254	0.000599369	0.15629	0.0218314	0.0277187	0.0143462	0.00181511	0.00658107	0.0113994	0.0175518	0.0017101	0.00012541
	01J	ok	15	32.3856	0.0375409	0.340894	0.00351086	2795.16	23474.7	100	97.0624	4.72068	0.00552071	0.110627	2.13e-16	0.205616	0.000149053	9.93255e-05	3.0026e-06	206.14	0.0516939	42.4153	0.0287787	0.527009	0.00843906	19.9116	0.0242189	0.0378812	0.000618024	205.827	0.0463193	42.3261	0.0185952	0.622036	0.00528274	19.9938	0.016688	0.039517	0.00060267	0.15248	0.0229518	0.0277187	0.0143462	0.00181511	0.00658107	0.0113994	0.0175518	0.00170076	0.000130724
Integrated K/Ca ±2σ						0.545665	0.0111684	SD
Plateau Age ±2σ				32.3735	0.026699	n=5/10	MSWD = 0.80	steps F-J
Total Integrated Age ±2σ				33.2383	0.0237828									K2O wt. %=2.22
Isochron Age ±2σ				32.3415	0.0339124		MSWD = 1.02
(40Ar/36Ar)trapped ±2σ				309.653	1.86297
	Sample:	19L-11			Identifier:	67854
	Material:	GroundmassConcentrate
	Weight:	8.0 mg
	01A	ok	0.8	36.5271	0.122744	1.1236	0.0116735	159.734	32.9099	8.45175	46.0749	5.311	0.0180254	0.183954	2.13e-16	0.0867548	4.10414e-05	0.00182486	4.2263e-06	784.953	0.0840333	68.092	0.031356	1.12474	0.005644	9.33873	0.0177144	1.4409	0.00331372	785.09	0.0804581	67.9644	0.0218464	1.23502	0.00553709	9.45768	0.0163145	1.4445	0.00317843	0.563473	0.0242508	0.0289884	0.00239744	0.00413504	0.00109333	0.0053733	0.00690201	0.00299366	0.000176122
X	01B	outlier	1.3	33.5288	0.0208468	0.830582	0.00849508	-185.008	19.3482	31.8166	92.4644	4.87104	0.00305643	0.508542	2.13e-16	0.189829	6.83677e-05	0.000254936	1.54476e-06	991.736	0.0864271	188.263	0.0656535	2.27223	0.00593794	34.9159	0.0210264	0.284548	0.00153095	991.861	0.0834197	187.954	0.0312576	2.38579	0.00583642	35.0355	0.0198614	0.287642	0.00151178	0.55511	0.0226008	0.0289884	0.00239744	0.00413504	0.00109333	0.0053733	0.00690201	0.00296779	0.000163871
X	01C	outlier	1.6	32.9496	0.0182378	1.00175	0.0102577	-196.009	24.8609	50.9089	95.3012	4.78614	0.00267308	0.415548	2.13e-16	0.199124	6.9964e-05	0.000158928	1.36978e-06	772.558	0.0812286	153.825	0.0514675	1.84153	0.00583427	23.6533	0.0185678	0.144271	0.00105751	772.702	0.0784096	153.595	0.025771	1.96056	0.00573092	23.7642	0.0172373	0.14729	0.00104267	0.546734	0.021214	0.0289884	0.00239744	0.00413504	0.00109333	0.0053733	0.00690201	0.0029419	0.000153307
	01D	ok	1.9	32.7161	0.0220535	1.18551	0.0121937	-255.052	52.6466	65.6705	94.7618	4.75192	0.00323192	0.321289	2.13e-16	0.199423	7.31702e-05	0.000177185	1.80778e-06	596.423	0.0667678	118.925	0.0414834	1.43369	0.00593229	15.4515	0.0192016	0.119717	0.00107775	596.556	0.063657	118.768	0.0251105	1.54682	0.00583067	15.5622	0.0179182	0.122688	0.00106566	0.538312	0.0201429	0.0289884	0.00239744	0.00413504	0.00109333	0.0053733	0.00690201	0.00291585	0.000144781
	01E	ok	2.2	32.7206	0.0256956	1.19561	0.0123691	-1627.84	2810.25	76.1374	94.2186	4.75257	0.00376567	0.227814	2.13e-16	0.198253	8.1955e-05	0.000195567	2.12308e-06	425.398	0.0633737	84.3254	0.0324697	1.03667	0.00570283	10.8619	0.0180184	0.0930664	0.000902767	425.497	0.0603154	84.2259	0.0229979	1.1456	0.00559705	10.9647	0.0166441	0.0960003	0.000890416	0.52989	0.0194496	0.0289884	0.00239744	0.00413504	0.00109333	0.0053733	0.00690201	0.00288981	0.000138745
	01F	ok	3	32.4885	0.0287637	1.07081	0.0111213	-552.202	398.604	84.9541	93.1182	4.71856	0.00421476	0.191897	2.13e-16	0.197349	8.41412e-05	0.000232806	2.43481e-06	359.969	0.054585	71.0331	0.0282638	0.870699	0.00601328	10.2137	0.0193208	0.0930876	0.000876042	360.053	0.0511049	70.9632	0.0206636	0.982777	0.00591305	10.3124	0.0180459	0.0959913	0.000863781	0.521898	0.0191786	0.0289884	0.00239744	0.00413504	0.00109333	0.0053733	0.00690201	0.0028651	0.000135624
	01G	ok	5	32.3853	0.049079	0.710261	0.00739002	11652.6	256597	90.2637	87.8774	4.70344	0.00719118	0.115565	2.13e-16	0.186841	0.000101058	0.000410168	4.1837e-06	228.974	0.0464589	42.7857	0.0214211	0.539572	0.00531179	9.27075	0.0182515	0.102348	0.000957503	229.039	0.0422533	42.7452	0.0177411	0.647432	0.00519806	9.37003	0.0168961	0.10523	0.00094602	0.513546	0.0193156	0.0289884	0.00239744	0.00413504	0.00109333	0.0053733	0.00690201	0.00283927	0.00013527
	01H	ok	7	32.4895	0.0814906	0.61341	0.00667485	-407.794	674.448	92.7774	84.9941	4.71871	0.0119409	0.0547114	2.13e-16	0.180126	0.000171747	0.000507748	6.65499e-06	112.444	0.0430073	20.2576	0.0176759	0.254758	0.00545512	5.08106	0.0186686	0.0617139	0.000747737	112.487	0.0381583	20.248	0.0165038	0.367362	0.00534443	5.17501	0.0173459	0.0645596	0.000734191	0.505577	0.0198386	0.0289884	0.00239744	0.00413504	0.00109333	0.0053733	0.00690201	0.00281463	0.000137722
	01I	ok	10	32.4892	0.0564979	0.588909	0.00608568	1523.44	4696.84	98.2485	83.5713	4.71867	0.00827868	0.119081	2.13e-16	0.177112	9.99599e-05	0.000555898	4.58971e-06	248.901	0.0489049	44.0924	0.0232917	0.566513	0.00587075	11.5172	0.0177694	0.14884	0.00114179	248.949	0.044275	44.0631	0.0190243	0.671299	0.00576805	11.6007	0.0163741	0.151693	0.00112923	0.49719	0.0207705	0.0289884	0.00239744	0.00413504	0.00109333	0.0053733	0.00690201	0.00278869	0.00014309
	01J	ok	15	32.6977	0.104915	0.588249	0.00667142	875.42	4444.51	100	83.3701	4.74922	0.015375	0.038121	2.13e-16	0.175549	0.000219351	0.000562706	8.32055e-06	80.3893	0.0417217	14.1152	0.0160296	0.181992	0.00544379	3.69052	0.0177633	0.0485932	0.000668229	80.4004	0.0354661	14.1145	0.0151681	0.29573	0.00533287	3.7883	0.0163676	0.0513802	0.000650582	0.489221	0.0219739	0.0289884	0.00239744	0.00413504	0.00109333	0.0053733	0.00690201	0.00276405	0.000150564
Integrated K/Ca ±2σ						0.946381	0.0193605	SD
Total integrated Age ±2σ				33.2174	0.0277063	n=8/10	MSWD = *154.91
Total Integrated Age ±2σ				33.2174	0.0277063									K2O wt. %=2.18
Isochron Age ±2σ				32.4043	0.033315		MSWD = *42.30
(40Ar/36Ar)trapped ±2σ				321.885	1.55872
	Sample:	19L-9			Identifier:	67856
	Material:	GroundmassConcentrate
	Weight:	8.42 mg
	01B	ok	1.3	33.871	0.071471	1.31278	0.0137467	281.205	101.456	6.41695	64.8314	4.91565	0.0104687	0.170455	2.13e-16	0.13189	5.77e-05	0.0011901	4.09368e-06	504.128	0.0686541	66.4792	0.0276163	0.935639	0.00550412	7.71716	0.0178423	0.607046	0.00206194	504.144	0.0646116	66.4478	0.0207196	1.05117	0.00539444	7.79082	0.0164532	0.609523	0.00202146	0.438654	0.0232105	0.0289884	0.00239744	0.00413504	0.00109333	0.0053733	0.00690201	0.00221983	0.00012982
	01C	ok	1.6	33.2728	0.0301778	1.11506	0.0115382	-179.044	34.8043	14.4166	90.6021	4.82804	0.00441886	0.212497	2.13e-16	0.187663	7.66251e-05	0.00031796	2.44495e-06	441.694	0.0631007	82.8805	0.0316568	1.00284	0.00574643	11.3239	0.0189432	0.150841	0.00107944	441.722	0.0592676	82.8504	0.0223139	1.12057	0.00564146	11.4196	0.017641	0.153132	0.00106852	0.437918	0.0216574	0.0289884	0.00239744	0.00413504	0.00109333	0.0053733	0.00690201	0.00222543	0.000122576
	01D	ok	1.9	33.2285	0.0260943	1.0958	0.0112944	-172.239	31.0801	23.3585	92.8221	4.82155	0.00382083	0.237524	2.13e-16	0.19252	7.65218e-05	0.000242828	2.10749e-06	481.259	0.0635742	92.6423	0.0346766	1.11217	0.00617893	12.8778	0.0180618	0.128694	0.0010138	481.276	0.0601917	92.5916	0.0238768	1.22603	0.00608143	12.9759	0.016691	0.130983	0.00100395	0.437196	0.0204606	0.0289884	0.00239744	0.00413504	0.00109333	0.0053733	0.00690201	0.00223092	0.000117884
	01E	ok	2.2	33.1079	0.0204038	1.09225	0.0112204	-186.842	26.2369	34.5464	95.5723	4.8039	0.00298741	0.297186	2.13e-16	0.198953	7.26342e-05	0.000149753	1.6038e-06	582.676	0.0708844	115.913	0.0398266	1.38401	0.00529434	16.1623	0.0183164	0.10211	0.000933988	582.692	0.068107	115.837	0.0238623	1.50563	0.00518022	16.2527	0.0169662	0.104391	0.000924839	0.436472	0.019648	0.0289884	0.00239744	0.00413504	0.00109333	0.0053733	0.00690201	0.00223643	0.000115887
	01F	ok	3	32.9727	0.0151967	1.31393	0.0134524	-258.598	35.8949	53.5086	97.1482	4.78411	0.00222485	0.503697	2.13e-16	0.20307	6.79825e-05	9.64203e-05	1.04621e-06	967.547	0.083343	196.447	0.0634322	2.35247	0.00576788	22.7692	0.0175111	0.114218	0.00101159	967.596	0.0810841	196.302	0.0308915	2.46984	0.00566331	22.8658	0.0160935	0.116521	0.00100257	0.435748	0.0192727	0.0289884	0.00239744	0.00413504	0.00109333	0.0053733	0.00690201	0.00224193	0.000116738
	01G	ok	5	32.8185	0.0137099	2.04127	0.0208951	-904.805	337.199	84.2825	96.522	4.76152	0.00200701	0.817452	2.13e-16	0.202718	6.57786e-05	0.000117615	8.52657e-07	1572.96	0.129974	318.782	0.0998613	3.87579	0.00586986	23.7868	0.0177436	0.206865	0.00134057	1573.04	0.128523	318.51	0.0355879	3.99903	0.00576714	23.8586	0.0163462	0.209218	0.00132908	0.435006	0.0193673	0.0289884	0.00239744	0.00413504	0.00109333	0.0053733	0.00690201	0.00224758	0.000120504
	01H	ok	7	32.7467	0.0347019	1.50397	0.0163101	-271.185	139.023	88.9931	93.3002	4.75101	0.00507985	0.125129	2.13e-16	0.196385	0.000107235	0.000226649	2.86568e-06	248.541	0.0527122	48.7997	0.0245336	0.590823	0.00606412	4.94029	0.0179558	0.0608722	0.000711882	248.53	0.0488158	48.7865	0.0192923	0.712496	0.00596474	5.01849	0.0165763	0.0631503	0.000699771	0.434312	0.0198897	0.0289884	0.00239744	0.00413504	0.00109333	0.0053733	0.00690201	0.00225286	0.000126449
	01I	ok	10	32.8157	0.0353184	1.31294	0.013806	-15846.9	362366	95.0057	90.9568	4.76112	0.00517029	0.159715	2.13e-16	0.191046	9.36357e-05	0.000305955	2.92913e-06	326.104	0.0523641	62.2905	0.0288158	0.774904	0.00584888	7.22166	0.0180165	0.106414	0.00095483	326.112	0.048034	62.2483	0.0205501	0.890564	0.00574579	7.31366	0.016642	0.108722	0.00094319	0.433585	0.0208503	0.0289884	0.00239744	0.00413504	0.00109333	0.0053733	0.00690201	0.00225839	0.000134832
	01J	ok	15	32.9833	0.0387092	1.26536	0.0134065	-418.869	280.624	100	91.1654	4.78566	0.00566719	0.132664	2.13e-16	0.190502	0.00010454	0.000298895	3.18635e-06	271.645	0.053638	51.741	0.0264678	0.635446	0.00540781	6.22301	0.0174443	0.0869159	0.000865178	271.638	0.0488531	51.7081	0.0196457	0.746154	0.00529613	6.34061	0.0160208	0.0892185	0.000851513	0.432876	0.022145	0.0289884	0.00239744	0.00413504	0.00109333	0.0053733	0.00690201	0.00226378	0.000144791
Integrated K/Ca ±2σ						1.39603	0.0285244	SD
Total integrated Age ±2σ				33.0254	0.0172789	n=9/9	MSWD = *73.16
Total Integrated Age ±2σ				33.0254	0.0172789									K2O wt. %=2.66
Isochron Age ±2σ				32.8618	0.022807		MSWD = *48.28
(40Ar/36Ar)trapped ±2σ				313.858	2.26828
	Sample:	19L-10			Identifier:	67807
	Material:	GroundmassConcentrate
	Weight:	8.2 mg
X	01A	outlier	0.8	27.9369	0.346198	1.46284	0.0178206	35.8466	4.95344	3.83358	16.9038	4.05446	0.0506279	0.0887951	2.13e-16	0.0416921	3.30231e-05	0.00281205	5.30496e-06	807.732	0.0855765	33.6708	0.0264215	0.897466	0.00857254	3.67538	0.0242689	2.2746	0.00427806	807.468	0.0818673	33.6176	0.0185318	1.00198	0.00549345	3.7674	0.0167604	2.27185	0.00414342	0.14988	0.0249215	0.0277187	0.0143462	0.00181511	0.00658107	0.0113994	0.0175518	0.00131277	0.000155153
pX	01B	ok	1.3	33.6979	0.0585196	1.04196	0.0107719	-3399.43	15647.1	14.9757	69.3386	4.89828	0.00858486	0.258079	2.13e-16	0.14156	6.37594e-05	0.00103757	3.5574e-06	691.435	0.0755845	97.8732	0.0427228	1.32271	0.00858745	14.993	0.0239784	0.73055	0.00245819	691.158	0.0719638	97.7144	0.0233459	1.42919	0.00551668	15.0803	0.016337	0.730563	0.00242752	0.148176	0.0231135	0.0277187	0.0143462	0.00181511	0.00658107	0.0113994	0.0175518	0.00131117	0.000143277
X	01C	outlier	1.6	33.8651	0.0289911	0.993414	0.0102042	-172.25	28.9554	30.7087	88.5544	4.92281	0.00425341	0.364414	2.13e-16	0.17989	7.17534e-05	0.000387261	2.1958e-06	768.296	0.0782124	138.202	0.0532214	1.68321	0.00851992	22.201	0.0246931	0.316996	0.0016863	768.008	0.0751744	137.95	0.0267717	1.79205	0.00541097	22.3111	0.017369	0.31775	0.00167199	0.146472	0.0215868	0.0277187	0.0143462	0.00181511	0.00658107	0.0113994	0.0175518	0.00130956	0.000132625
X	01D	outlier	1.9	33.3983	0.0226231	1.22394	0.0125787	-257.176	59.4894	48.6448	91.1884	4.85433	0.00331828	0.415442	2.13e-16	0.187854	7.08813e-05	0.000298119	1.6795e-06	838.747	0.0835479	157.542	0.0572517	1.91988	0.0088724	20.5408	0.0239753	0.268059	0.00140798	838.489	0.0810176	157.255	0.0278868	2.02004	0.00595054	20.6275	0.0163325	0.26889	0.00139484	0.14477	0.0204062	0.0277187	0.0143462	0.00181511	0.00658107	0.0113994	0.0175518	0.00130796	0.000123523
pX	01E	ok	2.2	33.114	0.026798	1.53537	0.0159331	-430.035	203.781	63.1472	90.0956	4.81263	0.00393002	0.335911	2.13e-16	0.187211	7.17713e-05	0.000335102	2.11914e-06	680.508	0.0671987	127.375	0.0471247	1.56875	0.00898238	13.2388	0.02449	0.239648	0.00144159	680.218	0.0642675	127.145	0.0237513	1.67781	0.00611332	13.3189	0.017079	0.240535	0.00143026	0.143066	0.0196305	0.0277187	0.0143462	0.00181511	0.00658107	0.0113994	0.0175518	0.00130636	0.00011631
	01F	ok	3	32.978	0.0282257	1.3853	0.0143602	-418.962	198.244	76.5388	88.3446	4.79269	0.0041391	0.310182	2.13e-16	0.184336	7.26793e-05	0.000394357	2.19159e-06	638.184	0.0697691	117.622	0.0445011	1.4565	0.00851748	13.5462	0.0241674	0.263553	0.00139803	637.931	0.0670436	117.409	0.0227538	1.56355	0.00540712	13.66	0.0166131	0.264392	0.00138603	0.141354	0.0193105	0.0277187	0.0143462	0.00181511	0.00658107	0.0113994	0.0175518	0.00130475	0.000111353
	01G	ok	5	33.0098	0.039701	0.773768	0.00801611	-493.892	459.677	84.425	84.9278	4.79735	0.00582197	0.182664	2.13e-16	0.177035	8.76035e-05	0.000509993	3.05465e-06	391.322	0.0589171	69.2818	0.0326131	0.872254	0.00857994	14.2769	0.0246297	0.2121	0.00119458	391.037	0.0556062	69.1497	0.0197779	0.977511	0.00550499	14.3772	0.0172788	0.21303	0.00118363	0.139645	0.0194724	0.0277187	0.0143462	0.00181511	0.00658107	0.0113994	0.0175518	0.00130314	0.000109002
	01H	ok	7	33.006	0.085333	0.730741	0.00810969	-678.782	2229.86	87.437	81.6421	4.79679	0.0125137	0.0697661	2.13e-16	0.170205	0.000163465	0.000621189	6.59583e-06	155.457	0.0457703	26.4621	0.0241715	0.3381	0.0085132	5.77294	0.0246123	0.101635	0.00102468	155.167	0.0411171	26.4253	0.0173221	0.447293	0.00540038	5.87265	0.0172539	0.102761	0.00101595	0.137929	0.0201074	0.0277187	0.0143462	0.00181511	0.00658107	0.0113994	0.0175518	0.00130153	0.000109422
	01I	ok	10	33.156	0.0637513	0.701988	0.00736229	-750.335	1583.94	92.6982	80.3283	4.81879	0.0093496	0.121861	2.13e-16	0.166702	0.000110072	0.000665649	4.81561e-06	277.245	0.054002	46.2225	0.0291312	0.594184	0.00860782	10.4948	0.0245301	0.193761	0.00133432	276.95	0.049678	46.1324	0.0194625	0.704716	0.00554834	10.5735	0.0171364	0.194717	0.00132431	0.136213	0.0211733	0.0277187	0.0143462	0.00181511	0.00658107	0.0113994	0.0175518	0.00129991	0.000112598
	01J	ok	15	33.0742	0.0542965	0.795392	0.00826302	-735.449	1109.12	100	80.7522	4.8068	0.00796262	0.169128	2.13e-16	0.167999	9.56929e-05	0.000651303	4.09482e-06	381.811	0.059682	64.1471	0.0350974	0.822266	0.00865866	12.8533	0.0240272	0.259958	0.00156267	381.519	0.0552346	64.0102	0.0210095	0.922854	0.00562689	12.9481	0.0164085	0.260795	0.00155099	0.1345	0.022607	0.0277187	0.0143462	0.00181511	0.00658107	0.0113994	0.0175518	0.0012983	0.000118299
Integrated K/Ca ±2σ						0.906465	0.0185856	SD
Plateau Age ±2σ				33.0165	0.0547178	n=5/10	MSWD = 1.96	steps F-J
Total Integrated Age ±2σ				33.1197	0.0362059									K2O wt. %=2.32
Isochron Age ±2σ				32.8091	0.0680071		MSWD = *9.16
(40Ar/36Ar)trapped ±2σ				310.627	3.00654
[truncated: 44 more columns]

## Sheet: Summer Coon & Del Norte
SUPPLEMENTAL FILE S3-A. ANALYTICAL DATA TABLES (PYCHRON) FOR BLVC, BAUGHMAN, AND SUMMER COON VOLCANOES																		Lipman, P.W., Zimmerer, M.J., and Gilmer, A.K., 2023, Precursors to a continental-arc ignimbrite flare-up: Early central volcanoes of the San Juan Mountains, Colorado, USA: Geosphere, v. 19, https://doi.org/10.1130/GES02691.1.
	N	Tag	Power	Age	±1σ	K/Ca	±1σ	K/Cl	±1σ	Cum. %39Ar	%40Ar*	40Ar*/39ArK	±1σ	K2O	Sensitivity	39Ar/40Ar	±1σ	36Ar/40Ar	±1σ	40Ar	±1σ	39Ar	±1σ	38Ar	±1σ	37Ar	±1σ	36Ar	±1σ	40Ar	±1σ	39Ar	±1σ	38Ar	±1σ	37Ar	±1σ	36Ar	±1σ	40Ar	±1σ	39Ar	±1σ	38Ar	±1σ	37Ar	±1σ	36Ar	±1σ
			W	(Ma)	(Ma)					(%)	(%)			(wt. %)	mol/fA					(fA)		(fA)		(fA)		(fA)		(fA)		(fA)		(fA)		(fA)		(fA)		(fA)		(fA)		(fA)		(fA)		(fA)		(fA)
	Sample:	NFPCC-01			Identifier:	69533
	Material:	Hornblende
	Weight:	8.1 mg
																				Corrected1
pX	01A	ok	1.5	32.4444	1.04222	0.326165	0.00608128	438.005	107.293	1.10723	10.693	3.34776	0.108498	0.0098289	5e-16	0.0319495	0.000115472	0.00302213	1.04352e-05	69.1584	0.0429727	2.21026	0.00785854	0.0892453	0.00543759	0.83476	0.0152595	0.209921	0.000709433	69.2558	0.0339204	2.03903	0.0074564	-0.0406863	0.00534701	0.718783	0.0149056	0.209199	0.000690135	0.259909	0.026383	0.0121884	0.00179567	0.00580849	0.000988375	0.0022902	0.00326775	0.00186	9.47163e-05
pX	01B	ok	2	33.355	0.237768	0.105226	0.000287338	80.8407	1.21911	4.31591	46.3781	3.44258	0.0247644	0.0284835	5e-16	0.134872	0.000236098	0.00181283	1.0314e-05	47.5174	0.0415973	6.41985	0.00968305	0.44772	0.00521884	7.49674	0.0169814	0.0947807	0.000479272	47.6081	0.0331492	6.26531	0.00835959	0.321605	0.00512439	7.39144	0.016664	0.0954761	0.000463439	0.261208	0.025129	0.0121884	0.00179567	0.00580849	0.000988375	0.0022902	0.00326775	0.00185936	9.0177e-05
X	01C	outlier	2.5	36.3038	0.102903	0.0943497	9.65963e-05	92.2677	0.547949	14.6158	66.7307	3.74996	0.010735	0.0914322	5e-16	0.178218	0.000156206	0.00112247	5.80209e-06	115.475	0.0429453	20.6157	0.0162574	1.27211	0.0057341	26.8338	0.0173544	0.160672	0.000628802	115.6	0.0357345	20.4349	0.00845339	1.13959	0.00564827	26.7312	0.017044	0.160554	0.000612426	0.262676	0.023819	0.0121884	0.00179567	0.00580849	0.000988375	0.0022902	0.00326775	0.00185865	8.53991e-05
X	01D	outlier	3	36.2545	0.0666532	0.0933139	8.00721e-05	124.053	0.639479	30.1703	82.0385	3.74481	0.00695318	0.138077	5e-16	0.219478	0.000174383	0.000602692	4.50914e-06	141.652	0.0490977	31.1344	0.0220914	1.52097	0.00556041	40.966	0.0195231	0.132885	0.00053842	141.759	0.0435682	30.9451	0.00952547	1.39287	0.00547186	40.8555	0.0192477	0.133114	0.00052339	0.264152	0.0226362	0.0121884	0.00179567	0.00580849	0.000988375	0.0022902	0.00326775	0.00185793	8.10381e-05
X	01E	outlier	3.5	33.2911	0.0660819	0.0945585	8.23984e-05	127.988	0.803818	43.4317	87.1341	3.43593	0.00688243	0.117722	5e-16	0.25414	0.000210068	0.000429069	5.29882e-06	104.328	0.044082	26.5432	0.0186949	1.26243	0.00563717	34.4618	0.0174851	0.0847737	0.000471164	104.445	0.0383565	26.3605	0.00890242	1.13427	0.00554985	34.3695	0.017177	0.0855931	0.000457817	0.265448	0.0217255	0.0121884	0.00179567	0.00580849	0.000988375	0.0022902	0.00326775	0.0018573	7.76316e-05
X	01F	outlier	4	36.1163	0.0731209	0.091181	7.56109e-05	100.083	0.449031	58.604	79.8684	3.7304	0.00762731	0.134685	5e-16	0.214489	0.000160613	0.000676379	4.98481e-06	141.379	0.0449089	30.3721	0.0204377	1.74375	0.0058459	40.8809	0.0195772	0.143067	0.00061535	141.491	0.0397706	30.1993	0.00930828	1.63028	0.00576174	40.7905	0.0193026	0.143174	0.000600999	0.266918	0.0208592	0.0121884	0.00179567	0.00580849	0.000988375	0.0022902	0.00326775	0.00185659	7.43232e-05
X	01G	outlier	4.5	34.7995	0.0659083	0.0928749	8.52074e-05	121.7	0.839615	70.1161	91.9923	3.5931	0.00687001	0.102193	5e-16	0.256579	0.000217265	0.000264248	5.29817e-06	89.7069	0.0396823	23.0434	0.0164934	1.13413	0.0056681	30.4435	0.017297	0.0591031	0.000400898	89.8427	0.0343824	22.88	0.00955775	1.01765	0.00558127	30.3552	0.0169855	0.0602346	0.000389118	0.269566	0.0198126	0.0121884	0.00179567	0.00580849	0.000988375	0.0022902	0.00326775	0.0018553	7.00947e-05
pX	01H	ok	5	34.0595	0.0783704	0.0939592	0.000114812	131.581	1.51485	77.5087	89.3747	3.51598	0.00816571	0.0656245	5e-16	0.254742	0.000272327	0.000353067	6.15078e-06	58.0209	0.036476	14.797	0.0126868	0.689099	0.00565007	19.3211	0.0166941	0.042939	0.00031719	58.1521	0.0307831	14.6454	0.00919436	0.558857	0.00556295	19.2157	0.0163712	0.0442666	0.000305207	0.270863	0.0195678	0.0121884	0.00179567	0.00580849	0.000988375	0.0022902	0.00326775	0.00185467	6.89388e-05
	01I	ok	5.5	33.7469	0.0772415	0.0920937	0.000118351	113.658	1.1964	84.347	94.4204	3.4834	0.00804671	0.060704	5e-16	0.271679	0.000312557	0.000181493	6.35814e-06	50.3318	0.0366738	13.6885	0.0120763	0.70777	0.00552751	18.2317	0.0169105	0.0303536	0.000280458	50.4515	0.0310539	13.5088	0.0088817	0.581992	0.00543843	18.1432	0.0165918	0.0318385	0.00026819	0.27216	0.0195096	0.0121884	0.00179567	0.00580849	0.000988375	0.0022902	0.00326775	0.00185403	6.84311e-05
	01J	ok	6	33.9388	0.106431	0.0926348	0.000186378	109.17	1.98059	88.3538	95.1569	3.5034	0.0110887	0.0355683	5e-16	0.272237	0.000467322	0.000156496	8.49203e-06	29.4306	0.0351164	8.02035	0.00980881	0.427276	0.00582762	10.6185	0.0168598	0.0169692	0.000232392	29.5469	0.0291093	7.85668	0.00837621	0.306671	0.0057432	10.5482	0.0165401	0.0186132	0.000218952	0.27347	0.019642	0.0121884	0.00179567	0.00580849	0.000988375	0.0022902	0.00326775	0.0018534	6.8591e-05
	01K	ok	10	33.6538	0.0756089	0.0861052	0.000100011	89.8067	0.622599	96.5612	94.8903	3.47371	0.00787623	0.0728567	5e-16	0.273799	0.000306627	0.000165496	6.298e-06	59.9415	0.0413397	16.4333	0.014365	1.01845	0.00549126	23.3829	0.0177102	0.0371765	0.000322068	60.1012	0.0346089	16.2845	0.0082833	0.903234	0.00540158	23.2973	0.0174061	0.0385709	0.000308141	0.279636	0.0226097	0.0121884	0.00179567	0.00580849	0.000988375	0.0022902	0.00326775	0.0018504	7.78121e-05
	01L	ok	15	33.9354	0.154078	0.0828845	0.000182101	65.7825	0.823303	100	77.8793	3.50305	0.0160529	0.0305266	5e-16	0.222736	0.000435257	0.000743633	1.05791e-05	30.8596	0.0388241	6.88658	0.0102167	0.553307	0.00569106	10.1764	0.0163599	0.034792	0.000312802	30.9751	0.0307809	6.72712	0.00865789	0.43348	0.00560458	10.0892	0.0160302	0.0362125	0.000297786	0.28096	0.023661	0.0121884	0.00179567	0.00580849	0.000988375	0.0022902	0.00326775	0.00184975	8.13191e-05
Integrated K/Ca ±2σ						0.0884388	0.000133881	SD
Np Plateau Age								steps I-L
Total Integrated Age ±2σ				34.8236	0.0570748									K2O wt. %=0.89
Isochron Age ±2σ				33.85	0.0828296		MSWD = *3.94
(40Ar/36Ar)trapped ±2σ				293.781	1.81529
	Sample:	SMCN-01			Identifier:	69530
	Material:	Hornblende
	Weight:	8.3 mg
X	01A	outlier	1.5	24.1165	2.55425	0.201969	0.00274541	99.0917	6.35963	0.915928	2.38442	2.48703	0.265147	0.00858026	5e-16	0.00958818	3.96262e-05	0.0033034	6.52938e-06	205.749	0.0480256	1.97508	0.00813448	0.240242	0.00560338	1.21574	0.0157175	0.681023	0.00133372	206.369	0.0424133	1.81209	0.0078199	0.115081	0.00551552	1.11233	0.0153741	0.677086	0.00129022	0.814737	0.0225292	0.0121884	0.00179567	0.00580849	0.000988375	0.0022902	0.00326775	0.00445685	0.00010277
X	01B	outlier	2	36.3387	0.364266	0.135044	0.000648723	34.0112	0.370101	2.77236	37.6217	3.76001	0.0380664	0.0173908	5e-16	0.100142	0.000231122	0.00210987	1.18725e-05	39.9586	0.034575	4.00665	0.0085413	0.58491	0.005502	3.6842	0.0158072	0.0885284	0.000467017	40.6173	0.0289831	3.83521	0.00796434	0.44353	0.0054125	3.54645	0.0154658	0.0921522	0.00045158	0.851432	0.0188523	0.0121884	0.00179567	0.00580849	0.000988375	0.0022902	0.00326775	0.00471064	8.84252e-05
	01C	ok	2.5	34.3726	0.13109	0.110299	0.00013351	28.5837	0.0676304	10.2514	52.9836	3.55466	0.0136844	0.0700625	5e-16	0.149242	0.000134971	0.00158882	6.08998e-06	108.064	0.0405066	16.1511	0.013223	2.72245	0.00543861	18.1691	0.0161007	0.192642	0.000636623	108.748	0.0354461	15.9806	0.00883023	2.58272	0.00534805	18.0373	0.0157656	0.195145	0.000617806	0.875468	0.019605	0.0121884	0.00179567	0.00580849	0.000988375	0.0022902	0.00326775	0.00487689	9.41813e-05
X	01D	outlier	3	34.404	0.0534622	0.111608	9.75886e-05	27.6682	0.0397413	23.9589	93.253	3.55794	0.00558099	0.12841	5e-16	0.262679	0.000204916	0.000221328	4.26173e-06	112.635	0.0440722	29.6005	0.0198087	5.08575	0.00581678	32.9046	0.0183716	0.0632321	0.000394964	113.308	0.0380502	29.4343	0.0094423	4.94648	0.0057322	32.7737	0.0180786	0.0674889	0.000374143	0.89669	0.0222384	0.0121884	0.00179567	0.00580849	0.000988375	0.0022902	0.00326775	0.00502367	0.000108037
	01E	ok	3.5	34.0682	0.0614686	0.110127	8.31321e-05	28.9815	0.0338233	42.8366	80.0489	3.52289	0.00641562	0.176843	5e-16	0.227662	0.000158304	0.000669961	4.39285e-06	178.924	0.0493053	40.7668	0.0258328	6.7269	0.00579818	45.9098	0.0186204	0.173135	0.000686951	179.544	0.0445467	40.5786	0.0108017	6.58704	0.00571332	45.7618	0.0183314	0.175747	0.000667914	0.833625	0.0211331	0.0121884	0.00179567	0.00580849	0.000988375	0.0022902	0.00326775	0.00474047	0.00010171
	01F	ok	4	33.8261	0.0687286	0.111672	0.000119927	29.2755	0.0638026	51.7467	93.6383	3.49762	0.00717241	0.083469	5e-16	0.268326	0.00024391	0.000208109	5.79265e-06	71.6775	0.0390284	19.2409	0.0138827	3.13785	0.00586574	21.3662	0.0168947	0.0397831	0.000374723	72.1794	0.0342518	19.0735	0.00812441	2.99332	0.00578187	21.233	0.0165757	0.0436537	0.000359663	0.759244	0.0187091	0.0121884	0.00179567	0.00580849	0.000988375	0.0022902	0.00326775	0.00436137	8.60912e-05
	01G	ok	4.5	34.1808	0.0648532	0.109148	0.000124563	27.4731	0.0550698	60.6349	95.7134	3.53464	0.00676929	0.0832631	5e-16	0.271407	0.00025576	0.000137643	5.38106e-06	70.691	0.0392237	19.1949	0.0144938	3.31833	0.0056126	21.8031	0.0185472	0.0351352	0.000333948	71.1299	0.034361	19.0133	0.00895608	3.17194	0.00552488	21.6742	0.018257	0.0386963	0.000319468	0.685196	0.0189163	0.0121884	0.00179567	0.00580849	0.000988375	0.0022902	0.00326775	0.00398398	8.10364e-05
	01H	ok	5	34.0109	0.0718474	0.111114	0.000136175	24.748	0.0537946	68.2845	94.8671	3.51691	0.00749863	0.0716595	5e-16	0.270361	0.000280784	0.000166376	5.94603e-06	61.0742	0.0397623	16.5189	0.0132511	3.14697	0.00584824	18.4298	0.0169786	0.0316739	0.000328567	61.4483	0.0333423	16.3272	0.0086088	3.00107	0.00576412	18.2697	0.0166612	0.0348923	0.000312069	0.611149	0.021664	0.0121884	0.00179567	0.00580849	0.000988375	0.0022902	0.00326775	0.00360658	8.82757e-05
	01I	ok	5.5	34.3255	0.0837554	0.101634	0.000113127	20.5816	0.0361565	77.1352	82.8316	3.54975	0.00874297	0.0829122	5e-16	0.233805	0.000224532	0.000575465	6.22445e-06	81.6882	0.0423421	19.1185	0.0153396	4.33543	0.00626131	23.3057	0.0178469	0.0742007	0.000468894	81.9805	0.0356236	18.9124	0.00907964	4.19038	0.00618281	23.1588	0.0175452	0.076469	0.00045308	0.549268	0.0228871	0.0121884	0.00179567	0.00580849	0.000988375	0.0022902	0.00326775	0.00318109	9.20726e-05
	01J	ok	6	33.819	0.0795791	0.0979664	0.000138499	20.9875	0.0473774	83.1455	96.5568	3.49688	0.00830472	0.0563032	5e-16	0.276768	0.000352316	0.000108889	6.52419e-06	46.8781	0.0393233	12.9845	0.0123207	2.8857	0.00548322	16.4162	0.0170889	0.0242962	0.000272977	47.1699	0.0335892	12.7789	0.00857343	2.7323	0.0053934	16.262	0.0167736	0.0271308	0.000256656	0.560742	0.0204472	0.0121884	0.00179567	0.00580849	0.000988375	0.0022902	0.00326775	0.00312641	8.20979e-05
	01K	ok	6.5	33.8746	0.157581	0.0967041	0.000292608	22.908	0.135461	85.5994	90.6443	3.50268	0.0164454	0.0229877	5e-16	0.259352	0.000653768	0.00030989	1.1907e-05	20.4218	0.0366071	5.30163	0.00931709	1.08602	0.00569767	6.78889	0.0166286	0.0142451	0.000235079	20.7066	0.0311696	5.10799	0.00833717	0.9332	0.00561129	6.64832	0.0163043	0.0171456	0.000219056	0.572387	0.0191972	0.0121884	0.00179567	0.00580849	0.000988375	0.0022902	0.00326775	0.00307091	7.67816e-05
X	01L	outlier	15	33.7259	0.0631528	0.102945	9.6506e-05	22.8166	0.0304054	100	87.1296	3.48717	0.00659017	0.134903	5e-16	0.250386	0.000218963	0.000429317	4.86526e-06	124.127	0.0422442	31.1055	0.0248724	6.39917	0.00610817	37.4195	0.0180718	0.0969404	0.000517573	124.417	0.0375176	30.8611	0.0100364	6.25941	0.00602768	37.2997	0.0177739	0.0987654	0.000504108	0.58398	0.0194165	0.0121884	0.00179567	0.00580849	0.000988375	0.0022902	0.00326775	0.00301566	7.72903e-05
Integrated K/Ca ±2σ						0.107479	8.79675e-05	SD
No Plateau Age
Total Integrated Age ±2σ				34.0261	0.0677844									K2O wt. %=0.94
Isochron Age ±2σ				33.9702	0.0713277		MSWD = *4.89
(40Ar/36Ar)trapped ±2σ				300.095	2.52889
	Sample:	SMCN-03			Identifier:	69531
	Material:	Hornblende
	Weight:	8.2 mg
	01A	ok	1.5	34.607	0.119797	0.141923	0.00010572	38.4302	0.0463683	19.3116	40.7709	3.57646	0.0124978	0.221031	5e-16	0.114108	7.31302e-05	0.00200304	3.30096e-06	440.714	0.0647718	50.3409	0.0312754	6.56762	0.00565809	43.8812	0.0178799	0.933193	0.00140149	442.088	0.0609352	50.0873	0.0100393	6.41451	0.00557109	43.7392	0.0175788	0.928439	0.00133708	1.64691	0.021961	0.0121884	0.00179567	0.00580849	0.000988375	0.0022902	0.00326775	0.00674038	0.000125146
X	01B	outlier	2	31.3661	0.682746	0.155523	0.00117866	55.1517	1.31348	20.4349	16.1454	3.23865	0.0711013	0.0128571	5e-16	0.0498731	0.000152969	0.00283749	1.08088e-05	58.6216	0.0378229	2.92761	0.0087545	0.301939	0.0054987	2.32888	0.0161731	0.168982	0.000623617	59.8108	0.0319973	2.74285	0.00837437	0.138727	0.00540914	2.20357	0.0158395	0.173176	0.000602579	1.48321	0.0201679	0.0121884	0.00179567	0.00580849	0.000988375	0.0022902	0.00326775	0.0062791	0.00011211
	01C	ok	2.5	34.2807	0.239341	0.139159	0.000539065	33.5968	0.273929	22.4754	57.2265	3.54241	0.0249648	0.0233544	5e-16	0.161767	0.000318495	0.00144485	1.26212e-05	32.8602	0.0363603	5.31932	0.00862171	0.772934	0.00553741	4.72702	0.016579	0.0529475	0.000408516	33.921	0.0308506	5.12419	0.00783362	0.604865	0.00544849	4.57362	0.0162538	0.0581953	0.000389529	1.34807	0.0192436	0.0121884	0.00179567	0.00580849	0.000988375	0.0022902	0.00326775	0.00589831	0.000103432
X	01D	outlier	3	36.0202	0.148294	0.115628	0.000195798	29.8104	0.102059	26.8351	60.6565	3.72394	0.0154826	0.0498997	5e-16	0.163107	0.000182383	0.00132859	7.81172e-06	69.6342	0.0382972	11.3713	0.0110119	1.83955	0.00545692	12.1531	0.0168038	0.106606	0.000531111	70.549	0.0333062	11.1767	0.00864204	1.68356	0.00536667	12.0067	0.016483	0.11076	0.000514168	1.1949	0.0189044	0.0121884	0.00179567	0.00580849	0.000988375	0.0022902	0.00326775	0.00546671	9.65638e-05
X	01E	outlier	3.5	35.7098	0.0993544	0.111489	0.000110854	27.6274	0.051899	35.5222	62.6455	3.69153	0.0103714	0.0994286	5e-16	0.169944	0.000133925	0.00126107	5.25871e-06	133.177	0.0430175	22.6607	0.0161946	3.92663	0.00616092	25.1106	0.0172419	0.197103	0.000665506	133.941	0.0384186	22.4614	0.0092568	3.77745	0.00608112	24.9632	0.0169294	0.199717	0.000646739	1.04194	0.0193526	0.0121884	0.00179567	0.00580849	0.000988375	0.0022902	0.00326775	0.00503568	9.35117e-05
X	01F	outlier	4	34.8481	0.06671	0.109503	9.21864e-05	27.1924	0.0380711	47.4272	80.2078	3.6016	0.00696043	0.136259	5e-16	0.22312	0.000166862	0.000664674	4.66917e-06	139.073	0.0466381	31.0565	0.0206085	5.43457	0.00601775	35.0302	0.0179877	0.133281	0.000579103	139.705	0.0418726	30.8337	0.00935701	5.27857	0.00593603	34.8737	0.0176883	0.136252	0.000562036	0.88877	0.0205377	0.0121884	0.00179567	0.00580849	0.000988375	0.0022902	0.00326775	0.00460408	9.46372e-05
	01G	ok	4.5	34.4863	0.0719167	0.110622	9.23017e-05	26.6667	0.0356691	59.8883	72.4878	3.56387	0.0075022	0.142625	5e-16	0.203746	0.000149795	0.000926821	4.53945e-06	159.386	0.0481319	32.5064	0.021644	5.80139	0.00602496	36.2895	0.0180818	0.189986	0.000655588	159.874	0.0426319	32.2991	0.0092285	5.65417	0.00594334	36.1525	0.0177841	0.191825	0.000636105	0.735603	0.0223427	0.0121884	0.00179567	0.00580849	0.000988375	0.0022902	0.00326775	0.00417248	9.98056e-05
	01H	ok	5	33.9204	0.0621659	0.109791	0.000109617	27.2025	0.0486119	68.8599	90.9629	3.50483	0.00648301	0.102684	5e-16	0.260105	0.000230069	0.000299066	4.94721e-06	89.9305	0.0405385	23.4039	0.0176699	4.08604	0.00600081	26.3127	0.017057	0.0576664	0.000386616	90.1512	0.0326943	23.2128	0.00895988	3.93717	0.00591886	26.1617	0.0167411	0.0603291	0.000366542	0.46853	0.0239678	0.0121884	0.00179567	0.00580849	0.000988375	0.0022902	0.00326775	0.00337142	0.000104993
X	01I	outlier	5.5	33.6482	0.0604586	0.111075	0.000109174	27.9691	0.0483317	78.6346	89.8607	3.47645	0.00630402	0.111877	5e-16	0.259049	0.000226638	0.000336475	4.76737e-06	98.38	0.0416645	25.4981	0.0193687	4.33952	0.00607689	28.3325	0.0175281	0.0662245	0.000404748	98.6237	0.0355635	25.2956	0.00913561	4.19223	0.00599597	28.208	0.0172208	0.0687522	0.000387751	0.47574	0.0217065	0.0121884	0.00179567	0.00580849	0.000988375	0.0022902	0.00326775	0.00334212	9.42678e-05
	01J	ok	6	33.8405	0.0756593	0.101589	0.0001195	29.4886	0.0736454	85.1411	89.3	3.49651	0.00788984	0.0744711	5e-16	0.255949	0.000266493	0.000355571	5.974e-06	66.2782	0.0375225	16.9779	0.0147194	2.75224	0.00584282	20.6175	0.0162636	0.0476302	0.000355879	66.4987	0.0316423	16.7983	0.00876559	2.60716	0.00575861	20.4921	0.0159319	0.0503634	0.000340372	0.482951	0.0201667	0.0121884	0.00179567	0.00580849	0.000988375	0.0022902	0.00326775	0.00331283	8.60103e-05
	01K	ok	6.5	34.0247	0.0918343	0.105483	0.00014865	28.5538	0.0794437	90.3016	85.6349	3.51571	0.00957754	0.0590643	5e-16	0.244079	0.000287288	0.000480158	6.98924e-06	55.1172	0.0385759	13.4638	0.012645	2.24972	0.00535898	15.746	0.0164415	0.0448462	0.000360849	55.3872	0.0332724	13.2732	0.00804441	2.10443	0.00526705	15.5976	0.0161135	0.0475845	0.000346698	0.49014	0.0195204	0.0121884	0.00179567	0.00580849	0.000988375	0.0022902	0.00326775	0.00328362	8.09892e-05
	01L	ok	10	34.045	0.0690041	0.120001	0.000157407	30.4319	0.072345	97.0121	94.1193	3.51783	0.00719663	0.0768059	5e-16	0.268155	0.000297042	0.000191799	5.43438e-06	65.2516	0.0413788	17.5009	0.0157742	2.75414	0.0054663	17.9959	0.0170518	0.0335784	0.000320437	65.5314	0.0363061	17.3129	0.00889383	2.60955	0.0053762	17.8688	0.0167357	0.0364265	0.000306024	0.49735	0.0198511	0.0121884	0.00179567	0.00580849	0.000988375	0.0022902	0.00326775	0.00325433	7.97859e-05
X	01M	outlier	15	34.6279	0.0956227	0.231297	0.00100045	51.0506	0.435826	100	95.5021	3.57864	0.00997593	0.0341977	5e-16	0.26747	0.000466819	0.000144916	6.93498e-06	29.1273	0.0352628	7.78114	0.00971816	0.769967	0.00564448	4.15661	0.0171831	0.00909384	0.000197536	29.3899	0.0282432	7.60511	0.00746627	0.628935	0.00555727	4.05871	0.0168695	0.0122094	0.000176729	0.50455	0.0211137	0.0121884	0.00179567	0.00580849	0.000988375	0.0022902	0.00326775	0.00322508	8.25816e-05
Integrated K/Ca ±2σ						0.118996	9.87127e-05	SD
No Plateau Age
Total Integrated Age ±2σ				34.4628	0.0638764									K2O wt. %=1.14
Isochron Age ±2σ				33.9732	0.0755135		MSWD = *6.50
(40Ar/36Ar)trapped ±2σ				299.847	1.18473
	Sample:	SMCN-04			Identifier:	69532
	Material:	Hornblende
	Weight:	8.5 mg
X	01A	outlier	1.5	34.4249	1.37778	0.956314	0.0541858	495.977	131.26	0.912871	7.64818	3.55467	0.14361	0.00946231	5e-16	0.0215198	7.82224e-05	0.00312523	8.9561e-06	103.701	0.0454872	2.23092	0.0080453	0.108487	0.00523896	0.288456	0.0163004	0.324366	0.000917424	104.014	0.0366735	2.05627	0.00765845	-0.0306421	0.00514489	0.145976	0.0159695	0.323428	0.00089272	0.509507	0.0269098	0.0121884	0.00179567	0.00580849	0.000988375	0.0022902	0.00326775	0.00306343	0.000102368
	01B	ok	2	41.726	0.341653	0.142587	0.000913435	47.1314	0.890281	2.26783	54.9044	4.31721	0.0357537	0.0140447	5e-16	0.127312	0.000386562	0.00152408	1.36164e-05	26.0408	0.0397536	3.31833	0.00867487	0.359366	0.00577375	2.87043	0.0167367	0.043002	0.000347628	26.3164	0.0304676	3.14072	0.00815333	0.21509	0.00568852	2.74913	0.0164146	0.0454697	0.000328965	0.495325	0.0255358	0.0121884	0.00179567	0.00580849	0.000988375	0.0022902	0.00326775	0.00299549	9.70808e-05
X	01C	outlier	2.5	37.3473	0.146872	0.110896	0.000202049	29.1987	0.117867	6.32928	66.1234	3.85952	0.0153333	0.0420986	5e-16	0.171573	0.000219093	0.00114317	8.05947e-06	57.9417	0.0392203	9.95367	0.0107174	1.63816	0.00578421	11.061	0.0161759	0.0791128	0.000454667	58.1836	0.0308068	9.77304	0.00822926	1.4986	0.00569914	10.9673	0.0158424	0.0810698	0.000438575	0.481186	0.0242729	0.0121884	0.00179567	0.00580849	0.000988375	0.0022902	0.00326775	0.00292775	9.21729e-05
	01D	ok	3	35.1961	0.0709697	0.10723	0.000118914	27.5858	0.0511414	14.8055	87.8391	3.63507	0.00740048	0.0878599	5e-16	0.242137	0.000222917	0.000405461	5.30763e-06	85.7355	0.0426184	20.7756	0.0159753	3.58253	0.00547348	23.8697	0.0189495	0.0626966	0.00040813	85.9872	0.0358176	20.5966	0.00880739	3.44673	0.0053835	23.758	0.0186656	0.0647834	0.00039283	0.466538	0.0230961	0.0121884	0.00179567	0.00580849	0.000988375	0.0022902	0.00326775	0.00285758	8.75368e-05
	01E	ok	3.5	34.3759	0.052022	0.106172	8.7909e-05	27.977	0.0379789	28.2874	96.5445	3.54957	0.00542225	0.139745	5e-16	0.272615	0.000210468	0.000109421	4.30043e-06	121.152	0.0447787	33.0457	0.0222029	5.61691	0.00592837	38.3384	0.0183632	0.0581989	0.000411602	121.401	0.0389404	32.8676	0.00894627	5.49134	0.0058454	38.1996	0.0180701	0.0602761	0.00039729	0.45242	0.0221083	0.0121884	0.00179567	0.00580849	0.000988375	0.0022902	0.00326775	0.00278994	8.35705e-05
	01F	ok	4	34.1226	0.0477034	0.102815	7.68164e-05	29.4425	0.0363304	44.1835	97.4704	3.52317	0.00497144	0.16477	5e-16	0.277303	0.000202223	7.7884e-05	3.98463e-06	140.437	0.0450541	38.9674	0.0252889	6.31794	0.0058588	46.6727	0.017025	0.0656114	0.000403207	140.673	0.0397101	38.7865	0.00993331	6.19225	0.00577483	46.548	0.0167085	0.06754	0.000389366	0.438281	0.0212834	0.0121884	0.00179567	0.00580849	0.000988375	0.0022902	0.00326775	0.0027222	8.01665e-05
X	01G	outlier	4.5	34.2446	0.0558621	0.105359	8.94327e-05	36.3058	0.0643731	56.8527	93.3338	3.53588	0.00582208	0.131322	5e-16	0.264552	0.000202252	0.000218538	4.58112e-06	117.312	0.0422963	31.0546	0.0207566	4.16235	0.00603868	36.2888	0.0188141	0.0680338	0.000443864	117.553	0.037165	30.8852	0.0102502	4.03053	0.00595724	36.1751	0.0185282	0.0697895	0.000431178	0.409515	0.0201926	0.0121884	0.00179567	0.00580849	0.000988375	0.0022902	0.00326775	0.00258439	7.53038e-05
	01H	ok	5	34.3627	0.0530099	0.105958	9.00025e-05	25.777	0.0361042	68.9087	94.183	3.54819	0.00552518	0.124966	5e-16	0.266036	0.000200336	0.000189695	4.32305e-06	111.012	0.0399996	29.551	0.0193707	5.42063	0.0060784	34.332	0.0183881	0.0613543	0.000385009	111.26	0.0346542	29.3732	0.00886389	5.29439	0.0059975	34.2474	0.0180954	0.0631273	0.000372325	0.395376	0.0199763	0.0121884	0.00179567	0.00580849	0.000988375	0.0022902	0.00326775	0.00251665	7.40595e-05
	01I	ok	5.5	34.7317	0.0679897	0.104393	0.000113631	25.4251	0.0490822	76.6107	93.6446	3.58665	0.00708794	0.0798338	5e-16	0.261669	0.000247938	0.000208073	5.4586e-06	72.1004	0.0399218	18.8794	0.0143934	3.50789	0.00569366	22.2581	0.0171746	0.0411279	0.00034624	72.2879	0.0345607	18.7122	0.00898427	3.38399	0.00560722	22.1521	0.0168608	0.0430774	0.00033362	0.381237	0.0199826	0.0121884	0.00179567	0.00580849	0.000988375	0.0022902	0.00326775	0.00244891	7.363e-05
	01J	ok	6	34.3092	0.104525	0.0982482	0.000195896	26.4421	0.115846	79.991	96.3057	3.54261	0.0108943	0.035039	5e-16	0.272474	0.000468387	0.000117524	8.25682e-06	30.3927	0.036816	8.28792	0.0100186	1.48424	0.00575581	10.3785	0.0163617	0.0157461	0.000234395	30.5757	0.0307716	8.12241	0.00848531	1.35555	0.00567031	10.2519	0.0160321	0.0179354	0.000219273	0.367055	0.020212	0.0121884	0.00179567	0.00580849	0.000988375	0.0022902	0.00326775	0.00238097	7.4032e-05
	01K	ok	6.5	33.9712	0.115317	0.102834	0.000256051	33.4775	0.223832	82.7871	98.9257	3.50739	0.0120168	0.0289827	5e-16	0.282723	0.000583734	2.83666e-05	9.14924e-06	24.2303	0.0361375	6.85429	0.00969833	0.987837	0.005847	8.20057	0.0167153	0.0102911	0.000209606	24.3962	0.0296522	6.68151	0.00850812	0.85713	0.00576286	8.07555	0.0163928	0.0124827	0.000192824	0.352916	0.0206559	0.0121884	0.00179567	0.00580849	0.000988375	0.0022902	0.00326775	0.00231324	7.52498e-05
	01L	ok	10	34.1227	0.0527693	0.102739	8.56444e-05	27.4403	0.0436501	96.1662	96.6007	3.52318	0.00549938	0.13868	5e-16	0.274822	0.000220493	0.000107454	4.37266e-06	119.265	0.0423463	32.7974	0.0233957	5.67526	0.0072882	39.2693	0.0167121	0.0588993	0.000405975	119.425	0.0365987	32.615	0.00975207	5.54674	0.00722087	39.1619	0.0163895	0.0604234	0.000392885	0.338777	0.0213012	0.0121884	0.00179567	0.00580849	0.000988375	0.0022902	0.00326775	0.0022455	7.72447e-05
	01M	ok	15	34.2327	0.0944632	0.104309	0.000193849	24.4251	0.0870938	100	97.8452	3.53464	0.00984512	0.0397389	5e-16	0.277466	0.000441974	6.5167e-05	7.54573e-06	33.8506	0.0374956	9.39763	0.0106629	1.81161	0.00566254	11.0816	0.0162206	0.01524	0.000237009	34.0083	0.0302693	9.22912	0.00835809	1.68964	0.00557561	10.9846	0.015888	0.0172299	0.000219939	0.324659	0.0221289	0.0121884	0.00179567	0.00580849	0.000988375	0.0022902	0.00326775	0.00217786	7.99541e-05
Integrated K/Ca ±2σ						0.104742	7.41051e-05	SD
No Plateau Age
Total Integrated Age ±2σ				34.5824	0.0474264									K2O wt. %=1.04
Isochron Age ±2σ				33.986	0.0630562		MSWD = *2.64
(40Ar/36Ar)trapped ±2σ				366.08	6.38099
[truncated: 44 more columns]

## Sheet: Footnotes
Notes:
X preceding sample ID denotes analyses excluded from plateau or weighted mean age calculations.
i preceding sample ID denotes analyses excluded from isochron age calculations.
Isotopic ratios corrected for blank, radioactive decay, and detector intercalibration data (ARGUS VI and Helix data).
Errors quoted for individual analyses includes analytical errors, interfering reactions, and J uncertainties.
Age calculations:
Ages calculated relative to neutron flux monitor Fish Canyon Tuff Sanidine (FC-2). Assigned age = 28.201 Ma (Kuiper et al., 2008)																																					Source of spectrometer sensitivity value and error	Data file
40K Decay Constant (LambdaK total) = 5.463e-10/a (Min et al., 2000)																																					--- Source of J and use of J Adjustment Table ---
Integrated age calculated by summing isotopic measurements of all steps.																																					--- Minor irradiation parameters (see also Irradiation Data File) ---
Integrated age error calculated by quadratically combining errors of isotopic measurements of all steps.																																					(38Ar/37Ar)Ca	0.00014 ± 0
Plateau age is inverse-variance-weighted mean of selected steps.
Plateau age error is inverse-variance-weighted mean error (Taylor, 1982) times root MSWD where MSWD>1.
Plateau error is weighted error of Taylor (1982).
Mean age is weighted mean age of Taylor (1982). Mean age error is weighted error of the mean multiplied by the root of the MSWD
where MSWD >1 , and also incorporates uncertainty in J factors and irradiation correction uncertainties.
MSWD values are calculated for n-1 degrees of freedom for plateau, weighted mean, and isochron ages.
Isochron ages, 40Ar/36Ar ratios, and MSWD values calculated from regression results obtained by the methods of York (1969).
Isotopic abundances after Steiger and Jäger (1977).
Weight percent K2O calculated from 39Ar signal, sample weight, and instrument sensitivity.
Mean age errors reported at 2-sigma. All other errors at 1-sigma.
ICL2(CDD) = Measured 40Ar/36Ar divided by 295.5
ICH1 = Measured 40Ar/39Ar divided by an in-house cocktail with an 40Ar/39Ar ratio of 6.71
Sample preparation and irradiation:
Concentrated groundmass and mineral separates prepared from bulk samples using crushing, grinding, Frantz magnetic separation,
acid washing (10% HCl to remove CaCO2 and 10% HF to remove glass), heavy density liquid techniques, and hand-picking.
Samples were loaded into machined Al discs and irradiated in the NM-297, 303, 306, 309, 312, 316, and 322
positions at the USGS or OSU Triga Reactor along with the neutron flux monitor Fish Canyon Tuff sanidine FC-2.
Instrumentation:
Isotopic ratios determined with ARGUS VI (sanidine) or Helix MC Plus (groundmass concentrate, biotite, and hornblende)
Single crystals of sanidine were fused or step-heated using a focused CO2 laser.
Groundmass, biotite, and hornblende were step-heated (30-60 sec. per step) with a 75 W Photon Machines 810 nm diode laser
All mass spectrometers were on line with an automated all-metal extraction system
Reactive gases removed by reaction with 1 SAES GP-50, D-50, and/or NP-10 getter(s).
Gas (except from sanidine) also exposed to cold finger operated at -140°C.
Thermo-Fisher Scientific Helix MC Plus mass spectrometer
System = Felix
Multi-collector configuration: 40Ar-H2, 39Ar-H1, 38Ar-AX, 37Ar-L1, 36Ar-L2
Amplification (all irradiations): H2 and L1 1E12 Ohm Faraday, H1 and Ax 1E13 Ohm Faraday, L2 CDD ion counter, deadtime 20ns
Thermo-Fisher Scientific ARGUS VI mass spectrometer																																					--- Atmospheric argon ratios and discrimination ---
System = Jan																																					(40Ar/36Ar)atm	295.5 ± 0.5
Multi-collector configuration: 40Ar-H1, 39Ar-Ax, 38Ar-L1, 37Ar-L2, 36Ar-L3
Amplification (NM 283, 290, 293): H1, Ax, L2 1E13 Ohm Faraday, L1 1E14 ohm Faraday, L3 - CDD ion counter, dead time 14 nS.
Amplification (NM 263): H1, L1, L2 1E12 Ohm Faraday, Ax 1E13 ohm Faraday, L3 - CDD ion counter, dead time 14 nS.
Analytical Parameters:
Felix (Helix MC PIus) Mass Spectrometer sensitivity = 4E-16 mol/fA
Jan (ARGUS VI) Mass Spectrometer sensitivity = 8E-17 mol/fA
J-factors determined to a precision of 0.01 to 0.03% by CO2 laser fusion of typically 6 FC-2 crystals from multiple radial positions
Correction factors for interfering nuclear reactions were determined using K-glass and CaF2.
References
Kuiper, K. F., Deino, A., Hilgen, F. J., Krijgsman, W., Renne, P. R., and Wijbrans, J. R., 2008, Synchronizing rock clocks of earth history: Science, v. 320, p. 500-504.
Min, K., Mundil, R., Renne, P. L., and Ludwig, K.R., 2000, A test for systematic errors in 40Ar/39Ar geochronology through comparison with U/Pb analysis of a 1.1-Ga rhyolite: Geochimica et Cosmochimica Acta, v. 64, p. 73-98.
Taylor, J. R., 1982, An Introduction to Error Analysis: The Study of Uncertainties in Physical Measurements., University Science Books, Mills Valley, California, 270 p.
Steiger, R.H., and Jager, E., 1977. Subcommission on geochronology: convention on the use of decay constants in geo- and cosmochronology: Earth and Planetary Science Letters, v. 36, p. 359–362.
York, D., 1969, Least squares fitting of a straight line with correlated errors, Earth and Planetary Science Letters, v. 5, p. 320-324.
