# Supplementary material
Source: publisher figshare collection journal article supplement (https://gsapubs.figshare.com/articles/dataset/_/24442948)
Supplement: Supplementary file 2 [file 1]

SUPPLEMENTAL FILE S3-C. S3-D. PLATEAU AND ISOCHRON PLOTS FOR SUMMER COON AND DEL NORTE VOLCANOES

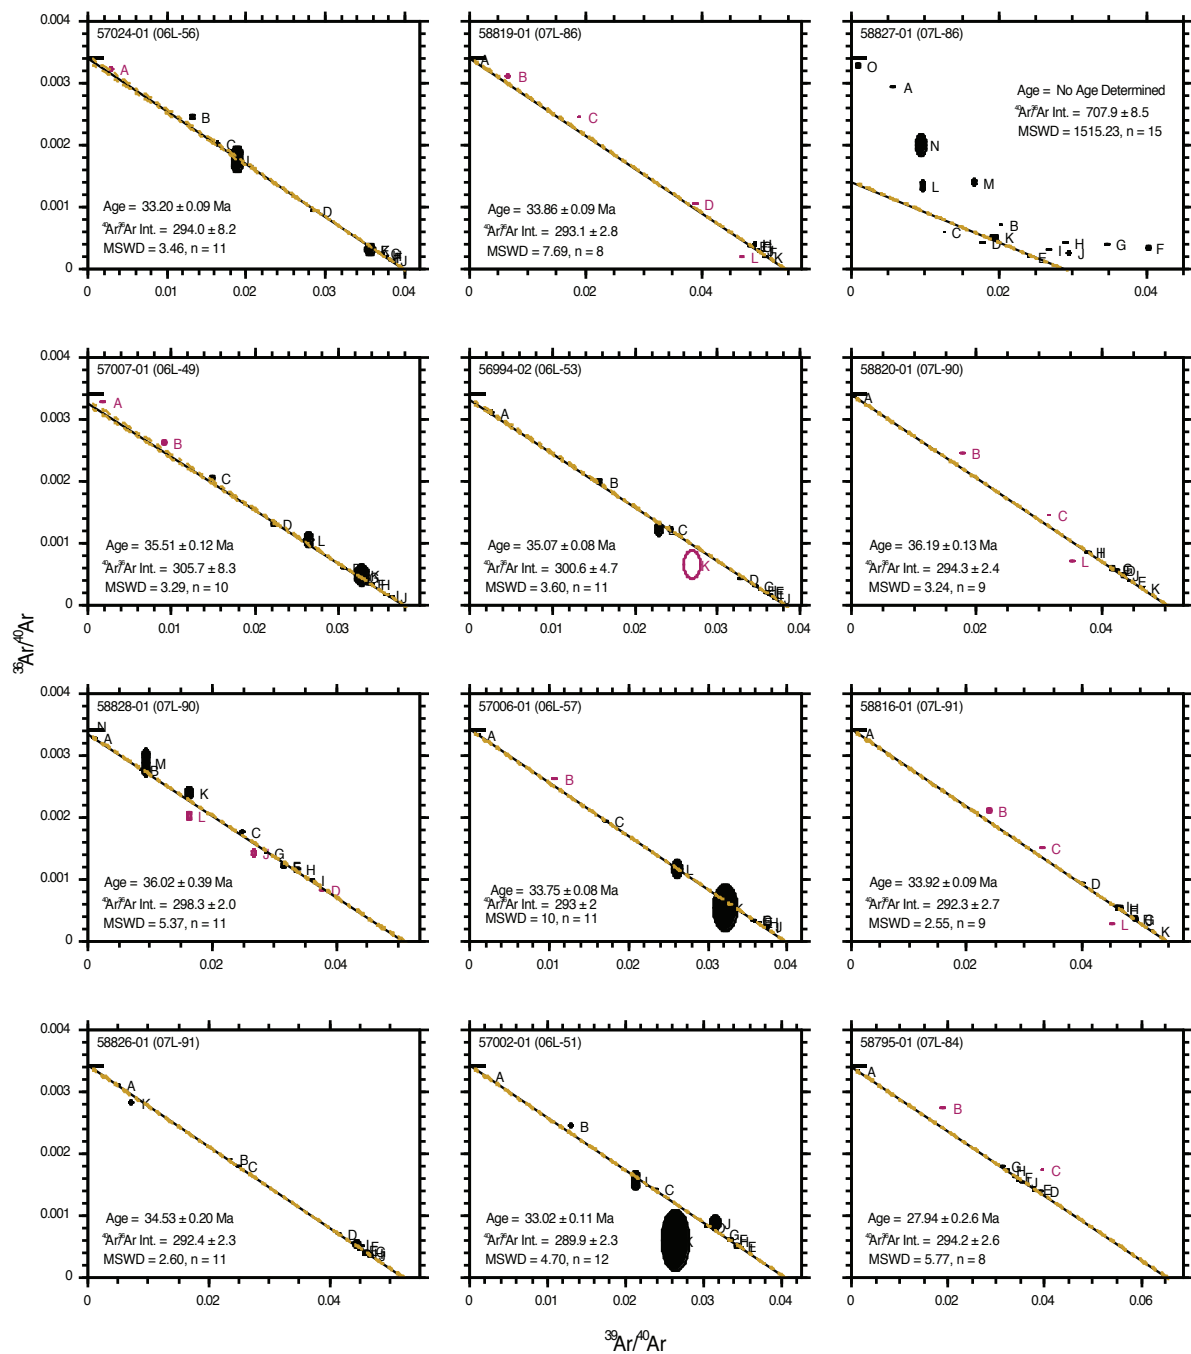

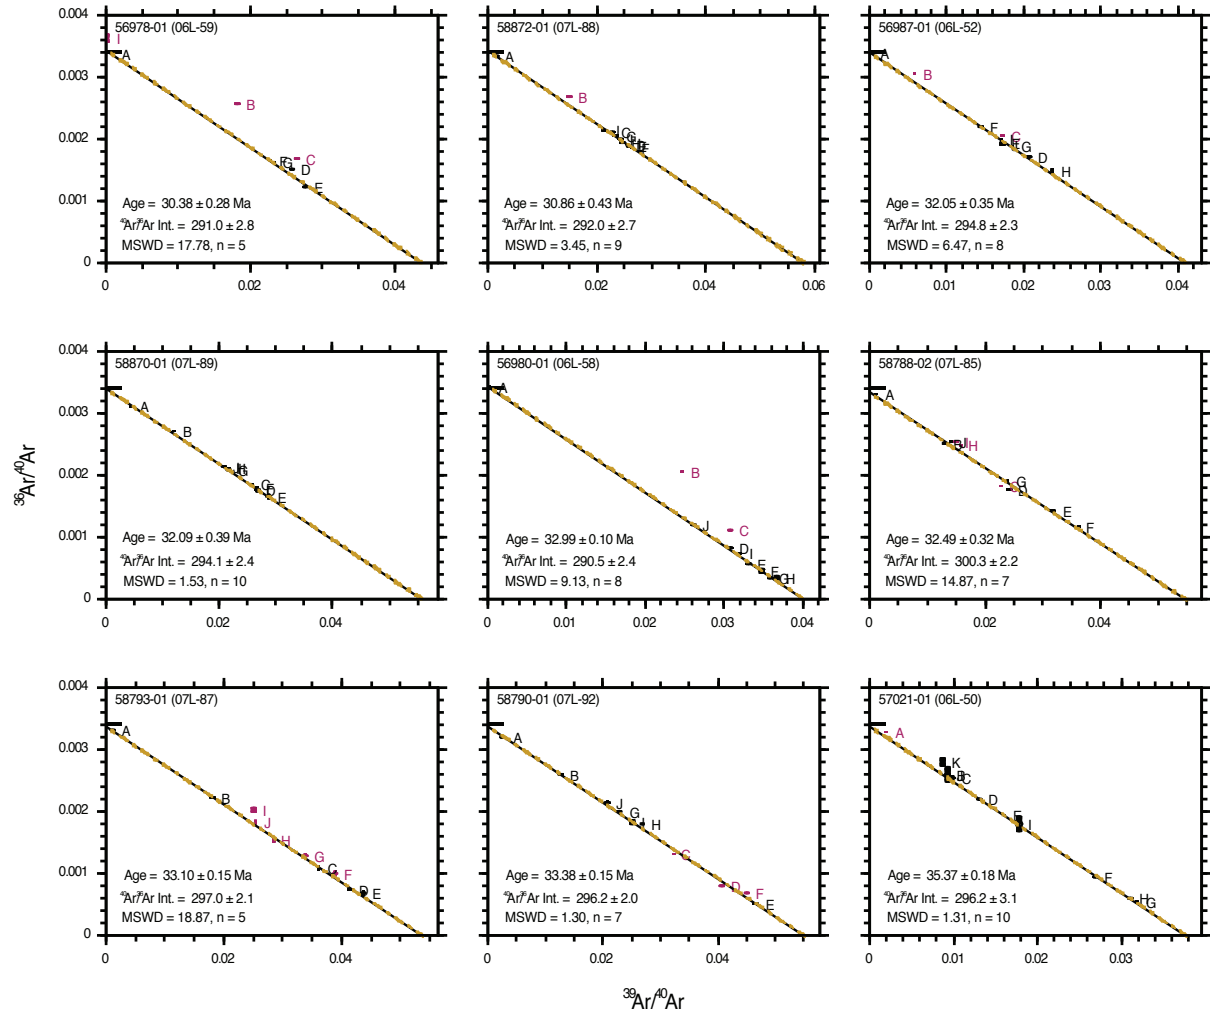

**<sup>40</sup>Ar/<sup>39</sup>Ar analytical data for Summer Coon and Del Norte volcanoes**

| ID                                                                              | Temp<br>(°C) | <sup>40</sup> Ar/ <sup>39</sup> Ar | <sup>37</sup> Ar/ <sup>39</sup> Ar | <sup>36</sup> Ar/ <sup>39</sup> Ar<br>(x 10 <sup>-3</sup> ) | <sup>39</sup> Ar <sub>K</sub><br>(x 10 <sup>-15</sup> mol) | K/Ca        | <sup>40</sup> Ar*<br>(%) | <sup>39</sup> Ar<br>(%) | Age<br>(Ma) | ±1σ<br>(Ma) |
|---------------------------------------------------------------------------------|--------------|------------------------------------|------------------------------------|-------------------------------------------------------------|------------------------------------------------------------|-------------|--------------------------|-------------------------|-------------|-------------|
| <b>06L-56</b> , Biotite, 11.4 mg, J=0.0007311±0.04%, NM-205P, Lab#=57024-01     |              |                                    |                                    |                                                             |                                                            |             |                          |                         |             |             |
| Xi A                                                                            | 650.0        | 327.7                              | 0.0950                             | 1057.3                                                      | 0.470                                                      | 5.4         | 4.7                      | 0.4                     | 20.31       | 2.95        |
| X B                                                                             | 750.0        | 75.49                              | 0.0930                             | 183.6                                                       | 0.372                                                      | 5.5         | 28.2                     | 0.6                     | 28.24       | 2.04        |
| X C                                                                             | 850.0        | 60.97                              | 0.0559                             | 122.7                                                       | 1.03                                                       | 9.1         | 40.6                     | 1.4                     | 32.79       | 0.85        |
| X D                                                                             | 920.0        | 34.79                              | 0.0319                             | 32.46                                                       | 2.49                                                       | 16.0        | 72.4                     | 3.3                     | 33.42       | 0.34        |
| E                                                                               | 1000.0       | 27.82                              | 0.0203                             | 8.629                                                       | 10.0                                                       | 25.1        | 90.8                     | 11.1                    | 33.51       | 0.10        |
| F                                                                               | 1075.0       | 26.60                              | 0.0183                             | 5.045                                                       | 20.2                                                       | 27.9        | 94.4                     | 26.6                    | 33.30       | 0.07        |
| G                                                                               | 1110.0       | 26.86                              | 0.0596                             | 6.846                                                       | 12.1                                                       | 8.6         | 92.5                     | 35.9                    | 32.94       | 0.09        |
| H                                                                               | 1180.0       | 26.74                              | 0.0828                             | 5.959                                                       | 35.1                                                       | 6.2         | 93.4                     | 62.9                    | 33.14       | 0.05        |
| I                                                                               | 1210.0       | 26.47                              | 0.0381                             | 4.977                                                       | 32.2                                                       | 13.4        | 94.5                     | 87.7                    | 33.15       | 0.06        |
| J                                                                               | 1250.0       | 25.92                              | 0.0082                             | 3.444                                                       | 15.2                                                       | 62.0        | 96.1                     | 99.4                    | 33.03       | 0.08        |
| K                                                                               | 1300.0       | 27.88                              | 0.0270                             | 8.717                                                       | 0.674                                                      | 18.9        | 90.8                     | 99.9                    | 33.56       | 1.07        |
| X L                                                                             | 1650.0       | 52.60                              | 0.1395                             | 92.07                                                       | 0.140                                                      | 3.7         | 48.3                     | 100.0                   | 33.69       | 5.10        |
| <b>Integrated age ± 2σ</b>                                                      |              |                                    | n=12                               |                                                             | 130.1                                                      | 11.4        | K2O=5.99%                |                         | 33.13       | 0.12        |
| <b>Plateau ± 2σ</b>                                                             |              | steps E-K                          | n=7                                | MSWD=4.19                                                   | 125.6                                                      | 20.1        | ±37.9                    | 96.5                    | 33.17       | 0.12        |
| <b>Isochron±2σ</b>                                                              |              | steps B-L                          | n=11                               | MSWD=3.46                                                   | <sup>40</sup> Ar/ <sup>36</sup> Ar=                        |             | 294.0±8.2                |                         | 33.20       | 0.09        |
| <b>07L-86</b> , Biotite, 7.11 mg, J=0.0010172±0.07%, NM-222I, Lab#=58819-01     |              |                                    |                                    |                                                             |                                                            |             |                          |                         |             |             |
| X A                                                                             | 650.0        | 2549.0                             | 0.1933                             | 8614.5                                                      | 0.404                                                      | 2.6         | 0.1                      | 0.3                     | 6.36        | 22.54       |
| Xi B                                                                            | 750.0        | 146.1                              | 0.0865                             | 453.8                                                       | 1.22                                                       | 5.9         | 8.2                      | 1.1                     | 22.18       | 1.80        |
| Xi C                                                                            | 850.0        | 52.84                              | 0.0466                             | 128.4                                                       | 3.88                                                       | 11.0        | 28.2                     | 3.8                     | 27.54       | 0.52        |
| Xi D                                                                            | 920.0        | 25.58                              | 0.0222                             | 26.81                                                       | 8.76                                                       | 22.9        | 69.0                     | 9.7                     | 32.59       | 0.18        |
| X E                                                                             | 1000.0       | 20.61                              | 0.0111                             | 7.474                                                       | 16.0                                                       | 46.1        | 89.3                     | 20.7                    | 33.95       | 0.09        |
| X F                                                                             | 1075.0       | 19.91                              | 0.0145                             | 5.623                                                       | 15.3                                                       | 35.2        | 91.7                     | 31.1                    | 33.66       | 0.09        |
| X G                                                                             | 1110.0       | 20.39                              | 0.0183                             | 7.046                                                       | 11.2                                                       | 27.9        | 89.8                     | 38.8                    | 33.77       | 0.10        |
| X H                                                                             | 1180.0       | 20.31                              | 0.1199                             | 7.581                                                       | 14.7                                                       | 4.3         | 89.0                     | 48.8                    | 33.36       | 0.10        |
| X I                                                                             | 1210.0       | 20.34                              | 0.5867                             | 7.310                                                       | 8.50                                                       | 0.87        | 89.6                     | 54.6                    | 33.64       | 0.11        |
| X J                                                                             | 1250.0       | 20.06                              | 0.3722                             | 6.234                                                       | 11.6                                                       | 1.4         | 91.0                     | 62.6                    | 33.68       | 0.10        |
| X K                                                                             | 1300.0       | 19.55                              | 0.0816                             | 3.679                                                       | 41.5                                                       | 6.3         | 94.5                     | 90.9                    | 34.08       | 0.06        |
| Xi L                                                                            | 1680.0       | 21.28                              | 0.0371                             | 4.190                                                       | 13.3                                                       | 13.7        | 94.2                     | 100.0                   | 36.94       | 0.10        |
| <b>Integrated age ± 2σ</b>                                                      |              |                                    | n=12                               |                                                             | 146.4                                                      | 4.6         | K2O=7.77%                |                         | 33.71       | 0.25        |
| <b>Plateau ± 2σ</b>                                                             |              | no plateau                         | n=0                                | MSWD=0.00                                                   | 0.000                                                      | 0.000±0.000 |                          | 0.0                     | 0.00        | 0.00        |
| <b>Isochron±2σ</b>                                                              |              | steps A-K                          | n=8                                | MSWD=7.69                                                   | <sup>40</sup> Ar/ <sup>36</sup> Ar=                        |             | 293.1±2.8                |                         | 33.86       | 0.09        |
| <b>07L-86</b> , Hornblende, 15.21 mg, J=0.0010001±0.13%, NM-222I, Lab#=58827-01 |              |                                    |                                    |                                                             |                                                            |             |                          |                         |             |             |
| X A                                                                             | 1000.0       | 171.8                              | 0.4315                             | 504.1                                                       | 3.96                                                       | 1.2         | 13.3                     | 8.5                     | 41.52       | 1.47        |
| X B                                                                             | 1100.0       | 49.21                              | 1.509                              | 34.40                                                       | 3.11                                                       | 0.34        | 79.6                     | 15.1                    | 70.40       | 0.39        |
| X C                                                                             | 1150.0       | 79.08                              | 4.484                              | 48.24                                                       | 10.4                                                       | 0.11        | 82.4                     | 37.3                    | 115.96      | 0.31        |
| X D                                                                             | 1175.0       | 55.51                              | 4.511                              | 24.15                                                       | 11.5                                                       | 0.11        | 87.8                     | 61.9                    | 87.41       | 0.20        |
| X E                                                                             | 1190.0       | 41.36                              | 4.503                              | 9.446                                                       | 7.01                                                       | 0.11        | 94.2                     | 76.9                    | 70.15       | 0.21        |
| X F                                                                             | 1200.0       | 24.74                              | 4.716                              | 9.600                                                       | 1.62                                                       | 0.11        | 90.1                     | 80.4                    | 40.49       | 0.41        |
| X G                                                                             | 1210.0       | 28.62                              | 4.752                              | 12.29                                                       | 1.19                                                       | 0.11        | 88.7                     | 82.9                    | 46.04       | 0.51        |
| X H                                                                             | 1220.0       | 34.29                              | 4.674                              | 15.66                                                       | 1.17                                                       | 0.11        | 87.6                     | 85.4                    | 54.36       | 0.50        |
| X I                                                                             | 1235.0       | 37.04                              | 5.003                              | 12.58                                                       | 2.18                                                       | 0.10        | 91.1                     | 90.1                    | 60.94       | 0.38        |
| X J                                                                             | 1250.0       | 33.67                              | 5.130                              | 9.184                                                       | 3.70                                                       | 0.099       | 93.2                     | 98.0                    | 56.76       | 0.24        |
| X K                                                                             | 1265.0       | 50.90                              | 5.748                              | 27.12                                                       | 0.382                                                      | 0.089       | 85.2                     | 98.8                    | 78.00       | 1.54        |
| X L                                                                             | 1280.0       | 102.6                              | 6.733                              | 138.0                                                       | 0.100                                                      | 0.076       | 60.8                     | 99.0                    | 111.31      | 5.80        |
| X M                                                                             | 1350.0       | 59.55                              | 5.471                              | 84.33                                                       | 0.356                                                      | 0.093       | 58.9                     | 99.8                    | 63.35       | 1.86        |
| X N                                                                             | 1450.0       | 102.9                              | 7.691                              | 207.4                                                       | 0.055                                                      | 0.066       | 41.1                     | 99.9                    | 76.21       | 10.90       |
| X O                                                                             | 1750.0       | 999.2                              | 10.81                              | 3270.6                                                      | 0.033                                                      | 0.047       | 3.4                      | 100.0                   | 60.96       | 25.46       |
| <b>Integrated age ± 2σ</b>                                                      |              |                                    | n=15                               |                                                             | 46.8                                                       | 0.13        | K2O=1.18%                |                         | 78.95       | 0.54        |
| <b>Plateau ± 2σ</b>                                                             |              | no plateau                         | n=0                                | MSWD=0.00                                                   | 0.000                                                      | 0.000±0.000 |                          | 0.0                     | 0.00        | 0.00        |
| <b>Isochron±2σ</b>                                                              |              | steps A-O                          | n=15                               | ISWD=1515.23                                                | <sup>40</sup> Ar/ <sup>36</sup> Ar=                        |             | 707.9±8.5                |                         | 62.69       | 0.37        |
| <b>06L-49</b> , Biotite, 11.1 mg, J=0.0007416±0.07%, NM-205M, Lab#=57007-01     |              |                                    |                                    |                                                             |                                                            |             |                          |                         |             |             |
| Xi A                                                                            | 650.0        | 511.0                              | 0.1413                             | 1668.6                                                      | 0.577                                                      | 3.6         | 3.5                      | 0.6                     | 24.22       | 3.47        |
| Xi B                                                                            | 750.0        | 108.2                              | 0.1320                             | 282.6                                                       | 0.544                                                      | 3.9         | 22.8                     | 1.1                     | 33.18       | 1.58        |
| X C                                                                             | 850.0        | 66.80                              | 0.1264                             | 136.5                                                       | 0.778                                                      | 4.0         | 39.6                     | 1.8                     | 35.58       | 1.10        |

|                              |        |           |        |           |                                               |      |            |       |       |      |
|------------------------------|--------|-----------|--------|-----------|-----------------------------------------------|------|------------|-------|-------|------|
| X D                          | 920.0  | 44.68     | 0.0730 | 58.42     | 1.35                                          | 7.0  | 61.4       | 3.1   | 36.86 | 0.58 |
| X E                          | 1000.0 | 32.59     | 0.0572 | 19.25     | 4.54                                          | 8.9  | 82.6       | 7.4   | 36.16 | 0.20 |
| X F                          | 1075.0 | 29.71     | 0.0576 | 10.18     | 10.9                                          | 8.9  | 89.9       | 17.8  | 35.91 | 0.10 |
| G                            | 1110.0 | 30.64     | 0.1089 | 13.89     | 8.42                                          | 4.7  | 86.6       | 25.8  | 35.68 | 0.11 |
| H                            | 1180.0 | 29.25     | 0.1249 | 10.04     | 16.6                                          | 4.1  | 89.9       | 41.7  | 35.35 | 0.08 |
| I                            | 1210.0 | 27.82     | 0.0415 | 4.585     | 49.2                                          | 12.3 | 95.1       | 88.6  | 35.58 | 0.06 |
| J                            | 1250.0 | 27.42     | 0.0196 | 3.403     | 11.2                                          | 26.0 | 96.3       | 99.3  | 35.52 | 0.09 |
| K                            | 1300.0 | 30.36     | 0.4777 | 14.09     | 0.304                                         | 1.1  | 86.4       | 99.6  | 35.28 | 2.38 |
| L                            | 1650.0 | 37.64     | 0.3787 | 39.60     | 0.388                                         | 1.3  | 69.0       | 100.0 | 34.93 | 1.87 |
| Integrated age $\pm 2\sigma$ |        |           | n=12   |           | 104.9                                         | 7.9  | K2O=4.89%  |       | 35.56 | 0.16 |
| Plateau $\pm 2\sigma$        |        | steps G-L | n=6    | MSWD=1.57 | 86.2                                          | 11.7 | $\pm 19.2$ | 82.2  | 35.53 | 0.11 |
| Isochron $\pm 2\sigma$       |        | steps C-L | n=10   | MSWD=3.29 | $^{40}\text{Ar}/^{36}\text{Ar}= 305.7\pm 8.3$ |      |            |       | 35.51 | 0.12 |

**06L-53**, Biotite, 10.3 mg, J=0.0007394 $\pm$ 0.06%, NM-205L, Lab#=56994-02

|                     |        |       |           |        |           |                                     |           |           |       |       |      |
|---------------------|--------|-------|-----------|--------|-----------|-------------------------------------|-----------|-----------|-------|-------|------|
| X A                 | 650.0  | 369.5 | 0.1194    | 1149.2 | 0.325     | 4.3                                 | 8.1       | 0.3       | 40.06 | 3.92  |      |
| X B                 | 750.0  | 63.10 | 0.0837    | 126.0  | 0.802     | 6.1                                 | 41.0      | 1.0       | 34.69 | 1.01  |      |
| X C                 | 850.0  | 41.14 | 0.0636    | 50.26  | 1.29      | 8.0                                 | 63.9      | 2.1       | 35.25 | 0.61  |      |
| X D                 | 920.0  | 30.40 | 0.0280    | 12.26  | 5.16      | 18.2                                | 88.1      | 6.7       | 35.90 | 0.17  |      |
| E                   | 1000.0 | 27.73 | 0.0140    | 5.076  | 15.8      | 36.5                                | 94.6      | 20.6      | 35.16 | 0.07  |      |
| F                   | 1075.0 | 27.81 | 0.0232    | 5.928  | 18.7      | 22.0                                | 93.7      | 37.1      | 34.94 | 0.08  |      |
| G                   | 1110.0 | 28.81 | 0.0880    | 8.747  | 6.87      | 5.8                                 | 91.1      | 43.2      | 35.17 | 0.13  |      |
| H                   | 1180.0 | 28.45 | 0.1256    | 7.303  | 11.0      | 4.1                                 | 92.5      | 53.0      | 35.26 | 0.09  |      |
| I                   | 1210.0 | 27.46 | 0.0889    | 4.581  | 20.0      | 5.7                                 | 95.1      | 70.7      | 35.01 | 0.07  |      |
| J                   | 1250.0 | 26.95 | 0.0296    | 2.856  | 32.6      | 17.2                                | 96.9      | 99.5      | 35.00 | 0.06  |      |
| i K                 | 1300.0 | 36.95 | 0.2234    | 23.39  | 0.183     | 2.3                                 | 81.3      | 99.7      | 40.25 | 3.92  |      |
| L                   | 1650.0 | 43.47 | 0.2531    | 53.42  | 0.389     | 2.0                                 | 63.7      | 100.0     | 37.12 | 1.88  |      |
| Integrated age ± 2σ |        |       | n=12      |        | 113.1     | 9.8                                 | K2O=5.70% |           | 35.14 | 0.12  |      |
| Plateau ± 2σ        |        |       | steps E-L | n=8    | MSWD=1.99 | 105.5                               | 16.6      | ±24.7     | 93.3  | 35.06 | 0.10 |
| Isochron±2σ         |        |       | steps A-L | n=11   | MSWD=3.60 | <sup>40</sup> Ar/ <sup>36</sup> Ar= |           | 300.6±4.7 | 35.07 | 0.08  |      |

**07L-90**, Biotite, 8.22 mg, J=0.001007 $\pm$ 0.13%, NM-222I, Lab#=58820-01

|                              |        |        |           |        |           |                                               |           |            |       |       |      |
|------------------------------|--------|--------|-----------|--------|-----------|-----------------------------------------------|-----------|------------|-------|-------|------|
| X A                          | 650.0  | 1672.8 | 0.0470    | 5607.5 | 1.58      | 10.9                                          | 0.9       | 0.9        | 28.94 | 12.74 |      |
| Xi B                         | 750.0  | 55.65  | 0.0845    | 135.4  | 4.38      | 6.0                                           | 28.1      | 3.4        | 28.62 | 0.53  |      |
| Xi C                         | 850.0  | 31.68  | 0.0351    | 45.98  | 12.9      | 14.5                                          | 57.1      | 10.7       | 33.06 | 0.21  |      |
| X D                          | 920.0  | 23.54  | 0.0172    | 13.14  | 22.6      | 29.7                                          | 83.5      | 23.5       | 35.88 | 0.10  |      |
| X E                          | 1000.0 | 22.57  | 0.0147    | 8.877  | 31.6      | 34.7                                          | 88.4      | 41.4       | 36.41 | 0.08  |      |
| F                            | 1075.0 | 23.78  | 0.0218    | 13.31  | 21.7      | 23.4                                          | 83.5      | 53.7       | 36.22 | 0.11  |      |
| G                            | 1110.0 | 23.90  | 0.0236    | 13.72  | 14.5      | 21.6                                          | 83.0      | 61.9       | 36.23 | 0.12  |      |
| H                            | 1180.0 | 26.45  | 0.0629    | 22.57  | 13.4      | 8.1                                           | 74.8      | 69.5       | 36.11 | 0.14  |      |
| I                            | 1210.0 | 26.21  | 0.0919    | 22.36  | 10.3      | 5.6                                           | 74.8      | 75.3       | 35.81 | 0.15  |      |
| J                            | 1250.0 | 22.92  | 0.1118    | 10.59  | 14.5      | 4.6                                           | 86.4      | 83.5       | 36.14 | 0.10  |      |
| K                            | 1300.0 | 21.53  | 0.1670    | 6.075  | 23.8      | 3.1                                           | 91.7      | 97.0       | 36.04 | 0.09  |      |
| Xi L                         | 1680.0 | 28.25  | 0.3034    | 19.82  | 5.31      | 1.7                                           | 79.4      | 100.0      | 40.88 | 0.23  |      |
| Integrated age $\pm 2\sigma$ |        |        | n=12      |        | 176.4     | 7.8                                           | K2O=8.19% |            | 35.82 | 0.39  |      |
| Plateau $\pm 2\sigma$        |        |        | steps F-K | n=6    | MSWD=1.35 | 98.1                                          | 11.5      | $\pm 18.1$ | 55.6  | 36.11 | 0.14 |
| Isochron $\pm 2\sigma$       |        |        | steps A-K | n=9    | MSWD=3.24 | $^{40}\text{Ar}/^{36}\text{Ar}= 294.3\pm 2.4$ |           |            | 36.19 | 0.13  |      |

**07L-90**, Homblende, 14.19 mg, J=0.0010103 $\pm$ 0.07%, NM-222I, Lab#=58828-01

|                              |        |         |            |         |           |                                               |                 |       |         |         |
|------------------------------|--------|---------|------------|---------|-----------|-----------------------------------------------|-----------------|-------|---------|---------|
| X A                          | 1000.0 | 809.1   | 0.1840     | 2649.6  | 6.10      | 2.8                                           | 3.2             | 13.5  | 47.75   | 5.95    |
| X B                          | 1100.0 | 116.1   | 1.304      | 319.4   | 4.24      | 0.39                                          | 18.8            | 22.9  | 39.92   | 0.89    |
| X C                          | 1150.0 | 39.83   | 4.349      | 70.78   | 12.0      | 0.12                                          | 48.4            | 49.5  | 35.40   | 0.26    |
| Xi D                         | 1190.0 | 26.41   | 4.765      | 22.82   | 11.5      | 0.11                                          | 76.0            | 74.9  | 36.85   | 0.17    |
| X E                          | 1200.0 | 31.51   | 4.466      | 38.51   | 3.11      | 0.11                                          | 65.1            | 81.8  | 37.64   | 0.36    |
| X F                          | 1210.0 | 31.45   | 4.636      | 39.71   | 1.74      | 0.11                                          | 63.9            | 85.6  | 36.92   | 0.57    |
| X G                          | 1220.0 | 34.87   | 4.945      | 50.36   | 1.30      | 0.10                                          | 58.5            | 88.5  | 37.46   | 0.72    |
| X H                          | 1235.0 | 29.36   | 5.533      | 35.40   | 1.92      | 0.092                                         | 65.9            | 92.7  | 35.59   | 0.50    |
| X I                          | 1250.0 | 27.56   | 5.434      | 28.79   | 2.23      | 0.094                                         | 70.8            | 97.7  | 35.85   | 0.38    |
| Xi J                         | 1265.0 | 37.31   | 4.707      | 54.14   | 0.542     | 0.11                                          | 58.2            | 98.9  | 39.83   | 1.36    |
| X K                          | 1280.0 | 60.32   | 4.805      | 144.8   | 0.183     | 0.11                                          | 29.7            | 99.3  | 32.98   | 3.90    |
| Xi L                         | 1350.0 | 60.46   | 11.07      | 124.8   | 0.271     | 0.046                                         | 40.5            | 99.9  | 45.09   | 2.83    |
| X M                          | 1450.0 | 105.2   | 7.482      | 304.7   | 0.053     | 0.068                                         | 15.0            | 100.0 | 29.02   | 13.17   |
| X N                          | 1750.0 | 15003.9 | 83.55      | 52049.6 | 0.002     | 0.006                                         | -2.5            | 100.0 | -923.83 | 1533.93 |
| Integrated age $\pm 2\sigma$ |        |         | n=14       |         | 45.2      | 0.13                                          | K2O=1.21%       |       | 38.25   | 1.97    |
| Plateau $\pm 2\sigma$        |        |         | no plateau | n=0     | MSWD=0.00 | 0.0                                           | 0.00 $\pm 0.00$ |       | 0.00    | 0.00    |
| Isochron $\pm 2\sigma$       |        |         | steps A-N  | n=11    | MSWD=5.37 | $^{40}\text{Ar}/^{36}\text{Ar}= 298.3\pm 2.0$ |                 |       | 36.02   | 0.39    |

**06L-57**, Biotite, 11.2 mg, J=0.0007401±0.07%, NM-205M, Lab#=#57006-01

|                     |        |       |           |        |            |                                               |           |       |       |       |      |
|---------------------|--------|-------|-----------|--------|------------|-----------------------------------------------|-----------|-------|-------|-------|------|
| X A                 | 650.0  | 851.8 | 0.0768    | 2844.1 | 1.26       | 6.6                                           | 1.3       | 1.0   | 15.32 | 4.98  |      |
| Xi B                | 750.0  | 92.06 | 0.0447    | 240.1  | 1.31       | 11.4                                          | 22.9      | 2.0   | 28.39 | 0.88  |      |
| X C                 | 850.0  | 57.85 | 0.0210    | 112.0  | 3.99       | 24.3                                          | 42.8      | 5.2   | 33.23 | 0.36  |      |
| X D                 | 920.0  | 31.83 | 0.0140    | 20.91  | 8.36       | 36.4                                          | 80.6      | 11.8  | 34.43 | 0.13  |      |
| X E                 | 1000.0 | 27.81 | 0.0113    | 8.380  | 19.5       | 45.3                                          | 91.1      | 27.1  | 34.00 | 0.08  |      |
| F                   | 1075.0 | 27.98 | 0.0149    | 9.469  | 22.1       | 34.3                                          | 90.0      | 44.5  | 33.80 | 0.07  |      |
| G                   | 1110.0 | 27.85 | 0.0292    | 9.070  | 16.7       | 17.5                                          | 90.4      | 57.6  | 33.79 | 0.08  |      |
| H                   | 1180.0 | 27.32 | 0.0382    | 8.322  | 20.0       | 13.4                                          | 91.0      | 73.4  | 33.38 | 0.07  |      |
| I                   | 1210.0 | 26.66 | 0.0174    | 5.907  | 30.9       | 29.3                                          | 93.5      | 97.7  | 33.45 | 0.06  |      |
| J                   | 1250.0 | 26.72 | 0.0096    | 6.113  | 2.47       | 52.9                                          | 93.2      | 99.7  | 33.44 | 0.31  |      |
| K                   | 1300.0 | 31.04 | 0.0370    | 16.42  | 0.143      | 13.8                                          | 84.4      | 99.8  | 35.15 | 5.08  |      |
| L                   | 1650.0 | 38.19 | 0.1306    | 44.18  | 0.296      | 3.9                                           | 65.8      | 100.0 | 33.75 | 2.46  |      |
| Integrated age ± 2σ |        |       | n=12      |        | 126.9      | 23.5                                          | K2O=5.88% |       | 33.48 | 0.22  |      |
| Plateau ± 2σ        |        |       | steps F-L | n=7    | MSWD=4.91  | 92.5                                          | 25.4      | ±33.0 | 72.9  | 33.58 | 0.16 |
| Isochron±2σ         |        |       | steps A-L | n=11   | MSWD=10.29 | <sup>40</sup> Ar/ <sup>36</sup> Ar= 292.5±2.3 |           |       | 33.75 | 0.08  |      |

**07L-91**, Biotite, 8.08 mg, J=0.0010251±0.08%, NM-222I, Lab#=#58816-01

|                     |        |        |           |        |           |                                               |           |       |       |       |      |
|---------------------|--------|--------|-----------|--------|-----------|-----------------------------------------------|-----------|-------|-------|-------|------|
| X A                 | 650.0  | 1043.3 | 0.1789    | 3492.0 | 0.718     | 2.9                                           | 1.1       | 0.4   | 21.40 | 9.17  |      |
| Xi B                | 750.0  | 41.64  | 0.1202    | 87.72  | 1.62      | 4.2                                           | 37.8      | 1.4   | 29.28 | 0.68  |      |
| Xi C                | 850.0  | 30.16  | 0.1373    | 45.09  | 2.49      | 3.7                                           | 55.9      | 2.8   | 31.35 | 0.40  |      |
| X D                 | 920.0  | 24.83  | 0.0682    | 23.04  | 3.80      | 7.5                                           | 72.6      | 5.0   | 33.52 | 0.27  |      |
| E                   | 1000.0 | 21.44  | 0.0349    | 10.68  | 10.5      | 14.6                                          | 85.3      | 11.1  | 34.00 | 0.12  |      |
| F                   | 1075.0 | 20.31  | 0.0284    | 7.206  | 17.5      | 18.0                                          | 89.5      | 21.1  | 33.80 | 0.10  |      |
| G                   | 1110.0 | 20.27  | 0.0205    | 6.969  | 16.9      | 24.9                                          | 89.8      | 30.9  | 33.85 | 0.08  |      |
| H                   | 1180.0 | 21.35  | 0.0359    | 11.08  | 26.3      | 14.2                                          | 84.7      | 46.0  | 33.61 | 0.10  |      |
| I                   | 1210.0 | 21.68  | 0.0699    | 12.19  | 13.3      | 7.3                                           | 83.4      | 53.7  | 33.62 | 0.11  |      |
| J                   | 1250.0 | 20.17  | 0.0982    | 6.747  | 17.5      | 5.2                                           | 90.2      | 63.8  | 33.81 | 0.09  |      |
| X K                 | 1300.0 | 19.19  | 0.0559    | 3.011  | 52.6      | 9.1                                           | 95.4      | 94.1  | 34.03 | 0.06  |      |
| Xi L                | 1680.0 | 22.08  | 0.0797    | 6.215  | 10.1      | 6.4                                           | 91.7      | 100.0 | 37.60 | 0.12  |      |
| Integrated age ± 2σ |        |        | n=12      |        | 173.4     | 9.3                                           | K2O=8.04% |       | 33.95 | 0.19  |      |
| Plateau ± 2σ        |        |        | steps E-J | n=6    | MSWD=1.81 | 102.0                                         | 14.2      | ±14.4 | 58.8  | 33.79 | 0.12 |
| Isochron±2σ         |        |        | steps A-K | n=9    | MSWD=2.55 | <sup>40</sup> Ar/ <sup>36</sup> Ar= 292.3±2.7 |           |       | 33.92 | 0.09  |      |

**07L-91**, Hornblende, 15.7 mg, J=0.0009954±0.17%, NM-222I, Lab#=#58826-01

|                     |        |       |        |       |           |       |           |                                               |            |       |       |      |
|---------------------|--------|-------|--------|-------|-----------|-------|-----------|-----------------------------------------------|------------|-------|-------|------|
| X A                 | 1000.0 | 196.6 | 0.2947 | 607.4 | 5.80      | 1.7   | 8.7       | 11.9                                          | 30.92      | 1.51  |       |      |
| X B                 | 1100.0 | 42.31 | 0.8343 | 80.97 | 4.37      | 0.61  | 43.6      | 20.9                                          | 33.34      | 0.43  |       |      |
| C                   | 1150.0 | 39.55 | 3.001  | 71.57 | 6.26      | 0.17  | 47.2      | 33.8                                          | 33.74      | 0.31  |       |      |
| D                   | 1190.0 | 24.00 | 4.598  | 18.12 | 11.8      | 0.11  | 79.3      | 58.1                                          | 34.45      | 0.13  |       |      |
| E                   | 1200.0 | 22.08 | 4.434  | 11.25 | 5.82      | 0.12  | 86.6      | 70.1                                          | 34.63      | 0.18  |       |      |
| F                   | 1205.0 | 21.95 | 4.107  | 12.10 | 2.68      | 0.12  | 85.3      | 75.6                                          | 33.88      | 0.28  |       |      |
| G                   | 1210.0 | 21.59 | 3.782  | 9.814 | 1.84      | 0.13  | 88.0      | 79.4                                          | 34.39      | 0.36  |       |      |
| H                   | 1215.0 | 21.74 | 3.163  | 9.249 | 1.14      | 0.16  | 88.6      | 81.7                                          | 34.86      | 0.53  |       |      |
| I                   | 1220.0 | 22.37 | 2.879  | 12.86 | 0.821     | 0.18  | 84.1      | 83.4                                          | 34.02      | 0.66  |       |      |
| J                   | 1280.0 | 21.26 | 4.900  | 8.712 | 7.60      | 0.10  | 89.8      | 99.1                                          | 34.57      | 0.14  |       |      |
| X K                 | 1700.0 | 131.0 | 44.89  | 380.6 | 0.452     | 0.011 | 17.0      | 100.0                                         | 41.35      | 2.59  |       |      |
| Integrated age ± 2σ |        |       |        |       | n=11      | 48.6  | 0.13      | K2O=1.19%                                     | 33.93      | 0.56  |       |      |
| Plateau ± 2σ        |        |       |        |       | steps C-J | n=8   | MSWD=1.70 | 38.0                                          | 0.12 ±0.06 | 78.1  | 34.43 | 0.23 |
| Isochron±2σ         |        |       |        |       | steps A-K | n=11  | MSWD=2.60 | <sup>40</sup> Ar/ <sup>36</sup> Ar= 292.4±2.3 |            | 34.53 | 0.20  |      |

**06L-51**, Biotite, 11.6 mg, J=0.0007382±0.08%, NM-205M, Lab#=#57002-01

|                     |        |           |        |           |       |      |           |       |       |      |
|---------------------|--------|-----------|--------|-----------|-------|------|-----------|-------|-------|------|
| X A                 | 650.0  | 453.2     | 0.3117 | 1466.3    | 1.62  | 1.6  | 4.4       | 1.6   | 26.68 | 2.53 |
| X B                 | 750.0  | 76.29     | 0.3543 | 187.0     | 1.48  | 1.4  | 27.6      | 3.1   | 28.26 | 0.71 |
| X C                 | 850.0  | 41.63     | 0.1739 | 58.67     | 4.80  | 2.9  | 58.4      | 7.9   | 32.56 | 0.23 |
| XI D                | 920.0  | 32.66     | 0.0889 | 26.58     | 4.59  | 5.7  | 76.0      | 12.6  | 33.23 | 0.21 |
| X E                 | 1000.0 | 28.96     | 0.0491 | 14.11     | 9.74  | 10.4 | 85.6      | 22.3  | 33.21 | 0.11 |
| F                   | 1075.0 | 29.75     | 0.0642 | 18.26     | 19.4  | 7.9  | 81.9      | 41.8  | 32.63 | 0.09 |
| G                   | 1110.0 | 31.00     | 0.1303 | 21.98     | 10.0  | 3.9  | 79.1      | 51.8  | 32.83 | 0.12 |
| H                   | 1180.0 | 29.76     | 0.1307 | 17.70     | 32.2  | 3.9  | 82.5      | 84.2  | 32.87 | 0.07 |
| I                   | 1210.0 | 28.62     | 0.0396 | 13.71     | 15.0  | 12.9 | 85.9      | 99.2  | 32.90 | 0.09 |
| J                   | 1250.0 | 31.46     | 0.2761 | 27.74     | 0.486 | 1.8  | 74.0      | 99.7  | 31.20 | 1.51 |
| K                   | 1300.0 | 37.57     | 0.6289 | 22.40     | 0.090 | 0.81 | 82.5      | 99.8  | 41.43 | 7.96 |
| X L                 | 1650.0 | 46.67     | 0.3682 | 72.82     | 0.229 | 1.4  | 54.0      | 100.0 | 33.73 | 3.19 |
| Integrated age ± 2σ |        |           | n=12   |           | 99.6  | 4.9  | K2O=4.47% |       | 32.71 | 0.23 |
| Plateau ± 2σ        |        | steps F-K | n=6    | MSWD=1.63 | 77.1  | 6.6  | ±9.0      | 77.4  | 32.81 | 0.13 |

|                    |           |      |           |                                     |           |       |      |
|--------------------|-----------|------|-----------|-------------------------------------|-----------|-------|------|
| <b>Isochron±2σ</b> | steps A-L | n=12 | MSWD=4.70 | <sup>40</sup> Ar/ <sup>36</sup> Ar= | 289.9±2.3 | 33.02 | 0.11 |
|--------------------|-----------|------|-----------|-------------------------------------|-----------|-------|------|

**07L-84**, Groundmass Concentrate, 21.24 mg, J=0.0010064±0.06%, NM-222F, Lab#=58795-01

|                            |      |       |        |           |      |           |                                     |            |       |       |
|----------------------------|------|-------|--------|-----------|------|-----------|-------------------------------------|------------|-------|-------|
| X A                        | 3.0  | 723.2 | 0.2769 | 2408.7    | 1.53 | 1.8       | 1.6                                 | 1.7        | 21.06 | 5.83  |
| Xi B                       | 4.0  | 51.99 | 0.3665 | 142.6     | 7.46 | 1.4       | 19.0                                | 10.1       | 18.15 | 0.40  |
| Xi C                       | 4.5  | 25.27 | 0.4430 | 43.92     | 9.18 | 1.2       | 48.8                                | 20.4       | 22.58 | 0.17  |
| X D                        | 6.0  | 25.40 | 0.7263 | 35.75     | 20.0 | 0.70      | 58.6                                | 42.8       | 27.25 | 0.14  |
| E                          | 8.0  | 26.36 | 1.555  | 37.34     | 15.1 | 0.33      | 58.6                                | 59.7       | 28.28 | 0.15  |
| F                          | 10.0 | 29.18 | 0.4924 | 47.14     | 9.97 | 1.0       | 52.4                                | 70.9       | 27.96 | 0.19  |
| G                          | 13.0 | 31.76 | 2.139  | 57.18     | 12.1 | 0.24      | 47.4                                | 84.6       | 27.54 | 0.22  |
| H                          | 16.0 | 30.74 | 4.243  | 54.02     | 8.27 | 0.12      | 49.2                                | 93.8       | 27.74 | 0.24  |
| I                          | 18.0 | 28.99 | 1.961  | 45.89     | 2.98 | 0.26      | 53.8                                | 97.2       | 28.54 | 0.32  |
| J                          | 25.0 | 27.97 | 1.893  | 43.07     | 2.51 | 0.27      | 55.1                                | 100.0      | 28.19 | 0.29  |
| <b>Integrated age ± 2σ</b> |      |       |        | n=10      | 89.1 | 0.37      | K2O=1.60%                           |            | 26.33 | 0.47  |
| <b>Plateau ± 2σ</b>        |      |       |        | steps E-J | n=6  | MSWD=2.49 | 51.0                                | 0.40 ±0.66 | 57.2  | 28.04 |
| <b>Isochron±2σ</b>         |      |       |        | steps A-J | n=8  | MSWD=5.77 | <sup>40</sup> Ar/ <sup>36</sup> Ar= | 294.2±2.6  | 27.94 | 0.26  |

**06L-59**, Groundmass Concentrate, 23.7 mg, J=0.0007326±0.06%, NM-205J, Lab#=56978-01

|                            |        |        |        |           |       |            |                                     |            |         |       |
|----------------------------|--------|--------|--------|-----------|-------|------------|-------------------------------------|------------|---------|-------|
| X A                        | 550.0  | 1079.8 | 2.764  | 3628.5    | 0.275 | 0.18       | 0.7                                 | 1.0        | 10.44   | 6.93  |
| Xi B                       | 625.0  | 54.47  | 0.4508 | 139.8     | 3.71  | 1.1        | 24.2                                | 13.9       | 17.62   | 0.30  |
| Xi C                       | 700.0  | 37.65  | 0.8739 | 62.77     | 4.27  | 0.58       | 50.9                                | 28.8       | 25.55   | 0.20  |
| X D                        | 750.0  | 38.67  | 1.306  | 58.03     | 3.36  | 0.39       | 55.9                                | 40.5       | 28.81   | 0.19  |
| E                          | 800.0  | 35.96  | 1.326  | 44.25     | 3.86  | 0.38       | 63.9                                | 54.0       | 30.61   | 0.14  |
| F                          | 875.0  | 43.83  | 1.224  | 71.97     | 5.90  | 0.42       | 51.7                                | 74.5       | 30.17   | 0.19  |
| G                          | 975.0  | 42.95  | 2.003  | 69.57     | 5.35  | 0.25       | 52.5                                | 93.2       | 30.05   | 0.18  |
| Xi I                       | 1250.0 | 3202.2 | 0.1093 | 11601.5   | 1.96  | 4.7        | -7.1                                | 100.0      | -331.45 | 89.02 |
| <b>Integrated age ± 2σ</b> |        |        |        | n=8       | 28.7  | 0.43       | K2O=0.63%                           |            | 4.99    | 10.18 |
| <b>Plateau ± 2σ</b>        |        |        |        | steps E-G | n=3   | MSWD=3.41  | 15.1                                | 0.35 ±0.17 | 52.7    | 30.34 |
| <b>Isochron±2σ</b>         |        |        |        | steps A-G | n=5   | MSWD=17.78 | <sup>40</sup> Ar/ <sup>36</sup> Ar= | 291.0±2.8  | 30.38   | 0.28  |

**07L-88**, Groundmass Concentrate, 16.4 mg, J=0.0009851±0.06%, NM-222E, Lab#=58872-01

|                            |      |       |        |           |      |           |                                     |            |       |       |
|----------------------------|------|-------|--------|-----------|------|-----------|-------------------------------------|------------|-------|-------|
| X A                        | 3.0  | 579.6 | 0.4550 | 1922.5    | 1.37 | 1.1       | 2.0                                 | 1.9        | 20.73 | 4.55  |
| Xi B                       | 4.0  | 66.12 | 0.6684 | 176.6     | 4.13 | 0.76      | 21.2                                | 7.7        | 25.08 | 0.50  |
| X C                        | 4.5  | 43.33 | 0.7511 | 91.81     | 4.11 | 0.68      | 37.5                                | 13.5       | 29.10 | 0.32  |
| D                          | 6.0  | 39.03 | 0.6754 | 74.22     | 6.53 | 0.76      | 44.0                                | 22.7       | 30.70 | 0.27  |
| E                          | 8.0  | 38.41 | 0.7332 | 72.23     | 20.0 | 0.70      | 44.6                                | 50.9       | 30.65 | 0.21  |
| F                          | 10.0 | 37.60 | 1.133  | 70.14     | 10.7 | 0.45      | 45.1                                | 65.9       | 30.37 | 0.22  |
| G                          | 13.0 | 42.12 | 1.482  | 86.31     | 12.5 | 0.34      | 39.7                                | 83.5       | 29.96 | 0.25  |
| H                          | 16.0 | 40.17 | 1.671  | 77.91     | 6.47 | 0.31      | 43.0                                | 92.6       | 30.94 | 0.27  |
| I                          | 18.0 | 40.61 | 1.552  | 81.21     | 3.22 | 0.33      | 41.2                                | 97.1       | 29.98 | 0.35  |
| J                          | 25.0 | 46.40 | 1.805  | 99.39     | 2.04 | 0.28      | 37.0                                | 100.0      | 30.76 | 0.47  |
| <b>Integrated age ± 2σ</b> |      |       |        | n=10      | 71.0 | 0.48      | K2O=1.69%                           |            | 29.90 | 0.58  |
| <b>Plateau ± 2σ</b>        |      |       |        | steps D-J | n=7  | MSWD=1.86 | 61.4                                | 0.51 ±0.39 | 86.5  | 30.48 |
| <b>Isochron±2σ</b>         |      |       |        | steps A-J | n=9  | MSWD=3.45 | <sup>40</sup> Ar/ <sup>36</sup> Ar= | 292.0±2.7  | 30.86 | 0.43  |

**06L-52**, Groundmass Concentrate, 24.4 mg, J=0.0007244±0.07%, NM-205K, Lab#=56987-01

|                            |        |        |        |           |       |           |                                     |            |        |       |
|----------------------------|--------|--------|--------|-----------|-------|-----------|-------------------------------------|------------|--------|-------|
| X A                        | 550.0  | 4320.0 | 1.177  | 14649.8   | 0.165 | 0.43      | -0.2                                | 0.4        | -11.86 | 24.70 |
| Xi B                       | 625.0  | 169.8  | 0.3817 | 516.4     | 1.95  | 1.3       | 10.2                                | 5.8        | 22.73  | 0.91  |
| Xi C                       | 700.0  | 57.74  | 0.6492 | 118.9     | 2.20  | 0.79      | 39.3                                | 11.8       | 29.82  | 0.31  |
| D                          | 750.0  | 47.91  | 0.7732 | 81.48     | 1.47  | 0.66      | 49.9                                | 15.8       | 31.43  | 0.28  |
| E                          | 800.0  | 57.68  | 0.8124 | 112.1     | 2.18  | 0.63      | 42.7                                | 21.7       | 32.38  | 0.35  |
| F                          | 875.0  | 68.58  | 0.7526 | 150.6     | 6.08  | 0.68      | 35.2                                | 38.3       | 31.77  | 0.29  |
| G                          | 975.0  | 53.90  | 0.8287 | 101.0     | 6.86  | 0.62      | 44.8                                | 57.0       | 31.74  | 0.22  |
| H                          | 1075.0 | 42.11  | 1.126  | 61.68     | 3.80  | 0.45      | 56.9                                | 67.4       | 31.55  | 0.19  |
| I                          | 1250.0 | 58.45  | 2.805  | 116.8     | 5.94  | 0.18      | 41.3                                | 83.6       | 31.83  | 0.24  |
| X J                        | 1700.0 | 57.15  | 5.408  | 109.9     | 6.01  | 0.094     | 44.0                                | 100.0      | 33.15  | 0.24  |
| <b>Integrated age ± 2σ</b> |        |        |        | n=10      | 36.7  | 0.27      | K2O=0.80%                           |            | 31.23  | 0.68  |
| <b>Plateau ± 2σ</b>        |        |        |        | steps D-I | n=6   | MSWD=1.15 | 26.3                                | 0.51 ±0.38 | 71.8   | 31.72 |
| <b>Isochron±2σ</b>         |        |        |        | steps A-J | n=8   | MSWD=6.47 | <sup>40</sup> Ar/ <sup>36</sup> Ar= | 294.8±2.3  | 32.05  | 0.35  |

**07L-89**, Groundmass Concentrate, 14.6 mg, J=0.0009871±0.08%, NM-222E, Lab#=58870-01

|     |     |       |        |       |      |     |      |      |       |      |
|-----|-----|-------|--------|-------|------|-----|------|------|-------|------|
| X A | 3.0 | 226.0 | 0.2112 | 702.5 | 2.62 | 2.4 | 8.2  | 2.5  | 33.10 | 1.75 |
| X B | 4.0 | 82.63 | 0.3316 | 222.4 | 4.28 | 1.5 | 20.5 | 6.5  | 30.37 | 0.61 |
| C   | 4.5 | 38.64 | 0.3102 | 71.31 | 4.73 | 1.6 | 45.5 | 11.0 | 31.53 | 0.31 |
| D   | 6.0 | 37.22 | 0.2870 | 64.99 | 9.48 | 1.8 | 48.5 | 19.9 | 32.31 | 0.24 |

|                              |      |           |        |           |       |                                  |                 |       |       |      |
|------------------------------|------|-----------|--------|-----------|-------|----------------------------------|-----------------|-------|-------|------|
| E                            | 8.0  | 34.63     | 0.2645 | 56.66     | 18.5  | 1.9                              | 51.7            | 37.4  | 32.09 | 0.18 |
| F                            | 10.0 | 37.37     | 0.3847 | 66.60     | 39.6  | 1.3                              | 47.4            | 74.7  | 31.76 | 0.19 |
| G                            | 13.0 | 45.73     | 0.5028 | 95.01     | 10.3  | 1.0                              | 38.7            | 84.4  | 31.72 | 0.29 |
| H                            | 16.0 | 46.62     | 0.5096 | 97.51     | 6.99  | 1.0                              | 38.3            | 90.9  | 31.98 | 0.32 |
| I                            | 18.0 | 46.03     | 0.4924 | 96.29     | 4.08  | 1.0                              | 38.3            | 94.8  | 31.57 | 0.35 |
| J                            | 25.0 | 47.76     | 0.4623 | 101.5     | 5.53  | 1.1                              | 37.3            | 100.0 | 31.91 | 0.32 |
| Integrated age $\pm 2\sigma$ |      |           | n=10   |           | 106.1 | 1.4                              | K2O=2.83%       |       | 31.86 | 0.47 |
| Plateau $\pm 2\sigma$        |      | steps C-J | n=8    | MSWD=1.04 | 99.2  | 1.4                              | $\pm 0.8$       | 93.5  | 31.91 | 0.19 |
| Isochron $\pm 2\sigma$       |      | steps A-J | n=10   | MSWD=1.53 |       | $^{40}\text{Ar}/^{36}\text{Ar}=$ | 294.1 $\pm$ 2.4 |       | 32.09 | 0.39 |

**06L-58**, Groundmass Concentrate, 20.6 mg, J=0.0007301 $\pm$ 0.05%, NM-205J, Lab#=56980-01

|                              |        |           |        |           |       |                                  |                 |       |        |       |
|------------------------------|--------|-----------|--------|-----------|-------|----------------------------------|-----------------|-------|--------|-------|
| X A                          | 550.0  | 3266.8    | 0.2978 | 11144.3   | 0.093 | 1.7                              | -0.8            | 0.3   | -35.53 | 20.38 |
| Xi B                         | 625.0  | 40.48     | 0.2751 | 82.59     | 2.22  | 1.9                              | 39.8            | 7.4   | 21.39  | 0.22  |
| Xi C                         | 700.0  | 32.40     | 0.4948 | 35.95     | 3.27  | 1.0                              | 67.3            | 17.8  | 28.94  | 0.14  |
| X D                          | 750.0  | 32.26     | 0.7925 | 26.69     | 2.82  | 0.64                             | 75.8            | 26.8  | 32.39  | 0.14  |
| E                            | 800.0  | 30.07     | 0.7803 | 17.15     | 3.49  | 0.65                             | 83.4            | 38.0  | 33.21  | 0.11  |
| F                            | 875.0  | 28.57     | 0.6304 | 12.47     | 5.25  | 0.81                             | 87.3            | 54.7  | 33.05  | 0.09  |
| G                            | 975.0  | 27.76     | 0.6664 | 9.563     | 6.19  | 0.77                             | 90.0            | 74.5  | 33.11  | 0.07  |
| H                            | 1075.0 | 27.13     | 1.021  | 8.925     | 3.57  | 0.50                             | 90.6            | 85.9  | 32.58  | 0.09  |
| I                            | 1250.0 | 31.06     | 5.910  | 24.69     | 1.51  | 0.086                            | 78.1            | 90.7  | 32.25  | 0.18  |
| J                            | 1700.0 | 37.85     | 7.901  | 47.18     | 2.92  | 0.065                            | 64.9            | 100.0 | 32.71  | 0.16  |
| Integrated age $\pm 2\sigma$ |        |           | n=10   |           | 31.3  | 0.32                             | K2O=0.80%       |       | 31.46  | 0.26  |
| Plateau $\pm 2\sigma$        |        | steps E-J | n=6    | MSWD=9.33 | 22.9  | 0.58 $\pm 0.66$                  | 73.2            |       | 32.92  | 0.25  |
| Isochron $\pm 2\sigma$       |        | steps A-J | n=8    | MSWD=9.13 |       | $^{40}\text{Ar}/^{36}\text{Ar}=$ | 290.5 $\pm 2.4$ |       | 32.99  | 0.10  |

**07L-85**, Groundmass Concentrate, 9.8 mg, J=0.0009802 $\pm$ 0.08%, NM-222D, Lab#=58788-02

|                              |      |       |            |        |            |                                               |                   |       |       |      |
|------------------------------|------|-------|------------|--------|------------|-----------------------------------------------|-------------------|-------|-------|------|
| X A                          | 3.0  | 865.8 | 0.7791     | 2856.8 | 0.893      | 0.65                                          | 2.5               | 2.1   | 38.53 | 7.01 |
| X B                          | 4.0  | 76.54 | 0.6063     | 190.6  | 3.32       | 0.84                                          | 26.5              | 9.7   | 36.02 | 0.59 |
| Xi C                         | 4.5  | 43.88 | 0.5683     | 80.06  | 3.37       | 0.90                                          | 46.2              | 17.5  | 36.02 | 0.38 |
| X D                          | 6.0  | 40.95 | 0.5383     | 72.29  | 11.4       | 0.95                                          | 47.9              | 43.9  | 34.90 | 0.28 |
| X E                          | 8.0  | 31.33 | 0.7117     | 44.20  | 10.7       | 0.72                                          | 58.5              | 68.5  | 32.60 | 0.18 |
| X F                          | 10.0 | 27.58 | 1.049      | 32.39  | 4.42       | 0.49                                          | 65.6              | 78.7  | 32.20 | 0.19 |
| X G                          | 13.0 | 41.72 | 1.596      | 79.61  | 2.99       | 0.32                                          | 43.9              | 85.6  | 32.64 | 0.44 |
| Xi H                         | 16.0 | 63.09 | 1.772      | 156.4  | 2.75       | 0.29                                          | 27.0              | 91.9  | 30.35 | 0.62 |
| Xi I                         | 18.0 | 66.26 | 1.947      | 167.4  | 1.57       | 0.26                                          | 25.6              | 95.5  | 30.23 | 0.82 |
| X J                          | 25.0 | 70.35 | 2.753      | 177.7  | 1.94       | 0.19                                          | 25.7              | 100.0 | 32.20 | 0.62 |
| Integrated age $\pm 2\sigma$ |      |       | n=10       |        | 43.4       | 0.54                                          | K2O=1.74%         |       | 33.59 | 0.70 |
| Plateau $\pm 2\sigma$        |      |       | no plateau | n=0    | MSWD=0.00  | 0.000                                         | 0.000 $\pm$ 0.000 |       | 0.0   | 0.00 |
| Isochron $\pm 2\sigma$       |      |       | steps A-J  | n=7    | MSWD=14.87 | $^{40}\text{Ar}/^{36}\text{Ar}= 300.3\pm 2.2$ |                   | 32.49 | 0.32  |      |

**07L-87**, Groundmass Concentrate, 17.2 mg, J=0.0009794 $\pm$ 0.06%, NM-222F, Lab#=58793-01

|                              |      |       |           |        |            |       |                                               |       |       |      |
|------------------------------|------|-------|-----------|--------|------------|-------|-----------------------------------------------|-------|-------|------|
| A                            | 3.0  | 778.4 | 0.5887    | 2571.3 | 2.97       | 0.87  | 2.4                                           | 3.0   | 33.19 | 5.82 |
| B                            | 4.0  | 54.82 | 0.6137    | 122.2  | 8.26       | 0.83  | 34.2                                          | 11.2  | 33.33 | 0.36 |
| C                            | 4.5  | 27.66 | 0.5222    | 29.45  | 9.14       | 0.98  | 68.7                                          | 20.3  | 33.76 | 0.14 |
| D                            | 6.0  | 23.96 | 0.3771    | 17.69  | 43.0       | 1.4   | 78.3                                          | 63.2  | 33.35 | 0.09 |
| E                            | 8.0  | 22.84 | -0.1776   | 15.12  | 23.1       | -     | 80.4                                          | 86.3  | 32.61 | 0.09 |
| Xi F                         | 10.0 | 25.63 | 0.6915    | 25.10  | 6.16       | 0.74  | 71.3                                          | 92.5  | 32.49 | 0.17 |
| Xi G                         | 13.0 | 29.45 | 1.049     | 38.09  | 2.85       | 0.49  | 62.1                                          | 95.3  | 32.52 | 0.30 |
| Xi H                         | 16.0 | 34.78 | 13.71     | 56.87  | 1.67       | 0.037 | 54.9                                          | 97.0  | 34.26 | 0.83 |
| Xi I                         | 18.0 | 39.81 | -13.0978  | 76.12  | 0.867      | -     | 40.8                                          | 97.8  | 28.62 | 1.41 |
| Xi J                         | 25.0 | 39.23 | 2.532     | 72.29  | 2.18       | 0.20  | 46.1                                          | 100.0 | 32.18 | 0.40 |
| Integrated age $\pm 2\sigma$ |      |       | n=10      |        | 100.2      | 1.1   | K2O=2.28%                                     |       | 33.10 | 0.53 |
| Plateau $\pm 2\sigma$        |      |       | steps A-E | n=5    | MSWD=15.01 | 86.5  | 0.88 $\pm$ 0.43                               | 86.3  | 33.14 | 0.44 |
| Isochron $\pm 2\sigma$       |      |       | steps A-E | n=5    | MSWD=18.87 |       | $^{40}\text{Ar}/^{36}\text{Ar}= 297.0\pm 2.2$ |       | 33.10 | 0.15 |

**07L-92**, Groundmass Concentrate, 16.5 mg, J=0.0010117 $\pm$ 0.06%, NM-222F, Lab#=58790-01

|      |      |       |        |        |       |      |      |      |       |      |
|------|------|-------|--------|--------|-------|------|------|------|-------|------|
| X A  | 3.0  | 351.4 | 0.9691 | 1121.1 | 1.96  | 0.53 | 5.7  | 2.1  | 37.04 | 2.78 |
| X B  | 4.0  | 77.21 | 0.7822 | 199.1  | 5.64  | 0.65 | 23.9 | 8.3  | 33.88 | 0.56 |
| Xi C | 4.5  | 30.88 | 0.7659 | 40.51  | 7.06  | 0.67 | 61.4 | 16.0 | 34.82 | 0.20 |
| Xi D | 6.0  | 24.42 | 0.6679 | 19.33  | 20.0  | 0.76 | 76.8 | 37.7 | 34.43 | 0.10 |
| X E  | 8.0  | 21.38 | 0.4755 | 10.90  | 46.8  | 1.1  | 85.1 | 88.6 | 33.40 | 0.07 |
| Xi F | 10.0 | 22.15 | 0.6720 | 15.37  | 4.96  | 0.76 | 79.8 | 94.0 | 32.44 | 0.15 |
| X G  | 13.0 | 43.31 | 1.096  | 85.85  | 2.61  | 0.47 | 41.6 | 96.9 | 33.11 | 0.40 |
| X H  | 16.0 | 37.13 | 1.122  | 66.15  | 1.32  | 0.45 | 47.6 | 98.3 | 32.46 | 0.55 |
| X I  | 18.0 | 39.62 | 1.149  | 72.48  | 0.731 | 0.44 | 46.2 | 99.1 | 33.61 | 0.79 |

|                                                |      |       |            |       |           |                                                     |                        |       |       |      |
|------------------------------------------------|------|-------|------------|-------|-----------|-----------------------------------------------------|------------------------|-------|-------|------|
| X J                                            | 25.0 | 47.74 | 1.280      | 102.0 | 0.823     | 0.40                                                | 37.1                   | 100.0 | 32.50 | 0.76 |
| <b>Integrated age <math>\pm 2\sigma</math></b> |      |       | n=10       |       | 91.8      | 0.82                                                | K <sub>2</sub> O=2.11% |       | 33.78 | 0.32 |
| <b>Plateau <math>\pm 2\sigma</math></b>        |      |       | no plateau | n=0   | MSWD=0.00 | 0.0                                                 | 0.00 $\pm$ 0.00        |       | 0.00  | 0.00 |
| <b>Isochron<math>\pm 2\sigma</math></b>        |      |       | steps A-J  | n=7   | MSWD=1.30 | <sup>40</sup> Ar/ <sup>36</sup> Ar= 296.2 $\pm$ 2.0 |                        |       | 33.38 | 0.15 |

**06L-50**, Homblende, 18.5 mg, J=0.0007351 $\pm$ 0.05%, NM-205P, Lab#=#57021-01

|                                                |        |       |           |        |           |                                                     |                        |       |       |       |
|------------------------------------------------|--------|-------|-----------|--------|-----------|-----------------------------------------------------|------------------------|-------|-------|-------|
| Xi A                                           | 800.0  | 500.5 | 6.291     | 1643.3 | 0.456     | 0.081                                               | 3.1                    | 2.6   | 20.78 | 3.06  |
| B                                              | 900.0  | 106.3 | 1.612     | 274.6  | 0.154     | 0.32                                                | 23.8                   | 3.5   | 33.74 | 1.48  |
| C                                              | 1000.0 | 100.3 | 2.259     | 253.0  | 0.130     | 0.23                                                | 25.7                   | 4.3   | 34.35 | 1.72  |
| D                                              | 1100.0 | 75.85 | 3.951     | 165.9  | 0.882     | 0.13                                                | 35.8                   | 9.3   | 36.28 | 0.54  |
| E                                              | 1130.0 | 62.08 | 4.481     | 121.6  | 3.60      | 0.11                                                | 42.7                   | 30.0  | 35.44 | 0.29  |
| F                                              | 1160.0 | 36.78 | 4.386     | 35.72  | 3.96      | 0.12                                                | 72.3                   | 52.8  | 35.54 | 0.15  |
| G                                              | 1190.0 | 31.25 | 4.715     | 17.76  | 5.33      | 0.11                                                | 84.5                   | 83.4  | 35.28 | 0.10  |
| H                                              | 1220.0 | 31.97 | 4.948     | 19.99  | 2.79      | 0.10                                                | 82.8                   | 99.4  | 35.39 | 0.12  |
| I                                              | 1250.0 | 55.83 | 5.910     | 100.9  | 0.039     | 0.086                                               | 47.4                   | 99.6  | 35.44 | 3.31  |
| J                                              | 1300.0 | 106.1 | 6.431     | 275.4  | 0.024     | 0.079                                               | 23.8                   | 99.8  | 33.81 | 5.78  |
| X K                                            | 1650.0 | 113.2 | 11.88     | 317.7  | 0.042     | 0.043                                               | 17.9                   | 100.0 | 27.33 | 3.87  |
| <b>Integrated age <math>\pm 2\sigma</math></b> |        |       | n=11      |        | 17.4      | 0.11                                                | K <sub>2</sub> O=0.49% |       | 35.04 | 0.41  |
| <b>Plateau <math>\pm 2\sigma</math></b>        |        |       | steps B-J | n=9    | MSWD=0.81 | 16.9                                                | 0.11 $\pm$ 0.16        |       | 97.1  | 35.38 |
| <b>Isochron<math>\pm 2\sigma</math></b>        |        |       | steps B-K | n=10   | MSWD=1.31 | <sup>40</sup> Ar/ <sup>36</sup> Ar= 296.2 $\pm$ 3.1 |                        |       | 35.37 | 0.18  |

#### Notes:

X preceding sample ID denotes analyses excluded from plateau or weighted mean age calculations.  
i preceding sample ID denotes analyses excluded from isochron age calculations.  
Isotopic ratios corrected for blank, radioactive decay, & mass discrimination  
Errors quoted for individual analyses includes analytical errors, interfering reactions, and J uncertainties.

#### Age calculations:

Ages calculated relative to neutron flux monitor Fish Canyon Tuff Sanidine (FC-2). Assigned age = 28.201 Ma (Kuiper et al., 2008)

<sup>40</sup>K Decay Constant (LambdaK total) = 5.463e-10/a (Min et al., 2000)

Integrated age calculated by summing isotopic measurements of all steps.

Integrated age error calculated by quadratically combining errors of isotopic measurements of all steps.

Plateau age is inverse-variance-weighted mean of selected steps.

Plateau age error is inverse-variance-weighted mean error (Taylor, 1982) times root MSWD where MSWD>1.

Plateau error is weighted error of Taylor (1982).

Mean age is weighted mean age of Taylor (1982). Mean age error is weighted error of the mean multiplied by the root of the MSWD

where MSWD > 1, and also incorporates uncertainty in J factors and irradiation correction uncertainties.

MSWD values are calculated for n-1 degrees of freedom for plateau age.

Isochron ages, <sup>40</sup>Ar/<sup>36</sup>Ar and MSWD values calculated from regression results obtained by the methods of York (1969).

Isotopic abundances after Steiger and Jäger (1977).

Weight percent K<sub>2</sub>O calculated from <sup>39</sup>Ar signal, sample weight, and instrument sensitivity.

Mean age errors reported at 2-sigma. All other errors at 1-sigma.

#### Sample preparation and irradiation:

Concentrated groundmass and mineral separates prepared from bulk samples using crushing, grinding, Frantz magnetic separation, acid washing (7% HCl to remove CaCO<sub>2</sub> and 7% HF to remove glass, if present), heavy density liquid techniques, and hand-picking.

Samples were loaded into machined Al discs and irradiated in the NM-205 and 222

positions at the Nuclear Science Center, College Station, TX along with the neutron flux monitor Fish Canyon Tuff sanidine FC-2.

#### Instrumentation:

Isotopic ratios determined with MAP 215-50.

Single crystals of sanidine were fused using a focused CO<sub>2</sub> laser.

Groundmass, biotite, hornblende, and plagioclase were tep-heated using a Mo double-vacuum resistance furnace (heating duration ~10 minutes/step).

Reactive gases removed during furnace (laser) analysis by reaction with 3 (2) SAES GP-50 getters, 2 (1) operated

at ~450°C and 1 at 20°C. Gas also exposed to a W filament operated at ~2000°C.

Gas (except from sanidine) also exposed to cold finger operated at -140°C.

#### Analytical Parameters:

MAP 215-50 Mass Spectrometer sensitivity = 5E-17 mol/pA



J-factors determined to a precision of 0.01 to 0.03% by CO<sub>2</sub> laser fusion of typically 6 FC-2 crystals from multiple radial positions

Correction factors for interfering nuclear reactions were determined using K-glass and CaF<sub>2</sub>.

$$(^{39}\text{Ar}/^{37}\text{Ar})\text{Ca} = 6.8\text{e-}4 \pm 5.0\text{e-}5$$

$$(^{36}\text{Ar}/^{37}\text{Ar})\text{Ca} = 2.8\text{e-}4 \pm 2.0\text{e-}5$$

$$(^{38}\text{Ar}/^{39}\text{Ar})\text{K} = 1.08\text{e-}2 \pm 0\text{e-}05$$

$$(^{40}\text{Ar}/^{39}\text{Ar})\text{Ca} = 0.0 \pm 4\text{e-}4$$
